# Supplementary material for: Genome Evolution and Diversity of Wild and Cultivated Rice Species
Source: Research Square preprint supplement (doi:10.21203/rs.3.rs-4350570/v1), 2024-05-09
Supplement: Supplementary file 1 [file 013a89e4cb93d13f047261a2.xlsx]

## Sheet: Collinear gene in rice1
Number of collinear genes between wild and cultivated genomes corresponding to the reference genome
Species/Cultivated name	Number
O. meyeriana	18463
O. rufipogon	23812
O. grandiglumis|Ct	19018
O. grandiglumis|Dt	18510
O.latifolia|Ct	20753
O.latifolia|Dt	20049
O. malampuzhaensis|Bt	20781
O. malampuzhaensis|Ct	20524
O. alta|Ct	18949
O. alta|Dt	18644
O. minuta|Bt	20536
O. minuta|Ct	20554
O. officainalis	19865
O. australiensis	20463
O. punctata|Bt	20838
O. punctata|Ct	20960
O. rhizomatis	21013
O. brachyantha	18960
O. eichingeri	20448
O. glumaepatula	22627
2428	27601
9311	27599
Basmati1	28042
CG14	26671
CN1	27738
D62	26266
FH838	26011
G8	27266
II32	27586
IR64	26517
J4155	27328
Kosh	29061
KY131	28832
Lemont	27983
LJ	28325
N22	27267
R498	29623
Y3551	27285
ZH11	27988

## Sheet: SV effect gene expression
Structural variation affects the expression of 88 genes associated with important agronomic traits
Gene expression alter by SV	Traits	Gene name
OsNipG0103660400.01	dwarf,male sterility,sterility,pollination,panicle flower,flowering,pollen,tapetum,pollen development,anther development	OsATG7; ATG7;
OsNipG0104150400.01	cell wall	OsIRX9L; OsGT43F; GT43F;
OsNipG0104361900.01	flower,sucrose,blight,leaf,culm,disease resistance,cell death,cterial blight,blast resistance,lesion mimic,blast,defense,bacterial blight,senescence,defense response	spl28*; SPL28;
OsNipG0104597400.01	abiotic stress	PFK2; OsPFK02; PFK02;
OsNipG0104741200.01	salt tolerance,drought tolerance,salt,drought	OsPK07; OsPK7; OsCIPK12; CIPK12; PK7;
OsNipG0104864800.01	disease resistance,alkaline tolerance,atpase,oxidative stress,defense,alkaline stress	ALT1;
OsNipG0105039100.01		RTUB-1; TUBB4; Ostub16; tub-16; R1623; OsTB-16; beta-tubulin; OsTUB4; TUB4;
OsNipG0105274800.01		OsSCP5; SCP5;
OsNipG0105553900.01	tillering,sucrose,tiller,growth rate,dwarf,yield,sucrose supply,tiller bud outgrowth,culm,stress tolerance,leaf,tiller number,growth	FBP1; FR; OsFBP1; moc2; Oscfbp1; OsFR; MOC2;
OsNipG0105760700.01		OsEnS-20; pPLAIIalpha; OspPLAIIalpha;
OsNipG0206365500.01	grain filling,grain,yield,grain weight,grain yield,palea,lemma,spikelet	INV3; OsINV3; OsVIN2;
OsNipG0206562300.01	biotic stress,nitrate,dormancy,salt,stress tolerance,map-based cloning,seed,stress,seedling,salt stress,abiotic stress
OsNipG0206952300.01		OsFbox071
OsNipG0207085100.01	stress tolerance	OsTET2; TET2;
OsNipG0207662600.01		OsFbox81; Os_F0375; OsFbox081;
OsNipG0209655500.01	arsenic accumulation,stress tolerance	OsGrx_C2.1; Grx_C2.1; OsGRX9; GRX9;
OsNipG0209979900.01	disease resistance	RLCK81; OsRLCK81; OsPUB55;
OsNipG0210326000.01	root,cold tolerance,grain,stress tolerance,reproductive,leaf,growth,grain yield,temperature,vegetative,yield	OsFAD2-1; OsFAD2; FAD2;
OsNipG0210696500.01	stress tolerance,transporter	OsMTP8;
OsNipG0210891100.01	meiotic,meristem,root,root apical meristem,shoot apical meristem,stress tolerance,shoot,cell cycle	PCNA; OsPCNA;
OsNipG0311181100.01	stress tolerance
OsNipG0311282900.01	OsCA4.1; OsIOSCA4.1; OsOSCA4.1;	OsCA4.1; OsIOSCA4.1; OsOSCA4.1;
OsNipG0311794500.01	root growth	ORR1; RR21; OsRRB1; Orr1; OsRR21; OsRR19;
OsNipG0311794800.01	stress tolerance	TPS4; ORR1; OsTPS4;
OsNipG0311961600.01	drought tolerance,disease resistance,black streak dwarf virus resistance,stress tolerance,abscisic acid sensitivity	OsSCS1;
OsNipG0312813300.01	copper transporter	COPT3; OsCOPT3;
OsNipG0312943000.01	metal transporter
OsNipG0313191100.01	leaf,architecture,culm,vascular bundle,lodging resistance,cellulose,cell wall	cwa1; FP1; CWA1; bc-1; BC1; OsBC1;
OsNipG0313686300.01	mEF-G;	mEF-G;
OsNipG0313848800.01	disease resistance	OsDCL2; OsDCL2a; DCL2A;
OsNipG0314325700.01	endosperm	FtsZ2-1;
OsNipG0314329600.01	yield,grain,grain size,panicle,brassinosteroid,grain shape,seed,grain length,grain yield	OsPP54; qGL3-1; qGL3; OsPPKL1; GL3.1;
OsNipG0314793700.01	dwarf,seed germination,ethylene,seed,gibberellin,flower,disease resistance,culm,homeostasis,submergence,jasmonic acid,abscisic acid,plant height,jasmonic,growth,brassinosteroid,shoot,salicylic acid,stress tolerance,ja,sa,ja ,immunity,resistance,height,aba ,defense response,ga,ga ,sa ,defense,innate immunity	slr; OsGAI; OsRGA1; Slr1-d; OsSLR1; SLR1; slr1-1; GAI;
OsNipG0315499200.01	stress tolerance	ZFP182; ZOS3-21;
OsNipG0315515700.01	brassinosteroid-signaling kinase
OsNipG0418534700.01	disease resistance	OsRLCK149; RLCK149;
OsNipG0418903200.01	seed,root,potassium	OsSKOR; K5.1; OsK5.1;
OsNipG0419091800.01	seed,sterility,seed development	DAO
OsNipG0419538300.01	seedling,culm,sheath,growth,root,leaf,salt tolerance,stem	OsDREB4-2; CR250; OsERF033; AP2; DREB4-2; DREB; OsERF33; ERF33; OsERF#033;
OsNipG0419959700.01	stress tolerance,lesion mimic,others	CPO; CPOX; rlin1; LLM1; RLIN1;
OsNipG0420426100.01	disease resistance	OsTLP3; Os_F0401; OsTLP7; OsFbox240;
OsNipG0520475500.01	stress tolerance	OsCYP20-2; OsCYP-11; CYP20-2;
OsNipG0520789800.01	abscisic acid sensitivity,drought tolerance,stress tolerance	OsCUL1-2
OsNipG0521058400.01	seed,growth,seed germination	PI3K;
OsNipG0521109500.01	development and resistance	OsIAA16; IAA16;
OsNipG0521500300.01	development and resistance	IAA17; OsIAA17;
OsNipG0523000900.01	gibberellin,meristem,root,root meristem size,ga biosynthesis,transcription factor,others,ga deficiency,organ size,root meristem,auxin,ga,ga	OsERF#142; AP2; OsAP2-EREBP-049; SMOS1; RLA1; OsSMOS1; SHB; AP2LP; OsERF142; ERF142;
OsNipG0523128700.01	growth,shoot,drought tolerance,stomata,stress tolerance,cold tolerance,homeostasis,submergence,abscisic acid,seed,gibberellin,blast resistance,culm,disease resistance,seed germination,submergence tolerance,dwarf,tolerance,drought stress,stress,drought,aba ,blast,ga ,ga,brown planthopper,stomatal,aba,ethylene,drought stress ,cold stress	sdg; OsGID1; GID1; Thl;
OsNipG0523139600.01	disease resistance,stress tolerance	DXS1; OsDXS; OsDXS1; CLA1;
OsNipG0524235100.01	mitogen activated protein kinase 20-2	MPK20-2;
OsNipG0624435400.01	stress tolerance,copper sensitivity	OsSOD-Fe; FeSOD1; OsFSD1.1; SOD-Fe;
OsNipG0624651000.01	seedling,abiotic stress,wounding response,insect resistance,biomass production,root,disease resistance,biomass,others,abscisic acid,jasmonic acid,jasmonic,temperature,brassinosteroid,cell proliferation,protein kinase,stress tolerance,cold tolerance,grain size,salicylic acid,drought tolerance,biotic stress,drought,aba ,br signaling,br homeostasis,defense,ja ,cold stress	MPK6; MPK1; OsMAPK6; OsSIPK; OsMPK1; SIPK; OsMPK6; MAPK6; MAPK1; OsMAPK1;
OsNipG0624698600.01	heading date,lemma,pollination,vegetative,floral,male sterility,leaf,panicle flower,panicle,spikelet,meristem,floral meristem,reproductive	OsMADS5; MADS5; FDRMADS2;
OsNipG0624916500.01	stress tolerance	OsGPCR; GPCR;
OsNipG0624993100.01	flower,panicle,transcription factor,auxin,abiotic stress,germination,dormancy,drought tolerance,stress tolerance,flowering time,cold tolerance,shoot seedling,salt tolerance,others,abscisic acid,oxidative stress,salt,drought resistance,oxidative,drought,aba ,salinity	OsbZIP46; OsAREB8; OsABF2; OsABF3; ABL1; bZIP46; OsAREB1; OsABL1; BZIP46;
OsNipG0625416200.01	leaf,nitrogen	OsAS2; ASN; OsAS; AS2; OsASN2;
OsNipG0627022000.01	stress tolerance	OsLtpI.6; OsLTP1.6;
OsNipG0627201100	abiotic resistance	MRP11; OsABCC11; OsMRP11;
OsNipG0627944900.01	disease resistance,stress tolerance	OsDPK3; DPK4;
OsNipG0627945200.01	Blast disease	SPL11; OsSPL11;
OsNipG0628035100.01	stress tolerance,culm,leaf,panicle flower,drought tolerance,plant development,development,vegetative,senescence,reproductive,yield,transcription factor,grain,drought resistance,grain yield	ONAC011; NAC11; ONAC11; OMTN4;
OsNipG0628091400.01	stress tolerance,others,seed,seedling	PSR; OsPPS1; HSA32; Hsa32;
OsNipG0728492700.01	disease resistance,stress tolerance	prx98;
OsNipG0728836700.01	chlorophyll,chloroplast,development,chloroplast developmen	WP1; OsValRS2; ValRS2;
OsNipG0728957700.01	lethality,endosperm,anther,seed,panicle,root,meristem	MET1B; MET1b; OsMET1-2; OsMET1b; MET1-2; MET1; OsMet1-2;
OsNipG0728999900.01	shoot,transcription factor,transporter,soil stress,phosphate,stress tolerance,root,pi	OsPHF1; PHF1; OsWD40-137; OsSEC12;
OsNipG0729461600.01	spikelet,seed,starch,leaf,storage substances,endosperm	OsAGPL4; OsAPL4; AGPL4; APL4; OsSTA193;
OsNipG0731281400.01	male sterility,tapetal,sterility,transcription factor,pcd,development,pollination,tapetum	DTC1;
OsNipG0731499500.01	stress tolerance	OsWNK1; WNK1; MEK1;
OsNipG0731499700.01	disease resistance,abscisic acid sensitivity,stress tolerance,oxidative stress,salt tolerance,bacterial blight,drought tolerance	RPS13; OsRPS13;
OsNipG0731941200.01	calcium-dependent protein kinase	OsCPK30; OsCDPK30; CDPK30;
OsNipG0732124600.01	disease resistance,stress tolerance,panicle	OsRLCK240; RLCK240;
OsNipG0732230100.01	abscisic acid	OsSDR;
OsNipG0732267700.01	stress tolerance,panicle	RLCK242; OsRLCK242;
OsNipG0732275600.01	culm,cell wall,stress tolerance,stem	OsIRX9; OsGT43C;
OsNipG0832318400.01	heading	OsFbox403; Os_F0338; Ehd3;
OsNipG0835068800.01	disease resistance,stress tolerance	MADS23; OsMADS23;
OsNipG0835824300.01	disease resistance,dwarf,defense	OsRFPH2-10; RFPH2-10;
OsNipG0936377500.01	stress tolerance	OsWD40-166;
OsNipG0936778700.01	seedling,starch,growth,cell wall,cellulose,dwarf	RGP1; OsRab11E2; rgp1;
OsNipG0938123500.01	stress tolerance	OsGLR1.1; GLR1.2; GLR1.1; OsGLR1.2;
OsNipG0938632700.01	bacterial blight,blight resistance,defense response,blast resistance,seedling,defense,disease resistance,disease,xoo	OsBIANK1; Xb25; XB25; BIANK1;
OsNipG1041862500.01	spikelet,yield,heading date,disease resistance,anther,grain shape,tapetal,magnaporthe oryzae,pollination,culm,flowering time,development,anther development,tapetum,immunity	FRRP1; OsHUB2; HUB2;
OsNipG1041927800.01	stress response,stress tolerance,biotic stress,abiotic stress,development,transcription factor,tolerance,stress	OsSRO1a; SRO1a;
OsNipG1142426500.01	disease resistance,stress tolerance	OsMLO11; MLO11; MLO_;
|OsNipG1144603600.01	stress tolerance	OsGT6;
OsNipG1246150000.01	stress tolerance	OsTFIIS-likegene; Med26_3; OsMed26_3;
OsNipG1248002200.01	auxin,root,stress tolerance,auxin response	OsARF24; ARF24;
