# Supplementary material for: Genome Evolution and Diversity of Wild and Cultivated Rice Species
Source: Research Square preprint supplement (doi:10.21203/rs.3.rs-4350570/v1), 2024-05-09
Supplement: Supplementary file 2 [file 0d08e8266a3a1338042d1753.xlsx]

## Sheet: LTR_number
	Ogra	Omey	Osaj	Osai	Oruf	Ogra(Ct)	Ogra(Dt)	Olat(Ct)	Olat(Dt)	Omal(Bt)	Omal(Ct)	Oalt(Ct)	Oalt(Dt)	Omin(Bt)	Omin(Ct)	Oaus	Ooff	Ooff(Bt)	Ooff(Ct)	Oeic	Obry	Orhi	Oglu
Ale	215	274	263	291	302	366	534	273	513	305	23	398	613	319	278	175	110	314	254	271	187	134	200
Angela	17	41	11	22	13	155	305	203	227	139	9	133	288	121	148	924	6	54	43	69	1	13	11
Athila	153	4	179	192	79	87	69	89	58	59	8	63	63	73	62	115	39	89	79	84	1	40	145
Bianca	35	165	35	44	25	163	137	146	118	76	10	136	130	71	113	76	74	87	114	145	41	72	22
CRM	197	376	280	396	136	327	302	473	386	335	20	328	317	320	301	376	221	387	392	501	51	239	123
Ogre	352	394	298	423	144	973	1124	1501	1404	686	58	982	1154	982	1075	1795	622	798	582	1241	142	399	207
Reina	205	198	272	269	222	164	248	157	216	231	18	171	263	192	167	73	55	174	173	143	145	48	187
Retand	537	1195	765	904	482	800	334	797	380	1215	102	633	304	1250	1425	2099	751	1362	1673	1256	165	877	352
SIRE	250	240	143	225	126	289	97	370	153	197	16	244	131	242	381	662	163	264	380	466	221	295	190
TAR	135	116	148	142	94	306	276	416	377	154	20	212	257	94	56	111	25	137	277	216	142	86	126
Tekay	330	381	638	1190	315	413	442	750	703	446	41	309	396	484	522	1124	410	490	372	789	431	279	1672
Tork	80	63	25	112	41	316	259	342	253	194	18	294	356	112	121	39	110	153	203	221	97	123	43

## Sheet: LTR_size
	Ogra	Omey	Osaj	Osai	Oruf	Ogra(Ct)	Ogra(Dt)	Olat(Ct)	Olat(Dt)	Omal(Bt)	Omal(Ct)	Oalt(Ct)	Oalt(Dt)	Omin(Bt)	Omin(Ct)	Oaus	Ooff	Ooff(Bt)	Ooff(Ct)	Oeic	Obry	Orhi	Oglu
Ale	834037	1369851	915161	1011983	738741	1153564	2064252	1155435	2261696	1272166	109067	1088992	2288665	1174532	1110772	658984	535556	1254995	1247875	1270921	439930	682420	660292
Angela	107712	1403200	90731	104548	62260	2050487	6741028	2456890	7118797	1868450	150593	1789244	7049693	4731735	6617426	59990034	348463	591411	715216	1484694	3509	421070	189332
Athila	1215526	3148	998260	1087796	908347	1060672	1081869	1173290	1186198	835614	91820	1022155	1289607	715582	1050660	2519467	591193	1017662	1274478	1073018	119	633227	1217857
Bianca	280172	1451698	203351	244347	177681	1280145	1050075	1273019	1103161	672094	86033	1160388	899638	502585	772183	333915	648994	691083	1167773	1410720	198693	620468	148156
CRM	1316093	8685705	1303143	1918714	703590	3426650	3243240	5653429	5566084	3314834	222081	3457858	3597620	3412622	4296023	3699203	2564087	3930316	6016562	7842409	147500	2769293	563638
Ogre	3899260	17971821	2398908	3218221	2251170	38065106	50018946	68609184	70896924	25453011	1785366	34763301	50653709	31202982	36169492	88500713	25689060	23434135	16035660	50118531	1151365	13935309	3067790
Reina	808545	744883	902111	976985	869576	475902	970986	583460	886119	756868	45050	471182	949578	640169	545980	222830	125906	541452	614702	313401	363128	169276	629234
Retand	6053432	65907229	9808046	10692834	4812189	13226320	6292032	15421159	6474704	19113198	1864016	10685017	6248263	18479841	25362914	71250859	17019328	20671617	34478763	26716378	1346968	15904396	4548101
SIRE	1543014	4252282	808419	1307990	911259	2437547	789393	3760435	1512259	2758884	330673	2394625	1124596	3325719	4987906	11740073	2874220	3606311	8953103	11432723	1763712	3865923	1849157
TAR	1071998	968528	1272644	1061694	428870	1543478	1519854	2511080	2034066	502374	77490	1138117	1388196	383523	370775	266523	244333	680608	1443583	1053363	417858	438617	385531
Tekay	6515881	12554545	10377501	23193219	2543425	7079378	8000769	18021626	19951909	8536328	692297	5044405	7277963	8637805	11008187	74212416	10882884	7780155	6446763	19734692	5038174	6023332	40057529
Tork	380550	323033	109419	395714	106176	1650641	1451314	1616561	963190	875716	68775	1402828	1543483	386257	474787	103110	711455	898092	1309653	1327121	308854	742339	187844

## Sheet: Centromere repeat unit
The sequence of repeat unit of centromere within wild rice species
Genome_type	Species	Chr
A	O. glumaepatula	1	TAATGCCAATATTGGCACACGAGGGTGCGATGTTTTCTACTGGAATCAAAAAGTTCAAAAAACGCCAAAACATGATTTTTGGACATATTGGAGTGTATTGGGTGCGTTCGTGGCAAAAACTCACTTCGTGATTCGCGCGGCGAACTTTTGTCAAT
		2	TATTGGGTGCGTTCGTGGCAAAAACTCACTTCGTGATTCGTGCGGCGAACTTTTGTCAATTAATGCCAATATTGGGCCCACACGGATACAATGTTTTTGACCGAAATCAAAAAGTTCAAAAAGCACCAAAACATGATTTTTGGACATATTGGAGCG
		3	TGGTGCTTTTTGAACTTTTTGATTCCGGTATATTACATCCACCCACGTGTGGCAATATCGGCATTAATTGACAAAAGTTCGCCGCGCGAGTCGCGAAGTGAGTTTTTGCCATCAACGCACCCAATACACTCCAATATGTCCAAAAATCATGTTT
		4	ACGCACCCAATACACTCCAATATGTCCAAAAATCATGTTTTTGTTGTTTTTGAACTTTTACATTCCGGTGAAAAACTTCGCACCCACGTGTGCCAATATATGCCAATATTGGCATTAATTGACAAAAGTTCGCCGCGCGAATCACGAAGTGAGTTTTTGCCACGA
		5	TGCCAATATTGGCATTAATTGACAAAAGTTCGCCGCGCGAATCACGAAGTGAGTTTTTGCCACGAACGCACCCAATACACTCCAATATGTCCAAAAATCATGTTTTGGTGCTTTTTGAACTTTTTCATTCCGGTCAAAAACATCGCACCCTCGTG
		6	CGCACCCAATACACTCCAATATGTCCAAAAATCATGTTTGGGTGCTTTTTGAACTTTTTCGATTCCGGTATATTACAACGCACCCACGAGTGGCAATATCGGCATTAATTGACAAAAGTTCGCCGCGCGAGTCGCGAAGTGAGTTTTTGCCACGAA
		7	CTTCGTGATTCGCGCGGTGAACTTTTGTCAATTAATGCCAATATTGGCACACGAGGGTGCGATGTTTTTGACCGGAATCAAAAAGTTCAAAAAACACCAAAACATGATTTTTGGACATATTGGAGTGTATTGGGTGCGTTCGTGGCAAAAACTCA
		8	ATGTTTTGGTGCTTTTTGAACTTTTTGATTCCGGTATATAACATCGCACCCACGTGTGGCAATATCGGCATTAATTGACAAAAGTTCGCCGCGCGAGTCGCGAAGTGAGTTTTTGCCACGAACGCACCCAATACACTCCAATATGTCCAAAAATC
		9	ACTCACTTCGTGATTCGCGCGGAGAACTTTTGTCAATTAATGCCATTATTGGCCCACGTGGGTACGATATTTTCGACCGAAATGAAAAAGTTCAAAAAGCCCCAAAACATGATTTTTGGACATATTGGAGTGTATTGGGTGCGTTCGTGGCAAAA
		10	CACCCGTGGGGGCTCAATATATGCCAATATTGGCATTAATTGACAAAAGTTCGTCGTGCGAATCACGAAGTGAGTTTTTGCCACGAACGCACCCAATACACTCCAACATGTCCAGAAATCATGTTTTGGTGCTTTTTGAACTTTTTCATTCCGGTCATAAAACATC
		11	AAGTTCGCCGCGCGAATCACGAAGTGAGTTTTTGCCACGAACGCACCCAATACACTCCAATATGTCCAAAAATCATGTTTTGGTGTTTTCTGGACTTTTTCATTCCTGACAAAAACATCGCACCCGTGTGGGCCAATATATGCCAATATTCGCATTAATTGACAA
		12	TGGACATATTGGAGTGTATTGGGTGCGTTCGTGGCAAAAAATCACTTCGTGATTCGCGCGGCGAACTTTTGTCAATTAATGCCAATATTGGCACACGTGGGTGCGATGTTTTAGACCGGAATGAAAAAGTTCAAAAAGCACCAAAACATGATTTT
B	O. minuta	1	AACTTTTTTGTTCCGGCTAAAAACATCGCACCCACGTGTGCTATGCCAATATTGGCATTAATTGACAAAAGTTCGCCGCGCGAGTCACGGAGTGATTTTTCGACACGTACGCACCCAATCCACTCCAATATGTCCAAAACTCATGTTTTGGTGCTTTTTG
		2	CTCCAATATGTCCAAAACTCATGTTTTGGTGCTTTTTGAACTTTTTCGTTCCGGCTAAAAACGTCGCACCCACGTGTGCCAATATTGGCATTAATTGACAAAAGTTCGCCGCGCCAGTCACGAAGTGATTTTTCGACACGTACGCACCCAATCCA
		3	TGACTCGCGCGATGAACTTTTGTCAATTCATGCCAATATTGGCACACGTGGGTGCGATGTTTCTATCCGGAACATAAAAGTTCTAAAAGCACCAAAACATGAGTTTTGGACATATTGGAGTGGATTGGGTGCGTCCGTGTCGAAAAATCACTCCG
		4	GATGTTTTTAGCCGGAACGAAAAAGTTCAAAAAGCACCAAAACATGAGTTTTGGACATATTGGTGTGGATTGGGTGCGTCCGTGTCGAAAAATCACTCCGTGACTCGCGCGGCGAACTTTTGTCAATTAACGCCGATATTGGCTCACGTTGTTGC
		5	CAATATTGGCATTAATTGACAAAAGTTCGCCGCGCCAGTCACGAAGTGATTTTTCGACACGTACGCACCCAATCCACTCCAATATGTCCAAAACTCATGTTTTGGTGCTTTTTGAACTTTTTCGTTCCGGCTAAAAACATCGCACCCACGAGT
		6	CAATATTGGCATTAATTGACAAAAGTTCGCCGCGCGAGTCACGGAGTGATTTTTCGACACGGACGCACCCAATGCACTCCAATATGTCCTAAACTCATGTTTTGGTGCTTTTTGAACTTTTTCGTTCCGGCTAAAAACATCGCACCCACG
		7	CAAAAGTTCGCCGCGCCAGTCACGAAGTGATTTTTCGACACGTACGCACCCAATACACTCCAATATGTCCAAAACTCATGTTTTGGTGCTTTTTGAACTTTTTCGTTCCGGCTAAAAACGTCGCACCCACGTGTGCCTATAAAAGCCAATATTAGCATTAATTGA
		8	CTCGCGCGACGAACTTTTATCATTTAATGCCAATATTGGCACACGTGGGTGCGATGTTTTTAGCCGGAACGAAAAAGTTCAAAAAGCACCAAAACATGAGTTTTGGACATATTGAGGTGGATTGGGTGCGTCCGTGTCGAAAAATCACTCCGTGA
		9	AAAACGTCGCACCCACGTGTGCCTATAAGCCAATATTGGCAATAATTGACAAAAGTTCGCCGCGCCAGTCACGAAGTGATTTTTCGACACGTACGCACCCAATCCACTCCAATATGTCCAAAACTCATGTTTTGGTGCTTTTTGAACTTTTTCGTTCCGGCTA
		10	TCCAAAACTCATGTTTTGGTGCTTTTGGAACTTTTTCGTTCCGGCTAAAAACGTCGCACCCACGTGTGCCTATAAAAGCCAATATTGGCATTAATTGACAAAAGTTCGCCGCGCCAGTCACGAAGTGATTTTTCGACACGTACGCACCCAATCCACTCCAATATG
		11	ATTGGCATTAATTGACAAAAGTTCGCCGCGCGAGTCACGGAGTGATTTTTCGACTCGACGCACCCAATCCACCTCAATATGTCCAAAACTCATGTTTTGGAACTTTTTGAACTTTTTCGTTCCGGCTAAAAACATCGCACCCACGTGTGCCTTATAAGCCAAT
		12	CGGACACACCCAATCCACTCCAATATGTCCAAAACTCATGTTTTGGTGCTTTTTGAACTTTTTTGTTCCGGATAGAAACATCGCACCCACGTGTGCCAATATTGGCATTAATTGACAAAAGTTCGCCGCGCGAGTCACGGAGTGATTTTTCGACA
	O. punctata	1	GCCAATATTGGCATTAATTGACAAAAGTTCGCCGCGCCAGTCACGAAGTGATTTTTCGACACGTACGCACCCAATCCACTCCAATATGTCCAAAACTCATGTTTTGGTGCTTTTTGAACTTTTTCGTTCCGGCTAAAAACATCGCACCCACGTGTGCCTTTATAA
		2	TATAGGCACTCGTGGGTGCGACGTTTTTAGCCGGAACGAAAAAGTTCAAAAAGCACCAAAACATGAGTTTTGGACATATTGGAGTGGATTGGGTCCGTACGTGTCGAAAAATCACTTCGTGACTGGCGCGGCGAACTTTTGTCGATTATTGCCAA
		3	GATGTTTCTATCCGGAACAAAAAAGTTCAAAAAGCACCAAAACATGAGTTTTGGACATATTGGAGTGGATTGGGTGCGTCCGTGTCGAAAAATCACTCCGTGACTCGCGCGGCGAACTTTTGTCAATTAATGCCAATATGGCTATATCGGCACTCGTGGGTGT
		4	ATGTTTTTAGCCGGAACGAAAAAGTTCAAAAAGCACCAAAACATGAGTTTTGGACATATTGGTGTGGATTGGGTGCGTCCGTGTCGAAAAATCACTCCGTGACTCGCGCGGCGAACTTTTGTCAATTAACGCCGATATTGGCATTGGCACACGTTGTTGCG
		5	ACTTTTGTCAATTAATGCCAATATTGGCTTTTAGGCACGTGGGTGCGATGTTTTTAGCCGGAACGAAAAAGTTCAAAAAGCACCAAAACATGAGTTTTGGACATATTGGAGTGGATTGGGTGCGTACGTGTCGAAAAATCACATCGTGACTGGCGCGGCGA
		6	CCAATATTGGCTTTTATAGGCAAACGTGGGTGCGACGTTTTTAGCTGGAATGAAAAAGTTCAAAAAGCACCAAAACATGAGTTTTGGACATATTTTAGTGGATTCGGTGCGTACGTGTCGAAAAATCACTTCGTGACTGGCGCGGCGAACTTTTGTCAATTATTA
		7	GAAAAATCACTTCGTGACTGGCGCGGCGAACTTTTGTCAATTATTGCCAATATTGGCTTTTATAGGCACACGTGGGTGCGACGTTTTTAGCCGGAACGAAAAAGTTCAAAAAGCACCAAAACATGAGTTTTGGACATATTGGAGTGGATTGGGTCCGTACGTGTC
		8	ATATTGGCATTAATTGACAAAAGTTCGCCGCGCGAGTCACGGAGTGATTTTTCGACACGGACGCACCCAATCCACTCCAATATATCCAAAACTCATGTTTTGGTGCTTTTTGAACTTTTTTGTTCCGGATAGAAACATCGCACCCACGTGTGCCGC
		9	ATATTGGCAATAATTGACAAAAGTTCGCCGCGCCAGTCACGAAGTGATTTTTCGACACGTACGCACCCAATCCACTCCAATATGTCCAAAACTCATGTTTTGGTGCTTTTTGAACTTTTTCGTTCCGGCTAAAAACGTCGCACCCACGTGTGCCTATAAAAGCCA
		10	ACTCGTAGGTGCGATGTTTTTAGCCGGAACGAAAAAGTTCAAAAAGCACCAAAACATGAGTTTTGGACATATTGGAGTGGATTGGGTGCGTACGTGTCGAAAAATCACTTCGTGACTGGCGCGGCGAACTTTTGTCAATTAATGCCAA
		11	CACGAAGTGATTTTTCGACACGTACGCACCCAATCCACTCCAATATGTCCAAAACTCATGTTTTGGGGCTTTTTGAACTTTTTCGTTCCGGCTAAAAACATCGCACCCACGTGTGCCTTTATAAGCCAATATTGGCATTAATTGACAAAAGTTCGCCGCGCCAGT
		12	GCCAATATTGGCATTAATTGACAAAAGTTCGCCGCGCGAGTCACGGAGTGATTTTTCGACACGGACGCACCCAATCCACTCCAATATGTCCAAAACTCATGTTTTGGTGCTTTTTGAACTTTTTTGTTCCGGATAGAAACATCGCACCCACGTGT
C	O. alta	1	GGTGAAAAACATCGCACTCCCTAAGCAAATATCGGCTTTAAATGTGAAAAGTTCGCCGCGCGAGTCACGGAGAGATTTTTCGAAACGAACACACCCAATCCACTCCAATATGTCCAAAACTCATGTTTTGGTGCTTTTTGAACGATTTCGTTCC
		2	ACTCCAATATGTCCAAAACTCATGTTCTGGTGCTTTTTGAACGATTTCGTTCCGGTGAAAAACATCGCATTTGCTGAGCCAATATCGGCGTTAAATGTAAAAAGTTCGCCGCGCGAGTCACGGAGAGATTTTTCGAAACGAACGCACCCAATCC
		3	AGTGGATTGGGTGCGTTCGTTTCGAAAATCTCTCCGTGACTCGCGCGGCGAACTTTTCACATTTAAAGCCGATATTTGCTCACGTAGGTGCGATGTTTTACACCGGAACGAAATCGTTCACAAAGCACCAAAACATGAGTTGTGGACATATTGG
		5	TTTTTCGAAACGAACGCACCCAATCCACTCCATTAAGTCCAAAACTCATGTTTTGGTGCTTCTTGAACGATTTCGTTCCGGTGAAAAACATCGCTCCCACGTGAGCCAATATCGGCATTAAATGAGAAAAGTTCGCCGCGCGAGTCACGGAGACA
		6	GAAACGAACGCACCCAATCCACTCCAATATGTCCAAAACTCATGTTTTGGTGCTTTTTGAACGATTTCGTTCCGGTGAAAAACATCGCACTACCTGAGCAAATATCGGCTTTAAATGTGAAAAGTTCGCCGCGCGAGTCACGGAGAGATTTTTC
		7	AACTTTTCACATTTAAACCCGATATATGCTCACGTGGGTGCGATGTTTTTCACCGGAACGAAATCGTTCAAAAAGCACCAAAACATGAGTTTTGGACATATTGGAGTGGATTGGGTGCGTTCGTTTCGAAAAATCTCTCCGTGACTCGCGCGGCG
		8	ACGCACCCAATCCACTCCAATATGTCGAAAACTCATGTTTTGGTGCTTTTTGAACGATTTCGTTCCGGTGAAAAACATCGCACTCCGCTAAGCAAATATCGGCTTTAAATGTGAAAAGTTCGCCGCGCGAGTCACGGAGAGATTTTTCGAAACGA
		9	AAAAAGCACCAAAACATGAGTTTTGGACATATTGGAGTGGATTGGGTGCGTTCGTTTCGAAAAATCTCTCCGTGACTCGCGCGGCGAACTTTTCACATTTAAAGCCGATATTTGCTCAGGTAGGTGCGATGTTTTTCACCGGAACGAAATCGTTC
		10	GACTCGCGCGGCGAACTTTTCACATTTAAAGCCGATATTTGCTCAGGTAGGTGCGATGTTTTTCACCGGAACGAAATCGTTCAAAAAGCACCAAAACATGAGTTTTGGACATATTGGAGTGGATTGGGTGCGTTCGTTTCGAAAAATCTCTCCGT
		11	TATGTCCACAACTGATGTTTTGGTGCTTTTTGAACGATTTCGTTCCGGTGAAAAACATCGCACCTACCTGAGCAAATATCGGCTTTAAATGTGAAAAGTTCGCCGCGCGAGTCACGGAGAGATTTTTCGAAACGAACGCACCCAATCCACTCCGA
		12	TGGAGTGGATTGGGTGCGTTCGTTTCGAAAAATCTCTCCGTGACTCGCGCGGCGAACTTTTTACATTTAATGCCGATATTTGCTCAAGTGGGTGCGATGTTTTTCACCGAAACGAAATCGTTCAAAAAGCACCAAAACATGAGTTTTGGACATAT
	O. eichingeri	3	CTTGAGTGGTTTCGAGCGGTTTCTTTTTAGCAACACACAAAGTTTCCGGCGACCTCACCGACTCGTGTAAAAATTAATTTTCGCAACCAATGGTGCCAAACACATTCCCATTTGCCAAAAACAAG
		4	ACACATTCCCACATGCCAAAAACACTTTTGAGTGGTTTCGAGCGGTTTCGTTTTCGCACCGTGCAATCTTTCCGGTGGAATGACAGTCTCGTGGAAGAATACTTTTCGCAATCAACGGTGCCAA
		5	GACTCATGTAAAAATTAATTTTCTAAACCAATGGTGCCAAACACATTTCCACATGCCCAAAAACACTTTTGAGTGGTTTCGAGCGGTTTGATTTTCGCACGTGCAAACTTTTCGGCAGGCTCACT
		6	GGGTTCGCAGGTAAGTTTGCACGTTTCGAAAACGAAACCACTCAAAAGTGTTTTTGGGCATGTGGGAATGTGTTTGGCACCATTGGTTGCGAAAATTAATTTTTACACGAGTCGGT
		7	CGACGTTCGGTCGGCCGGGCTGCCGAGCGAAAACTGTGTGTGACTCGTGAAGGGCTGGGCGCTCGGGGTGCATGGGGCTGGCTATGCCCCCAAACCATGTTATGTAGTGGGGGAGCCATCCCCACAGGACCCCGTGTTCGGCCGACCGAACCGAGTTTCGGT
		8	AAATTATTTTTCGCAACCAATGGTGCCAAACACATTCGTACATGCCCAAAAACACTTTTGGGTGGTTTCGAGCGGTTTCGTTTTCGCACCACACAAACTTTCCGACGGGCCAACCGACTCGTGTAA
		10	ATCTAGGAATGTGTTTCGCACAATTGGTTGCGAAAAATAGTTTTTACACGAGTCGGTGGGCCCGCCGGAAAGTTTGTGTGGTGCGAGAACGAAACCGCTCGAAACCTCTTAAAAGTTATTTTGGGC
		11	TGCCAAACACATTCCGATATGCCCAAAAACGCTTTTGAGTGGTTTCGATCGGTTTCGTTTTCGCATCACACAAACATTCCGACGGGCCCACCGACTCGTGTAAAAAGAATTTTCACAACGAAAGG
		12	GCGGGCCCACCGACTCGTGTCAAAATAAATTTTCGCAACCAATGGTACCAAACACATTCTAGTTTCCCAAAAACACATTTGAGTGGTTTCGAGTGGTTTCGTTTTCGCACCACACAAATTTTCT
	O. grandiglumis	1	TAATATTTTCACGAGTCGGTGGGCCGCTGGAAAGTTTGTGTTGGTCGAAAACGAAACCGCTCGAAACCAATCAAAAGTGTTTTTGGGCATCTAGGAATGTGTTTTGCACCATTGGTTGTGAAAAC
		3	TTTGCCCAAAAACACTATTGAGTGGTTTTGAACGGTTTCGTTTTCGTAGCACACAAACTTCCTGCGGCCCGACCGACATGTGTAAATATTAATTTTCGCAACCAACAGTGCCAAACACATTCCCA
		4	CCACAGACTCGTGTAAAAATTAATTTTCGCAACCAATGGTGCCAAACACATTCCCACATGCCCGAAAACACTTTTGAGTGGTTTCGAGCGGTTTCGTTTTCGCACATGCAAACTTTCCGGCGGGA
		5	TGGTGCGAAAACGAAACCGCTCGAAACCACTCAAAAGTGTTTTTGGGCATATGGGAAAGTGTTTGGCACCATTGGTTGCGAAAAATAGTTTTTACATGAGTCGGTGGGCCCGCCGGAAAGTTTGTG
		6	CCACCGACCGTGTAAAAATTTATTTTTGCAACCAATGGTGCCAAACACATTCCCATATGCCCAAAAACACTTTTGAGTGGTTTCGAGCGGTTTCGTTTTCGACCACACAAACTTTTCGGTGGGC
		7	TGGTCGAGGACCAGGCGTAGTCATCTCTCGACCACCCGAAGGCAACTCTGATAGGTGGTGAGAGATCGCTACAACGCTGGTCGAGGACCAGGCGTAGTCATCTCTCGACCACCCGAAGGCAACTCTGATAGGTGGTGAGAGATCGCTACAACGC
		8	TTTCGAGCGGTTTCGTTTTCGCACCACACAAACTTTCCAGCGGGCCCACCGACTCGTGTAAAAACTATTTTTCGCAACCAATGGTGCGAAACACATTCCTAGATGCCCAAAAACACTTTTGAGTGG
		9	ATTTTTGGTTGTTTCGAGCGGTGTCGTTTTCGCACCACACAAACATTCCGGCGGGCCCACCGACTCATCTAAAAACTAATTTTCGCAACCAATGGGTCGAAACACATTCCTAGATGCCCAAAAC
		10	TCGAGCGGTTTCGTTTTCGCACCACAGAAAATTACGGCAGGCCCACCGACTCGTGTAAAAACTATTTTTCGCAACAAATGGTGCGAAACACATTCCTAGATGCCCAAAAACACTTTTGGTGGTT
		11	CACCGACTCGTGTAAAAAGGAATTTTCACAACCGAAAGGTGCCAAACACATTCTGATATGCCGAAAACGCTTTTGAGTGGTTTCGATCGGTTTCGTTTTCGCATCACACAAACTTTGCGGCGGGCC
		12	TGTGTGGTGCGAAAACGAAACCGCTCGAAACCACTCAAATGTGTGTTTGGGCATCTAGGAATGTGTTTGGCACCATTGGTTGCGAAAATTTATTTTGACACGAGTCGGTAGGCCCGCCGGAAAGTT
	O. minuta	1	TTGGTTGCGAAAATTAATATTCACACGAGTCGGTAGGCCCGCCGGAAAGTTTGTGTTGGTCGAAAACGAAACCGCTCGAAACCAATCAAAAGTGTTTTTGGGCAACTAGGAATGTGTTTTGCACCA
		3	GAGCGGTTTCGTTTTCGCAGCACACAAACTTGCCGGAGGGCCCACCGACTCGTGTAAAAATTAATTTTCGCAACCAATGGTGCCAAACATATTCCCATTTGCCCAAAACACTAGTT
		4	TGCCAAACACATTCCCATATGCCCAAAAACACTTTTCAGTGGTTACGAGCGGTTTCGTTTTGGCACCGTGCAATCTTTCCGGTGGAATGACAGTCTCGTGCGAAGATTACTTTTCGCAATCAACGG
		5	AATGTTTGCAACGTGCGAAAACGAAACCGCTCGAAGCCACTCAAAAGTGTTTTTGGGCATGTGGGAATGTGTTTGGCACCATTGGTTGCGAAAATTAATTTTTACATGAGTCAGTGAGCCTGCCGA
		6	GTTTTTGGGCATGTGGGAATGTGTTTGGCACCATTGGTTGCGAAAATTAATTTTTACACGAGTCGGTGGGCTCGCAGGTAAGTTTGCACGTTTCGAAAACGAAACCACTCAAAAGT
		7	AGTCATGATGAGATTTTTCGAAACGAACACATCCAATCCACTCCAATATGTCCAAACCACTTGTTTTCTTGGTTTTTGAACTATTTCGTTCTGTTGAAAATACATCGCATCCACGTGAGCCAATATCGGCACTAAGTGCACAAACCATCGCCGTGTG
		8	CCATGATGCCCAAAAACACTTTTGAGTGGTTTCGAGCGGTTTCGTTTTGGACCAACACAAACTTTCCGGTGAGCCCATCGACTCATGTAAATACTAATTTTCGCAACCAATTGTGCTAAACACATT
		9	AAAAACTATTTTTCACAACCAATGTGTCAAACACATTCCTAAGTGCCCAAAAAACTTTTGAGTGGTTTCGAGCGGTTTCGTTTTCGCACCACACAAACTTTCTGGCGGGCCCACCGACCATGT
		10	CGAGTAGGTGGGCCCACCGTAAGTTTGTGTGGTGCGAGAACGAAACCGCTCGAAACCACTCAAAAGTGTTTTTGGGCATCTAGGAATGTGTTTTGCACCATTGGTTGCGAAAAATAGTTTTTACA
		11	CCACCGACTCGTGTAACAAAGAGTTTTTGCAACCAACGATGCCAAACACATTCCCATATGCCCAAAAACGCTTTTGAGTGGTTTCGATCGGTTTCGTTTTCGCATCACACAAACATTCCGATGGGC
		12	AATGAAACCGCTCGAAACCACTCAAATGTGTTTTTGGGGAATGGGAATGTGTTTGGCACCATTGGTTGTGAAAATTCATTTTGACACAAGTCGGTGGACCCGCTGGAAAGTTTGTGTGGTGCGAA
	O. officinalis	1	ACCACTCAAAAGTGTTTTTGGGCAACTAGGAATGTGTTTTGCACCATTGGTTGCGAAAGTTAATATTTTCACGAGTCGGTGGGCCAGCTGGAAAGTTTGTGTGGTGGGAAAACGAGACCGCTCGAT
		3	TTTGGGCAAATGGGACTATGTTTGGCACCATTGGTTGCGAAAATTAATTTTTACACGAGTCGGTGGGCCACCGGAAAGTTTGTGTGCTGCGAAAACGAAACCGCTCGAAACCACTCAACGTGTT
		4	TTCGCTTTCGCACCTGCAAACATTAAGGCGGGACCACAGACTCGCGTAAAAAGTAATTTTCGTAACCAATGGTGCCAAACACATTCCCACATGCCCGAATTCACTTTTGAGCGGTTTCGTGCGGT
		5	CCCACCGACTCGTGTAAAAATTAATTTTCGAAACCAATGGTGCCAAACACATTCCCACATGCCCAAAAACACTTTTGAGTGGTTTCGAGCGGTTTCATTTTCGCACGTTGCAAACATTCCGGCGGA
		6	CAAAAGTGTTTTTGGGCATGTGGGAATGTGTTTGGCACCATTGGTTGCGAAAATTAATTTTTACACGAGTCGGTGGGCTCGCAGGTAAGTTTGCACGTTTCGAAAACGAAACCACT
		7	AAATCTCATCATGACTCACGCGTCGATGTTTTGTGCACTTAGTGCCGATATTGGCTCACGTGGATGCGATGTATTTTCAACAGAACGAAATAGTTCAAGAACCAAGAAAACAAGAGTGTTGGACATATTGGAGTGGATTGGATGTGTTCGTTTTGAA
		8	TTGGTTGTGTAAAACAATTTTTACACGAGTCGGTGGGCCCGCTGGAAAGTTTCCATGGTGCAAAAATGAAATCGCTCGAAACCACCCAAAAGTGTTTTTGGGCATCTGGGAACGTGTTTGGCACCA
		9	CCACCGACTCATGTAAAAACTATTTTTCGCAACCAATGGTGCGAAACACATTCCTTATGCCCAAAAACACTTTTGAGTGGTTTCGAGCGGTTTCGTTTTCGCACCACACAAACATTCTGGCGGGC
		10	CGGTGGGCCCGCCGAAAAGTTTGTGTGGTGCGAGAACGAAACCGCTCGAAACCACTCAAAAGTGTTTTTGGGCATCTAGGAATGTGTTTCGCACCATTGGTTGCGAAAAATAGTTTTTACACGAGT
		11	GCCCACCGACTCGTGTAACAAAGAATTTTCACAACGAAAGGTGCCAAACACATTCCCATATGCCCAAAAACGCTTTTGAGTGGTTTCGATCGGTTTCGTTTTCGCATCACACAAACATTCCGATGG
		12	ACCATTGGTTGCGAAAATTCATTTTGACAAGAGTCGGTGGACCCGCCGGAAAGTTTGTGTGGTGCGAAAATGAAACCGCTCGAAACCACTCAAATGTGTTTTTGAGAATATGAGAATGTGTTTGGC
	O. punctata	1	GTTTTTGGGCAACTAGGAATGTGTTTTGCACCATTGGTTGCGAAAATTAATATTTTCACGAGTCGGTGGGCCGGTCGGAATGTTTGTGTTGGTCGAAAACGAAACCGCTCGAAACCAATCAAAAGT
		2	CCGACGATGAAGACGTAGACGCCCAACAACGGTGGTGCGACCAACCAACCGTGTAGGCGGAGACACCAGTCGGCGGCGGCGAAGGCAGGCCGACGATGAAGACGTAGACGCCCAACAACGGTGGTGCGACCAACCAACCGTGTAGGCGGAGACACCAGTCGGCGGCGGCGAAGGCAGG
		3	CAAACACATTCCCATTTGCCCAAAAACACTCTTGAGTGGTTTCGAGCGGTTTCGTTTTCGCAGCACACAAACTTTCCGGCGGCCTCACCGACTCGTGTAAAAATTAATTTTCGCAACCAATGGTGC
		4	GGTGCCAAAACGAAACCGCTCGTAACCACTCAAAAGTGTTTTTGGGCATTTGGGAATGTGTTTGGCACCATTGGTTGCGAAAAGTAATCTTCGCACGAGTATTGTCATTCCATCGGAAAGATTGCAC
		5	GTTTCGTTTTCGCACGTTGCAAACTTTTCGGCAGGCCCACCGACTCGTGTAAAAATTAATTTTCGCAACCAATGGTGCCAAACACATTCCCACATGCCCAAAAACACTTTTGAGTGGCTTCGAGCG
		6	CATATGGGAATGTGTTTGGCACCATTGGTTGCGAAAATTAATTTTTACACGAGTCGGTGGGCCCGCCAGAAAGTTTGTGTTGGTCAAAAACGAAACCGCTCGAAACCACTCAAAAGTGTTTTTGGG
		8	CGAGCGGTTTCGTTTTCGCACCATGCAAACTTTTGGCGGGCCCACCGACTCGTGTAAAAATTATTTTTCGCAACCAATGGTGCCAAACACGTTCCCAGATGCCCAAAAACACTTTTGGGTGGTTT
		9	CACCGAGTCATGTAAAAACTAATTTTCGCAACCAATGGGTCGAAATACATTCCCACATGCCCAAAATAATTTTTGGTTGTTTCGAGCGGTTCGTTTTCGCACCACACAAACTTTCCGGCGGGCC
		10	AAAACACATTTGAGTGGTTTCGAGCGGTTTCGTTTTCGCACCACACAAACTTTCCAGCGGGCCCACCGACTCGTGTCAAAATAAATTTTCGCAACCAACGTGCCAAACACATTCCTAGATTTCCA
		11	TCGGTTTCGTTTTCGCATCACACAAACATTCCGACGGGCCCACCGACTCGTGTAAAAAGAATTTTCACAACGAAAGGTGCCAAACACATTCTGATATGCCCAAAAACGCTTTTGAGTGGTTTCGA
		12	TGTGTGGTGCGAAAACGAAACCGCTCGAAACCACTCAAATGTGTTTTTGGGCATATGGGAATGTGTTTGGCACCATTGGTTGCGAAAATTATTTTGACACGAGTCGGTGGGCCCGCAGGAAAGTT
	O. rhizomatis	1	TTAATTTTCGCAACCAATGGTGCAAAACACATTCCTAGTTGCCCAAAAACACTTTTGATTGGTTTCGAGCGGTTTCGTTTTCGACCAACACAAACATTCCGACCGGCCCACCGACTCGTGTGAATA
		3	TTTGCCCAAAAACACTATTGAGTGGTTTCAAGCGGTTTCTTTTCGCACCACACAAACTTTCCGAGGGCCCACCGACTCGTGTAAAATTAATTTTCGAAACCAATGGTGCCAAACACATTCCCA
		4	TGTTTGGCACCGTTGGTTGCGAAAATTTATTTTTACACGAGTCTGTGGTCCAGCCTTAATGTTTGCAGGTGCGAAAACGAAACCGCTCGAAACCACTCAAAATTGTTTTTGGGCATGTGGGAATG
		5	GCTCGAAACCACTCAAAAGTGTTTTGGGCATATGGGAATGTGTTTGGCACCATTGGTTGCGAAAAATAATTTTACACGAGTCGGTGGGCCCGCGGAAAGTTTGTAGGGTGTGAAAACGAAACC
		8	CACAATCTTTTCGGCGGGCCAACCGACTCATGTAAATATTAATTTTCACAACCAATGGTGCCAAACACATTCCTAGATGCCCAAAAACACTTTTGAGTGGTTTCGAGCGGTTTGTTTTTGACCAA
		9	ACTATTTTTCGCAACCAATGGTGCGAAACACATTCCTAGATGCCCAAAAACACTTTTGAGTGGTTTCGAGCGGTTTCGTTTTCGCACCACACAAACATTCTGGCGGGCCCACGAGTCGTGCAAAA
		10	GCTCGAAACCAATCAAAAGTGTTTTTGGGCAACTAGGAATGTGTTTTGCACCATTGGTTGCAAAATTAATATTCACACGAGTCGGTGGGCCGGTCGAAAAGTTTGTGCTGGTAGAAAACGAATGC
		11	GAATGTGTTTGGCACCGTTGGTTGCGAAAATTAATTTTTACATGAGTCGGTGGGCCTGCCGGAATGTTTCCATGGTGCGGAAACAAAACAGCCGAAACCACTCAAAAGTGTTTTTGGAATATGG
		12	ATTGGTTGCGAAAATTACTTTTCACATGAGTCGGTGGTCACGCAGGAAAGTTTGTGTGGTGCGAAAACGAAACCGCTCGAAACCACTCAAATGTGGTTTTGGGCATATGAGAATGTGTTTGGCACC
D	O. alta	1	TCGTTTCGAAAAATCTCTCCGTGACTCGCGCGGCGAACTTTTCACATTTAAAGCCGATATTTGCTCAGGTAGGTGCGATGTTTTTCACCGGAACGAAATCGTTCAAAAAGCACCAAAACATGAGTTTTGGACATATTGGAGTGGATTGGGTGTGT
		2	GAACGATTTCGTTCCGGTGAAAAACATCGCACCTACCTGAGCAAATATCGGCTTTAAATGTGAAAAGTTCGCCGCGCGAGTCACGGAGAGATTTTTCGAAAGGAACGCACCCAATCCACTCCAATATGTCCAAAACTCATGTTTTGGTGCTTTTT
		3	AAACGAACGCACCCAATCCACTCCAATATGTCCAAAACTCATGTTTTGGTGCTTTTTGAACGATTTCGTTCCGGTGAAAAACATCGCACCCACGTGAGCCAATATCGGCAGTAAATGTAAAAAGTTCGCCGCGCGAGTCACGGAGAGATTTTTCG
		4	CCGGAACGAAATCGTTCAAAAAGCACCAAAACATGAGTTTTGGACATATTGGAGTGGATTGGGTGCGTTCGTTTCGAAAAATCTCTCCGTGACTCGCGCGGCGATCTTTTTGCATTTAGTACCGATATTTGCTCACGTGGTGCGATGTTTTTCA
		5	GTGACTCGCGCGGCGAACTTTTCACATTTAAAGCCGATATTTGCTCAGGTAGGTGCGATGTTTTTCACCGGAACGAAATCGTTCAAAAAGCACCAAAACATGAGTTTTGGACATATTGGAGTGGATTGGGTGCGTTCGTTTCGAAAAATCTCTCC
		6	GAGATTTTTCGAAACGAACGCACCCAATCCACTCCAATATGTCCAAAACTCATGTTTTGGTGCTTTTTGAACGATTTCGTTCCGGTGAAAAACATCGCACCTACCTAACCAAATATCGGCATTAAATGTGAAAAGTTCGCCGCGCGAGTCACGGA
		7	GTGCTTTTTGAACGATCTCGTTCCGGTGAGAAACATCCCACTCCACTGACCGAATATCGGCATTAAATGTGAAAAGTTCACCGCGCGAGTCACGGAGAGATTTTTCGAAACGAACGCACCCAATCGACTCCAATATGTCCAAAACTCATGTTTTG
		8	ACCCCGTGAGCAAATATCGGCATTAAATGTGAAAAGTTCGCCGCGCGTGTCACGGAGAGATTTTTCGAAACGAACGCACCCAATCCACTCCAATATGTCCAAAACTCATGTTTTGGTGCTTTTTGAACGATTTCGTTCCGGTGAAAAACATCGC
		9	ATATCGGCATTAAATGTAAAAAGTTCGCCGCGCGAGTCACGGAGAGATTTTTCGAAACGAACGAACCCAATCCACTCCATTATGTCCAAAGTCATGTTTTGGTGCTTTTTGAACGATTTCGTTCCGGTGAAAAACATCGCACCCACGTGAGCCA
		10	TCACCGGAACGAAATCGTTCAAAAAGCACCAAAACATGAGTTTTGGACATATTGGAGTGGATTGGGTGCGTTCGTTTCGAAAAATCTCTCCGTGACTCGCGCGGCGAACTTTTCACATTTAATGCCGATATTTGCTCAGGTAGGTGCGATGTTTT
		11	TAAAGCCGATATTTGCCAACGTGGGTGCGATGTTTTTCACCGGAACGAAATCGTTCAAAAAGCACCAAAACATGAGTTTTGGACATATTGGAGTGGATTGGGTGCGTTCGTATCGAAAAATCTCTCCGTGACTCGCAGCGGCGAACTTTTCACATT
		12	TTTTTGAACGATTTCGTTCCGGTGAAAAACATCGCACCTACCTGAGCAAATAGAGGCTTTAAATGTGAAAAGTTCGCCGCGCGAGTCACGGAGAGATTTTTCGAACGAACGCACCCAATCCACTCCAATATGTCCAAAACTCATGTTTTGGTGC
	O. grandiglumis	1	AAATGTGAAAAGTTCGCCGCGCGAGTCACGGAGAGATTTTTCGAAACGAACGCACCCAATCCACTCCAATATGTCCAAAGCTCATGTTTTGGTGCTTTTTGAACGATTTCGTTCCGGTGAAAAACATCGCACCTACCTGAGCAAATATCGGCATT
		2	TGACTCGCGCGGCGAGCTTTTCACATTTAATGCCGATATTTGCTCAGGTAGGTGCGATGTTTTTCACCAGAACAAAATCGTTCAAAAAGCACCAAAACATGAGTTTTGGACATATTGGAGTGGATTGGGTGCGTTCGTTTCGAAAAATCTCTCCG
		3	GGTGAACTTTTCACATTTAGTGCCGATATTTGCTTAGCGGAGTGCGATGTTTTTCACCGGAACGAAATCGTTCAAAAAGCACCAAAACATGAGTTTTGGACATATTGGAGTGGATTGGGTGCGTTCGTTACGAAAAATCTCTCCGTGACTCTCGC
		4	ACGAACGCACCCAATCAACTCCAATATGTCCAAAACTCATGTTTTGGTGCTTTTTGAACGATTTCGTTCCGGTGAAAAACATCGCACCCACGTGAGCAAATATCGGTACTAAATGTAAAATGTTCGCCGCGCGAGTCACGGAGAGATTTTTCGAA
		5	ACTTTTCACATTTAGTGCCGATATTTGCTTAGCGGAGTGTGATGTTTTTCACCGGAACGAAATCGTTCAAAAAGCACCAAAACATGAGTTTTGGACATATTGGAGTTGATTGGGTGCGTTCGTTTCGAAAAATCTCTCCGTGACTCGCGCGGCGA
		6	TAAATGTGAAAAGCTCGCCGCGCGAGTCACGGAGAGATTTTTCGTAACGAACGCACCCAATCCACTCCAATATGTCCAAAACTCATGTTTTGGTGCTTTTTGAACGATTTCGTTCCGGTGAAAAACACCGCACTCCGCTAAGCAAATATCGGGAC
		7	ATATTTGCTCATGTGGTGCGATGTTTTTCACCGGAACGAAATCTTTCAAAAAGCACCAAAACATGAGTCTTGGACATATTGGAGTGGATTGGATGCGTTCGTTTCAAAAAATCTCTCTGTGACTCGTGCGGCAAACTTTTTACATTTAATGCCA
		8	TTTGCTCAGGTAGGTGCGATGTTTTTCACCGGAACGAAATCGTTCAAAAAGCACCAAAACATGAGTTTTGGACATATTGGAGTGGATTGGGTGCGTTCATTTCGAAAATCTCTCCGTGACTCGCGCGGCGAACTTTTCACATTTAAAGCCGATA
		9	ATATGTCCAAAACTCATGTTTTTGTGGTTTTTTAACGATTTCGTTCCGGTGAAAAACATCGCACCTACCTGAGCAAATATCGGCTTTAAATGTGAAAAGTTCGCCGCGCGAGTCACGGAGAGATTTTTCGAAACGAACGCACCCAATCCACTCCT
		10	CTCATGTTTTGGTGCTTTTTGAACGATTTCGTTCCGGTGAAAAACATCGCACCCACTTGAGCAAATATCGGCATTAAATGTAAAAAGTTCGCCGCGCGAGTCACGGAGAGATTTTTCGAAACGAACGCACCCAATCCACTCCAATATGTCCAAAA
		11	ATCCAATATGTCCAAAACTCATGTTTTGGTGCTTTTTGAACGATTTCGTTCCGGTGAAAAACATCGCACCCACGTGAGCAAATATCGGCTTTAAATGTCAAAAGTTCGCCGCGCGAGTCACGGAGAGATTTTTCGAAACGAACACAACCAATAA
		12	AGCAAATATCGGCATTAAATGTGAAAAGTTCGCCGCGCGAGTCACGGAGAGATTTTTCGAAACGAACGCACCCAATCCACTCCAATATGTCCAAAACTCATGTTTTGGTGCTTTTTCAACGATTTCGTTCTGGTGAAAAACATCGCACCTACCTG
E	O. australiensis	1	CTCACGTGGATGCGATGTTTTCCACCGGAACGAAATAGTTCAATAAGCACCAAAACATGAGTTTTGGACATATTGGAGTGGATTGGGTGCGTTCGTTTCGAAAAATCTCTCCGTGACTCGCTTTGCGAACTTTTGACACTTAGTGTCGATATTGC
		2	TTTTCACCGAAACAAAATAGTTCAAAAAGCACCAAAACATGAGTTTTGGACATATTGGAGTGGATTGGGTGCGTTCGTTTCAAGAAATCTCTCCACGACTCGCGCGAGAACTTTTGACACTTTGTGCCGATATTGGCTCACGTGGATGCGATGT
		3	TGAAAAACATCGCATCCACGTGAGCCAATATCGGCACTAAGTGTCAAAAGTTCGCCGCGCGAGTCACGGAGAGATTTCTCGAAACGAACGCACCCAATCCACTCCAATATGTCCAAAACTCATGTTTTGGTGCTTTTTGAACAATTTCGTTCCGG
		4	AAAAAGCACCAAAACATGAGTTTTGGACATATTGGAGTGGATTGGGTGCGTTCGTTTCGAAAAATCTCTCCGTGACTCGCGCGGCGAACTTTTGACACTTAGTGCCGATATTGGCTCACGTGGATGCGATGTTTTTCACCGGAACGAAATAGCTC
		5	CACGTGGATGCGATGTTTTTCACCGGAACGAAATTGTTCAAAAAGCACCAAAACATGAGTTTTGGACATATTGGAGTGGATTGGGTGCGTTCGTTTCGACAAATCTCTCCGTGACTCGCGCGGGGAACTTTTGACACTTAGTGCCGATATTGGCT
		7	TCCACGTGAGCCAATATCGGCACTAAGTGTCAAAAGTTCGCCGCGCGAGTCACGGAGAGATTTGTCGAAACGAACGCACCCAATCCACTCCAATATGTCCAAAACTCATGTTTTGGTGCTTTTTGAACAATTTCGTTCCGGTGAAAAACATCGCA
		8	TGAGTTTTGGACATATTGGAGTGGATTGGGTGCGTTCGTTTCGAAAAATCTCTCCGTGACTCGCGCGGCGAACTTTTGACACTTAGTGCCGATATTGGCTCACGTGGATGCGATGTTTTTCACCGGAACGAAATAGTTCAAAAAGCACCAAAACA
		9	ACTCATGTTTTGGTGCTTTTTGAACAATTTCGTTCCGGTGAAAAACATCGCATCCACGTGAGCCAATATCGGCACTAAGTGTCAAAAGTTCGCCGCGCGAGTCACGGAGAGATTTGTCGAAACGAACGCACCCAATCCACTCCAATATGTCCAAA
		10	TATGTCCAAAACTCATGTTTTGGTGCTTTTTGAACTATTTCGTTCCGGTGGAAAACATCGCATCCACGTGAGCCAATATCGGCACTAAGTGTCAAAAGTTCGCCGCGCGAGTCACGGAGAGATTTTTCGAAACGAACGCACCCAATCCACTCCAA
		11	GGTGACCTCCTGGGAAGTCCTCGTGTTGCATCCCTTATTTTTTGCGGCGCGTTATTTGTACGGCGAGCGCGTCTTTTTTGGCGCACAACGCCGCACGCATCGTACAAATTCTGACGAGTGCATCCTTTCGTACGAAAACAAATGGAAAATGTGTTTCTCCCCGCTATCCCGCGTCACGGGACGAGGAGAACAAGAGGGACGGGGGCGCATGGCATATCGGATGCGATCATACCAGCACTAAAGCACCGGATCCCATCAGAACTCCGAAGTTAAGCGTGCTTGGGCGAGAGTAGTACTAGGATG
		12	AAATAGTTCAAAAAGCACCAAAACATGAGTTTTGGACATATTGGAGTGGATTGGGTGCGTTCGTTTCGAAAAATCTCTCCGTGACTCGCGCGGCGAACTTTTGACACTTAGTGCCGATATTGGCTCACGTGGATGCGATGTTTTCCACCGGAAC

## Sheet: LTR sub_family
		Osaj	Oglu	Opun|Bt	Omal|Bt	Omin|Bt	Orhi	Ooff	Oeic	Opun|Ct	Omal|Ct	Omin|Ct	Oalt|Ct	Ogra|Ct	Oalt|Ct	Oalt|Dt	Ogra|Dt	Olat|Dt	Oaus	Obra	Omey
Copia	Ale	36	38	45	43	36	4	4	13	23	0	23	26	38	9	59	73	36	46	NA	NA
	Alesia	1	1	0	0	1	0	0	0	0	0	0	0	1	0	0	0	0	0	NA	NA
	Angela	12	14	45	67	176	13	12	47	56	0	229	92	84	60	493	499	537	1	NA	NA
	Bianca	6	7	9	6	13	5	5	10	19	0	8	5	9	8	15	15	8	9	NA	NA
	Bryco	0	0	0	0	0	0	1	0	0	0	0	0	0	0	0	1	0	0	NA	NA
	Gymco-II	0	0	2	1	2	0	0	1	0	0	0	0	0	0	0	1	0	0	NA	NA
	Gymco-III	0	0	1	1	2	0	0	0	0	0	0	0	0	0	0	0	0	0	NA	NA
	Gymco-IV	0	0	0	0	0	0	0	0	1	0	0	1	0	0	0	3	3	1	NA	NA
	Ikeros	14	4	17	20	25	8	14	10	18	0	17	11	13	3	23	24	28	18	NA	NA
	Ivana	14	17	47	49	46	8	9	12	17	0	30	28	21	14	52	56	43	50	NA	NA
	Lyco	0	0	0	0	0	0	1	0	0	0	2	2	1	0	1	1	1	0	NA	NA
	mixture	1	0	0	0	3	0	3	4	1	0	5	3	0	1	6	5	3	0	NA	NA
	Osser	0	0	0	0	1	0	1	0	0	0	0	1	1	1	2	3	0	0	NA	NA
	SIRE	53	70	82	88	73	42	53	131	177	0	107	64	78	75	31	42	47	67	NA	NA
	TAR	33	32	38	35	24	14	6	9	32	0	13	24	27	15	23	34	24	37	NA	NA
	Tork	2	3	15	13	12	2	1	7	7	0	6	8	12	5	5	10	10	5	NA	NA
	Copia_unknown	359	342	345	525	554	150	190	608	455	159	516	474	497	318	1467	1354	1452	294	NA	NA
Gypsy	Athila	200	208	183	137	125	43	46	92	114	0	127	132	142	116	134	149	156	0	NA	NA
	Chlamyvir	1	0	0	0	0	0	0	0	0	0	0	0	1	1	0	2	0	0	NA	NA
	chromo-outgroup	0	0	0	0	0	0	0	1	0	0	0	0	0	0	0	1	0	0	NA	NA
	CRM	289	137	666	542	572	379	595	893	876	0	816	531	560	465	515	560	817	38	NA	NA
	Galadriel	0	0	0	1	2	0	0	1	0	0	2	0	1	0	1	1	2	0	NA	NA
	non-chromo-outgroup	0	0	0	0	0	0	0	1	0	0	0	0	0	0	0	0	0	0	NA	NA
	Ogre	205	209	718	747	720	163	296	391	269	0	578	742	968	450	1467	1624	1183	72	NA	NA
	Phygy	0	0	0	0	0	0	0	0	0	0	0	1	0	0	0	0	0	0	NA	NA
	Reina	39	35	29	48	26	4	1	4	16	0	13	6	8	7	41	44	39	35	NA	NA
	Retand	260	206	635	585	562	184	251	312	574	0	600	305	396	244	305	383	341	106	NA	NA
	Selgy	0	0	0	0	0	0	0	2	1	0	1	1	0	1	3	3	1	0	NA	NA
	TatI	0	0	0	0	0	0	1	1	0	0	2	0	0	0	1	0	0	0	NA	NA
	TatII	0	0	0	0	0	0	1	1	0	0	2	0	0	0	0	0	0	0	NA	NA
	TatIII	0	0	0	0	0	0	1	0	0	0	2	0	0	0	0	0	0	0	NA	NA
	Tcn1	0	0	0	0	0	0	0	0	0	0	0	0	0	0	1	0	0	0	NA	NA
	Tekay	326	432	196	221	203	82	108	145	163	0	206	152	193	159	230	272	413	199	NA	NA
	Gypsy_unknown	3145	2635	3771	3317	3333	1129	2258	3874	3343	1098	3301	3429	3253	2224	4587	4670	4746	1037	NA	NA

## Sheet: LTR_length
		Osaj	Oglu	Opun|Bt	Omal|Bt	Omin|Bt	Orhi	Ooff	Oeic	Opun|Ct	Omal|Ct	Omin|Ct	Oalt|Ct	Ogra|Ct	Oalt|Ct	Oalt|Dt	Ogra|Dt	Olat|Dt	Obra
LTR_Length	chr1	897841	1209883	1246885	1215528	1291080		723494	2490920	1965073		1409568	1589422	1419519	1414475	3501450	3533988	5047667	773555
	chr2	851035	1031903	1625401	1651736	1696810				2025376	1531009		2116559	1535419		1932176	2782198	1652145	572517
	chr3	1154898	1366451	1493813	1392933	1437544	778415	842871	2396891	1942504		2077783	1931777	1645276	1574781	1664213	3318346	1661707	646861
	chr4	1342292	1325550	1213488	1243372	1287056	780510	736475	2047052	1338590		1558356		1559258	1520308	2569423	2581511	2320205	828646
	chr5	1171864	1087948	1493291	1413063	1652720	604348	1002923	2562588	1806143		1688475	1463806	1734756	1245608	1794590	1848331	1900665	305137
	chr6	1048076	1185885	1602857	1469453	1634725	872954	896609				2171883	1647621	1649327		1686017	1776292	820295	1114492
	chr7	1037662	1067623	2145971	1357421	1338159	306529	840525			1336249	1719348	1613952	1599517		1757860	1792685	1636852	429193
	chr8	1537819	1150812	1577644	1256353	1607968	911225	853178	1771225			1520065	1335326	1118555		1658347	1829742	1878015	378998
	chr9	942942		1513029	2438850	2655159	727600	680471	1565728	1358588	1483379	2216231	2691051	1985589	1370273	1618708	2104701	1665608	106214
	chr10	1134387	1253727	1247289	1413725	1445368	706685	929394	2402873	2279085		1675609	1388827	1324278	1129940	1636502	1595778	1628549	712116
	chr11	1202044	1525850	1269521	1380052	1382636	621220	774533	1705097	1570126	1399425	1889389	2247171	1473431	1933028	2090246	2106185	2683207
	chr12	1054591	1059870	1467434	1406704	1390455	256612	714165	1701550	1542940		1602947	1677343	1822869	1643077	1741434	1721924	2144140	372248

## Sheet: Centromere_length
		Osaj	Oglu	Opun|Bt	Omal|Bt	Omin|Bt	Orhi	Ooff	Oeic	Opun|Ct	Omal|Ct	Omin|Ct	Oalt|Ct	Ogra|Ct	Oalt|Ct	Oalt|Dt	Ogra|Dt	Olat|Dt	Obra
centromere_Length	chr1	2433357	2122671	3017543	3062146	3219856		2746746	3201291	4303222		3703503	2685958	2815303	2761115	6259089	5956091	6452191	3416399
	chr2	2177884	2076064	3227340	3427805	3461282				5939726	2873095		3626187	3015034		3352534	5345013	2170899	2513264
	chr3	2038347	2095416	2712200	3469514	3625447	2584823	2588225	2851817	2675277		6484837	3444831	2043615	2025082	3108727	6381866	2328183	2106910
	chr4	2123947	2060925	2407523	4499430	4090057	3660412	2294160	2582997	2358403		3207841		4739016	2195684	3894363	3730908	2881782	3294315
	chr5	2096870	2053370	3049276	4947180	4498349	2666909	2814672	3141838	2340341		2903168	2873012	3756597	2088358	3376347	3427992	2825153	2085260
	chr6	2065434	2023345	3747047	2988641	2819802	3917255	2480460				4591921	3020571	2686459		2629292	3122313	2037129	3354644
	chr7	2319989	2229106	4540406	5476073	3635212	2166574	2794657			2992488	3017693	3423039	3041723		3195227	5574759	2057717	2118039
	chr8	2919415	2070415	3143450	3501159	3340778	3124434	2636868	5514413			3361637	2656146	3220166		2765821	3258717	2403148	2277310
	chr9	2230355		3235433	7468931	5096904	3038051	2156809	2325987	2108733	2932608	4034917	5192554	3192660	2060786	2354545	3792352	2246453	2028733
	chr10	2095452	2153261	2281451	4850748	3337545	4889578	3314883	2878946	3228369		3244475	2509945	3406345	2117398	2954554	2802944	2051645	2052988
	chr11	2283893	2949092	3305893	5397202	3381273	5381067	2602153	2251605	2706697	3485888	4798225	3963203	3525432	2724050	2607557	5164216	3196262
	chr12	2297907	2135346	3243319	4763207	3405393	4120105	2679738	2313889	2363139		3373560	4631269	4961816	2380264	3575885	4348168	3092389	2008650

## Sheet: Centromere location
Centromere location identified by TRF		Chr1	Chr2	Chr3	Chr4	Chr5	Chr6	Chr7	Chr8	Chr9	Chr10	Chr11	Chr12
	Osaj	16700494-17133851	13579273-13757157	19541568-19579915	9756547-9880494	12458466-12555336	15424691-15490125	11961137-12281126	12920734-13840149	2750599-2980954	8099808-8195260	12045599-12329492	11772932-12070839
	Oglu	18710494-18833165	13540064-13616128	21434312-21529728	9723198-9784123	11720260-11773630	15852450-15875795	14428688-14657794	11652205-11722620		8581938-8735199	14403692-15352784	11313119-11448465
	Opun|Bt	18591631-19609174	16014728-17242068	22432103-23144303	12713148-13120671	13980799-15030075	19363360-21110407	12629141-15169547	13958955-15102405	5210776-6446209	10340447-10621898	15200392-16506285	12950738-14194057
	Omal|Bt	19306831-20368977	17425479-18853284	23899075-25368589	11847265-14346695	13161849-16109029	21308817-22297458	14946310-18422383	13884076-15385235	5432846-8114103 && 10247725-10901777	10687793-13538541	15515898-18913100	12753470-15516677
	Omin|Bt	20567141-21786997	17787572-19248854	24445449-26070896	11343986-13434043	14141865-16640214	21424761-22244563	15563818-17199030	14425084-15765862	6815437-9912341	11737074-13074619	15569978-16951251	14103862-15509255
	Orhi			25827604-26412427	15896717-17557129	17522361-18189270	23251408-25168663	37398642-37565216	17016663-18141097	9909413-10947464	8321625-11211203	19892896-23273963	34435290-36555395
	Ooff	27991438-28738184		31017443-31605668	14882640-15176800	17867233-18681905	25581712-26062172	20862938-21657595	25072033-25708901	9650386-9807195	17187274-18502157	22154659-22756812	17551011-18230749
	Oeic	26467272-27668563		30775326-31627143	15729910-16312907	17659685-18801523			19160240-22674653	8528351-8854338	21504376-22383322	24037476-24289081	18370071-18683960
	Opun|Ct	22488353-24791575	27864088-31803814	25918718-26593995	11585962-11944365	14546529-14886870				7563932-7672665	14510548-15738917	17202696-17909393	15370751-15733890
	Omal|Ct	23752128-24960637	19953358-20826453					15396155-16388643		7329424-8262032		17044930-18530818
	Omin|Ct	24873368-26576871		27418163-31903000	14683430-15891271	16041430-16944598	25910459-28502380	16554113-17571806	17534773-18896410	6657072-8691989	16319660-17564135	19517157-22315382	16106309-17479869
	Oalt|Ct	22918514-23604472	16652149-18278336	25499618-26944449		14363921-15236933	18159158-19179729	15099023-16522062	16561283-17217429	6755469-9948023	11937358-12447303	16050802-18014005	11407577-14038846
	Ogra|Ct	20651303-21466606	16707814-17722848	24104451-24148066	12309608-15048624	14610694-16367291	18048379-18734838	14562071-15603794	15678839-16899005	6776092-7968752	11666805-13073150	15358161-16883593	10706811-13668627
	Oalt|Ct	24478189-25239304		29813595-29838677	14520698-14716382	13894320-13982678				7416026-7476812	13241314-13358712	18979851-19703901	15359829-15740093
	Oalt|Dt	20039088-24298177	16471110-17823644	17751998-18860725	8387698-10282061	15526546-16902893	18915574-19544866	14861684-16056911	12539445-13305266	6419682-6774227	7297577-8252131	14807842-15415399	19295593-20871478
	Ogra|Dt	19417763-23373854	17544056-20889069	17776931-22158797	8232015-9962923	15532328-16960320	18343979-19466292	15128154-18702913	13941177-15199894	6343231-8135583	7261633-8064577	13135904-16300120	18522049-20870217
	Olat|Dt	22317568-26769759	18866427-19037326	28387750-28715933	8205845-9087627	17192349-18017502	21166547-21203676	18783503-18841220	11780240-12183388	5635436-5881889	10102896-10154541	15703559-16899821	19597706-20690095
	Oaus
	Obra	12717102-14133501	11522491-12035755	16910761-17017671	4789356-6083671	8845630-8930890	10328274-10365887 &&11674342-11682918	7291385-7409424	8282524-8559834	303953-332686	5968876-6021864		8637671-8646321
	Omey

## Sheet: Gene affected by LTR
gene affected by LTR		Osaj	Oglu	Opun|Bt	Omal|Bt	Omin|Bt	Orhi	Ooff	Oeic	Opun|Ct	Omal|Ct	Omin|Ct	Oalt|Ct	Ogra|Ct	Oalt|Ct	Oalt|Dt	Ogra|Dt	Olat|Dt	Obra
	gene_number	1639	1442	1048	995	967	477	444	564	799	229	734	866	944	588	850	971	722	677
	LTR_number	4726	3552	3036	2798	2858	829	881	1690	2155	601	2210	2319	2737	1615	2631	3060	2099	1714
	all_gene_number	1934	1785	1291	1291	1195	1000	780	770	1135	345	939	1080	1518	705	1049	1513	873	1387
	LTR affect gene/total gene in centromere	0.847466	0.807843	0.811774	0.77072	0.809205	0.477	0.569231	0.732468	0.703965	0.663768	0.781683	0.801852	0.621871	0.834043	0.810296	0.641771	0.827033	0.488104
