# Supplementary material for: Genome Evolution and Diversity of Wild and Cultivated Rice Species
Source: Research Square preprint supplement (doi:10.21203/rs.3.rs-4350570/v1), 2024-05-09
Supplement: Supplementary file 3 [file 52d6692a5fe527c4ba424d21.xlsx]

## Sheet: Wild rice accession information
	Basic information
#ID	Sequencing number	Accession Number	Species	Genome type	Group	Source/Country	Data type
1	W-18	105133	O. alta	CCDD	Wild	Central and Southern America	HiFi/Hi-C/RNA
2	W-26	86535	O. australiensis	EE	Wild	Australia	HiFi/Hi-C/RNA
3	W-59	104157	O. brachyantha	FF	Wild	Africa	HiFi/Hi-C/RNA
4	W-71	105162	O. eichingeri	CC	Wild	Sourth Asia,East Africa	HiFi/Hi-C/RNA
5	W-97	105666	O. glumaepatula	AA	Wild	Central and Southern America	HiFi/Hi-C/RNA
6	W-100	101405	O. grandiglumis	CCDD	Wild	Central and Southern America	HiFi/Hi-C/RNA
7	W-128	105139	O.latifolia	CCDD	Wild	Central and Southern America	HiFi/Hi-C/RNA
8	W-171	80765	O. malampuzhaensis	BBCC	Wild	India	HiFi/Hi-C/RNA
9	W-190	93256	O. minuta	BBCC	Wild	Papua New Guinea	HiFi/Hi-C/RNA
10	W-323	100180	O. officainalis	CC	Wild	Tropical Asia, Tropical Austrialia	HiFi/Hi-C/RNA
11	W-363	105128	O. punctata	BBCC	Wild	Africa	HiFi/Hi-C/RNA
12	W-375	105450	O. rhizomatis	CC	Wild	SriLanka	HiFi/Hi-C/RNA
13	M-6	unknown	O. meyeriana	GG	Wild	China	HiFi/Hi-C/RNA

## Sheet: Sumamary of PacBio data 
Summary of PacBio sequencing data for 13 accessions.
Rice accession	Abbreviation	Total number of base	subreads N90(bp)	Subreads N50 (bp)	Depth(X)
				11674	39.4702
O. alta	Oalt	36323731817	14255	11674	39.4702
O. australiensis	Oaus	33684979685	17233	15178	37.2907
O. brachyantha	Obra	19772212199	15540	13400	71.5658
O. eichingeri	Oeic	28906052350	15355	13177	76.9884
O. glumaepatula	Oglu	8857329157	19802	17631	22.4938
O. grandiglumis	Ogra	20589374280	16023	13332	27.6918
O.latifolia	Olat	39820057262	16505	14441	37.6135
O. malampuzhaensis	Omal	30489018308	15963	13400	31.038
O. minuta	Omin	27577693417	17502	14627	27.0937
O. officinalis	Ooff	17198616358	15422	13845	28.3941
O. punctata	Opun	28915913659	16132	13823	31.248
O. rhizomatis	Orhi	16309508398	15425	11070	27.092
O. meyeriana	Omey	22898547922	15631	13278	30.0852

## Sheet: Summary of HIC data
Summary of HIC sequencing data for 13 accessions
Number	Rice species	Raw_Reads	RAW_Bases	Read_length
W-18	O. alta	195,469,770	58,640,931,000	150
W-26	O. australiensis	133911587	40173476100	150
W-59	O. brachyantha	138,436,714	41,531,014,200	150
W-71	O. eichingeri	133,933,475	40,180,042,500	150
W-97	O. glumaepatula	145433913	43630173900	150
W-100	O. grandiglumis	143,561,168	43068350400	150
W-171	O. malampuzhaensis	141,403,044	42,420,913,200	150
W-190	O. minuta	139281814	41784544200	150
W-323	O. officinalis	144,363,193	43308957900	150
W-363	O. punctata	156,821,813	47,046,543,900	150
W-375	O. rhizomatis	162,161,262	48,648,378,600	150
M-6	O. meyeriana	203,097,632	60,929,289,600	150

## Sheet: Assembly quality assessments
Quality assessments of 33 assemblies.
Accession	BUSCOs assessment
	Completeness (%)	Single_Completeness (%)	Duplicated_Completeness (%)	Fragment (%)	Missing (%)	TotalNumber (%)
O. alta	99.4	12.6	86.8	0.2	0.4	1614
O. australiensis	97.5	96	1.5	1.1	1.4	1614
O. brachyantha	97.2	96	1.2	1.2	1.6	1614
O. rhizomatis	95.2	93.3	1.9	2.2	2.6	1614
O. glumaepatula	95	93.4	1.6	0.9	4.1	1614
O. grandiglumis	99	11.5	87.5	0.4	0.6	1614
O. latifolia	99.2	7.5	91.7	0.3	0.5	1614
O. rhizomatis	99.5	13.3	86.2	0.1	0.4	1614
O. minuta	99	12.4	86.6	0.3	0.7	1614
O. officinalis	96.6	94.1	2.5	0.9	2.5	1614
O. punctata	8.6	8.6	90.7	0.4	0.3	1614
O. eichingeri	97.1	94.7	2.4	1	1.9	1614
O. meyeriana	95.8	92.9	2.9	1.4	2.8	1614

## Sheet: Gene and TE annotation
	Retrotransposons												DNA Trotransposons												Unclassified			Simple tandem repeat
	LTR-Retrotransposons						Non-LTR Retrotransposons
	Ty1/Copia			Gypsy/DIRS1			SINEs			LINEs			Hobo-Activator			Tc1-IS630-Pogo			Tourist/Harbinger			Other
	Count	Size	Ratio	Count	Size	Ratio	Count	Size	Ratio	Count	Size	Ratio	Count	Size	Ratio	Count	Size	Ratio	Count	Size	Ratio	Count	Size	Ratio	Count	Size	Ratio	Count	Size	Ratio
O. meyeriana	36766	32100520	4.22	196041	365912005	48.08	2763	632485	0.08	4887	2504998	0.33	16909	5543269	0.73	37223	6757671	0.89	36650	8311904	1.09	0	0	0	151895	43831171	5.76	69857	3271161	0.43
O. grandiglumis	47376	39269450	4.33	160475	237949248	26.26	4343	584897	0.06	8639	3056216	0.34	19714	4728379	0.52	42379	6551664	0.72	49440	12013637	1.33	79	14843	0	337049	99959756	11.03	142844	35944868	3.97
O. latifolia	50149	44612285	4.21	205022	366606142	34.63	3889	521176	0.05	7881	3450105	0.33	18085	5350590	0.51	44924	6996449	0.66	38231	8404642	0.79	109	14887	0	365723	113699592	10.74	148011	7159461	0.68
O. malampuzhaensis	32469	32383772	3.3	155306	241862819	24.62	4022	528672	0.05	10413	4162575	0.42	23520	7044917	0.72	49374	7710508	0.78	52697	10610769	1.08	0	0	0	401804	161011341	16.39	155405	7645163	0.78
O. alta	42039	39288806	4.27	172179	254423459	27.65	5319	769964	0.08	8036	3094552	0.34	19769	6164282	0.67	43079	6947502	0.75	49521	11372564	1.24	112	9727	0	345498	109766224	11.93	140491	6652874	0.72
O. minuta	35497	36378820	3.57	166704	251034575	24.66	5560	806499	0.08	10164	3300962	0.32	21141	7531315	0.74	48958	7571520	0.74	43313	8031351	0.79	0	0	0	406379	137018292	13.46	153356	7426307	0.73
O. australiensis	45819	97826880	10.83	170948	379530062	42.02	2380	392781	0.04	12318	9178002	1.02	27495	10802876	1.2	16242	2655452	0.29	26157	4631654	0.51	0	0	0	263934	107250872	11.87	92113	4401738	0.49
O. officinalis	18059	17238047	2.85	103242	196151065	32.38	2146	299081	0.05	6353	3295428	0.54	11144	3577319	0.59	28987	4634024	0.77	31719	6045313	1	52	6218	0	209480	67065505	11.07	83156	4051972	0.67
O. punctata	33759	33448385	3.61	151406	223130823	24.11	6663	1010518	0.11	11714	3949709	0.43	21405	5308057	0.57	49536	7928256	0.86	47954	9412489	1.02	85	10031	0	384733	133000947	14.37	155447	7497053	0.81
O. rhizomatis	24082	27081983	4.5	106432	196370157	32.62	2136	273519	0.05	5829	2130216	0.35	10091	3107980	0.52	28794	4633475	0.77	22175	4676958	0.78	0	0	0	212601	69132305	11.48	81068	3860329	0.64
O. brachyantha	9274	6423280	2.32	20163	25249671	9.14	2009	279691	0.1	3834	992445	0.36	15940	3779748	1.37	50243	7854811	2.84	58831	12810142	4.64	0	0	0	102628	16908175	6.12	69679	3277758	1.19
O. eichingeri	21376	19266924	3.52	88371	148478716	27.14	1624	215466	0.04	6961	2096661	0.38	10651	2679162	0.49	30199	4724204	0.86	25489	5057254	0.92	0	0	0	199150	64833789	11.85	81594	4020526	0.73
O. glumaepatula	8375	6175892	1.57	36971	81825896	20.78	3369	479402	0.12	6433	1775369	0.45	8149	1740952	0.44	34833	5407887	1.37	37157	6828769	1.73	44	4707	0	216095	71103105	18.06	89641	4403427	1.12

## Sheet: RNA-seq for annotation 
	RNA sequencing
	Roots			Leaves			Stems			Panicle
	Reads	Base(GB)	mapped	Reads	Base(GB)	mapped	Reads	Base(GB)	mapped	Reads	Base(GB)	mapped
O. alta	26642082	7992624600	92.26	30750346	9225103800	92.09	25793110	7737933000	90.92	28852122	8655636600	87.88
	26342087	7902626100	91.99	35280829	10584248700	89.19	23365933	7009779900	91.35	31598790	9479637000	88.79
	28436355	8530906500	90.94	28198909	8459672700	91.93	27294201	8188260300	91.85	20935344	6280603200	86.58
O. australiensis	25902358	7770707400	91.85	33794564	10138369200	91.36	32143742	9643122600	89.01	25358828	7607648400	90.17
	28633353	8590005900	89.08	30533826	9160147800	91.13	29330978	8799293400	89.3	23346516	7003954800	91.2
				31200408	9360122400	90.93	36856801	11057040300	89.09	20460444	6138133200	91.28
O. brachyantha	32394891	9718467300	69.84	24746027	7423808100	75.85	22247837	6674351100	75.35	28303818	8491145400	74.87
	35038025	10511407500	72.38	20473511	6142053300	74.7	28963111	8688933300	73.93	25323897	7597169100	75.18
	30986386	9295915800	71.21	23156493	6946947900	74.61	32899391	9869817300	75.31	30114675	9034402500	74.26
O. rhizomatis	25793120	7737936000	76.45	22339160	6701748000	91.21	36358215	10907464500	91.96	27408849	8222654700	93.27
	27024598	8107379400	54.84	19243441	5773032300	91.48	34694314	10408294200	90.79	29853173	8955951900	93.52
	20908714	6272614200	67.11	18607689	5582306700	91.3	21507101	6452130300	90.99	34864642	10459392600	93.5
O. glumaepatula	30021382	9006414600	97.35	26637113	7991133900	97.91	30337556	9101266800	98.37	19377698	5813309400	97.84
	20052449	6015734700	79.82	22856861	6857058300	98.13	35845559	10753667700	98.17	20292267	6087680100	97.5
				28643765	8593129500	97.55	28432544	8529763200	98	22794013	6838203900	97.9
O. grandiglumis	25954666	7786399800	77.48	31483011	9444903300	91.99	23516801	7055040300	90.75	34247624	10274287200	92.72
	23193759	6958127700	66.61	29758475	8927542500	91.64	24483564	7345069200	91.4	33202955	9960886500	92.68
	29849675	8954902500	80.1	27505272	8251581600	89.41	33147825	9944347500	88.66	31608860	9482658000	92.52
O.latifolia	27880645	8364193500	91.73	23321097	6996329100	91.15	29482314	8844694200	91.05	39783520	11935056000	92.28
	32323047	9696914100	87.36	28651630	8595489000	91.85	24501669	7350500700	89.82	26079646	7823893800	90.8
	44941292	13482387600	92.73	25185295	7555588500	92.69	23928451	7178535300	90.73	27008258	8102477400	92.53
O. malampuzhaensis	33098194	9929458200	89.85	30165221	9049566300	90.62	30985204	9295561200	90.54	27461295	8238388500	92.65
	29552287	8865686100	66.72	26328699	7898609700	91.84	31895268	9568580400	85.17	34239050	10271715000	92.17
	25940833	7782249900	90.87	28327777	8498333100	88.84	23705179	7111553700	91.47	28282028	8484608400	92.77
O. minuta	21641108	6492332400	85.19	18674549	5602364700	91.49	27846735	8354020500	88.29	25389975	7616992500	92.68
	27641912	8292573600	93.3	18821883	5646564900	91.52	30637995	9191398500	91.85	24167521	7250256300	92.11
	21459672	6437901600	92.19	22403672	6721101600	91.82	27127434	8138230200	91.17	31669494	9500848200	91.88
O. officinalis	24508362	7352508600	91.36	25312184	7593655200	91.77	29789735	8936920500	92.64	31098387	9329516100	91.48
	23158140	6947442000	91.45	31108524	9332557200	91.69	30388415	9116524500	92.59	27394738	8218421400	91.24
	22154060	6646218000	92.45	27673235	8301970500	92.07	27097679	8129303700	92.36	27892571	8367771300	91.71
O. punctata	21672623	6501786900	91.98	22303923	6691176900	90.95	28150725	8445217500	91.05	26228558	7868567400	91.64
	29689133	8906739900	91.36	23802585	7140775500	91.4	22176231	6652869300	92.04	28288640	8486592000	92.4
	22649798	6794939400	85.74	20522189	6156656700	91.55	27932211	8379663300	92.58	20447641	6134292300	92.94
O. eichingeri	28333192	8499957600	78.8	23694284	7108285200	91.59	30136796	9041038800	85.32	25273533	7582059900	92.09
	21934427	6580328100	91.39	26869961	8060988300	90.51	35074600	10522380000	91.05	23287138	6986141400	91.85
	22559866	6767959800	88.97	25582357	7674707100	88.42	25970473	7791141900	91.51	24771568	7431470400	91.81
O. meyeriana	33672426	10101727800	66.48

## Sheet: Annotated gene number
The expressed gene number of the wild rice assemblies
Species	Leaf-1	Leaf-2	Leaf-3	Root-1	Root-2	Root-3	Spikelet-1	Spikelet-2	Spikelet-3	Stem-1	Stem-2	Stem-3	Total
O. alta	47870	43701	48299	52609	53875	55024	60839	59970	58891	52046	49910	49871	70277
O. australiensis	25730	25156	25069	27696	26987	27222		28683	28799	26502	26393	26179	33756
O. brachyantha	24811	24607	25343	26138	26463	26161	27921	27571	27656	25308	26211	26667	32523
O. eichingeri	26291	21791	22417	28301	27616	27149	28173	28387	29205		29304	27358	33763
O. glumaepatula	28867	28102	28305	28170	24629		24842	28425	28857	26177	26300	26067	35546
O. grandiglumis	49484	49166	48734	51425	54950	54762	55653	55662	56310	54424	51943	54415	67710
O. latifolia	49729	50837	47970	53540	55112	54304	58411	54227	56222	53454	51437	50032	68054
O. malampuzhaensis	52197	49758	52378	57126	55070	56832	58437	59974	57946	57089	55935	54686	70949
O. minuta	51526	52078	50683	54545	54681	55453	57431	59150	59811	49243	55777	54045	71014
O. officinalis	28045	27783	27853	26667	29621	28864	30124	31277	29712	24439	25436	23776	37440
O. punctata	48686	51071	49549	54106	55351	51056	56351	56756	54535	51422	52443	54415	67976
O. rhizomatis	27193	27396	28169	34042	29527	29816	31082	31232	32329	28779	30146	29696	39123
O. meyeriana				29857									29857

## Sheet: Cultivated rice used for SVs
Full name	Abbreviation	subspecies
02428	02428	Oryza sativa L. ssp japonica
Zhonghua11	ZH11	Oryza sativa L. ssp japonica
Kongyu131	KY131	Oryza sativa L. ssp japonica
Nipponbare	NIP	Oryza sativa L. ssp japonica
Lemont	Lemont	Oryza sativa L. ssp japonica
Lijiang Xintuan Hei Gu	LJ	Oryza sativa L. ssp japonica
Chuannong1	CN1	Oryza sativa L. ssp indica
D62	D62	Oryza sativa L. ssp indica
II32	Ⅱ32	Oryza sativa L. ssp indica
9311	9311	Oryza sativa L. ssp indica
J4155	J4155	Oryza sativa L. ssp indica
Guang8	G8	Oryza sativa L. ssp indica
Yihui3551	Y3551	Oryza sativa L. ssp japonica
IR64	IR64	Oryza sativa L. ssp indica
R498	R498	Oryza sativa L. ssp indica
Tumba	TUMBA	Oryza sativa L. ssp indica
Nagina22	N22	Oryza sativa L. ssp indica
Basmati1	Basmati1	Oryza sativa L. ssp indica
CG14	CG14	Oryza glaberima
