# Supplementary material for: Genome Evolution and Diversity of Wild and Cultivated Rice Species
Source: Research Square preprint supplement (doi:10.21203/rs.3.rs-4350570/v1), 2024-05-09
Supplement: Supplementary file 4 [file 569d57b5052b149eb4c52a85.xlsx]

## Sheet: Gene CNV with traits
87 gene CNVs associated with important agronomic traits were identified
Gene_ID	Symbol
OsNipG0100091300.01.T01	MAK1
OsNipG0100182200.01.T01	OsBBPI
OsNipG0100201000.01.T01	OsLPR3
OsNipG0100202000.01.T01	OsLPR5
OsNipG0100265700.01.T01	Oshsp16.9
OsNipG0100887800.01.T01	OsESG1
OsNipG0100887900.01.T01	SDRLK-47
OsNipG0101211300.01.T01	NBS-LRR
OsNipG0101416000.01.T01	OsPOD|prx11
OsNipG0103622200.01.T01	Ospdr9|OsABCG36
OsNipG0104094600.01.T01	SDRLK-1
OsNipG0180848900.01.t1	SDRLK-12
OsNipG0104103000.01.T01	OsLSK1
OsNipG0104118800.01.T01	SDRLK-13
OsNipG0104321900.01.T01	OsMAPKKK63
OsNipG0104324100.01.T01	OsMAPKKK55|OsMKKK55
OsNipG0104325800.01.T01	OsMKKK70
OsNipG0104327200.01.T01	OsNPK1-PK|OsMAPKKK62|OsMKKK62
OsNipG0104342300.01.T01	SLB2
OsNipG0180958300.01.t1	OsUGT706D1
OsNipG0104893900.01.T02	SDS2
OsNipG0104894900.01.T01	SDRLK-15
OsNipG0104954900.01.T01	RSP1
OsNipG0105160500.01.T01	OsWRKY22
OsNipG0105369100.01.T01	OsAKR1|OsI_04426
OsNipG0105369700.01.T01	OsI_04429|OsAKR3
OsNipG0105577200.01.T01	SDRLK-16
OsNipG0105709300.01.T01	SDRLK-19
OsNipG0105960200.01.T01	OsGT47A
OsNipG0105961000.01.T01	OsIRX10
OsNipG0106038300.01.T01	Gns6
OsNipG0106159400.01.T01	OsMSR2
OsNipG0180848900.01.t1	SDRLK-12
OsNipG0106080200.01.T01	OsGLN2
OsNipG0206859500.01.T02	OsCYP71D8L
OsNipG0207061100.01.T01	OsGIRL1
OsNipG0207254100.01.T01	OsPrx30
OsNipG0207319000.01.T01	GluD
OsNipG0207495500.01.T01	GluB5
OsNipG0208027900.01.T01	OsGT61-1|XAX1
OsNipG0209180200.01.T01	XIK1
OsNipG0209280100.01.T01	CYP76M8
OsNipG0209389200.01.T02	OsHIPP16
OsNipG0209716800.01.T01	OsPAL
OsNipG0209917900.01.T01	OsDREB4-1|CR223
OsNipG0209923700.01.T01	ARAG1
OsNipG0210588600.01.T01	UGT85E1
OsNipG0210597700.01.T01	OsPHI-1
OsNipG0210940700.01.T01	OsCCR10
OsNipG0311069700.01.T03	Ltp1
OsNipG0311070700.01.T01	qLTG3-1
OsNipG0311261800.01.T01	OsACS
OsNipG0311300300.01.T01	CYP96B5|WSL5
OsNipG0311363700.01.T01	OsPht1;12|OsPT12
OsNipG0311530600.01.T01	OsJAZ9|OsTIFY11a
OsNipG0311532100.01.T01	OsJAZ11
OsNipG0311533900.01.T01	OsJAZ10
OsNipG0311544400.01.T01	OsEBP-89|OsEBP89
OsNipG0311544800.01.T01	OsRAF|OsLG3|OsSTAP1
OsNipG0311870600.01.T01	POXN|prx38
OsNipG0312192800.01.T01	OsGSTL2
OsNipG0312330300.01.T01	OsNAS1
OsNipG0313191100.01.T01	BC1
OsNipG0313736600.01.T01	PEZ1
OsNipG0314467800.01.T01	OsLP|PR-5
OsNipG0314696600.01.T01	OsOXO4
OsNipG0315326200.01.T01	OsiSAP7
OsNipG0315354400.01.T01	OsIGL|OsIgl
OsNipG0315484500.01.T01	ZFP182|ZOS3-21
OsNipG0315485100.01.T01	ZFP15
OsNipG0315485300.01.T02	OsADF3
OsNipG0315541000.01.T01	OsFWL4
OsNipG0416504500.01.T01	OsPht1;4|OsPT4
OsNipG0416507500.01.T01	OsPht1;13|OsPT13
OsNipG0416669800.01.T01	OslecRK|OsLecRK1
OsNipG0416672800.01.T01	OsLecRK3
OsNipG0416696100.01.T01	UGT74J1
OsNipG0418068800.01.T01	OsTPS20
OsNipG0418606000.01.T01	Pi21
OsNipG0418728500.01.T02	SDRLK-51
OsNipG0418730700.01.T01	SDRLK-26
OsNipG0418953900.01.T01	OsMST1
OsNipG0418996500.01.T01	OsATL14
OsNipG0419052200.01.T01	OsHIPP19
OsNipG0419087600.01.T02	Os4BGlu12
OsNipG0419378000.01.T02	OsYSL13
OsNipG0419379500.01.T01	OsYSL12
OsNipG0419519800.01.T01	OsERF1
OsNipG0419538300.01.T01	OsDREB4-2|CR250|OsAP2
OsNipG0419570300.01.T01	OsR3L1
OsNipG0419581600.01.T01	cZOGT1
OsNipG0419589600.01.T01	Kala4|OsS1
OsNipG0419814300.01.T01	OsABCC7
OsNipG0419875300.01.T01	OsPTR6|PTR6|OsNPF7.3
OsNipG0419964700.01.T02	KS2|OsKS2|OsKSL2
OsNipG0420037100.01.T01	BH1
OsNipG0420085400.01.T01	SDK6
OsNipG0420092700.01.T01	SDK14
OsNipG0420093000.01.T01	SDK9
OsNipG0420093200.01.T01	SDRLK-31
OsNipG0420093600.01.T01	SDRLK-32
OsNipG0420097400.01.T02	SDK10
OsNipG0420097800.01.T02	OsRLCK166
OsNipG0420229100.01.T01	OsRLCK168
OsNipG0520479100.01.T01	OsPGIP2
OsNipG0520479500.01.T02	OsPGIP4
OsNipG0520892100.01.T01	OsCRSH2
OsNipG0520893700.01.T01	OsCRSH3
OsNipG0521330500.01.T01	MHZ11
OsNipG0521637200.01.T01	OsHI-XIP
OsNipG0523072500.01.T01	Cht-2
OsNipG0523076300.01.T01	CHIA1;175
OsNipG0523094100.01.T01	OsBphi262
OsNipG0523635100.01.T01	OsCG5
OsNipG0523650800.01.T01	OsCam2
OsNipG0625632300.01.T01	Pi9|Piz-t|Pi2
OsNipG0625707100.01.T01	OsCTF
OsNipG0625923800.01.T01	OsPht1;10|OsPT10
OsNipG0627527200.01.T01	OsPLDalpha4
OsNipG0627675400.01.T01	TGW6|OsTGW6
OsNipG0628125800.01.T01	OsRLCK214
OsNipG0628128000.01.T02	OsRLCK215
OsNipG0628258500.01.T01	OsPTR9|OsNPF8.20
OsNipG0628367300.01.T01	RC24
OsNipG0728587100.01.T01	OsPR1a|OsSCP
OsNipG0729202400.01.T01	RAG1
OsNipG0729203200.01.T01	RAG2
OsNipG0730501100.01.T01	OsPIP2;1
OsNipG0731121100.01.T01	CYP716A16
OsNipG0731239900.01.T01	Gnk2RLK-4
OsNipG0731292700.01.T01	CRK6
OsNipG0731294000.01.T02	CRK10
OsNipG0731511100.01.T01	OsSUMO3
OsNipG0731585600.01.T01	AChE
OsNipG0731875900.01.T01	OsRNS1
OsNipG0731922500.01.T01	Os1-CysPrxB
OsNipG0732171300.01.T01	POX8.1|prx110
OsNipG0732171900.01.T01	POX22.3
OsNipG0732172300.01.T01	POX5.1|prx113
OsNipG0732173300.01.T01	POX3006|prx114
OsNipG0787051700.01.t1	OsFAD2-3
OsNipG0731002100.01.T01	UGT707A3
OsNipG0832644500.01.T01	OsNIP3;2
OsNipG0832645700.01.T01	OsNIP3;3
OsNipG0832925900.01.T01	OsGER1
OsNipG0834594000.01.T01	OsZAS1c
OsNipG0834857700.01.T01	S28
OsNipG0835279000.01.T01	OsGLP1
OsNipG0835554400.01.T01	OsWAK74
OsNipG0937437700.01.T01	OsFBX322
OsNipG0937532600.01.T01	OsSIRK1
OsNipG0938196700.01.T01	EP
OsNipG0938625800.01.T01	Os9BGlu31
OsNipG0938652500.01.T01	OsSGT1
OsNipG0938678200.01.T01	OsDREB1B
OsNipG0938679400.01.T01	OsDREB1A|OsDREBL|OsCBF3
OsNipG0938819500.01.T01	OsSAUR45
OsNipG0938843600.01.T01	SDRLP-7
OsNipG0938844400.01.T01	SDRLK-46
OsNipG0938846800.01.T01	SDK11
OsNipG0938847200.01.T01	SDK1
OsNipG0938906500.01.T01	OsDEES1|OsWAK91
OsNipG0938923200.01.T01	OsCRP1
OsNipG1039051700.01.T01	OsACE1
OsNipG1039190600.01.T01	OsADF
OsNipG1040670200.01.T01	OsRCCR1
OsNipG1040692200.01.T01	OsJAZ13
OsNipG1040700400.01.T01	OsJAZ12|OsTIFY11d
OsNipG1041493400.01.T01	OsLTPL159
OsNipG1041636900.01.T01	Osgstu3
OsNipG1041689700.01.T01	OsAP77
OsNipG1041801200.01.T01	OsEXPB2
OsNipG1041803400.01.T01	OsEXPB3
OsNipG1041879300.01.T01	Rir1b
OsNipG1142127100.01.T01	SDRLK-8
OsNipG1142137800.01.T01	TOM1|OsZIFL4
OsNipG1142367100.01.T01	Hwi1
OsNipG1142732200.01.T01	Os11gRGA4
OsNipG1142734500.01.T01	Os11gRGA5
OsNipG1142779100.01.T01	RPR1
OsNipG1144367700.01.T01	SS1|ONAC025
OsNipG1144368700.01.T01	ONAC127
OsNipG1144370300.01.T01	ONAC128
OsNipG1144381600.01.T01	ST01
OsNipG1144383400.01.T01	OsBDG1
OsNipG1144493600.01.T01	CHS|OsCHS1
OsNipG1144683500.01.T01	xa21
OsNipG1145631000.01.T01	Xa47
OsNipG1145639700.01.T01	OsWAK1
OsNipG1145723900.01.T01	riceXIP
OsNipG1245845800.01.T02	OsWRKY89
OsNipG1245926600.01.T01	SDRLP-6
OsNipG1245941600.01.T01	TOM2
OsNipG1245944600.01.T02	TOM3
OsNipG1246362800.01.T01	OsSGS3
OsNipG1246456900.01.T01	OsGSTZ2
OsNipG1246737300.01.T01	OsKIX_11
OsNipG1248208000.01.T01	OsUPS1
OsNipG1248659700.01.T01	RSOsPR10|OsPBZ14
OsNipG1248660500.01.T01	OsPBZ15
OsNipG1248661300.01.T01	OsPR10b|OsPBZc
OsNipG1248661700.01.T01	OsPBZ19
OsNipG1248765700.01.T01	OsMT1g
OsNipG1248765900.01.T01	OsMT1f
OsNipG1249252400.01.T03	OsPAP10c
OsNipG1249269900.01.T01	MAK11
OsNipG1245929800.01.T01	SDK3

## Sheet: R gene number
The number of R gene identified within Oryza genus
Species	R gene number
O. glaberrima	419
O. meyeriana	238
O. sativa japonica	473
O. sativa indica	511
O. rufipogon	260
O. grandigumis|Ct	224
O. grandigumis|Dt	183
O. latifolia|Ct	314
O. latifolia|Dt	206
O. malampuzhaensis|Bt	302
O. malampuzhaensis|Ct	277
O. alta|Ct	260
O. alta|Dt	216
O. minuta|Bt	258
O. minuta|Ct	336
O. australiensis	195
O. officinalis	356
O. punctata|Bt	320
O. punctata|Ct	349
O. rhizomatis	343
O. branchyantha	245
O. eichingeri	288
O. glumaepatula	354
Z. may	117

## Sheet: R gene cluster
The cluster of R genes within Oryza genus
O. sativa japonica	O. sativa indica	O. glaberrima	O. rufipogon	O. glumaepatula	O. malampuzhaensis|Bt	O. malampuzhaensis|Ct	O. minuta|Bt	O. minuta|Ct	O. punctata|Bt	O. punctata|Ct	O. grandigumis|Ct	O. grandigumis|Dt	O. latifolia|Ct	O. latifolia|Dt	O. alta|Ct	O. alta|Dt	O. officinalis	O. rhizomatis	O. eichingeri	O. australiensis	O. brachyantha	O. meyeriana
15	8	12	8	10	11	6	8	5	7	10	5	2	6	5	7	5	6	8	3	0	2	4
2	2	1	1	1	2	0	2	1	1	1	1	0	1	0	1	0	1	1	1	1	1	0
1	1	1	1	1	1	0	1	0	1	0	0	1	0	1	0	1	0	0	0	1	0	0
2	3	2	1	2	2	2	2	2	3	2	1	0	1	1	1	2	2	2	2	0	1	1
0	1	1	1	1	0	0	0	1	0	1	1	1	1	1	1	1	1	1	1	1	1	0
93	100	86	45	67	44	46	38	48	45	56	37	25	46	32	37	28	61	64	51	30	39	38
1	1	1	1	1	1	1	1	1	1	1	0	1	1	1	0	1	1	1	1	1	1	1
0	1	1	0	1	0	1	1	1	1	0	0	1	1	1	0	1	2	2	1	1	0	1
12	10	6	3	5	6	3	4	5	5	6	2	0	5	1	4	1	4	5	4	3	3	2
1	2	2	1	0	0	0	0	0	1	0	0	1	0	1	0	1	0	0	0	1	1	0
3	3	3	1	2	1	0	1	0	1	0	0	2	0	3	0	3	0	0	0	0	1	0
8	11	10	7	11	5	5	6	9	8	7	6	3	10	4	9	6	8	10	5	4	5	8
1	1	1	0	1	0	1	0	1	0	0	0	1	1	0	0	1	0	0	1	0	0	0
5	6	5	2	2	2	7	1	4	3	4	5	1	4	2	4	1	3	4	3	2	4	3
6	8	6	0	3	4	4	3	6	4	4	5	1	3	2	5	3	4	2	2	2	3	4
1	1	1	1	1	1	1	1	1	1	1	1	1	1	1	1	1	1	1	1	1	1	1
6	5	4	3	5	4	3	3	2	5	4	3	0	4	1	4	1	4	2	0	2	1	3
2	2	2	2	1	1	2	1	2	1	1	1	1	1	1	1	1	2	1	2	1	2	1
1	1	1	1	0	1	1	1	1	1	1	0	0	1	1	1	1	1	1	0	1	0	0
1	1	1	1	1	1	2	1	1	1	2	0	1	1	1	1	1	2	1	2	1	0	0
3	1	3	1	2	0	2	3	1	3	0	1	0	1	2	0	1	0	0	2	1	0	1
1	1	1	1	1	1	1	1	1	1	1	1	1	1	1	1	1	1	1	1	1	1	1
2	2	3	0	3	2	1	1	1	0	2	0	1	2	1	0	1	1	2	1	1	2	1
1	1	1	1	1	0	1	0	2	2	1	1	1	2	1	1	1	0	1	1	0	1	1
9	15	7	1	6	5	8	4	12	8	6	3	0	8	0	5	0	6	7	3	3	3	3
2	2	2	2	2	2	2	1	1	2	2	1	2	1	1	2	2	2	2	2	2	2	1
1	1	1	1	1	1	1	1	1	1	1	1	1	1	1	1	1	1	1	1	1	1	2
12	14	10	5	5	5	3	3	3	3	3	0	4	3	3	2	4	2	3	1	4	2	3
7	6	5	5	7	4	1	4	1	4	3	3	4	4	4	3	5	2	3	3	1	1	2
7	4	6	2	6	2	1	3	0	2	5	1	1	3	1	3	2	2	2	3	1	2	4
1	1	1	1	1	1	1	1	1	1	1	0	1	1	1	0	1	1	1	1	1	1	1
3	2	4	1	2	1	1	1	1	1	1	0	1	1	5	1	1	1	1	1	1	1	0
1	1	1	0	0	1	1	1	0	1	0	0	0	1	0	1	0	1	0	0	0	0	1
1	0	1	1	1	0	0	0	0	2	0	0	0	0	0	0	0	0	0	0	0	0	0
6	13	5	5	6	3	3	2	3	6	5	4	2	6	1	10	3	2	5	10	1	1	8
1	1	1	1	1	1	1	1	1	1	1	2	0	1	1	2	0	0	1	1	1	1	1
1	1	1	1	1	1	1	1	1	1	1	1	0	1	1	1	1	1	1	1	1	1	1
2	2	2	2	3	2	2	2	1	2	2	2	1	2	1	2	1	2	2	2	0	1	2
0	1	1	0	1	1	1	1	1	1	1	1	1	1	1	1	1	1	1	1	1	1	0
2	2	2	2	2	2	2	1	2	1	2	0	2	3	2	1	2	2	2	2	1	3	1
1	1	1	1	1	0	0	0	0	0	0	0	0	0	0	0	1	0	0	0	0	0	0
9	10	8	9	7	8	8	9	8	7	7	9	7	7	7	11	7	9	7	8	2	7	8
2	2	2	2	2	0	1	0	1	1	1	1	0	2	0	1	0	1	2	0	0	1	0
1	1	1	1	1	1	1	1	1	1	1	2	0	1	1	2	0	1	1	1	0	1	2
1	3	3	1	3	2	1	0	3	2	2	0	2	2	1	0	2	0	2	2	2	2	0
1	1	1	0	0	0	0	0	0	1	0	0	0	0	0	0	0	0	0	0	0	0	0
1	1	1	0	0	0	0	0	0	1	0	0	0	0	0	0	0	0	0	0	0	0	0
1	0	1	0	1	0	0	0	0	0	0	0	0	0	1	0	2	0	1	0	0	1	0
3	2	3	1	3	1	2	1	3	1	1	1	1	1	1	1	2	2	2	2	1	1	1
1	1	1	1	0	0	0	0	0	0	0	0	1	1	1	0	0	0	1	0	0	0	0
2	2	1	1	1	1	0	0	1	1	1	0	0	0	0	0	0	2	1	1	0	0	1
15	10	5	5	9	7	8	5	8	5	5	6	7	9	4	9	7	11	9	9	6	7	3
1	1	1	1	1	1	0	1	1	1	1	0	0	2	1	1	0	1	0	1	1	0	0
1	1	1	1	1	1	1	1	1	1	1	1	1	1	1	1	1	1	1	1	0	1	0
2	1	1	3	2	1	1	1	1	0	2	0	2	2	2	2	2	2	1	2	2	2	1
0	0	3	0	0	2	2	1	0	2	0	0	0	0	0	0	0	0	2	0	0	0	0
1	1	1	1	1	1	0	1	0	1	3	1	1	1	1	1	1	2	1	1	1	1	1
1	1	1	1	1	1	0	1	0	1	1	1	1	1	1	1	1	2	0	1	1	1	1
11	10	11	7	7	5	8	2	7	12	7	3	2	4	4	2	3	4	5	4	4	4	5
2	2	2	0	1	2	0	2	2	2	1	1	1	1	1	1	1	3	1	2	1	1	1
6	10	5	1	3	4	3	4	8	6	8	3	1	7	5	4	4	7	5	6	1	3	8
1	1	1	0	0	1	0	1	1	1	1	1	1	1	1	1	0	0	1	1	1	1	1
1	1	1	1	1	1	0	1	0	1	0	0	0	1	1	1	1	0	1	1	1	1	0
3	3	1	0	2	3	1	0	3	1	1	3	2	2	1	1	2	3	2	1	0	1	1
1	1	1	1	1	0	0	1	2	1	3	1	1	2	1	1	1	2	0	1	1	0	0
4	6	5	1	4	6	0	7	3	5	3	1	4	4	2	2	3	3	3	1	1	2	3
0	1	1	0	1	0	0	0	0	0	0	0	0	0	0	0	0	0	0	0	0	0	0
1	1	1	0	1	1	0	1	1	1	1	1	0	1	1	1	1	1	1	1	1	1	0
7	11	3	1	2	5	4	3	5	3	9	4	3	4	3	4	3	5	5	7	4	3	0
1	1	1	0	2	1	0	1	1	2	2	0	0	2	1	2	0	0	0	2	0	0	0
1	2	1	1	1	1	1	1	2	1	2	1	0	1	0	1	0	1	1	2	0	0	0
1	1	1	1	1	1	1	1	2	1	1	1	1	1	0	1	1	1	1	1	1	1	1
1	1	1	1	1	1	1	1	1	1	1	1	1	1	1	1	1	1	1	1	1	1	1
1	1	1	1	1	0	1	0	1	0	0	0	1	1	1	0	1	1	1	1	1	0	0
1	1	2	0	1	2	0	1	2	2	1	0	0	0	0	0	0	2	1	0	0	1	0
1	1	1	0	0	1	0	1	1	1	0	0	0	0	0	0	0	1	0	0	0	0	0
1	1	1	0	1	0	0	0	1	0	0	0	0	0	0	0	0	2	1	1	0	1	1
1	1	1	1	1	1	1	1	1	1	1	1	1	1	1	1	1	1	1	1	1	1	1
0	1	1	1	1	0	0	0	1	0	2	1	0	0	1	1	1	1	2	1	1	0	0
0	0	1	0	0	0	0	0	0	0	0	0	0	0	0	0	0	0	0	0	0	0	0
1	1	1	1	1	1	1	1	1	1	1	1	1	1	1	1	1	1	1	1	1	1	1
1	1	1	0	1	1	0	1	1	1	1	1	0	1	0	1	0	1	1	0	0	2	0
12	14	11	4	8	4	2	1	7	3	5	3	10	4	4	3	9	11	5	3	5	8	9
3	3	3	1	3	2	2	1	3	2	2	2	3	2	0	2	3	2	2	2	4	2	2
4	4	6	4	6	5	2	1	3	4	5	0	1	6	1	2	0	2	4	2	1	4	2
1	1	1	1	1	1	0	1	1	1	1	2	0	1	0	1	0	1	1	1	0	0	0
1	2	1	1	0	1	1	1	1	1	1	1	0	1	0	1	0	1	0	1	0	0	0
1	1	1	2	1	1	0	2	2	2	2	2	0	1	1	2	1	2	2	2	0	0	0
1	1	1	0	0	1	0	1	0	1	0	2	0	0	0	1	0	0	0	0	0	0	0
1	1	1	0	1	1	0	0	0	0	0	0	1	0	1	0	1	0	0	0	0	0	0
2	2	2	2	2	2	1	2	2	2	2	2	1	2	1	2	1	2	2	2	2	1	2
0	1	1	0	0	0	0	0	0	0	0	0	0	0	0	0	0	0	0	0	0	0	0
0	1	1	1	1	1	0	1	0	1	0	2	0	2	0	1	0	0	0	1	0	1	0
1	1	1	1	1	1	0	1	0	1	0	0	1	0	1	0	1	0	0	0	1	1	1
1	1	1	0	1	1	0	1	0	1	0	0	1	0	1	0	1	0	0	0	1	1	1
1	0	2	0	1	2	1	2	1	2	1	0	1	1	0	0	1	1	0	1	0	1	1
1	1	1	1	1	0	0	0	0	0	0	0	0	0	0	0	0	0	0	0	0	0	0
1	1	1	0	1	1	0	1	0	1	0	0	1	0	0	0	1	0	0	1	0	1	1
1	1	1	0	1	1	0	1	0	1	0	0	1	0	0	0	1	0	0	1	0	1	1
0	0	1	1	0	1	0	1	1	1	0	1	0	1	1	0	0	1	0	0	0	0	0
1	1	1	1	1	1	1	1	0	1	1	1	0	1	0	1	0	0	1	0	1	0	0
3	3	5	1	1	2	1	1	4	2	3	1	2	3	2	0	2	1	3	0	1	2	1
2	3	3	2	2	1	1	1	2	2	1	2	1	2	2	2	1	1	2	1	2	2	2
2	3	1	0	1	1	0	1	0	1	0	0	1	0	1	0	1	2	0	0	0	1	1
1	3	1	3	2	3	3	3	3	4	3	3	3	3	3	3	3	3	3	3	2	3	2
1	1	1	1	1	1	1	1	1	1	0	1	0	1	0	1	0	1	1	1	0	1	1
6	5	5	3	6	2	3	2	5	3	4	5	1	7	1	7	1	5	5	3	2	4	6
5	5	5	5	2	3	6	2	6	2	4	2	2	3	2	4	2	5	5	4	3	3	4
0	1	1	1	0	0	0	0	0	0	0	0	0	0	0	0	0	0	0	0	0	0	0
1	0	1	0	0	0	0	0	0	0	0	0	0	0	0	0	0	0	0	0	0	0	0
1	1	1	1	0	2	1	1	1	1	1	1	1	1	1	1	1	1	1	1	1	1	1
0	0	1	0	1	1	1	1	1	2	1	0	0	0	1	0	1	1	1	1	0	0	0
2	3	2	0	1	3	2	4	2	3	2	3	1	3	1	2	2	1	2	0	3	3	3
1	0	1	1	0	1	1	1	1	0	1	1	0	1	0	0	0	1	1	0	0	0	1
0	0	1	0	0	0	0	0	0	0	0	0	0	0	0	0	0	0	0	0	0	0	0
1	1	1	0	0	1	0	1	0	0	0	0	1	0	1	0	1	0	0	0	0	1	0
1	3	2	0	0	1	0	1	0	0	0	0	2	2	1	0	2	1	0	1	0	1	0
4	6	4	1	3	1	1	2	1	1	2	0	1	1	1	0	0	1	1	1	0	3	2
1	1	1	1	1	1	1	1	1	1	1	1	0	1	0	1	0	1	1	1	0	1	0
1	0	1	0	1	0	1	0	1	0	0	0	0	0	0	0	0	1	1	1	0	0	0
9	7	6	6	4	8	10	6	6	9	8	3	1	3	0	3	1	12	10	6	1	4	3
1	1	1	1	1	1	0	1	0	1	1	1	1	1	0	1	1	0	0	0	0	0	0
0	1	1	1	0	1	0	1	0	0	1	1	0	1	0	1	0	0	0	0	0	0	0
9	10	10	1	4	4	7	4	6	6	5	4	0	3	1	3	0	8	4	0	2	2	2
1	3	3	2	2	1	1	1	1	1	1	1	0	1	0	1	0	1	3	1	1	2	0
1	1	1	1	1	0	0	0	0	0	0	0	0	0	0	0	0	0	0	0	0	0	0
1	1	1	1	1	0	1	0	1	0	1	0	0	0	1	0	0	2	2	0	0	0	0
4	3	1	2	2	3	3	3	3	2	3	2	0	2	0	2	0	4	2	2	2	1	1
0	0	1	1	1	0	0	0	0	0	0	0	0	0	0	0	0	0	0	0	0	0	0
0	0	1	0	1	0	0	0	0	0	0	0	0	0	0	0	0	0	1	0	0	0	0
1	1	1	0	0	0	1	1	1	0	0	0	1	1	1	0	0	1	1	0	0	0	1
1	1	1	1	0	0	0	0	0	0	0	0	1	0	0	0	2	0	0	0	0	0	1
1	1	2	1	3	3	4	3	1	3	3	1	2	3	2	3	2	4	1	2	1	2	0
2	2	1	1	1	0	1	0	1	0	1	1	1	1	1	0	1	1	0	1	1	1	0
1	1	1	0	1	0	1	0	1	1	1	1	1	1	1	0	1	1	1	2	0	0	0
1	0	1	0	1	0	0	0	0	0	1	0	0	0	0	0	0	0	0	0	0	0	1
0	0	1	1	0	0	1	0	0	0	3	0	0	0	0	0	0	0	0	0	0	0	0
0	0	1	0	0	1	1	0	0	1	1	0	0	0	0	0	0	1	1	1	0	0	0
1	1	1	0	1	1	0	1	2	1	1	0	0	0	0	0	0	1	2	4	0	0	1
2	0	1	1	0	0	0	0	0	0	0	0	0	0	0	0	0	0	0	0	0	0	1
4	4	3	3	3	1	0	2	2	4	1	1	2	1	1	1	1	2	0	1	1	1	1
4	4	2	0	1	2	0	1	0	2	3	0	0	0	1	0	0	0	0	0	0	0	0
1	0	1	0	1	0	0	0	0	0	0	0	0	0	0	0	0	0	0	1	0	0	0
1	1	1	1	1	1	1	1	1	1	1	1	1	1	0	1	0	1	1	1	1	1	1
1	1	1	1	0	1	1	1	1	1	1	1	0	1	0	2	0	1	1	0	1	1	2
1	1	1	1	0	1	1	1	1	1	0	1	0	1	1	1	1	1	1	0	1	0	1
2	1	2	1	0	1	0	1	0	1	0	0	0	0	0	0	0	0	0	0	0	1	0
2	1	1	0	0	0	1	1	1	1	1	1	1	1	1	1	2	1	0	1	2	1	0
1	1	1	1	1	1	0	2	0	2	2	1	1	0	1	1	1	0	2	1	0	0	0
1	1	1	1	1	2	0	2	0	2	2	1	1	0	1	1	1	0	2	1	0	0	0
1	1	1	0	0	0	1	0	2	0	1	1	0	1	1	0	1	2	0	1	1	1	0
2	2	2	1	0	0	1	0	1	0	0	1	0	1	1	0	0	1	0	0	1	1	0
1	1	1	1	1	1	2	1	1	1	1	1	1	1	1	1	1	2	2	2	1	1	1
0	0	1	1	0	0	1	0	1	0	0	0	0	0	0	0	0	1	0	0	0	0	0
0	0	0	1	2	1	1	1	2	0	2	1	0	1	1	1	0	2	1	2	2	1	2
0	0	0	0	0	0	0	0	0	0	0	0	0	0	0	0	0	0	0	0	0	0	1
0	0	0	0	0	0	0	0	0	0	0	0	0	0	0	0	0	0	0	0	0	0	1
0	0	0	0	0	0	0	0	0	0	0	0	0	0	0	0	0	0	0	0	0	0	1
0	0	0	0	0	0	0	0	0	0	0	0	0	0	0	0	0	0	0	0	0	0	1
0	0	0	0	0	0	0	0	0	0	0	0	0	0	0	0	0	0	0	0	0	1	1
0	0	0	0	0	0	0	0	0	0	0	0	0	0	0	0	0	0	0	0	0	0	1
0	0	0	0	0	0	0	0	0	0	0	0	0	0	0	0	0	0	0	0	0	0	1
0	0	0	0	0	0	0	0	0	0	0	0	0	0	0	0	0	0	0	0	0	0	1
0	0	0	0	0	0	0	0	1	1	0	1	0	1	0	0	0	1	0	0	0	0	1
0	0	0	0	0	1	0	0	0	1	1	0	1	1	0	0	1	1	0	0	0	1	1
0	0	0	0	1	1	1	0	1	1	1	1	0	1	0	1	0	1	0	0	0	0	1
0	1	0	1	1	1	1	1	1	1	1	1	1	1	1	1	1	0	1	1	1	1	1
1	1	0	1	1	1	1	1	1	1	1	1	1	1	0	1	1	1	1	1	1	1	1
0	0	0	0	0	0	0	0	0	0	1	1	0	1	0	1	0	0	1	1	0	0	1
1	1	0	2	2	2	2	1	2	1	1	1	1	2	1	1	1	1	1	1	2	1	1
1	0	0	2	2	1	1	0	1	0	1	0	0	0	0	0	0	1	2	1	1	1	1
0	0	0	0	0	1	0	1	0	1	1	1	1	1	1	1	1	0	1	0	1	0	1
0	0	0	0	0	0	0	0	0	0	0	0	0	0	0	0	0	0	0	0	0	0	1
0	0	0	0	0	0	0	0	0	0	0	0	0	0	0	0	0	0	0	0	0	0	1
0	0	0	0	0	0	0	0	0	0	0	0	0	0	0	0	0	0	0	0	0	0	1
1	0	0	1	0	0	0	0	0	0	1	0	0	0	0	0	0	1	0	0	0	0	1
0	1	0	1	1	0	1	0	1	1	2	1	1	1	1	0	1	1	1	1	2	1	1
0	0	0	0	0	0	0	0	0	0	0	0	0	0	0	0	0	0	0	0	0	0	1
0	0	0	0	0	0	0	0	0	0	0	0	0	0	0	0	0	0	0	0	0	0	1
0	0	0	0	0	0	0	0	0	0	0	0	0	0	0	0	0	0	0	0	0	0	1
0	0	0	0	0	0	0	0	0	0	0	0	0	0	0	0	0	1	1	0	1	0	1
0	0	0	0	0	1	1	1	1	1	2	2	0	2	0	0	0	1	1	1	0	0	1
1	2	0	0	0	0	0	0	0	0	0	0	0	0	0	0	0	0	0	0	0	2	1
0	0	0	1	0	0	0	0	0	0	0	0	0	0	0	0	0	0	0	0	0	0	1
0	0	0	1	0	0	0	0	0	0	0	0	0	0	0	0	0	0	0	0	0	0	1
0	0	0	0	0	0	0	0	0	0	0	0	0	0	0	0	0	0	0	0	0	0	1
1	1	0	0	0	1	0	0	2	0	1	0	1	1	1	1	1	2	1	0	1	1	1
1	1	0	1	0	0	0	0	1	0	1	1	0	1	0	1	0	1	1	1	0	1	0
1	2	0	0	0	1	0	1	0	0	1	0	0	1	1	1	0	1	1	0	1	0	0
1	0	0	0	1	1	2	0	1	1	1	0	1	1	1	1	0	1	1	1	0	1	0
1	0	0	0	0	0	0	0	0	0	0	0	0	0	0	0	0	0	0	0	0	0	0
1	1	0	0	1	0	0	0	0	0	0	0	0	1	0	1	0	0	0	0	0	0	0
1	2	0	0	0	0	0	0	1	0	1	0	0	1	1	1	1	0	1	0	0	0	0
1	1	0	1	1	1	1	1	1	1	1	0	2	0	1	0	2	1	1	1	1	1	0
1	0	0	0	0	0	0	0	0	0	0	0	0	0	0	0	0	0	0	0	0	0	0
1	0	0	0	0	0	0	0	0	0	0	0	0	0	0	0	0	0	0	0	0	0	0
1	0	0	0	0	0	0	0	0	0	0	0	0	0	0	0	0	0	0	0	0	0	0
1	1	0	0	0	0	0	0	0	0	0	0	0	0	0	0	0	0	0	0	0	0	0
1	1	0	0	0	0	0	0	0	0	0	0	0	0	0	0	0	0	0	0	0	0	0
1	1	0	1	0	0	0	0	0	0	0	0	0	0	0	0	0	0	0	0	0	0	0
1	0	0	0	0	0	0	0	1	0	1	0	0	0	0	1	0	1	1	1	0	0	0
3	4	0	0	1	0	0	0	0	0	0	0	0	0	0	0	0	0	0	0	0	0	0
1	1	0	0	1	0	0	0	0	0	0	0	0	0	0	0	0	0	0	0	0	0	0
1	1	0	1	1	0	1	0	1	0	1	1	0	1	0	0	0	1	1	1	0	0	0
5	1	0	0	0	1	3	1	3	1	2	1	0	2	2	0	1	5	6	4	1	0	0
1	1	0	0	0	0	0	0	0	0	0	0	0	0	0	0	0	0	0	0	0	0	0
1	1	0	0	0	0	0	0	0	0	0	0	0	0	0	0	0	0	0	0	0	1	0
1	0	0	0	0	0	0	0	0	0	0	0	0	0	0	0	0	0	0	0	0	0	0
0	1	0	0	0	0	0	0	0	0	0	0	0	0	0	0	0	0	0	0	0	0	0
0	1	0	0	0	0	1	0	1	0	1	0	0	0	1	0	0	1	1	1	0	0	0
0	1	0	0	0	0	0	0	1	0	1	1	0	0	1	1	1	1	1	1	1	0	0
0	1	0	0	0	1	0	0	0	0	1	0	0	0	0	0	1	0	0	0	0	0	0
0	1	0	0	0	0	0	0	0	0	0	0	0	0	0	0	1	0	0	0	0	0	0
0	1	0	1	0	0	1	0	1	0	0	0	0	0	0	0	0	1	0	1	0	0	0
0	1	0	0	0	0	0	0	0	0	0	0	0	0	0	0	0	0	0	0	0	0	0
0	1	0	0	0	0	0	0	0	0	0	0	0	0	0	0	0	0	0	0	0	0	0
0	1	0	0	0	0	0	0	0	0	0	0	0	0	0	0	0	0	0	0	0	0	0
0	1	0	0	0	0	0	0	0	0	0	0	0	0	0	0	0	0	0	0	0	0	0
0	1	0	1	1	0	0	0	0	0	0	0	0	0	0	0	0	0	0	0	0	0	0
0	1	0	0	0	0	0	0	0	0	0	0	0	0	0	0	0	0	0	0	0	1	0
0	1	0	0	0	0	0	0	0	0	0	0	0	0	0	0	0	0	0	0	0	0	0
0	1	0	0	0	0	0	0	0	0	0	0	0	0	0	0	0	0	0	0	0	0	0
0	1	0	0	0	0	0	0	0	0	0	0	0	0	0	0	0	0	0	0	0	0	0
0	1	0	0	1	0	0	0	0	0	0	0	0	0	0	0	0	0	0	0	0	0	0
0	1	0	0	1	0	1	0	1	0	1	0	0	1	0	0	0	0	1	2	0	1	0
0	1	0	0	0	0	0	0	0	0	0	0	0	0	0	0	0	0	0	0	0	0	0
0	0	0	1	1	0	0	0	0	0	0	0	0	0	0	0	0	0	0	0	0	1	0
0	0	0	1	0	0	0	0	0	0	0	0	0	0	0	0	0	0	0	0	0	0	0
0	0	0	1	0	0	0	0	0	0	0	0	0	0	0	0	0	0	0	0	0	0	0
0	0	0	1	0	0	0	0	0	0	0	0	0	0	0	0	0	0	0	0	0	0	0
0	0	0	1	0	0	0	0	0	0	0	0	0	0	0	0	0	0	0	0	0	0	0
0	0	0	1	0	0	0	0	0	0	0	0	0	0	0	0	0	0	0	0	0	0	0
0	0	0	1	0	0	0	0	0	0	0	0	0	0	0	0	0	0	0	0	0	0	0
0	0	0	1	0	1	0	1	0	1	0	0	1	0	0	1	0	0	0	0	0	0	0
0	0	0	1	0	0	0	0	0	0	0	0	1	0	1	0	1	0	0	0	1	0	0
0	0	0	0	1	0	0	0	1	0	0	1	0	2	1	0	0	1	1	0	2	1	0
0	0	0	0	0	0	1	0	1	0	1	1	0	1	0	1	0	1	1	1	1	0	0
0	0	0	0	0	0	0	1	1	1	1	1	0	1	0	1	0	1	1	1	0	0	0
0	0	0	0	0	0	1	0	1	0	1	1	0	1	0	1	0	1	1	0	0	0	0
0	0	0	0	0	0	0	0	0	0	1	1	0	1	0	1	0	0	0	1	0	0	0
0	0	0	0	0	0	0	0	0	0	0	1	0	1	0	1	0	1	0	1	0	0	0
0	0	0	0	0	0	0	0	1	0	1	1	0	1	0	1	0	1	1	1	0	0	0
0	0	0	0	0	0	0	0	0	0	0	1	0	0	0	0	0	0	0	0	0	0	0
0	0	0	0	0	0	2	0	1	0	1	1	0	1	0	1	0	1	1	1	0	1	0
0	0	0	0	0	0	0	0	0	0	0	0	1	0	0	0	0	0	0	0	0	0	0
0	0	0	0	1	1	0	0	0	0	0	0	1	0	1	0	1	0	0	0	0	0	0
0	0	0	0	0	0	0	0	0	0	0	0	1	0	1	0	1	0	0	0	0	0	0
0	0	0	0	0	0	0	0	0	0	0	0	1	0	0	0	0	0	0	0	0	0	0
0	0	0	0	0	0	0	0	0	0	0	0	1	0	0	0	0	0	0	0	0	0	0
0	0	0	0	0	0	1	0	1	0	1	0	1	0	0	0	0	1	1	0	0	0	0
0	0	0	0	0	0	0	0	0	0	0	0	1	0	0	0	0	0	0	0	0	0	0
0	0	0	0	0	0	0	0	0	0	0	0	1	0	1	0	1	0	0	0	0	0	0
0	0	0	0	0	1	0	1	0	1	0	0	1	0	1	0	1	0	0	0	1	1	0
0	0	0	0	0	0	0	0	0	0	0	0	1	0	1	0	1	0	0	0	0	0	0
0	0	0	0	0	0	1	0	1	0	1	0	0	1	0	0	0	1	1	1	0	0	0
0	0	0	0	0	0	0	0	0	0	1	0	0	1	0	1	0	0	0	0	0	0	0
0	0	0	0	0	0	0	0	0	0	0	0	0	1	0	0	0	0	0	0	0	0	0
0	0	0	0	0	0	0	0	0	0	1	0	0	1	0	0	0	0	1	1	0	0	0
0	0	0	0	0	0	0	0	0	0	0	0	0	1	0	0	0	0	0	0	0	0	0
0	0	0	0	0	0	0	0	0	0	0	0	0	1	0	0	0	0	0	0	0	0	0
0	0	0	0	0	0	0	0	1	0	0	0	0	1	0	1	0	1	0	1	0	0	0
0	0	0	0	0	0	0	0	1	0	0	0	0	1	0	0	0	0	0	0	0	0	0
0	0	0	0	0	0	0	0	1	0	0	0	0	1	0	0	0	1	1	0	0	1	0
0	0	0	0	0	0	0	0	0	0	0	0	0	1	0	1	0	0	0	0	0	0	0
0	0	0	0	0	0	0	0	0	0	0	0	0	0	1	0	0	0	0	0	0	0	0
0	0	0	0	0	0	0	0	0	0	0	0	0	0	1	0	0	0	0	0	0	0	0
0	0	0	0	0	0	0	0	0	0	0	0	0	0	1	0	0	0	0	0	1	0	0
0	0	0	0	0	0	0	0	0	0	0	0	0	0	1	0	0	0	0	0	0	0	0
0	0	0	0	0	0	0	0	0	0	0	0	0	0	1	0	0	0	0	0	0	0	0
0	0	0	0	0	1	0	1	0	1	0	0	0	0	0	0	0	0	0	0	0	0	0
0	0	0	0	0	1	1	1	0	1	1	0	0	0	0	1	0	1	0	0	0	0	0
0	0	0	0	0	1	0	1	0	1	0	0	0	0	0	0	0	0	0	0	0	0	0
0	0	0	0	0	1	0	0	0	0	0	0	0	0	0	0	0	0	0	0	0	0	0
0	0	0	0	0	2	0	1	0	1	0	0	0	0	0	0	0	0	0	0	0	0	0
0	0	0	0	0	1	0	0	0	0	0	0	0	0	0	0	0	0	0	0	0	0	0
0	0	0	0	0	1	0	0	0	0	0	0	0	0	0	0	0	0	0	0	0	0	0
0	0	0	0	0	2	2	2	2	2	1	0	0	0	0	0	0	2	1	2	0	0	0
0	0	0	0	0	1	0	1	0	0	0	0	0	0	0	0	0	0	0	0	0	0	0
0	0	0	0	0	0	1	0	0	0	0	0	0	0	0	0	0	0	0	0	0	0	0
0	0	0	0	1	0	1	0	1	0	1	0	0	0	0	0	0	1	0	1	1	0	0
0	0	0	0	0	0	1	0	0	0	0	0	0	0	0	0	0	0	0	0	0	0	0
0	0	0	0	0	0	1	0	1	0	1	0	0	0	0	0	0	1	1	1	0	0	0
0	0	0	0	0	0	1	0	1	0	1	0	0	0	0	0	0	2	2	0	0	0	0
0	0	0	0	0	0	1	0	0	0	0	0	0	0	0	0	0	0	0	0	0	0	0
0	0	0	0	0	0	1	0	1	0	1	0	0	0	0	0	0	1	1	1	0	1	0
0	0	0	0	0	0	1	0	1	0	1	0	0	0	0	0	0	1	0	0	0	0	0
0	0	0	0	0	0	1	0	1	0	1	0	0	0	0	0	0	1	1	0	0	0	0
0	0	0	0	0	0	1	0	0	0	0	0	0	0	0	0	0	0	0	0	0	0	0
0	0	0	0	0	0	0	0	0	0	0	0	0	0	0	1	0	0	0	0	0	0	0
0	0	0	0	0	0	0	0	0	0	0	0	0	0	0	1	0	0	0	0	0	0	0
0	0	0	0	0	0	0	0	0	0	0	0	0	0	0	0	1	0	0	0	1	0	0
0	0	0	0	0	0	0	0	0	0	0	0	0	0	0	0	1	0	0	0	0	0	0
0	0	0	0	0	0	0	0	0	0	0	0	0	0	0	0	1	0	0	0	0	0	0
0	0	0	0	0	0	0	0	0	0	0	0	0	0	0	0	1	0	0	0	0	0	0
0	0	0	0	0	0	0	1	0	0	0	0	0	0	0	0	0	0	0	0	0	0	0
0	0	0	0	0	0	0	1	0	0	0	0	0	0	0	0	0	0	0	0	0	0	0
0	0	0	0	0	0	0	1	0	2	0	0	0	0	0	0	0	0	0	0	0	0	0
0	0	0	0	0	0	0	0	1	0	0	0	0	0	0	0	0	0	0	0	0	0	0
0	0	0	0	0	0	0	0	1	0	0	0	0	0	0	0	0	0	0	0	0	0	0
0	0	0	0	0	0	0	0	1	0	0	0	0	0	0	0	0	0	0	0	0	0	0
0	0	0	0	0	0	0	0	1	0	0	0	0	0	0	0	0	0	0	0	1	0	0
0	0	0	0	0	0	0	0	1	0	0	0	0	0	0	0	0	0	0	0	0	0	0
0	0	0	0	0	0	0	0	1	0	0	0	0	0	0	0	0	0	0	0	0	0	0
0	0	0	0	0	0	0	0	1	0	0	0	0	0	0	0	0	1	0	0	0	0	0
0	0	0	0	0	0	0	0	0	0	0	0	0	0	0	0	0	0	0	0	1	0	0
0	0	0	0	0	0	0	0	0	0	0	0	0	0	0	0	0	0	0	0	1	0	0
0	0	0	0	0	0	0	0	0	0	0	0	0	0	0	0	0	0	0	0	1	0	0
0	0	0	0	0	0	0	0	0	0	0	0	0	0	0	0	0	0	0	0	1	0	0
0	0	0	0	0	0	0	0	0	0	0	0	0	0	0	0	0	0	0	0	1	0	0
0	0	0	0	0	0	0	0	0	0	0	0	0	0	0	0	0	0	0	0	1	0	0
0	0	0	0	0	0	0	0	0	0	0	0	0	0	0	0	0	0	0	0	1	0	0
0	0	0	0	0	0	0	0	0	0	0	0	0	0	0	0	0	0	0	0	1	0	0
0	0	0	0	0	0	0	0	0	0	0	0	0	0	0	0	0	0	0	0	1	0	0
0	0	0	0	0	0	0	0	0	0	0	0	0	0	0	0	0	0	0	0	1	0	0
0	0	0	0	0	0	0	0	0	0	0	0	0	0	0	0	0	0	0	0	1	0	0
0	0	0	0	0	0	0	0	0	0	0	0	0	0	0	0	0	0	0	0	1	0	0
0	0	0	0	0	0	0	0	0	0	1	0	0	0	0	0	0	1	1	0	0	0	0
0	0	0	0	0	0	0	0	0	0	0	0	0	0	0	0	0	1	0	0	0	0	0
0	0	0	0	0	0	0	0	0	0	0	0	0	0	0	0	0	1	0	0	0	0	0
0	0	0	0	1	0	0	0	0	1	0	0	0	0	0	0	0	0	0	0	0	0	0
0	0	0	0	0	0	0	0	0	1	0	0	0	0	0	0	0	0	0	0	0	0	0
0	0	0	0	0	0	0	0	0	1	0	0	0	0	0	0	0	0	0	0	0	0	0
0	0	0	0	0	0	0	0	0	1	0	0	0	0	0	0	0	0	0	0	0	0	0
0	0	0	0	0	0	0	0	0	1	0	0	0	0	0	0	0	0	0	0	0	0	0
0	0	0	0	1	0	0	0	0	0	1	0	0	0	0	0	0	0	2	0	0	0	0
0	0	0	0	0	0	0	0	0	0	1	0	0	0	0	0	0	0	0	0	0	0	0
0	0	0	0	0	0	0	0	0	0	1	0	0	0	0	0	0	0	0	1	0	0	0
0	0	0	0	0	0	0	0	0	0	0	0	0	0	0	0	0	0	1	0	0	0	0
0	0	0	0	0	0	0	0	0	0	0	0	0	0	0	0	0	0	1	1	0	0	0
0	0	0	0	0	0	0	0	0	0	0	0	0	0	0	0	0	0	1	0	0	0	0
0	0	0	0	0	0	0	0	0	0	0	0	0	0	0	0	0	0	1	0	0	0	0
0	0	0	0	0	0	0	0	0	0	0	0	0	0	0	0	0	0	1	0	0	0	0
0	0	0	0	0	0	0	0	0	0	0	0	0	0	0	0	0	0	1	0	0	0	0
0	0	0	0	0	0	0	0	0	0	0	0	0	0	0	0	0	0	1	0	0	0	0
0	0	0	0	0	0	0	0	0	0	0	0	0	0	0	0	0	0	0	0	0	1	0
0	0	0	0	0	0	0	0	0	0	0	0	0	0	0	0	0	0	0	0	0	1	0
0	0	0	0	0	0	0	0	0	0	0	0	0	0	0	0	0	0	0	0	0	1	0
0	0	0	0	0	0	0	0	0	0	0	0	0	0	0	0	0	0	0	0	0	1	0
0	0	0	0	0	0	0	0	0	0	0	0	0	0	0	0	0	0	0	0	0	1	0
0	0	0	0	0	0	0	0	0	0	0	0	0	0	0	0	0	0	0	0	0	1	0
0	0	0	0	0	0	0	0	0	0	0	0	0	0	0	0	0	0	0	0	0	1	0
0	0	0	0	0	0	0	0	0	0	0	0	0	0	0	0	0	0	0	0	0	1	0
0	0	0	0	0	0	0	0	0	0	0	0	0	0	0	0	0	0	0	0	0	1	0
0	0	0	0	0	0	0	0	0	0	0	0	0	0	0	0	0	0	0	0	0	1	0
0	0	0	0	0	0	0	0	0	0	0	0	0	0	0	0	0	0	0	0	0	1	0
0	0	0	0	0	0	0	0	0	0	0	0	0	0	0	0	0	0	0	0	0	1	0
0	0	0	0	0	0	0	0	0	0	0	0	0	0	0	0	0	0	0	0	0	1	0
0	0	0	0	0	0	0	0	0	0	0	0	0	0	0	0	0	0	0	0	0	1	0
0	0	0	0	0	0	0	0	0	0	0	0	0	0	0	0	0	0	0	1	0	0	0
0	0	0	0	0	0	0	0	0	0	0	0	0	0	0	0	0	0	0	1	0	0	0
0	0	0	0	0	0	0	0	0	0	0	0	0	0	0	0	0	0	0	1	0	0	0
0	0	0	0	0	0	0	0	0	0	0	0	0	0	0	0	0	0	0	1	0	0	0
0	0	0	0	1	0	0	0	0	0	0	0	0	0	0	0	0	0	0	0	0	0	0
0	0	0	0	1	0	0	0	0	0	0	0	0	0	0	0	0	0	0	0	0	0	0
0	0	0	0	1	0	0	0	0	0	0	0	0	0	0	0	0	0	0	0	0	0	0
0	0	0	0	1	0	0	0	0	0	0	0	0	0	0	0	0	0	0	0	0	0	0
0	0	0	0	1	0	0	0	0	0	0	0	0	0	0	0	0	0	0	0	0	0	0
0	0	0	0	1	0	0	0	0	0	0	0	0	0	0	0	0	0	0	0	0	0	0
0	0	0	0	1	0	0	0	0	0	0	0	0	0	0	0	0	0	0	0	0	0	0
																				195	245	238

## Sheet: Wild rice private genes
The private NBS OG of wild rice species
OG0004848
OG0023355
OG0024074
OG0024415
OG0022768
OG0003629
OG0000332
OG0011244
OG0027790
OG0021023
OG0023308
OG0022384
OG0004376
OG0030749
OG0028695
OG0033191
OG0032903
OG0031723
OG0026975
OG0026804
OG0023481
OG0015209
OG0008002
OG0035742
OG0034717
OG0033198
OG0026453
OG0022282
OG0003240
OG0033718
OG0032440
OG0031339
OG0030670
OG0028296
OG0028110
OG0024733
OG0018466
OG0005784
OG0043704
OG0041311
OG0038844
OG0038652
OG0038564
OG0037906
OG0037019
OG0035332
OG0003586
OG0002589
OG0052441
OG0051458
OG0043731
OG0043107
OG0041429
OG0037895
OG0035075
OG0026265
OG0025297
OG0023606
OG0023154
OG0015024
OG0007951
OG0005693
OG0003491
OG0002590
OG0068853
OG0067576
OG0067061
OG0066433
OG0066347
OG0064523
OG0063237
OG0062220
OG0061161
OG0056116
OG0056115
OG0056033
OG0052695
OG0044116
OG0042390
OG0042121
OG0039823
OG0039052
OG0031934
OG0029524
OG0027764
OG0023859
OG0023365
OG0014771
OG0005487
OG0002843
OG0000407
OG0099191
OG0098716
OG0096439
OG0095627
OG0090792
OG0089856
OG0089212
OG0088728
OG0087540
OG0086412
OG0082352
OG0081978
OG0081629
OG0081484
OG0079061
OG0066598
OG0065083
OG0063511
OG0062262
OG0061495
OG0050042
OG0049461
OG0043118
OG0042024
OG0040108
OG0033267
OG0032573
OG0032387
OG0031868
OG0031076
OG0030475
OG0025497
OG0025380
OG0024596
OG0024192
OG0023410
OG0022577
OG0021026
OG0020821
OG0020535
OG0019177
OG0018862
OG0018593
OG0018501
OG0018445
OG0017858
OG0017612
OG0016967
OG0015129
OG0013552
OG0013181
OG0012399
OG0011017
OG0008018
OG0007665
OG0007367
OG0006564
OG0004312
OG0004289
OG0003760
OG0003612
OG0003338
OG0003179
OG0002938
OG0002215
OG0001293
OG0001179
OG0000863
OG0000319
OG0000146
OG0000007
