# Supplementary material for: Genome Evolution and Diversity of Wild and Cultivated Rice Species
Source: Research Square preprint supplement (doi:10.21203/rs.3.rs-4350570/v1), 2024-05-09
Supplement: Supplementary file 5 [file 94a00ad060fbeef5ff08baf0.xlsx]

## Sheet: Genome SV
The structural variation number and size within wild rice species
sub|genome	Deletion|sum size (bp)	Deletion|num	Deletion|max(bp)	Insertion|sum(bp)	Insertion|num	Insertion|max(bp)	Transcloation|sum(bp)	Transcloation|num	Transcloation|max(bp)	Inversions|sum(bp)	Inversions|num	Inversions|max(bp)
O. glumaepatula	167007125	10656	2076149	182428540	10419	1830916	887293	27	290991	41509	7	14585
O. rufipogon	162486268	8164	2765595	183670529	9209	3628348	716681	52	69110	43294	7	20139
O. brachyantha	249931442	2781	1511970	182132827	2680	3872463	9629	5	4967	123528	11	36815
O. punctata|Ct	255268559	7670	1858243	346514693	7232	8271212	48804	12	29384	213657	14	126484
O. minuta|Bt	256669926	7228	1392326	331776859	6598	3788228	60862	6	24917	215706	13	158035
O. mal|Bt	255764799	7342	2014502	327529084	6732	4193782	166925	5	148813	290994	12	142998
O. rhizomatis	260158175	8062	1803316	437894900	7598	4694634	49659	18	13264	313968	10	196018
O. mal|Ct	261205137	7100	2061721	371296906	6834	4409917	77549	15	29185	347935	14	129010
O. eichingeri	257171635	7867	1765500	392251362	7352	4204300	59853	19	16220	508585	14	349982
O. latifolia|Dt	248932742	5674	2540661	353631755	5349	5052118	88552	13	14079	543772	14	246662
O. minuta|Ct	266099186	7102	2934217	398816082	6746	8949115	40622	14	14750	702484	14	203240
O. punctata|Bt	255315764	7074	3337609	301119277	6401	3046380	64746	10	15324	746536	19	352638
O. australiensis	263736899	6476	1072146	705171584	6299	5927049	86837	9	27011	988853	20	377544
O. officinalis	256082496	7800	1141322	426951735	7398	3927169	53001	12	27827	1503209	14	625996
O. latifolia|Ct	253784730	7084	1756748	386516197	6750	4041070	32402	8	15197	1958452	19	814022
O. meyeriana	278648701	3498	2006694	604504773	3254	16456931	8641	4	4033	5965133	10	3016930
O. gradiglums|Dt	250058310	5235	4064553	316014046	4971	5703729	28185	6	10094	6495280	22	5929918
O. alta|Dt	249150740	5388	4064553	321221407	5111	4630386	57878	9	29293	7667626	19	3031379
O. gradiglums|Ct	249181881	6020	5168234	318297005	5625	11991785	99229	27	30073	11137733	12	9435606
O. alta|Ct	246684627	6125	2331545	308768238	5692	13488900	189583	78	102626	11327764	22	6485431

## Sheet: SV location
The distribution of SVs in the location of gene structure on the genome
	Species	Exon	Gene	Downstream	Upstream	Intron	Intergenic
Cultivar	O. glaberrmia	3414	5685	7118	11936	3697	19936
	O. sativa indica	2704	4392	5371	9358	2835	16049
Wild	O. meyeriana	3856	5009	3886	4746	3799	6390
	O. rufipogon	3023	4920	5932	10221	3267	16944
	O. grandiglumis|Ct	4760	6970	6000	7821	5370	11168
	O. grandiglumis|Dt	4260	6318	5204	6680	4926	9762
	O.latifolia|Ct	5565	8062	7018	9182	6111	13307
	O.latifolia|Dt	4671	6841	5603	7278	5225	10533
	O. malampuzhaensis|Bt	5564	8212	7114	9345	6292	13485
	O. malampuzhaensis|Ct	5732	8255	7260	9215	6298	13379
	O. alta|Ct	4841	7012	6067	7996	5363	11398
	O. alta|Dt	4523	6515	5357	6904	4988	10041
	O. minuta|Bt	5480	7998	6984	9145	6140	13289
	O. minuta|Ct	5666	8122	7119	9193	6180	13271
	O. australiensis	5596	8008	6605	8574	6096	12209
	O. officinalis	6096	8861	7663	10034	6731	14583
	O. punctata|Bt	5233	7767	6788	8837	6032	12949
	O. punctata|Ct	5990	8612	7605	9865	6592	14296
	O. rhizomatis	6336	9053	8050	10358	6864	15038
	O. brachyantha	3442	4433	3094	3817	3239	5072
	O. eichingeri	6020	8784	7716	10116	6746	14647
	O. glumaepatula	3702	6081	7501	12477	4060	20495

## Sheet: TE sub family in SV region
The number of TE sub-family in SV regions
Variation type	Species	Gypsy	Copiya	Other LTR	DNA	Other
DEL	O. glaberrmia	2932	1450	2103	4247	6528
	O. sativa indica	2378	1118	1599	3014	4854
	O. meyeriana	2592	1958	2456	2973	3107
	O. rufipogon	2619	1332	1874	3407	5216
	O. grandiglumis|Ct	3387	2271	3084	4532	4832
	O. grandiglumis|Dt	3071	2156	2877	3900	4212
	O.latifolia|Ct	3956	2553	3554	5298	5789
	O.latifolia|Dt	3303	2305	3021	4217	4529
	O. malampuzhaensis|Bt	3986	2613	3629	5388	5856
	O. malampuzhaensis|Ct	4043	2675	3668	5435	5777
	O. alta|Ct	3417	2239	3090	4623	4946
	O. alta|Dt	3180	2199	2963	4045	4345
	O. minuta|Bt	3943	2569	3547	5275	5765
	O. minuta|Ct	3981	2660	3620	5404	5793
	O. australiensis	3846	2540	3580	5013	5356
	O. officinalis	4313	2841	3950	5903	6367
	O. punctata|Bt	3816	2541	3484	5183	5634
	O. punctata|Ct	4327	2759	3879	5801	6275
	O. rhizomatis	4558	2914	4091	6159	6649
	O. brachyantha	2115	1636	2062	2450	2514
	O. eichingeri	4371	2805	3910	5916	6411
	O. glumaepatula	3118	1654	2344	4717	6688
INS	O. glaberrmia	593	148	282	1104	2570
	O. sativa indica	696	142	243	907	2430
	O. meyeriana	50	14	13	40	133
	O. rufipogon	691	135	254	940	2375
	O. grandiglumis|Ct	68	25	36	285	522
	O. grandiglumis|Dt	61	25	31	191	436
	O.latifolia|Ct	96	33	39	303	592
	O.latifolia|Dt	54	25	26	203	427
	O. malampuzhaensis|Bt	92	32	38	310	652
	O. malampuzhaensis|Ct	87	42	41	357	614
	O. alta|Ct	81	23	41	289	511
	O. alta|Dt	54	30	31	180	433
	O. minuta|Bt	89	47	28	301	621
	O. minuta|Ct	74	43	42	349	590
	O. australiensis	88	35	27	223	464
	O. officInalis	86	46	48	369	681
	O. punctata|Bt	92	34	36	321	638
	O. punctata|Ct	99	28	55	387	656
	O. rhizomatis	95	41	49	394	734
	O. brachyantha	18	7	8	24	61
	O. eichingeri	108	38	51	390	667
	O. glumaepatula	700	192	267	1158	2682

## Sheet: Mummer results
The mummer results of wild rice assemblies to NIP
Species	Collinear size	Genome_size	Percentage(%)
O. glaberrima	260445301	344750569	75.546
O. meyeriana	6507903	742528311	0.876452
O. sativa indica	298447364	390322188	76.4618
O. grandigumis|Ct	45994257	454884074	10.1112
O. grandigumis|Dt	34392218	450070459	7.64152
O. latifolia|Ct	51273306	546625894	9.37996
O. latifolia|Dt	37487562	510736461	7.3399
O. malampuzhaensis|Bt	49870973	466791938	10.6838
O. malampuzhaensis|Ct	50207554	514842920	9.75201
O. alta|Ct	45869727	456354181	10.0513
O. alta|Dt	34667141	457173059	7.58294
O. minuta|Bt	49705034	476571496	10.4297
O. minuta|Ct	50197677	540844746	9.28135
O. australiensis	33474046	902713972	3.70816
O. officinalis	50728336	594295013	8.53588
O. punctata|Bt	50963310	435384930	11.7053
O. punctata|Ct	52633381	489208212	10.7589
O. rhizomatis	50909395	601074595	8.46973
O. branchyantha	3546208	274400564	1.29235
O. eichingeri	51905892	544745050	9.52847
O. glumaepatula	244215195	391712539	62.3455
