# Supplementary material for: Genome Evolution and Diversity of Wild and Cultivated Rice Species
Source: Research Square preprint supplement (doi:10.21203/rs.3.rs-4350570/v1), 2024-05-09
Supplement: Supplementary file 6 [file aa285ab43b5d96c1323a813a.xlsx]

## Sheet: PanABCDEFG
The pangenome of Oryza super pangenome with different genome types
Type	Core gene families	Dispensable gene families	Private gene families
A	9834	31018	10544
B	9834	25443	2572
C	9834	37647	5956
D	9834	24754	2758
E	9834	18398	3107
F	9834	14713	4734
G	9834	14895	4396

## Sheet: GO of core genome
The GO enrichment of the core genome
ID	Description	GeneRatio	BgRatio	pvalue	p.adjust	qvalue	geneID	Count
GO:0016772	transFtrase activity, transFtrring phosphorus-containing groups	313/190905	387/383722	6.18726e-37	1.13784e-33	4.63068e-34	OMEM6G023361.1/OMEM6G037760.1/OGRW100G037339.1/OGRW100G044045.1/OGRW100G048396.1/OLAW128G045575.1/OMAW171G042670.1/OMAW171G045845.1/OMAW171G049312.1/OALW18G037553.1/OALW18G047553.1/OALW18G044327.1/OMIW190G042963.1/OMIW190G046165.1/OMIW190G049673.1/OAUW26G024421.1/OAUW26G024448.1/OAUW26G025127.1/OOFW323G024314.1/OPUW363G048997.1/OPUW363G042311.1/OPUW363G045596.1/ORHW375G020954.1/ORHW375G024377.1/O…	313
GO:0016310	phosphorylation	275/190905	339/383722	4.44351e-33	4.08581e-30	1.66281e-30	OMEM6G023361.1/OMEM6G037760.1/OGRW100G037339.1/OGRW100G044045.1/OGRW100G048396.1/OLAW128G045575.1/OMAW171G042670.1/OMAW171G045845.1/OMAW171G049312.1/OALW18G037553.1/OALW18G047553.1/OALW18G044327.1/OMIW190G042963.1/OMIW190G046165.1/OMIW190G049673.1/OAUW26G024421.1/OAUW26G024448.1/OAUW26G025127.1/OOFW323G024314.1/OPUW363G048997.1/OPUW363G042311.1/OPUW363G045596.1/ORHW375G020954.1/ORHW375G024377.1/O…	275
GO:0030060	L-malate dehydrogenase activity	168/190905	186/383722	2.47689e-32	1.51834e-29	6.1792e-30	OMEM6G022551.1/OMEM6G03659.1/OGRW100G039962.1/OGRW100G08820.1/OGRW100G02961.1/OGRW100G043228.1/OLAW128G044717.1/OLAW128G08720.1/OLAW128G02852.1/OLAW128G041027.1/OMAW171G03039.1/OMAW171G045012.1/OMAW171G041645.1/OMAW171G09054.1/OALW18G040095.1/OALW18G09036.1/OALW18G03007.1/OALW18G043493.1/OMIW190G03044.1/OMIW190G045364.1/OMIW190G041947.1/OMIW190G09097.1/OAUW26G023642.1/OAUW26G03283.1/OOFW323G02338…	168
GO:0000139	Golgi membrane	184/190905	212/383722	5.52125e-30	2.53839e-27	1.03305e-27	OMEM6G031314.1/OMEM6G033490.1/OGRW100G059734.1/OGRW100G064499.1/OGRW100G062389.1/OGRW100G066877.1/OLAW128G062507.1/OLAW128G067015.1/OLAW128G064535.1/OMAW171G063701.1/OMAW171G066005.1/OMAW171G060736.1/OMAW171G068391.1/OALW18G060206.1/OALW18G067467.1/OALW18G062856.1/OALW18G064907.1/OMIW190G061008.1/OMIW190G068866.1/OMIW190G064041.1/OMIW190G066165.1/OAUW26G034764.1/OOFW323G032727.1/OOFW323G034598.1/…	184
GO:0032508	DNA duplex unwinding	171/190905	195/383722	3.62107e-29	1.33183e-26	5.42018e-27	OMEM6G010497.1/OMEM6G02686.1/OGRW100G015804.1/OGRW100G07952.1/OGRW100G020707.1/OGRW100G02155.1/OLAW128G016120.1/OLAW128G07808.1/OLAW128G02038.1/OLAW128G020581.1/OMAW171G020671.1/OMAW171G046827.1/OMAW171G015955.1/OMAW171G08055.1/OALW18G021047.1/OALW18G08151.1/OALW18G016351.1/OALW18G02170.1/OMIW190G016039.1/OMIW190G047154.1/OMIW190G020879.1/OMIW190G08051.1/OAUW26G010869.1/OAUW26G02416.1/OOFW323G011…	171
GO:0015969	guanosine tetraphosphate metabolic process	151/190905	168/383722	1.23563e-28	3.78721e-26	1.54129e-26	OMEM6G019649.1/OMEM6G019650.1/OGRW100G037036.1/OGRW100G037037.1/OGRW100G040642.1/OGRW100G040644.1/OLAW128G041880.1/OLAW128G041881.1/OLAW128G038474.1/OLAW128G038475.1/OMAW171G042350.1/OMAW171G042351.1/OMAW171G038937.1/OMAW171G038938.1/OALW18G037224.1/OALW18G037225.1/OALW18G040783.1/OALW18G040785.1/OMIW190G042526.1/OMIW190G042527.1/OMIW190G039251.1/OMIW190G039252.1/OAUW26G020741.1/OAUW26G020742.1/O…	151
GO:0005388	calcium-transporting ATPase activity	206/190905	250/383722	6.51831e-27	1.71245e-24	6.9692e-25	OMEM6G011152.1/OMEM6G041628.1/OGRW100G024160.1/OGRW100G079475.1/OGRW100G027881.1/OGRW100G081627.1/OLAW128G028861.1/OLAW128G082724.1/OLAW128G023907.1/OLAW128G080242.1/OMAW171G029160.1/OMAW171G082423.1/OMAW171G084855.1/OALW18G024595.1/OALW18G080819.1/OALW18G028492.1/OALW18G083089.1/OMIW190G024254.1/OMIW190G085454.1/OMIW190G029273.1/OMIW190G082966.1/OAUW26G014471.1/OAUW26G043071.1/OOFW323G014656.1/O…	206
GO:0004402	histone acetyltransFtrase activity	135/190905	149/383722	1.35634e-26	3.11788e-24	1.26889e-24	OMEM6G026124.1/OGRW100G026338.1/OGRW100G050804.1/OLAW128G048243.1/OLAW128G051392.1/OMAW171G048437.1/OMAW171G051733.1/OALW18G026891.1/OALW18G046692.1/OMIW190G048773.1/OMIW190G052242.1/OAUW26G027236.1/OOFW323G026918.1/OPUW363G051670.1/OPUW363G048157.1/ORHW375G026996.1/OBRW59G023571.1/OEIW71G027094.1/OGLW97G0027248.1/OMEM6G033176.1/OGRW100G064151.1/OGRW100G066563.1/OLAW128G066675.1/OLAW128G064196.1/…	135
GO:0006796	phosphate-containing compound metabolic process	147/190905	166/383722	2.70562e-26	5.52849e-24	2.24994e-24	OMEM6G019097.1/OMEM6G019279.1/OMEM6G021439.1/OMEM6G05357.1/OMEM6G06213.1/OGRW100G010563.1/OGRW100G036446.1/OGRW100G036645.1/OGRW100G038847.1/OGRW100G054696.1/OGRW100G071286.1/OGRW100G040274.1/OGRW100G042200.1/OGRW100G04581.1/OGRW100G05428.1/OLAW128G010525.1/OLAW128G011443.1/OLAW128G034637.1/OLAW128G041438.1/OLAW128G043563.1/OLAW128G069613.1/OLAW128G037934.1/OLAW128G038126.1/OLAW128G039966.1/OLAW1…	147
GO:0000250	lanosterol synthase activity	126/190905	138/383722	1.07092e-25	1.51494e-23	6.16537e-24	OMEM6G024552.1/OMEM6G038138.1/OMEM6G06729.1/OMEM6G06730.1/OGRW100G011939.1/OGRW100G011941.1/OGRW100G045041.1/OGRW100G073744.1/OGRW100G016474.1/OGRW100G049332.1/OGRW100G076164.1/OGRW100G076167.1/OLAW128G012030.1/OLAW128G046840.1/OLAW128G046847.1/OLAW128G076693.1/OLAW128G076694.1/OLAW128G049976.1/OLAW128G074093.1/OMAW171G016637.1/OMAW171G046882.1/OMAW171G078744.1/OMAW171G011986.1/OMAW171G011987.1/O…	126
GO:0005811	lipid droplet	126/190905	138/383722	1.07092e-25	1.51494e-23	6.16537e-24	OMEM6G024552.1/OMEM6G038138.1/OMEM6G06729.1/OMEM6G06730.1/OGRW100G011939.1/OGRW100G011941.1/OGRW100G045041.1/OGRW100G073744.1/OGRW100G016474.1/OGRW100G049332.1/OGRW100G076164.1/OGRW100G076167.1/OLAW128G012030.1/OLAW128G046840.1/OLAW128G046847.1/OLAW128G076693.1/OLAW128G076694.1/OLAW128G049976.1/OLAW128G074093.1/OMAW171G016637.1/OMAW171G046882.1/OMAW171G078744.1/OMAW171G011986.1/OMAW171G011987.1/O…	126
GO:0016104	triterpenoid biosynthetic process	126/190905	138/383722	1.07092e-25	1.51494e-23	6.16537e-24	OMEM6G024552.1/OMEM6G038138.1/OMEM6G06729.1/OMEM6G06730.1/OGRW100G011939.1/OGRW100G011941.1/OGRW100G045041.1/OGRW100G073744.1/OGRW100G016474.1/OGRW100G049332.1/OGRW100G076164.1/OGRW100G076167.1/OLAW128G012030.1/OLAW128G046840.1/OLAW128G046847.1/OLAW128G076693.1/OLAW128G076694.1/OLAW128G049976.1/OLAW128G074093.1/OMAW171G016637.1/OMAW171G046882.1/OMAW171G078744.1/OMAW171G011986.1/OMAW171G011987.1/O…	126
GO:0042300	beta-amyrin synthase activity	126/190905	138/383722	1.07092e-25	1.51494e-23	6.16537e-24	OMEM6G024552.1/OMEM6G038138.1/OMEM6G06729.1/OMEM6G06730.1/OGRW100G011939.1/OGRW100G011941.1/OGRW100G045041.1/OGRW100G073744.1/OGRW100G016474.1/OGRW100G049332.1/OGRW100G076164.1/OGRW100G076167.1/OLAW128G012030.1/OLAW128G046840.1/OLAW128G046847.1/OLAW128G076693.1/OLAW128G076694.1/OLAW128G049976.1/OLAW128G074093.1/OMAW171G016637.1/OMAW171G046882.1/OMAW171G078744.1/OMAW171G011986.1/OMAW171G011987.1/O…	126
GO:0042555	MCM complex	131/190905	145/383722	1.49252e-25	1.96053e-23	7.9788e-24	OMEM6G010497.1/OMEM6G02686.1/OGRW100G015804.1/OGRW100G07952.1/OGRW100G020707.1/OGRW100G02155.1/OLAW128G016120.1/OLAW128G07808.1/OLAW128G02038.1/OLAW128G020581.1/OMAW171G020671.1/OMAW171G046827.1/OMAW171G015955.1/OMAW171G08055.1/OALW18G021047.1/OALW18G08151.1/OALW18G016351.1/OALW18G02170.1/OMIW190G016039.1/OMIW190G047154.1/OMIW190G020879.1/OMIW190G08051.1/OAUW26G010869.1/OAUW26G02416.1/OOFW323G011…	131
GO:0006914	autophagy	264/190905	343/383722	3.74837e-25	4.59551e-23	1.87024e-23	OMEM6G011284.1/OGRW100G024309.1/OGRW100G09065.1/OGRW100G028051.1/OGRW100G03182.1/OLAW128G029031.1/OLAW128G08952.1/OLAW128G024046.1/OLAW128G03073.1/OMAW171G029320.1/OMAW171G03280.1/OMAW171G024226.1/OMAW171G08830.1/OALW18G024754.1/OALW18G09258.1/OALW18G028646.1/OALW18G03232.1/OMIW190G024427.1/OMIW190G03280.1/OMIW190G029461.1/OMIW190G08827.1/OAUW26G014675.1/OAUW26G03540.1/OOFW323G014820.1/OOFW323G03…	264
GO:0008094	DNA-dependent ATPase activity	250/190905	322/383722	7.08572e-25	8.14415e-23	3.31444e-23	OMAW171G079880.1/OLAW128G011187.1/OMIW190G05445.1/ORHW375G05642.1/OLAW128G05129.1/OALW18G011441.1/OMEM6G039214.1/OMEM6G041213.1/OGRW100G074817.1/OGRW100G079034.1/OGRW100G077098.1/OGRW100G081225.1/OLAW128G077867.1/OLAW128G082227.1/OLAW128G075119.1/OLAW128G079827.1/OMAW171G081893.1/OMAW171G077008.1/OMAW171G084345.1/OALW18G075880.1/OALW18G080383.1/OALW18G078336.1/OALW18G082656.1/OMIW190G080309.1/OMI…	250
GO:0006559	L-phenylalanine catabolic process	153/190905	177/383722	8.90221e-25	9.6301e-23	3.91918e-23	OMEM6G017730.1/OMEM6G021359.1/OMEM6G09235.1/OMEM6G09237.1/OMEM6G09239.1/OGRW100G014485.1/OGRW100G014487.1/OGRW100G014490.1/OGRW100G035021.1/OGRW100G038780.1/OGRW100G019297.1/OGRW100G019298.1/OGRW100G019299.1/OGRW100G031718.1/OGRW100G042140.1/OLAW128G014696.1/OLAW128G014697.1/OLAW128G014699.1/OLAW128G033166.1/OLAW128G043496.1/OLAW128G019263.1/OLAW128G019264.1/OLAW128G019266.1/OLAW128G036605.1/OLAW…	153
GO:0140326	NA	198/190905	243/383722	9.97673e-25	1.01929e-22	4.14822e-23	OMEM6G016372.1/OMEM6G016591.1/OMEM6G038493.1/OGRW100G033831.1/OGRW100G074033.1/OGRW100G030588.1/OGRW100G076381.1/OLAW128G031908.1/OLAW128G076984.1/OLAW128G035437.1/OLAW128G074360.1/OMAW171G035619.1/OMAW171G079074.1/OMAW171G031936.1/OMAW171G076125.1/OALW18G030765.1/OALW18G074996.1/OALW18G034495.1/OALW18G077542.1/OMIW190G035990.1/OMIW190G079515.1/OMIW190G076557.1/OAUW26G017473.1/OAUW26G039805.1/OOF…	198
GO:0070588	calcium ion transmembrane transport	187/190905	229/383722	1.17084e-23	1.13325e-21	4.61199e-22	OMEM6G011152.1/OMEM6G041628.1/OGRW100G024160.1/OGRW100G079475.1/OGRW100G027881.1/OGRW100G081627.1/OLAW128G028861.1/OLAW128G082724.1/OLAW128G023907.1/OLAW128G080242.1/OMAW171G029160.1/OMAW171G082423.1/OMAW171G084855.1/OALW18G024595.1/OALW18G080819.1/OALW18G028492.1/OALW18G083089.1/OMIW190G024254.1/OMIW190G085454.1/OMIW190G029273.1/OMIW190G082966.1/OAUW26G014471.1/OAUW26G043071.1/OOFW323G014656.1/O…	187
GO:0030126	COPI vesicle coat	231/190905	297/383722	2.70203e-23	2.48451e-21	1.01113e-21	OMEM6G011758.1/OGRW100G024828.1/OGRW100G024831.1/OGRW100G063583.1/OGRW100G028505.1/OGRW100G028507.1/OGRW100G066009.1/OLAW128G029589.1/OLAW128G029596.1/OLAW128G066072.1/OLAW128G024526.1/OLAW128G024528.1/OLAW128G063683.1/OMAW171G029813.1/OMAW171G029814.1/OMAW171G081535.1/OMAW171G024784.1/OMAW171G024788.1/OMAW171G067443.1/OALW18G025318.1/OALW18G025322.1/OALW18G066546.1/OALW18G029156.1/OALW18G029158.…	231
GO:0008878	glucose-1-phosphate adenylyltransFtrase activity	115/190905	127/383722	8.28853e-23	6.92846e-21	2.81969e-21	OMEM6G030885.1/OMEM6G033001.1/OGRW100G059288.1/OGRW100G063948.1/OGRW100G061975.1/OGRW100G066390.1/OLAW128G061598.1/OLAW128G066434.1/OLAW128G059200.1/OLAW128G064021.1/OMAW171G063182.1/OMAW171G065360.1/OMAW171G060258.1/OMAW171G067827.1/OALW18G059740.1/OALW18G066913.1/OALW18G062406.1/OALW18G064416.1/OMIW190G060526.1/OMIW190G068239.1/OMIW190G063536.1/OMIW190G065621.1/OAUW26G032165.1/OAUW26G034243.1/O…	115
GO:0009360	DNA polymerase III complex	115/190905	127/383722	8.28853e-23	6.92846e-21	2.81969e-21	OMEM6G017445.1/OGRW100G078123.1/OGRW100G081006.1/OLAW128G081718.1/OLAW128G079344.1/OMAW171G081431.1/OMAW171G083950.1/OALW18G079390.1/OALW18G082401.1/OMIW190G084462.1/OMIW190G081811.1/OAUW26G032561.1/OAUW26G042065.1/OOFW323G042844.1/OPUW363G081314.1/OPUW363G083891.1/ORHW375G043199.1/OBRW59G036609.1/OEIW71G043231.1/OGLW97G0043769.1/OMEM6G024722.1/OGRW100G078394.1/OGRW100G080505.1/OLAW128G081397.1/O…	115
GO:0006002	fructose 6-phosphate metabolic process	194/190905	242/383722	1.25643e-22	1.0046e-20	4.08843e-21	OPUW363G044274.1/OMEM6G031308.1/OMEM6G033478.1/OGRW100G059728.1/OGRW100G064491.1/OGRW100G062385.1/OGRW100G066869.1/OLAW128G062495.1/OLAW128G067008.1/OLAW128G059589.1/OLAW128G064528.1/OMAW171G063695.1/OMAW171G065997.1/OMAW171G060728.1/OMAW171G068382.1/OALW18G060199.1/OALW18G067458.1/OALW18G062851.1/OALW18G064901.1/OMIW190G061002.1/OMIW190G068862.1/OMIW190G064033.1/OMIW190G066157.1/OAUW26G032648.1/…	194
GO:0016036	cellular response to phosphate starvation	114/190905	126/383722	1.51046e-22	1.15739e-20	4.71025e-21	OMEM6G07247.1/OGRW100G012463.1/OGRW100G016951.1/OLAW128G012606.1/OLAW128G017247.1/OMAW171G017144.1/OMAW171G012576.1/OALW18G017673.1/OALW18G012876.1/OMIW190G012551.1/OMIW190G017431.1/OAUW26G07098.1/OOFW323G07935.1/OPUW363G012428.1/OPUW363G017080.1/ORHW375G06876.1/OBRW59G06652.1/OEIW71G07065.1/OGLW97G007140.1/OMEM6G012683.1/OGRW100G025807.1/OGRW100G029429.1/OLAW128G030620.1/OLAW128G025442.1/OMAW171…	114
GO:0005200	structural constituent of cytoskeleton	206/190905	261/383722	2.34004e-22	1.72134e-20	7.00535e-21	OMEM6G011405.1/OMEM6G012282.1/OMEM6G012991.1/OMEM6G02117.1/OMEM6G025831.1/OMEM6G04845.1/OMEM6G06918.1/OGRW100G010075.1/OGRW100G012145.1/OGRW100G021096.1/OGRW100G024435.1/OGRW100G025392.1/OGRW100G038693.1/OGRW100G046292.1/OGRW100G05628.1/OGRW100G01503.1/OGRW100G016657.1/OGRW100G026631.1/OGRW100G028163.1/OGRW100G029023.1/OGRW100G04120.1/OGRW100G050525.1/OLAW128G010008.1/OLAW128G012256.1/OLAW128G025…	206
GO:0006568	tryptophan metabolic process	166/190905	201/383722	3.38852e-22	2.39673e-20	9.754e-21	OMEM6G012432.1/OMEM6G025847.1/OGRW100G025537.1/OGRW100G025538.1/OGRW100G025544.1/OGRW100G029176.1/OLAW128G030360.1/OLAW128G025185.1/OMAW171G030460.1/OMAW171G030461.1/OMAW171G025517.1/OALW18G026048.1/OALW18G026058.1/OALW18G026062.1/OALW18G026064.1/OALW18G029849.1/OMIW190G025632.1/OMIW190G025641.1/OMIW190G030760.1/OAUW26G015918.1/OOFW323G016088.1/OOFW323G016093.1/OPUW363G025281.1/OPUW363G030180.1/O…	166
GO:0016308	1-phosphatidylinositol-4-phosphate 5-kinase activity	112/190905	124/383722	5.00387e-22	3.40819e-20	1.38704e-20	OMEM6G037437.1/OMEM6G040009.1/OGRW100G072980.1/OGRW100G075503.1/OGRW100G080200.1/OLAW128G075838.1/OLAW128G080981.1/OLAW128G073448.1/OLAW128G078721.1/OMAW171G077918.1/OMAW171G080707.1/OMAW171G075065.1/OMAW171G083211.1/OALW18G073919.1/OALW18G076593.1/OMIW190G078372.1/OMIW190G083712.1/OMIW190G075433.1/OMIW190G081081.1/OAUW26G038907.1/OAUW26G041252.1/OOFW323G038920.1/OOFW323G042046.1/OPUW363G080555.1…	112
GO:0004427	inorganic diphosphatase activity	240/190905	315/383722	5.87544e-22	3.8589e-20	1.57047e-20	OMEM6G019097.1/OMEM6G019279.1/OMEM6G021439.1/OMEM6G05357.1/OMEM6G06213.1/OGRW100G010563.1/OGRW100G036446.1/OGRW100G036645.1/OGRW100G038847.1/OGRW100G054696.1/OGRW100G071286.1/OGRW100G040274.1/OGRW100G042200.1/OGRW100G04581.1/OGRW100G05428.1/OLAW128G010525.1/OLAW128G011443.1/OLAW128G034637.1/OLAW128G041438.1/OLAW128G043563.1/OLAW128G069613.1/OLAW128G037934.1/OLAW128G038126.1/OLAW128G039966.1/OLAW1…	240
GO:0005978	glycogen biosynthetic process	172/190905	211/383722	1.00497e-21	6.37288e-20	2.59358e-20	OMEM6G030885.1/OMEM6G033001.1/OGRW100G059288.1/OGRW100G063948.1/OGRW100G061975.1/OGRW100G066390.1/OLAW128G061598.1/OLAW128G066434.1/OLAW128G059200.1/OLAW128G064021.1/OMAW171G063182.1/OMAW171G065360.1/OMAW171G060258.1/OMAW171G067827.1/OALW18G059740.1/OALW18G066913.1/OALW18G062406.1/OALW18G064416.1/OMIW190G060526.1/OMIW190G068239.1/OMIW190G063536.1/OMIW190G065621.1/OAUW26G032165.1/OAUW26G034243.1/O…	172
GO:0016575	histone deacetylation	152/190905	182/383722	2.04714e-21	1.2549e-19	5.10708e-20	OMEM6G03227.1/OMEM6G037800.1/OGRW100G073352.1/OGRW100G08374.1/OGRW100G02553.1/OGRW100G076061.1/OLAW128G076246.1/OLAW128G02452.1/OLAW128G073982.1/OMAW171G02583.1/OMAW171G075471.1/OMAW171G08447.1/OALW18G074304.1/OALW18G08594.1/OALW18G02566.1/OALW18G077177.1/OMIW190G02581.1/OMIW190G02583.1/OMIW190G078746.1/OMIW190G075876.1/OAUW26G039260.1/OOFW323G03069.1/OOFW323G039312.1/OPUW363G075333.1/OPUW363G084…	152
GO:0006270	DNA replication initiation	188/190905	236/383722	2.1919e-21	1.30029e-19	5.29182e-20	OMEM6G037308.1/OMEM6G039866.1/OGRW100G072824.1/OGRW100G077700.1/OGRW100G075388.1/OGRW100G080065.1/OLAW128G075689.1/OLAW128G080808.1/OLAW128G073334.1/OLAW128G078595.1/OMAW171G077763.1/OMAW171G080574.1/OMAW171G074919.1/OMAW171G083056.1/OALW18G073759.1/OALW18G078954.1/OALW18G076473.1/OALW18G081416.1/OMIW190G078215.1/OMIW190G083568.1/OMIW190G075286.1/OMIW190G080918.1/OAUW26G038795.1/OAUW26G041131.1/O…	188
GO:0019773	proteasome core complex, alpha-subunit complex	206/190905	264/383722	2.97777e-21	1.71129e-19	6.96446e-20	OMAW171G066189.1/OPUW363G068494.1/OMEM6G021776.1/OMEM6G04872.1/OGRW100G010096.1/OGRW100G039237.1/OGRW100G04146.1/OGRW100G042558.1/OLAW128G010041.1/OLAW128G043981.1/OLAW128G040340.1/OLAW128G04069.1/OMAW171G04298.1/OMAW171G044319.1/OMAW171G010178.1/OMAW171G040907.1/OALW18G010301.1/OALW18G039334.1/OALW18G04214.1/OALW18G042773.1/OMIW190G04306.1/OMIW190G044679.1/OMIW190G010286.1/OMIW190G041183.1/OAUW2…	206
GO:0043022	ribosome binding	187/190905	237/383722	2.05736e-20	1.14651e-18	4.66598e-19	OMEM6G012087.1/OMEM6G028650.1/OMEM6G041251.1/OGRW100G025231.1/OGRW100G051099.1/OGRW100G053590.1/OGRW100G079096.1/OGRW100G028873.1/OGRW100G054858.1/OGRW100G057067.1/OGRW100G081280.1/OLAW128G030029.1/OLAW128G051702.1/OLAW128G054337.1/OLAW128G082294.1/OLAW128G024884.1/OLAW128G055205.1/OLAW128G057328.1/OLAW128G079881.1/OMAW171G030216.1/OMAW171G055559.1/OMAW171G058055.1/OMAW171G081954.1/OMAW171G025203…	187
GO:0005471	ATP:ADP antiporter activity	141/190905	168/383722	2.23177e-20	1.20712e-18	4.91265e-19	OMEM6G039773.1/OGRW100G072721.1/OGRW100G077595.1/OGRW100G075300.1/OLAW128G075597.1/OLAW128G080697.1/OLAW128G073254.1/OMAW171G077668.1/OMAW171G080476.1/OMAW171G074813.1/OALW18G073638.1/OALW18G078852.1/OALW18G076382.1/OMIW190G078122.1/OMIW190G083478.1/OMIW190G075183.1/OMIW190G080802.1/OAUW26G038703.1/OOFW323G038523.1/OOFW323G038664.1/OOFW323G041755.1/OPUW363G080340.1/OPUW363G077375.1/OBRW59G033418.…	141
GO:0006081	cellular aldehyde metabolic process	97/190905	106/383722	2.83596e-20	1.49009e-18	6.06425e-19	OMEM6G09361.1/OMEM6G09364.1/OGRW100G014638.1/OGRW100G014640.1/OGRW100G019432.1/OGRW100G019438.1/OLAW128G014840.1/OLAW128G014845.1/OLAW128G019400.1/OLAW128G019402.1/OMAW171G019425.1/OMAW171G019428.1/OMAW171G014690.1/OMAW171G014696.1/OALW18G019861.1/OALW18G019863.1/OALW18G015064.1/OALW18G015071.1/OMIW190G014806.1/OMIW190G014813.1/OMIW190G019630.1/OMIW190G019636.1/OAUW26G09558.1/OOFW323G010104.1/OOF…	97
GO:0051276	chromosome organization	105/190905	117/383722	3.22227e-20	1.64604e-18	6.69892e-19	OMEM6G06675.1/OGRW100G011879.1/OGRW100G016399.1/OGRW100G016401.1/OLAW128G011962.1/OLAW128G016708.1/OLAW128G016711.1/OMAW171G016561.1/OMAW171G011923.1/OALW18G017088.1/OALW18G012315.1/OMIW190G011953.1/OMIW190G016771.1/OAUW26G06517.1/OOFW323G07263.1/OPUW363G011815.1/OPUW363G016496.1/ORHW375G021299.1/ORHW375G06254.1/OBRW59G06141.1/OEIW71G021427.1/OGLW97G006528.1/OMEM6G032321.1/OGRW100G079850.1/OGRW10…	105
GO:0007094	mitotic spindle assembly checkpoint	112/190905	127/383722	4.79405e-20	2.38277e-18	9.69721e-19	OMEM6G037319.1/OGRW100G072829.1/OGRW100G077704.1/OGRW100G080068.1/OLAW128G075694.1/OLAW128G080811.1/OLAW128G073338.1/OLAW128G078599.1/OMAW171G077767.1/OMAW171G080581.1/OMAW171G074923.1/OMAW171G083059.1/OALW18G073764.1/OALW18G078958.1/OALW18G081420.1/OMIW190G078219.1/OMIW190G083576.1/OMIW190G075291.1/OMIW190G080923.1/OAUW26G038799.1/OAUW26G041135.1/OOFW323G038776.1/OOFW323G041878.1/OPUW363G074753.…	112
GO:0000155	phosphorelay sensor kinase activity	205/190905	266/383722	5.22652e-20	2.52936e-18	1.02938e-18	OMEM6G023361.1/OMEM6G037760.1/OGRW100G037339.1/OGRW100G044045.1/OGRW100G048396.1/OLAW128G042218.1/OLAW128G045575.1/OLAW128G038806.1/OLAW128G049057.1/OMAW171G045845.1/OMAW171G039176.1/OMAW171G049312.1/OALW18G037553.1/OALW18G047553.1/OALW18G044327.1/OMIW190G046165.1/OMIW190G039480.1/OMIW190G049673.1/OAUW26G024421.1/OAUW26G024448.1/OAUW26G025127.1/OOFW323G020967.1/OOFW323G024314.1/OPUW363G038841.1/O…	205
GO:0007020	microtubule nucleation	114/190905	130/383722	6.2531e-20	2.94858e-18	1.19999e-18	OMEM6G041688.1/OGRW100G013782.1/OGRW100G013783.1/OGRW100G018542.1/OLAW128G013905.1/OLAW128G018516.1/OMAW171G013792.1/OALW18G018977.1/OALW18G014155.1/OMIW190G018680.1/OAUW26G08612.1/OOFW323G09195.1/OPUW363G018324.1/ORHW375G08138.1/OBRW59G037430.1/OEIW71G08398.1/OGLW97G0045080.1/OMEM6G018102.1/OGRW100G035403.1/OGRW100G032072.1/OLAW128G033577.1/OLAW128G036953.1/OMAW171G037274.1/OMAW171G073793.1/OALW…	114
GO:0006108	malate metabolic process	167/190905	208/383722	7.98623e-20	3.58212e-18	1.45782e-18	OMEM6G022551.1/OMEM6G03659.1/OGRW100G039962.1/OGRW100G08820.1/OGRW100G02961.1/OGRW100G043228.1/OLAW128G044717.1/OLAW128G08720.1/OLAW128G02852.1/OLAW128G041027.1/OMAW171G03039.1/OMAW171G045012.1/OMAW171G041645.1/OMAW171G09054.1/OALW18G040095.1/OALW18G09036.1/OALW18G03007.1/OALW18G043493.1/OMIW190G03044.1/OMIW190G045364.1/OMIW190G041947.1/OMIW190G09097.1/OAUW26G023642.1/OAUW26G03283.1/OOFW323G02338…	167
GO:0016615	malate dehydrogenase activity	167/190905	208/383722	7.98623e-20	3.58212e-18	1.45782e-18	OMEM6G022551.1/OMEM6G03659.1/OGRW100G039962.1/OGRW100G08820.1/OGRW100G02961.1/OGRW100G043228.1/OLAW128G044717.1/OLAW128G08720.1/OLAW128G02852.1/OLAW128G041027.1/OMAW171G03039.1/OMAW171G045012.1/OMAW171G041645.1/OMAW171G09054.1/OALW18G040095.1/OALW18G09036.1/OALW18G03007.1/OALW18G043493.1/OMIW190G03044.1/OMIW190G045364.1/OMIW190G041947.1/OMIW190G09097.1/OAUW26G023642.1/OAUW26G03283.1/OOFW323G02338…	167
GO:0003887	DNA-directed DNA polymerase activity	270/190905	371/383722	1.35528e-19	5.93421e-18	2.41506e-18	OMEM6G011151.1/OGRW100G024160.1/OGRW100G027881.1/OLAW128G028861.1/OLAW128G023907.1/OMAW171G029160.1/OMAW171G024060.1/OALW18G024595.1/OALW18G028492.1/OMIW190G024254.1/OMIW190G029273.1/OAUW26G014470.1/OOFW323G014656.1/OPUW363G023932.1/OPUW363G028785.1/ORHW375G014034.1/OBRW59G012872.1/OEIW71G014044.1/OGLW97G0014142.1/OMEM6G029981.1/OGRW100G058366.1/OGRW100G061190.1/OLAW128G061111.1/OLAW128G058526.1/…	270
GO:0000027	ribosomal large subunit assembly	93/190905	102/383722	3.24504e-19	1.38782e-17	5.64804e-18	OMIW190G078066.1/OBRW59G035719.1/OEIW71G039073.1/OGLW97G0039361.1/OMEM6G021909.1/OMEM6G030060.1/OGRW100G039359.1/OGRW100G07976.1/OGRW100G02176.1/OGRW100G042691.1/OLAW128G044109.1/OLAW128G07827.1/OLAW128G02059.1/OLAW128G040464.1/OMAW171G02206.1/OMAW171G044452.1/OMAW171G041027.1/OMAW171G08071.1/OALW18G039455.1/OALW18G08172.1/OALW18G02191.1/OALW18G042902.1/OMIW190G02186.1/OMIW190G044813.1/OMIW190G04…	93
GO:0003872	6-phosphofructokinase activity	240/190905	324/383722	3.3475e-19	1.3991e-17	5.69395e-18	OPUW363G044274.1/OMEM6G031308.1/OMEM6G033478.1/OGRW100G059728.1/OGRW100G064491.1/OGRW100G062385.1/OGRW100G066869.1/OLAW128G062495.1/OLAW128G067008.1/OLAW128G059589.1/OLAW128G064528.1/OMAW171G063695.1/OMAW171G065997.1/OMAW171G060728.1/OMAW171G068382.1/OALW18G060199.1/OALW18G067458.1/OALW18G062851.1/OALW18G064901.1/OMIW190G061002.1/OMIW190G068862.1/OMIW190G064033.1/OMIW190G066157.1/OAUW26G032648.1/…	240
GO:0031369	translation initiation factor binding	97/190905	108/383722	7.69441e-19	3.14445e-17	1.2797e-17	OMEM6G031319.1/OMEM6G06563.1/OGRW100G011792.1/OGRW100G051209.1/OGRW100G016295.1/OGRW100G054941.1/OLAW128G011869.1/OLAW128G051829.1/OLAW128G016624.1/OLAW128G055299.1/OMAW171G016467.1/OMAW171G055665.1/OMAW171G011818.1/OMAW171G052298.1/OALW18G016998.1/OALW18G051608.1/OALW18G012214.1/OALW18G055296.1/OMIW190G011861.1/OMIW190G052660.1/OMIW190G055989.1/OAUW26G027616.1/OAUW26G06420.1/OOFW323G027458.1/OOF…	97
GO:0016841	ammonia-lyase activity	134/190905	161/383722	8.58446e-19	3.43192e-17	1.39669e-17	OMEM6G017730.1/OMEM6G021359.1/OMEM6G09235.1/OMEM6G09237.1/OMEM6G09239.1/OGRW100G014485.1/OGRW100G014487.1/OGRW100G014490.1/OGRW100G035021.1/OGRW100G038780.1/OGRW100G019297.1/OGRW100G019298.1/OGRW100G019299.1/OGRW100G031718.1/OGRW100G042140.1/OLAW128G014696.1/OLAW128G014697.1/OLAW128G014699.1/OLAW128G033166.1/OLAW128G043496.1/OLAW128G019263.1/OLAW128G019264.1/OLAW128G019266.1/OLAW128G036605.1/OLAW…	134
GO:0008278	cohesin complex	98/190905	110/383722	1.98066e-18	7.66109e-17	3.11785e-17	OMEM6G032321.1/OGRW100G079850.1/OGRW100G05456.1/OGRW100G081960.1/OLAW128G083160.1/OLAW128G080582.1/OMAW171G082818.1/OMAW171G085265.1/OALW18G081209.1/OALW18G05591.1/OALW18G083441.1/OMIW190G085845.1/OMIW190G083365.1/OAUW26G043434.1/OOFW323G044155.1/OPUW363G082730.1/OPUW363G085283.1/ORHW375G044580.1/OBRW59G037708.1/OEIW71G044678.1/OGLW97G0045347.1/OMEM6G022629.1/OGRW100G039995.1/OGRW100G043257.1/OGR…	98
GO:0019318	hexose metabolic process	90/190905	99/383722	1.99963e-18	7.66109e-17	3.11785e-17	OMEM6G035027.1/OGRW100G070665.1/OGRW100G068360.1/OLAW128G069044.1/OLAW128G071217.1/OMAW171G070078.1/OALW18G069274.1/OALW18G071564.1/OMIW190G072924.1/OMIW190G070460.1/OAUW26G036299.1/OOFW323G036319.1/OPUW363G072386.1/OPUW363G069881.1/ORHW375G036603.1/OBRW59G031385.1/OEIW71G036785.1/OGLW97G0037151.1/OMEM6G015153.1/OGRW100G023290.1/OGRW100G027174.1/OLAW128G028060.1/OLAW128G023137.1/OMAW171G028382.1/…	90
GO:0005985	sucrose metabolic process	189/190905	246/383722	2.59648e-18	9.58551e-17	3.90103e-17	OMEM6G025579.1/OMEM6G07080.1/OGRW100G012299.1/OGRW100G046073.1/OGRW100G016802.1/OGRW100G050298.1/OLAW128G012436.1/OLAW128G047701.1/OLAW128G017106.1/OLAW128G050912.1/OMAW171G016982.1/OMAW171G047920.1/OMAW171G012372.1/OMAW171G051340.1/OALW18G017349.1/OALW18G049589.1/OALW18G012736.1/OALW18G046186.1/OMIW190G012398.1/OMIW190G048277.1/OMIW190G017248.1/OMIW190G051726.1/OAUW26G026709.1/OAUW26G06931.1/OOF…	189
GO:0016639	oxidoreductase activity, acting on the CH-NH2 group of donors, NAD or NADP as acceptor	105/190905	120/383722	2.60618e-18	9.58551e-17	3.90103e-17	OMEM6G017914.1/OMEM6G09384.1/OGRW100G035214.1/OGRW100G019461.1/OLAW128G033372.1/OLAW128G019418.1/OMAW171G019447.1/OMAW171G037076.1/OMAW171G014715.1/OMAW171G033307.1/OALW18G032232.1/OALW18G015092.1/OALW18G035874.1/OMIW190G014837.1/OMIW190G037445.1/OMIW190G019653.1/OMIW190G034227.1/OAUW26G018922.1/OAUW26G09579.1/OOFW323G010128.1/OOFW323G018738.1/OPUW363G014251.1/OPUW363G036721.1/OPUW363G019298.1/OP…	105
GO:0004721	phosphoprotein phosphatase activity	185/190905	240/383722	3.16031e-18	1.13957e-16	4.63773e-17	OMEM6G011304.1/OGRW100G024332.1/OGRW100G028070.1/OGRW100G081822.1/OLAW128G029053.1/OLAW128G024064.1/OLAW128G080423.1/OMAW171G029343.1/OMAW171G082636.1/OMAW171G024246.1/OALW18G024780.1/OALW18G028672.1/OALW18G083296.1/OMIW190G024449.1/OMIW190G085670.1/OMIW190G029481.1/OAUW26G014700.1/OAUW26G043280.1/OOFW323G014841.1/OPUW363G024113.1/OPUW363G082555.1/OPUW363G028949.1/ORHW375G014229.1/OBRW59G012997.1…	185
GO:0004407	histone deacetylase activity	133/190905	161/383722	4.19722e-18	1.48436e-16	6.04094e-17	OMEM6G03227.1/OMEM6G037800.1/OGRW100G073352.1/OGRW100G08374.1/OGRW100G02553.1/OGRW100G076061.1/OLAW128G076246.1/OLAW128G02452.1/OLAW128G073982.1/OMAW171G02583.1/OMAW171G075471.1/OMAW171G08447.1/OALW18G074304.1/OALW18G08594.1/OALW18G02566.1/OALW18G077177.1/OMIW190G02581.1/OMIW190G02583.1/OMIW190G078746.1/OMIW190G075876.1/OAUW26G039260.1/OOFW323G03069.1/OOFW323G039312.1/OPUW363G075333.1/OPUW363G084…	133
GO:0015165	pyrimidine nucleotide-sugar transmembrane transporter activity	111/190905	129/383722	4.77226e-18	1.62522e-16	6.61418e-17	OMEM6G017501.1/OGRW100G034792.1/OGRW100G019129.1/OGRW100G031497.1/OLAW128G014488.1/OLAW128G032932.1/OLAW128G019122.1/OLAW128G036378.1/OMAW171G019112.1/OMAW171G036662.1/OMAW171G014332.1/OMAW171G032915.1/OALW18G031769.1/OALW18G014764.1/OALW18G035444.1/OMIW190G014491.1/OMIW190G037019.1/OMIW190G019267.1/OMIW190G033297.1/OAUW26G018487.1/OAUW26G09239.1/OOFW323G018321.1/OOFW323G09795.1/OPUW363G014363.1/…	111
GO:0090481	pyrimidine nucleotide-sugar transmembrane transport	111/190905	129/383722	4.77226e-18	1.62522e-16	6.61418e-17	OMEM6G017501.1/OGRW100G034792.1/OGRW100G019129.1/OGRW100G031497.1/OLAW128G014488.1/OLAW128G032932.1/OLAW128G019122.1/OLAW128G036378.1/OMAW171G019112.1/OMAW171G036662.1/OMAW171G014332.1/OMAW171G032915.1/OALW18G031769.1/OALW18G014764.1/OALW18G035444.1/OMIW190G014491.1/OMIW190G037019.1/OMIW190G019267.1/OMIW190G033297.1/OAUW26G018487.1/OAUW26G09239.1/OOFW323G018321.1/OOFW323G09795.1/OPUW363G014363.1/…	111
GO:0046524	sucrose-phosphate synthase activity	96/190905	108/383722	6.36455e-18	2.12807e-16	8.66066e-17	OMEM6G025579.1/OMEM6G07080.1/OGRW100G012299.1/OGRW100G046073.1/OGRW100G016802.1/OGRW100G050298.1/OLAW128G012436.1/OLAW128G047701.1/OLAW128G017106.1/OLAW128G050912.1/OMAW171G016982.1/OMAW171G047920.1/OMAW171G012372.1/OMAW171G051340.1/OALW18G017349.1/OALW18G049589.1/OALW18G012736.1/OALW18G046186.1/OMIW190G012398.1/OMIW190G048277.1/OMIW190G017248.1/OMIW190G051726.1/OAUW26G026709.1/OAUW26G06931.1/OOF…	96
GO:0004834	tryptophan synthase activity	108/190905	125/383722	6.9573e-18	2.28473e-16	9.2982e-17	OMEM6G012432.1/OMEM6G025847.1/OGRW100G025537.1/OGRW100G025538.1/OGRW100G025544.1/OGRW100G029176.1/OLAW128G030360.1/OLAW128G025185.1/OMAW171G030460.1/OMAW171G030461.1/OMAW171G025517.1/OALW18G026048.1/OALW18G026058.1/OALW18G026062.1/OALW18G026064.1/OALW18G029849.1/OMIW190G025632.1/OMIW190G025641.1/OMIW190G030760.1/OAUW26G015918.1/OOFW323G016088.1/OOFW323G016093.1/OPUW363G025281.1/OPUW363G030180.1/O…	108
GO:0003995	acyl-CoA dehydrogenase activity	80/190905	87/383722	2.84364e-17	9.17449e-16	3.73376e-16	OMEM6G01388.1/OMEM6G019669.1/OGRW100G037055.1/OGRW100G045280.1/OGRW100G047295.1/OGRW100G040664.1/OGRW100G049450.1/OGRW100G0574.1/OGRW100G0598.1/OLAW128G041913.1/OLAW128G06014.1/OLAW128G038490.1/OLAW128G0467.1/OLAW128G0496.1/OLAW128G050148.1/OMAW171G042373.1/OMAW171G047061.1/OMAW171G047065.1/OMAW171G0479.1/OMAW171G038958.1/OMAW171G050448.1/OMAW171G06347.1/OMAW171G06348.1/OALW18G037246.1/OALW18G048…	80
GO:0016853	isomerase activity	264/190905	371/383722	4.27562e-17	1.35567e-15	5.51718e-16	OMEM6G033103.1/OGRW100G064073.1/OGRW100G066511.1/OLAW128G066580.1/OLAW128G064135.1/OMAW171G065501.1/OMAW171G067958.1/OALW18G067041.1/OALW18G064527.1/OMIW190G068380.1/OMIW190G065754.1/OAUW26G034379.1/OOFW323G034142.1/OPUW363G067831.1/OPUW363G065148.1/ORHW375G034492.1/OBRW59G029630.1/OEIW71G034761.1/OGLW97G0034936.1/OMEM6G022501.1/OGRW100G039904.1/OGRW100G08895.1/OGRW100G03031.1/OGRW100G043179.1/OL…	264
GO:0043015	gamma-tubulin binding	100/190905	115/383722	4.37159e-17	1.3626e-15	5.54541e-16	OMEM6G041688.1/OGRW100G013782.1/OGRW100G013783.1/OGRW100G018542.1/OLAW128G013905.1/OLAW128G018516.1/OMAW171G018494.1/OMAW171G013792.1/OALW18G018977.1/OALW18G014155.1/OMIW190G013911.1/OMIW190G018680.1/OAUW26G08612.1/OOFW323G09195.1/OPUW363G013653.1/OPUW363G018324.1/ORHW375G08138.1/OBRW59G037430.1/OEIW71G08398.1/OGLW97G0045080.1/OGLW97G008441.1/OMEM6G018102.1/OGRW100G035403.1/OGRW100G032072.1/OLAW1…	100
GO:0010468	regulation of gene expression	238/190905	329/383722	6.06073e-17	1.85761e-15	7.55997e-16	OMEM6G015094.1/OMEM6G015095.1/OGRW100G023219.1/OGRW100G023220.1/OGRW100G027116.1/OLAW128G027984.1/OLAW128G023077.1/OMAW171G028311.1/OMAW171G023209.1/OMAW171G023210.1/OALW18G023630.1/OALW18G027714.1/OMIW190G023394.1/OMIW190G023395.1/OMIW190G028421.1/OMIW190G028422.1/OAUW26G013452.1/OAUW26G013453.1/OAUW26G013454.1/OOFW323G013854.1/OPUW363G023103.1/OPUW363G027985.1/OPUW363G027986.1/ORHW375G013085.1/…	238
GO:0009231	riboflavin biosynthetic process	151/190905	191/383722	6.36539e-17	1.91901e-15	7.80982e-16	OMEM6G019671.1/OMEM6G036038.1/OGRW100G069399.1/OLAW128G072233.1/OMAW171G073772.1/OALW18G072613.1/OMIW190G074126.1/OAUW26G037624.1/OOFW323G036760.1/OPUW363G073614.1/OPUW363G070300.1/ORHW375G037085.1/OBRW59G024371.1/OBRW59G06970.1/OGLW97G0038436.1/OMEM6G013116.1/OMEM6G037054.1/OMEM6G037070.1/OGRW100G021215.1/OGRW100G032907.1/OGRW100G05736.1/OGRW100G030006.1/OGRW100G04836.1/OLAW128G025855.1/OLAW128G…	151
GO:0003955	NAD(P)H dehydrogenase (quinone) activity	92/190905	104/383722	6.48303e-17	1.92295e-15	7.82586e-16	OMEM6G021869.1/OMEM6G04718.1/OGRW100G039331.1/OGRW100G09957.1/OGRW100G03997.1/OGRW100G042656.1/OLAW128G044076.1/OLAW128G09883.1/OLAW128G03895.1/OLAW128G040428.1/OMAW171G04135.1/OMAW171G044407.1/OMAW171G010029.1/OMAW171G040989.1/OALW18G010163.1/OALW18G039424.1/OALW18G04057.1/OALW18G042869.1/OMIW190G04134.1/OMIW190G044769.1/OMIW190G010143.1/OMIW190G041270.1/OAUW26G023024.1/OOFW323G022731.1/OOFW323G…	92
GO:0015914	phospholipid transport	198/190905	265/383722	8.51642e-17	2.48598e-15	1.01173e-15	OMEM6G016372.1/OMEM6G016591.1/OMEM6G038493.1/OGRW100G033831.1/OGRW100G074033.1/OGRW100G030588.1/OGRW100G076381.1/OLAW128G031908.1/OLAW128G076984.1/OLAW128G035437.1/OLAW128G074360.1/OMAW171G035619.1/OMAW171G079074.1/OMAW171G031936.1/OMAW171G076125.1/OALW18G030765.1/OALW18G074996.1/OALW18G034495.1/OALW18G077542.1/OMIW190G035990.1/OMIW190G079515.1/OMIW190G076557.1/OAUW26G017473.1/OAUW26G039805.1/OOF…	198
GO:0050664	oxidoreductase activity, acting on NAD(P)H, oxygen as acceptor	154/190905	196/383722	8.90672e-17	2.55929e-15	1.04156e-15	OMEM6G04280.1/OGRW100G09487.1/OGRW100G03566.1/OLAW128G09394.1/OLAW128G03461.1/OMAW171G03664.1/OMAW171G09568.1/OALW18G09666.1/OALW18G03630.1/OMIW190G03664.1/OMIW190G09657.1/OAUW26G03991.1/OOFW323G04206.1/OPUW363G075057.1/OPUW363G09515.1/OPUW363G03818.1/ORHW375G03885.1/OBRW59G03857.1/OEIW71G04161.1/OGLW97G004221.1/OMEM6G038805.1/OGRW100G074445.1/OGRW100G076753.1/OLAW128G077399.1/OLAW128G074738.1/OM…	154
GO:0005544	calcium-dependent phospholipid binding	187/190905	248/383722	1.20528e-16	3.41001e-15	1.38778e-15	OMEM6G02659.1/OGRW100G07844.1/OGRW100G02058.1/OLAW128G07715.1/OLAW128G01922.1/OMAW171G02093.1/OMAW171G07973.1/OALW18G08048.1/OALW18G02073.1/OMIW190G02083.1/OMIW190G07982.1/OAUW26G02312.1/OOFW323G02610.1/OPUW363G07941.1/OPUW363G02229.1/ORHW375G02295.1/OBRW59G02441.1/OEIW71G02557.1/OGLW97G002490.1/OMEM6G08766.1/OGRW100G013766.1/OGRW100G018533.1/OLAW128G013894.1/OLAW128G018504.1/OMAW171G013782.1/OAL…	187
GO:0000922	spindle pole	95/190905	109/383722	1.90501e-16	5.22883e-15	2.12799e-15	OMEM6G041688.1/OGRW100G013782.1/OGRW100G013783.1/OGRW100G018542.1/OLAW128G013905.1/OLAW128G018516.1/OMAW171G013792.1/OALW18G018977.1/OALW18G014155.1/OMIW190G018680.1/OAUW26G08612.1/OOFW323G09195.1/OPUW363G018324.1/ORHW375G08138.1/OBRW59G037430.1/OEIW71G08398.1/OGLW97G0045080.1/OMEM6G018102.1/OGRW100G035403.1/OGRW100G032072.1/OLAW128G033577.1/OLAW128G036953.1/OMAW171G037274.1/OMAW171G073793.1/OALW…	95
GO:0005815	microtubule organizing center	95/190905	109/383722	1.90501e-16	5.22883e-15	2.12799e-15	OMEM6G041688.1/OGRW100G013782.1/OGRW100G013783.1/OGRW100G018542.1/OLAW128G013905.1/OLAW128G018516.1/OMAW171G013792.1/OALW18G018977.1/OALW18G014155.1/OMIW190G018680.1/OAUW26G08612.1/OOFW323G09195.1/OPUW363G018324.1/ORHW375G08138.1/OBRW59G037430.1/OEIW71G08398.1/OGLW97G0045080.1/OMEM6G018102.1/OGRW100G035403.1/OGRW100G032072.1/OLAW128G033577.1/OLAW128G036953.1/OMAW171G037274.1/OMAW171G073793.1/OALW…	95
GO:0030163	protein catabolic process	241/190905	336/383722	2.0844e-16	5.63707e-15	2.29413e-15	OMEM6G010444.1/OMEM6G023455.1/OGRW100G015700.1/OGRW100G015704.1/OGRW100G044112.1/OGRW100G020590.1/OGRW100G048466.1/OLAW128G045651.1/OLAW128G020483.1/OLAW128G049127.1/OMAW171G020567.1/OMAW171G045909.1/OMAW171G015838.1/OMAW171G049387.1/OALW18G020949.1/OALW18G020953.1/OALW18G047621.1/OALW18G016238.1/OALW18G044403.1/OMIW190G015931.1/OMIW190G046229.1/OMIW190G020765.1/OMIW190G049740.1/OAUW26G010763.1/O…	241
GO:0017176	phosphatidylinositol N-acetylglucosaminyltransFtrase activity	92/190905	105/383722	2.66363e-16	7.09916e-15	2.88916e-15	OMEM6G019693.1/OGRW100G037068.1/OGRW100G047239.1/OGRW100G040680.1/OLAW128G041930.1/OLAW128G06067.1/OLAW128G038504.1/OLAW128G0499.1/OMAW171G042384.1/OMAW171G0544.1/OMAW171G038974.1/OMAW171G06438.1/OALW18G037260.1/OALW18G050778.1/OALW18G040836.1/OMIW190G042498.1/OMIW190G0534.1/OMIW190G039286.1/OMIW190G06391.1/OAUW26G020772.1/OAUW26G0570.1/OOFW323G01021.1/OOFW323G020691.1/OPUW363G038537.1/OPUW363G04…	92
GO:0032259	methylation	290/190905	419/383722	5.27412e-16	1.38559e-14	5.63894e-15	OMEM6G023055.1/OGRW100G043686.1/OGRW100G048059.1/OLAW128G045220.1/OLAW128G048740.1/OMAW171G045501.1/OMAW171G048952.1/OALW18G047177.1/OALW18G043979.1/OMIW190G045819.1/OMIW190G049298.1/OAUW26G024107.1/OOFW323G023938.1/OPUW363G048668.1/OPUW363G045243.1/ORHW375G024006.1/OBRW59G020998.1/OEIW71G024088.1/OGLW97G0023876.1/OMEM6G013365.1/OGRW100G021486.1/OGRW100G046421.1/OGRW100G06029.1/OGRW100G01383.1/OL…	290
GO:0007205	protein kinase C-activating G-protein coupled receptor signaling pathway	136/190905	171/383722	8.70254e-16	2.25408e-14	9.17347e-15	OAUW26G038610.1/OMEM6G041573.1/OGRW100G079417.1/OGRW100G081573.1/OLAW128G082665.1/OLAW128G080192.1/OMAW171G082353.1/OMAW171G084792.1/OALW18G080760.1/OALW18G083027.1/OMIW190G085393.1/OMIW190G082903.1/OAUW26G043009.1/OOFW323G043695.1/OPUW363G082291.1/OPUW363G084816.1/ORHW375G044125.1/OBRW59G037329.1/OEIW71G044228.1/OGLW97G0044869.1/OMEM6G04702.1/OGRW100G09912.1/OGRW100G03987.1/OLAW128G09840.1/OLAW1…	136
GO:0007017	microtubule-based process	321/190905	473/383722	1.18353e-15	3.02293e-14	1.23025e-14	OMEM6G011405.1/OMEM6G012282.1/OMEM6G012991.1/OMEM6G02117.1/OMEM6G025831.1/OMEM6G04845.1/OMEM6G06918.1/OGRW100G010075.1/OGRW100G012145.1/OGRW100G021096.1/OGRW100G024435.1/OGRW100G025392.1/OGRW100G038693.1/OGRW100G046292.1/OGRW100G05628.1/OGRW100G01503.1/OGRW100G016657.1/OGRW100G026631.1/OGRW100G028163.1/OGRW100G029023.1/OGRW100G04120.1/OGRW100G050525.1/OLAW128G010008.1/OLAW128G012256.1/OLAW128G025…	321
GO:0045300	acyl-[acyl-carrier-protein] desaturase activity	137/190905	173/383722	1.32186e-15	3.33e-14	1.35522e-14	OMEM6G05497.1/OGRW100G010689.1/OGRW100G072907.1/OGRW100G04708.1/OLAW128G010645.1/OLAW128G075788.1/OLAW128G04630.1/OMAW171G04896.1/OMAW171G080658.1/OMAW171G075004.1/OALW18G010906.1/OALW18G073849.1/OALW18G04800.1/OMIW190G04895.1/OMIW190G083658.1/OMIW190G075368.1/OAUW26G05245.1/OOFW323G038860.1/OOFW323G05381.1/OPUW363G010684.1/OPUW363G010687.1/OPUW363G080505.1/OPUW363G05008.1/OPUW363G077565.1/ORHW37…	137
GO:0006006	glucose metabolic process	186/190905	250/383722	1.47045e-15	3.65426e-14	1.48718e-14	OMEM6G017468.1/OMEM6G029645.1/OGRW100G014295.1/OGRW100G034759.1/OGRW100G057998.1/OGRW100G019073.1/OGRW100G031464.1/OGRW100G060877.1/OLAW128G014458.1/OLAW128G032901.1/OLAW128G060724.1/OLAW128G019061.1/OLAW128G036344.1/OLAW128G058232.1/OMAW171G019084.1/OMAW171G036630.1/OMAW171G061961.1/OMAW171G014303.1/OMAW171G032884.1/OMAW171G059023.1/OALW18G019519.1/OALW18G031738.1/OALW18G058415.1/OALW18G014689.1…	186
GO:0030131	clathrin adaptor complex	146/190905	187/383722	1.49052e-15	3.65477e-14	1.48739e-14	OMEM6G022257.1/OMEM6G04044.1/OGRW100G039669.1/OGRW100G09225.1/OGRW100G03340.1/OGRW100G042974.1/OLAW128G044415.1/OLAW128G09132.1/OLAW128G03236.1/OLAW128G040762.1/OMAW171G03431.1/OMAW171G044744.1/OMAW171G041367.1/OALW18G039791.1/OALW18G03405.1/OALW18G043215.1/OMIW190G03426.1/OMIW190G045099.1/OMIW190G041649.1/OMIW190G09375.1/OAUW26G023362.1/OAUW26G03718.1/OOFW323G023105.1/OPUW363G040952.1/OPUW363G09…	146
GO:0000226	microtubule cytoskeleton organization	260/190905	371/383722	1.52735e-15	3.69578e-14	1.50408e-14	OGRW100G09090.1/OLAW128G08974.1/OLAW128G040830.1/OMAW171G044820.1/OALW18G09280.1/OMIW190G03309.1/OMIW190G045166.1/OMIW190G08804.1/OAUW26G023437.1/OBRW59G020365.1/OBRW59G03539.1/OEIW71G03755.1/OGLW97G003823.1/OMEM6G014056.1/OMEM6G033715.1/OGRW100G022203.1/OGRW100G064742.1/OGRW100G06731.1/OGRW100G067107.1/OLAW128G026885.1/OLAW128G067277.1/OLAW128G022077.1/OLAW128G064765.1/OMAW171G027266.1/OMAW171G0…	260
GO:0007076	mitotic chromosome condensation	76/190905	84/383722	1.77454e-15	4.23816e-14	1.72481e-14	OMEM6G02928.1/OGRW100G08099.1/OGRW100G02284.1/OLAW128G07974.1/OLAW128G02144.1/OMAW171G02313.1/OMAW171G08167.1/OALW18G08316.1/OALW18G02275.1/OMIW190G02293.1/OMIW190G08157.1/OAUW26G02562.1/OOFW323G02787.1/OPUW363G08151.1/OPUW363G02411.1/ORHW375G02498.1/OBRW59G02658.1/OEIW71G02777.1/OGLW97G002756.1/OMEM6G023934.1/OGRW100G044536.1/OGRW100G048891.1/OLAW128G046150.1/OLAW128G049543.1/OMAW171G046355.1/OM…	76
GO:0016157	sucrose synthase activity	170/190905	225/383722	2.04436e-15	4.81998e-14	1.9616e-14	OMEM6G025579.1/OMEM6G07080.1/OGRW100G012299.1/OGRW100G046073.1/OGRW100G016802.1/OGRW100G050298.1/OLAW128G012436.1/OLAW128G047701.1/OLAW128G017106.1/OLAW128G050912.1/OMAW171G016982.1/OMAW171G047920.1/OMAW171G012372.1/OMAW171G051340.1/OALW18G017349.1/OALW18G049589.1/OALW18G012736.1/OALW18G046186.1/OMIW190G012398.1/OMIW190G048277.1/OMIW190G017248.1/OMIW190G051726.1/OAUW26G026709.1/OAUW26G06931.1/OOF…	170
GO:0006635	fatty acid beta-oxidation	78/190905	87/383722	2.62483e-15	6.03384e-14	2.4556e-14	OMEM6G022786.1/OGRW100G043422.1/OGRW100G05717.1/OGRW100G047790.1/OLAW128G044953.1/OLAW128G021042.1/OLAW128G048490.1/OMAW171G045226.1/OMAW171G048671.1/OALW18G046921.1/OALW18G05814.1/OALW18G043708.1/OMIW190G045571.1/OMIW190G049007.1/OAUW26G023849.1/OOFW323G023644.1/OPUW363G048405.1/OPUW363G044959.1/ORHW375G023716.1/OBRW59G020756.1/OEIW71G023819.1/OGLW97G0023595.1/OMEM6G07672.1/OGRW100G012993.1/OGRW…	78
GO:0042753	positive regulation of circadian rhythm	78/190905	87/383722	2.62483e-15	6.03384e-14	2.4556e-14	OMEM6G033370.1/OGRW100G059365.1/OGRW100G059367.1/OGRW100G062031.1/OLAW128G062084.1/OLAW128G062095.1/OLAW128G062096.1/OLAW128G059250.1/OLAW128G059251.1/OMAW171G063263.1/OMAW171G063265.1/OMAW171G060313.1/OMAW171G060327.1/OALW18G059797.1/OALW18G059817.1/OALW18G059819.1/OALW18G062479.1/OMIW190G060590.1/OMIW190G060605.1/OMIW190G060607.1/OMIW190G063614.1/OMIW190G063625.1/OMIW190G063626.1/OAUW26G032250.…	78
GO:0046961	proton-transporting ATPase activity, rotational mechanism	132/190905	167/383722	5.69352e-15	1.29264e-13	5.26068e-14	OMEM6G025756.1/OMEM6G06984.1/OGRW100G012217.1/OGRW100G046212.1/OGRW100G016716.1/OGRW100G050439.1/OLAW128G012340.1/OLAW128G047858.1/OLAW128G017024.1/OLAW128G051047.1/OMAW171G016906.1/OMAW171G012273.1/OMAW171G051476.1/OALW18G017431.1/OALW18G049721.1/OALW18G012646.1/OALW18G046330.1/OMIW190G012306.1/OMIW190G048423.1/OMIW190G017169.1/OMIW190G051864.1/OAUW26G026848.1/OAUW26G06830.1/OOFW323G026530.1/OOF…	132
GO:0006302	double-strand break repair	74/190905	82/383722	5.88084e-15	1.31889e-13	5.36749e-14	OMEM6G018657.1/OMEM6G029990.1/OGRW100G035990.1/OGRW100G054297.1/OGRW100G058350.1/OGRW100G061203.1/OLAW128G034190.1/OLAW128G061128.1/OLAW128G037516.1/OLAW128G058541.1/OMAW171G037860.1/OMAW171G062346.1/OMAW171G034075.1/OALW18G033031.1/OALW18G054630.1/OALW18G058791.1/OALW18G061712.1/OMIW190G038155.1/OMIW190G059647.1/OMIW190G033403.1/OAUW26G019691.1/OAUW26G031297.1/OOFW323G019521.1/OOFW323G031319.1/O…	74
GO:0004298	threonine-type endopeptidase activity	179/190905	241/383722	6.51458e-15	1.44171e-13	5.86736e-14	OMEM6G031981.1/OMEM6G034171.1/OGRW100G060350.1/OGRW100G065209.1/OGRW100G062985.1/OGRW100G067529.1/OLAW128G063190.1/OLAW128G067710.1/OLAW128G060188.1/OLAW128G065216.1/OMAW171G064392.1/OMAW171G066713.1/OMAW171G061379.1/OMAW171G069081.1/OALW18G060846.1/OALW18G068185.1/OALW18G063487.1/OALW18G065606.1/OMIW190G061733.1/OMIW190G069567.1/OMIW190G064703.1/OMIW190G066855.1/OAUW26G035467.1/OOFW323G033376.1/…	179
GO:0071203	WASH complex	79/190905	89/383722	6.58531e-15	1.44171e-13	5.86736e-14	OAUW26G01309.1/OMEM6G016819.1/OGRW100G034048.1/OGRW100G030797.1/OLAW128G032175.1/OLAW128G035641.1/OMAW171G035906.1/OMAW171G032162.1/OALW18G030995.1/OALW18G034715.1/OMIW190G036269.1/OMIW190G032528.1/OAUW26G017711.1/OAUW26G017713.1/OAUW26G017730.1/OOFW323G017595.1/OPUW363G035610.1/OPUW363G031885.1/ORHW375G017516.1/OBRW59G015551.1/OEIW71G017782.1/OGLW97G0017466.1/OMEM6G011789.1/OGRW100G024860.1/OGRW…	79
GO:0015276	ligand-gated ion channel activity	223/190905	313/383722	8.78623e-15	1.90093e-13	7.73623e-14	OMEM6G023421.1/OMEM6G023423.1/OMEM6G023425.1/OGRW100G044095.1/OGRW100G044097.1/OGRW100G044098.1/OGRW100G048447.1/OLAW128G045630.1/OLAW128G045631.1/OLAW128G045635.1/OLAW128G045636.1/OLAW128G049109.1/OLAW128G049110.1/OLAW128G049111.1/OMAW171G045893.1/OMAW171G045894.1/OMAW171G045896.1/OMAW171G049366.1/OMAW171G049368.1/OMAW171G049370.1/OMAW171G049371.1/OALW18G047602.1/OALW18G047604.1/OALW18G058343.1/…	223
GO:0004540	ribonuclease activity	176/190905	237/383722	1.1198e-14	2.39455e-13	9.74513e-14	OMEM6G039082.1/OMEM6G039083.1/OMEM6G039084.1/OGRW100G074678.1/OGRW100G076979.1/OGRW100G076981.1/OLAW128G077696.1/OLAW128G077697.1/OLAW128G074997.1/OLAW128G074999.1/OLAW128G075000.1/OMAW171G079731.1/OMAW171G079732.1/OMAW171G079733.1/OMAW171G079734.1/OMAW171G076842.1/OALW18G075729.1/OALW18G075730.1/OALW18G078221.1/OALW18G078222.1/OALW18G078223.1/OMIW190G080166.1/OMIW190G080167.1/OMIW190G080168.1/OM…	176
GO:0004143	diacylglycerol kinase activity	136/190905	174/383722	1.16334e-14	2.45905e-13	1.00077e-13	OAUW26G038610.1/OMEM6G041573.1/OGRW100G079417.1/OGRW100G081573.1/OLAW128G082665.1/OLAW128G080192.1/OMAW171G082353.1/OMAW171G084792.1/OALW18G080760.1/OALW18G083027.1/OMIW190G085393.1/OMIW190G082903.1/OAUW26G043009.1/OOFW323G043695.1/OPUW363G082291.1/OPUW363G084816.1/ORHW375G044125.1/OBRW59G037329.1/OEIW71G044228.1/OGLW97G0044869.1/OMEM6G04702.1/OGRW100G09912.1/OGRW100G03987.1/OLAW128G09840.1/OLAW1…	136
GO:0006090	pyruvate metabolic process	92/190905	108/383722	1.27927e-14	2.67337e-13	1.08799e-13	OMEM6G015510.1/OMEM6G021203.1/OGRW100G023642.1/OGRW100G038634.1/OGRW100G027508.1/OGRW100G041980.1/OLAW128G028425.1/OLAW128G043335.1/OLAW128G023502.1/OLAW128G039757.1/OMAW171G028734.1/OMAW171G043706.1/OMAW171G023646.1/OMAW171G040298.1/OALW18G024087.1/OALW18G038726.1/OALW18G028101.1/OALW18G042158.1/OMIW190G023764.1/OMIW190G044057.1/OMIW190G028711.1/OMIW190G040570.1/OAUW26G013941.1/OAUW26G022180.1/O…	92
GO:0008138	protein tyrosine/serine/threonine phosphatase activity	278/190905	406/383722	1.67906e-14	3.46943e-13	1.41196e-13	OMEM6G037381.1/OGRW100G072901.1/OGRW100G077799.1/OGRW100G075442.1/OGRW100G080124.1/OLAW128G080893.1/OLAW128G073388.1/OLAW128G078658.1/OMAW171G077843.1/OMAW171G080653.1/OMAW171G074999.1/OMAW171G083138.1/OALW18G073840.1/OALW18G079044.1/OALW18G076531.1/OALW18G081476.1/OMIW190G078291.1/OMIW190G083653.1/OMIW190G075363.1/OMIW190G080999.1/OAUW26G038851.1/OAUW26G041193.1/OOFW323G038855.1/OOFW323G041964.1…	278
GO:0006897	endocytosis	77/190905	87/383722	2.10135e-14	4.29376e-13	1.74744e-13	OMEM6G010530.1/OMEM6G037688.1/OGRW100G015768.1/OGRW100G073216.1/OGRW100G020659.1/OGRW100G020661.1/OGRW100G075706.1/OLAW128G016064.1/OLAW128G076103.1/OLAW128G020546.1/OLAW128G073643.1/OMAW171G020623.1/OMAW171G078157.1/OMAW171G015908.1/OMAW171G075328.1/OALW18G074167.1/OALW18G016306.1/OALW18G076820.1/OMIW190G015994.1/OMIW190G078609.1/OMIW190G020835.1/OMIW190G075724.1/OAUW26G010833.1/OAUW26G039117.1/…	77
GO:0032040	small-subunit processome	119/190905	149/383722	3.02804e-14	6.11931e-13	2.49039e-13	OMEM6G04213.1/OMEM6G04214.1/OMEM6G08464.1/OGRW100G013509.1/OGRW100G018163.1/OLAW128G013607.1/OLAW128G018194.1/OMAW171G018198.1/OMAW171G013507.1/OALW18G018703.1/OALW18G013782.1/OMIW190G013616.1/OMIW190G018376.1/OAUW26G08285.1/OOFW323G08912.1/OPUW363G013944.1/OPUW363G018061.1/ORHW375G07853.1/OBRW59G07555.1/OEIW71G08129.1/OMEM6G04867.1/OGRW100G010089.1/OLAW128G010032.1/OGLW97G004804.1/OMEM6G011072.1…	119
GO:0090114	COPII-coated vesicle budding	71/190905	79/383722	3.51415e-14	7.02447e-13	2.85876e-13	OMEM6G031543.1/OGRW100G059938.1/OGRW100G064830.1/OGRW100G062604.1/OLAW128G062744.1/OLAW128G067357.1/OLAW128G059822.1/OLAW128G064862.1/OMAW171G063925.1/OMAW171G066333.1/OMAW171G060965.1/OALW18G060425.1/OALW18G067810.1/OALW18G063085.1/OMIW190G061256.1/OMIW190G069198.1/OMIW190G064278.1/OAUW26G032894.1/OAUW26G035113.1/OOFW323G032961.1/OOFW323G034950.1/OPUW363G063671.1/OPUW363G068630.1/OPUW363G060742.…	71
GO:0035267	NuA4 histone acetyltransFtrase complex	98/190905	118/383722	5.14163e-14	1.01672e-12	4.13775e-13	OMEM6G030848.1/OMEM6G032944.1/OGRW100G059227.1/OGRW100G063880.1/OGRW100G061950.1/OGRW100G066338.1/OLAW128G061655.1/OLAW128G066353.1/OLAW128G059168.1/OLAW128G063972.1/OMAW171G063146.1/OMAW171G065292.1/OMAW171G060201.1/OMAW171G067776.1/OALW18G059688.1/OALW18G066867.1/OALW18G062379.1/OALW18G064358.1/OMIW190G060496.1/OMIW190G068176.1/OMIW190G063475.1/OMIW190G065549.1/OAUW26G032136.1/OAUW26G034143.1/O…	98
GO:0019888	protein phosphatase regulator activity	219/190905	310/383722	6.40797e-14	1.25364e-12	5.10198e-13	OMEM6G011523.1/OMEM6G012809.1/OMEM6G01508.1/OMEM6G017459.1/OMEM6G022354.1/OMEM6G027180.1/OMEM6G029628.1/OMEM6G034457.1/OMEM6G039371.1/OGRW100G024577.1/OGRW100G025939.1/OGRW100G034747.1/OGRW100G039749.1/OGRW100G047120.1/OGRW100G052139.1/OGRW100G057980.1/OGRW100G028283.1/OGRW100G029557.1/OGRW100G031453.1/OGRW100G043049.1/OGRW100G055804.1/OGRW100G060866.1/OGRW100G067839.1/OGRW100G0705.1/OLAW128G0293…	219
GO:0097367	carbohydrate derivative binding	75/190905	85/383722	6.6671e-14	1.27717e-12	5.1977e-13	OMEM6G037364.1/OMEM6G039928.1/OGRW100G072883.1/OGRW100G077765.1/OGRW100G075424.1/OGRW100G080102.1/OLAW128G075748.1/OLAW128G080864.1/OLAW128G073373.1/OLAW128G078639.1/OMAW171G077815.1/OMAW171G080632.1/OMAW171G074980.1/OMAW171G083110.1/OALW18G073820.1/OALW18G079015.1/OALW18G076515.1/OALW18G081453.1/OMIW190G078272.1/OMIW190G083632.1/OMIW190G075345.1/OMIW190G080974.1/OAUW26G038833.1/OAUW26G041176.1/O…	75
GO:1901135	carbohydrate derivative metabolic process	75/190905	85/383722	6.6671e-14	1.27717e-12	5.1977e-13	OMEM6G037364.1/OMEM6G039928.1/OGRW100G072883.1/OGRW100G077765.1/OGRW100G075424.1/OGRW100G080102.1/OLAW128G075748.1/OLAW128G080864.1/OLAW128G073373.1/OLAW128G078639.1/OMAW171G077815.1/OMAW171G080632.1/OMAW171G074980.1/OMAW171G083110.1/OALW18G073820.1/OALW18G079015.1/OALW18G076515.1/OALW18G081453.1/OMIW190G078272.1/OMIW190G083632.1/OMIW190G075345.1/OMIW190G080974.1/OAUW26G038833.1/OAUW26G041176.1/O…	75
GO:0070122	isopeptidase activity	235/190905	337/383722	7.94047e-14	1.50542e-12	6.12662e-13	OMEM6G023261.1/OGRW100G037050.1/OGRW100G043935.1/OGRW100G040654.1/OGRW100G048288.1/OLAW128G041897.1/OLAW128G045470.1/OLAW128G038486.1/OLAW128G048951.1/OMAW171G042366.1/OMAW171G045727.1/OMAW171G038953.1/OMAW171G049193.1/OALW18G037240.1/OALW18G047438.1/OALW18G040796.1/OALW18G044209.1/OMIW190G042513.1/OMIW190G046055.1/OMIW190G039265.1/OMIW190G049554.1/OAUW26G020755.1/OAUW26G024339.1/OOFW323G020671.1…	235
GO:0006750	glutathione biosynthetic process	77/190905	88/383722	8.57058e-14	1.6083e-12	6.54531e-13	OMEM6G039361.1/OMEM6G041313.1/OGRW100G074912.1/OGRW100G079174.1/OGRW100G077214.1/OGRW100G081335.1/OLAW128G078025.1/OLAW128G082383.1/OLAW128G075208.1/OLAW128G079954.1/OMAW171G080040.1/OMAW171G082048.1/OMAW171G077143.1/OMAW171G084505.1/OALW18G075980.1/OALW18G080512.1/OALW18G078444.1/OALW18G082778.1/OMIW190G080464.1/OMIW190G085090.1/OMIW190G077614.1/OMIW190G082574.1/OAUW26G040661.1/OAUW26G042736.1/O…	77
GO:0019953	sexual reproduction	240/190905	346/383722	1.09848e-13	2.04051e-12	8.30431e-13	OMEM6G036654.1/OMEM6G041229.1/OMEM6G041230.1/OGRW100G021105.1/OGRW100G021107.1/OGRW100G021108.1/OGRW100G05639.1/OGRW100G05641.1/OGRW100G072298.1/OGRW100G069988.1/OLAW128G025737.1/OLAW128G025738.1/OLAW128G070487.1/OLAW128G020953.1/OLAW128G020955.1/OLAW128G020956.1/OLAW128G072801.1/OMAW171G026115.1/OMAW171G026117.1/OMAW171G026119.1/OMAW171G074404.1/OMAW171G021051.1/OMAW171G071982.1/OALW18G021434.1/…	240
GO:0045905	positive regulation of translational termination	74/190905	84/383722	1.18491e-13	2.17906e-12	8.86815e-13	OMEM6G012087.1/OMEM6G028650.1/OMEM6G041251.1/OGRW100G025231.1/OGRW100G051099.1/OGRW100G053590.1/OGRW100G079096.1/OGRW100G028873.1/OGRW100G054858.1/OGRW100G057067.1/OGRW100G081280.1/OLAW128G030029.1/OLAW128G051702.1/OLAW128G054337.1/OLAW128G082294.1/OLAW128G024884.1/OLAW128G055205.1/OLAW128G057328.1/OLAW128G079881.1/OMAW171G030216.1/OMAW171G055559.1/OMAW171G058055.1/OMAW171G081954.1/OMAW171G025203…	74
GO:0089701	U2AF	76/190905	87/383722	1.51068e-13	2.69723e-12	1.0977e-12	OMEM6G022454.1/OMEM6G034059.1/OMEM6G03803.1/OMEM6G03804.1/OGRW100G039850.1/OGRW100G065095.1/OGRW100G08959.1/OGRW100G03103.1/OGRW100G043131.1/OGRW100G067444.1/OLAW128G044603.1/OLAW128G067591.1/OLAW128G08853.1/OLAW128G02992.1/OLAW128G040927.1/OLAW128G065121.1/OMAW171G03182.1/OMAW171G044913.1/OMAW171G066607.1/OMAW171G041530.1/OMAW171G068971.1/OMAW171G08926.1/OALW18G039987.1/OALW18G068074.1/OALW18G09…	76
GO:0140021	mitochondrial ADP transmembrane transport	76/190905	87/383722	1.51068e-13	2.69723e-12	1.0977e-12	OMEM6G09906.1/OGRW100G015177.1/OGRW100G020019.1/OLAW128G015421.1/OLAW128G019936.1/OMAW171G019988.1/OMAW171G015236.1/OALW18G020410.1/OALW18G015651.1/OMIW190G015366.1/OMIW190G020197.1/OAUW26G010166.1/OOFW323G010675.1/OPUW363G015234.1/OPUW363G019831.1/ORHW375G09704.1/OBRW59G09074.1/OEIW71G09859.1/OGLW97G009694.1/OMEM6G020538.1/OGRW100G037932.1/OGRW100G041390.1/OLAW128G042617.1/OLAW128G039167.1/OMAW1…	76
GO:1990544	mitochondrial ATP transmembrane transport	76/190905	87/383722	1.51068e-13	2.69723e-12	1.0977e-12	OMEM6G09906.1/OGRW100G015177.1/OGRW100G020019.1/OLAW128G015421.1/OLAW128G019936.1/OMAW171G019988.1/OMAW171G015236.1/OALW18G020410.1/OALW18G015651.1/OMIW190G015366.1/OMIW190G020197.1/OAUW26G010166.1/OOFW323G010675.1/OPUW363G015234.1/OPUW363G019831.1/ORHW375G09704.1/OBRW59G09074.1/OEIW71G09859.1/OGLW97G009694.1/OMEM6G020538.1/OGRW100G037932.1/OGRW100G041390.1/OLAW128G042617.1/OLAW128G039167.1/OMAW1…	76
GO:0044249	cellular biosynthetic process	63/190905	69/383722	1.67354e-13	2.95927e-12	1.20434e-12	OMEM6G06597.1/OGRW100G011826.1/OGRW100G016328.1/OLAW128G011905.1/OLAW128G016663.1/OMAW171G016512.1/OMAW171G011863.1/OALW18G017034.1/OALW18G012245.1/OMIW190G011902.1/OMIW190G016715.1/OAUW26G06456.1/OOFW323G07202.1/OPUW363G011762.1/OPUW363G016434.1/ORHW375G06185.1/OBRW59G06099.1/OEIW71G06376.1/OGLW97G006474.1/OMEM6G037895.1/OGRW100G073448.1/OGRW100G075971.1/OLAW128G076362.1/OLAW128G073888.1/OMAW171…	63
GO:0016571	histone methylation	154/190905	206/383722	1.92437e-13	3.37039e-12	1.37165e-12	OMEM6G031067.1/OGRW100G059521.1/OMAW171G063451.1/OMAW171G060492.1/OALW18G059957.1/OALW18G062626.1/OMIW190G060776.1/OPUW363G063188.1/OBRW59G027870.1/OGLW97G0032836.1/OMEM6G037352.1/OGRW100G072865.1/OGRW100G077731.1/OGRW100G080090.1/OLAW128G075720.1/OLAW128G080840.1/OLAW128G078623.1/OMAW171G077799.1/OMAW171G080613.1/OMAW171G083090.1/OALW18G073797.1/OALW18G078992.1/OALW18G081441.1/OMIW190G078255.1/O…	154
GO:0033180	proton-transporting V-type ATPase, V1 domain	115/190905	145/383722	2.0141e-13	3.49427e-12	1.42207e-12	OMEM6G025040.1/OMEM6G025149.1/OMEM6G04100.1/OGRW100G045676.1/OGRW100G09274.1/OGRW100G03398.1/OGRW100G049873.1/OLAW128G047265.1/OLAW128G09184.1/OLAW128G03300.1/OLAW128G050538.1/OMAW171G03482.1/OMAW171G047501.1/OMAW171G050878.1/OMAW171G09341.1/OALW18G049170.1/OALW18G09458.1/OALW18G03460.1/OALW18G045780.1/OMIW190G03488.1/OMIW190G047847.1/OMIW190G051275.1/OMIW190G09426.1/OAUW26G026277.1/OAUW26G03792.…	115
GO:0004560	alpha-L-fucosidase activity	73/190905	83/383722	2.10266e-13	3.61383e-12	1.47073e-12	OMEM6G018041.1/OGRW100G035338.1/OGRW100G032023.1/OLAW128G033511.1/OLAW128G036909.1/OMAW171G037211.1/OMAW171G033446.1/OALW18G032360.1/OALW18G036012.1/OMIW190G037571.1/OMIW190G037572.1/OMIW190G034104.1/OAUW26G019038.1/OOFW323G018869.1/OPUW363G036852.1/OPUW363G033129.1/ORHW375G018853.1/OBRW59G016713.1/OEIW71G019098.1/OGLW97G0018766.1/OMEM6G023639.1/OGRW100G070937.1/OGRW100G068735.1/OLAW128G069224.1/…	73
GO:0042765	GPI-anchor transamidase complex	107/190905	133/383722	2.386e-13	4.06283e-12	1.65346e-12	OMEM6G07532.1/OLAW128G08950.1/OMEM6G05397.1/OMEM6G09677.1/OGRW100G010599.1/OGRW100G014963.1/OGRW100G019752.1/OLAW128G010555.1/OLAW128G015166.1/OLAW128G019746.1/OMAW171G019747.1/OMAW171G04808.1/OMAW171G014994.1/OALW18G010819.1/OALW18G020188.1/OALW18G015373.1/OMIW190G015125.1/OMIW190G04804.1/OMIW190G019950.1/OAUW26G09920.1/OOFW323G010427.1/OOFW323G05304.1/OPUW363G014989.1/OPUW363G019585.1/OPUW363G0…	107
GO:0046855	inositol phosphate dephosphorylation	128/190905	166/383722	4.22495e-13	7.12815e-12	2.90095e-12	OMEM6G028354.1/OGRW100G053305.1/OGRW100G053306.1/OGRW100G056767.1/OLAW128G054036.1/OLAW128G054037.1/OLAW128G057032.1/OLAW128G057033.1/OMAW171G057745.1/OMAW171G057746.1/OMAW171G054291.1/OMAW171G054292.1/OALW18G053640.1/OALW18G053641.1/OALW18G057145.1/OALW18G057146.1/OMIW190G054667.1/OMIW190G054668.1/OMIW190G057924.1/OMIW190G057925.1/OAUW26G029700.1/OOFW323G029454.1/OOFW323G029455.1/OPUW363G057504.…	128
GO:0045901	positive regulation of translational elongation	74/190905	85/383722	4.67102e-13	7.8091e-12	3.17808e-12	OMEM6G012087.1/OMEM6G028650.1/OMEM6G041251.1/OGRW100G025231.1/OGRW100G051099.1/OGRW100G053590.1/OGRW100G079096.1/OGRW100G028873.1/OGRW100G054858.1/OGRW100G057067.1/OGRW100G081280.1/OLAW128G030029.1/OLAW128G051702.1/OLAW128G054337.1/OLAW128G082294.1/OLAW128G024884.1/OLAW128G055205.1/OLAW128G057328.1/OLAW128G079881.1/OMAW171G030216.1/OMAW171G055559.1/OMAW171G058055.1/OMAW171G081954.1/OMAW171G025203…	74
GO:0005992	trehalose biosynthetic process	304/190905	458/383722	4.84612e-13	8.02884e-12	3.26751e-12	OMEM6G017995.1/OMEM6G09459.1/OGRW100G014746.1/OGRW100G035290.1/OGRW100G019530.1/OGRW100G031969.1/OLAW128G014937.1/OLAW128G033445.1/OLAW128G019500.1/OMAW171G019528.1/OMAW171G037152.1/OMAW171G014789.1/OMAW171G033381.1/OALW18G019976.1/OALW18G032308.1/OALW18G015153.1/OALW18G035947.1/OMIW190G014919.1/OMIW190G037520.1/OMIW190G019735.1/OMIW190G034159.1/OAUW26G018993.1/OAUW26G09681.1/OOFW323G010207.1/OOF…	304
GO:0016638	oxidoreductase activity, acting on the CH-NH2 group of donors	76/190905	88/383722	5.65031e-13	9.2776e-12	3.77572e-12	OMEM6G03904.1/OGRW100G09070.1/OGRW100G03187.1/OLAW128G08956.1/OLAW128G03078.1/OMAW171G03285.1/OMAW171G08825.1/OALW18G09262.1/OALW18G03237.1/OMIW190G03285.1/OMIW190G08822.1/OAUW26G03534.1/OOFW323G03777.1/OPUW363G09125.1/OPUW363G03398.1/ORHW375G03469.1/OBRW59G03517.1/OEIW71G03736.1/OGLW97G003799.1/OMEM6G022357.1/OGRW100G039752.1/OGRW100G043051.1/OLAW128G044510.1/OLAW128G040845.1/OMAW171G044836.1/OM…	76
GO:0030870	Mre11 complex	66/190905	74/383722	6.72559e-13	1.09455e-11	4.45449e-12	OMEM6G018657.1/OMEM6G029990.1/OGRW100G035990.1/OGRW100G054297.1/OLAW128G034190.1/OLAW128G061128.1/OLAW128G037516.1/OLAW128G058541.1/OMAW171G037860.1/OMAW171G062346.1/OMAW171G034075.1/OALW18G033031.1/OALW18G054630.1/OALW18G061712.1/OMIW190G038155.1/OMIW190G059647.1/OMIW190G033403.1/OAUW26G019691.1/OAUW26G031297.1/OOFW323G019521.1/OPUW363G037498.1/OPUW363G062065.1/OPUW363G033768.1/OPUW363G059161.1/…	66
GO:0080143	regulation of amino acid export	94/190905	115/383722	1.11361e-12	1.79642e-11	7.31094e-12	OMEM6G07020.1/OGRW100G012246.1/OGRW100G016746.1/OLAW128G012378.1/OLAW128G017054.1/OMAW171G016932.1/OMAW171G012304.1/OALW18G017402.1/OALW18G012678.1/OMIW190G012341.1/OMIW190G017197.1/OOFW323G07685.1/OPUW363G012209.1/OPUW363G016855.1/ORHW375G06644.1/OBRW59G06436.1/OEIW71G06822.1/OGLW97G006910.1/OMEM6G07161.1/OGRW100G012368.1/OGRW100G016860.1/OLAW128G012517.1/OLAW128G017166.1/OMAW171G017048.1/OMAW17…	94
GO:0003724	RNA helicase activity	114/190905	146/383722	1.77639e-12	2.84068e-11	1.15608e-11	OMEM6G027891.1/OGRW100G052860.1/OGRW100G056398.1/OLAW128G053555.1/OLAW128G056634.1/OMAW171G057245.1/OMAW171G053807.1/OALW18G053193.1/OALW18G056731.1/OMIW190G054203.1/OMIW190G057478.1/OAUW26G029213.1/OOFW323G028994.1/OPUW363G057018.1/OPUW363G053668.1/ORHW375G029157.1/OBRW59G025164.1/OEIW71G029315.1/OGLW97G0029493.1/OMEM6G06792.1/OGRW100G011986.1/OGRW100G016526.1/OLAW128G012093.1/OLAW128G016835.1/O…	114
GO:0006561	proline biosynthetic process	59/190905	65/383722	1.89571e-12	3.00535e-11	1.22309e-11	OMEM6G06017.1/OGRW100G011242.1/OGRW100G05214.1/OLAW128G011206.1/OLAW128G05144.1/OMAW171G05451.1/OMAW171G011305.1/OALW18G011459.1/OALW18G05337.1/OMIW190G05459.1/OMIW190G011439.1/OAUW26G05819.1/OOFW323G05934.1/OPUW363G011442.1/OPUW363G05556.1/ORHW375G05660.1/OBRW59G022506.1/OBRW59G05398.1/OEIW71G05877.1/OGLW97G005913.1/OMEM6G021523.1/OGRW100G038939.1/OGRW100G042298.1/OLAW128G043664.1/OLAW128G040069…	59
GO:1990316	Atg1/ULK1 kinase complex	56/190905	61/383722	2.17832e-12	3.42387e-11	1.39342e-11	OMEM6G09350.1/OGRW100G014629.1/OGRW100G019423.1/OLAW128G014831.1/OLAW128G019391.1/OMAW171G019415.1/OMAW171G014682.1/OALW18G019853.1/OALW18G015055.1/OMIW190G014795.1/OMIW190G019621.1/OAUW26G09539.1/OOFW323G010094.1/OPUW363G014221.1/OPUW363G019261.1/ORHW375G09129.1/OBRW59G08563.1/OEIW71G09307.1/OGLW97G009077.1/OMEM6G017882.1/OGRW100G035175.1/OGRW100G031869.1/OLAW128G033338.1/OLAW128G036747.1/OMAW17…	56
GO:0006325	chromatin organization	115/190905	148/383722	2.56719e-12	3.96727e-11	1.61457e-11	OMEM6G035445.1/OGRW100G071043.1/OGRW100G068666.1/OLAW128G069165.1/OLAW128G071524.1/OMAW171G070467.1/OALW18G069700.1/OMIW190G070858.1/OAUW26G036773.1/OOFW323G036708.1/OPUW363G070338.1/ORHW375G037044.1/OBRW59G031783.1/OEIW71G037205.1/OMEM6G036984.1/OGRW100G074495.1/OGRW100G029748.1/OLAW128G077456.1/OLAW128G034710.1/OMAW171G034633.1/OMAW171G076576.1/OALW18G075517.1/OALW18G033596.1/OMIW190G035109.1/O…	115
GO:0007062	sister chromatid cohesion	115/190905	148/383722	2.56719e-12	3.96727e-11	1.61457e-11	OMEM6G017574.1/OGRW100G034845.1/OGRW100G031566.1/OLAW128G032995.1/OLAW128G036443.1/OMAW171G036724.1/OMAW171G032982.1/OALW18G031841.1/OALW18G035520.1/OMIW190G034580.1/OAUW26G018557.1/OOFW323G018392.1/OPUW363G032657.1/ORHW375G018352.1/OBRW59G016295.1/OEIW71G018609.1/OGLW97G0018251.1/OGLW97G0021622.1/OMEM6G022629.1/OGRW100G039995.1/OGRW100G043257.1/OGRW100G043278.1/OLAW128G044754.1/OLAW128G041060.1/…	115
GO:0004826	phenylalanine-tRNA ligase activity	61/190905	68/383722	2.80586e-12	4.26444e-11	1.73551e-11	OMEM6G019525.1/OGRW100G015521.1/OGRW100G020393.1/OLAW128G015787.1/OLAW128G020286.1/OMAW171G016701.1/OMAW171G073438.1/OMAW171G015626.1/OALW18G020834.1/OALW18G016030.1/OMIW190G012091.1/OMIW190G073770.1/OMIW190G020569.1/OAUW26G010573.1/OOFW323G010993.1/OPUW363G011951.1/OPUW363G073261.1/OPUW363G020237.1/ORHW375G010078.1/OBRW59G09389.1/OEIW71G010232.1/OGLW97G0038031.1/OMEM6G022400.1/OMEM6G035549.1/OGR…	61
GO:0006432	phenylalanyl-tRNA aminoacylation	61/190905	68/383722	2.80586e-12	4.26444e-11	1.73551e-11	OMEM6G019525.1/OGRW100G015521.1/OGRW100G020393.1/OLAW128G015787.1/OLAW128G020286.1/OMAW171G016701.1/OMAW171G073438.1/OMAW171G015626.1/OALW18G020834.1/OALW18G016030.1/OMIW190G012091.1/OMIW190G073770.1/OMIW190G020569.1/OAUW26G010573.1/OOFW323G010993.1/OPUW363G011951.1/OPUW363G073261.1/OPUW363G020237.1/ORHW375G010078.1/OBRW59G09389.1/OEIW71G010232.1/OGLW97G0038031.1/OMEM6G022400.1/OMEM6G035549.1/OGR…	61
GO:0003849	3-deoxy-7-phosphoheptulonate synthase activity	77/190905	91/383722	3.79496e-12	5.72044e-11	2.32806e-11	OMEM6G015197.1/OMEM6G031638.1/OGRW100G023342.1/OGRW100G060006.1/OGRW100G027220.1/OGRW100G062680.1/OLAW128G028109.1/OLAW128G062819.1/OLAW128G023176.1/OLAW128G059899.1/OMAW171G028427.1/OMAW171G064010.1/OMAW171G061038.1/OALW18G023758.1/OALW18G060492.1/OALW18G027826.1/OALW18G063162.1/OMIW190G023508.1/OMIW190G061358.1/OMIW190G028537.1/OMIW190G064345.1/OAUW26G013576.1/OAUW26G032986.1/OOFW323G013964.1/O…	77
GO:0046577	long-chain-alcohol oxidase activity	49/190905	52/383722	4.12899e-12	6.17335e-11	2.51238e-11	OMEM6G036101.1/OMEM6G036102.1/OMEM6G036108.1/OGRW100G071643.1/OGRW100G069463.1/OLAW128G070046.1/OMAW171G073845.1/OMAW171G073849.1/OMAW171G073850.1/OMAW171G071388.1/OMAW171G071394.1/OMAW171G071396.1/OALW18G070385.1/OALW18G072670.1/OALW18G072671.1/OMIW190G074190.1/OMIW190G071765.1/OMIW190G071769.1/OMIW190G071770.1/OAUW26G037693.1/OOFW323G037609.1/OPUW363G073688.1/OPUW363G071171.1/ORHW375G037969.1/O…	49
GO:0005049	nuclear export signal receptor activity	74/190905	87/383722	5.83415e-12	8.6159e-11	3.50643e-11	OMEM6G012910.1/OGRW100G026037.1/OGRW100G052233.1/OGRW100G029646.1/OGRW100G055972.1/OLAW128G030860.1/OLAW128G053043.1/OLAW128G025652.1/OLAW128G056178.1/OMAW171G030960.1/OMAW171G056807.1/OMAW171G026023.1/OMAW171G053378.1/OALW18G026559.1/OALW18G052638.1/OALW18G030345.1/OALW18G056336.1/OMIW190G026134.1/OMIW190G053841.1/OMIW190G031254.1/OMIW190G057054.1/OAUW26G016403.1/OAUW26G028728.1/OOFW323G028572.1…	74
GO:0000077	DNA damage checkpoint	57/190905	63/383722	6.32489e-12	8.6159e-11	3.50643e-11	OMEM6G014905.1/OGRW100G023036.1/OGRW100G026933.1/OLAW128G027770.1/OLAW128G022905.1/OMAW171G028123.1/OMAW171G023032.1/OALW18G023423.1/OALW18G027519.1/OMIW190G023215.1/OMIW190G028198.1/OAUW26G013278.1/OOFW323G013664.1/OPUW363G022907.1/OPUW363G027785.1/ORHW375G012879.1/OBRW59G011959.1/OEIW71G012985.1/OGLW97G0012844.1/OMEM6G017809.1/OGRW100G035096.1/OGRW100G031789.1/OLAW128G033261.1/OLAW128G036681.1/…	57
GO:0004343	glucosamine 6-phosphate N-acetyltransFtrase activity	57/190905	63/383722	6.32489e-12	8.6159e-11	3.50643e-11	OMEM6G09899.1/OGRW100G015170.1/OGRW100G020012.1/OLAW128G015414.1/OLAW128G019929.1/OMAW171G019979.1/OMAW171G015228.1/OALW18G020402.1/OALW18G015643.1/OMIW190G015355.1/OMIW190G020189.1/OAUW26G010156.1/OOFW323G010668.1/OPUW363G015224.1/OPUW363G019819.1/ORHW375G09697.1/OBRW59G09067.1/OEIW71G09851.1/OGLW97G009686.1/OMEM6G022006.1/OGRW100G039434.1/OGRW100G042757.1/OLAW128G044180.1/OLAW128G040533.1/OMAW1…	57
GO:0004751	ribose-5-phosphate isomerase activity	57/190905	63/383722	6.32489e-12	8.6159e-11	3.50643e-11	OMEM6G012288.1/OGRW100G025398.1/OGRW100G029029.1/OLAW128G030216.1/OLAW128G025049.1/OMAW171G030388.1/OMAW171G025371.1/OALW18G025900.1/OALW18G029691.1/OMIW190G025491.1/OMIW190G030625.1/OAUW26G015769.1/OOFW323G015939.1/OPUW363G025148.1/OPUW363G030039.1/ORHW375G015431.1/OBRW59G013913.1/OEIW71G015760.1/OGLW97G0015417.1/OMEM6G016459.1/OGRW100G033649.1/OGRW100G030435.1/OLAW128G031733.1/OLAW128G035317.1/…	57
GO:0004791	thioredoxin-disulfide reductase activity	57/190905	63/383722	6.32489e-12	8.6159e-11	3.50643e-11	OMEM6G09863.1/OGRW100G015141.1/OGRW100G019965.1/OLAW128G015372.1/OLAW128G019556.1/OMAW171G019946.1/OMAW171G015197.1/OALW18G020365.1/OALW18G015594.1/OMIW190G015321.1/OMIW190G020153.1/OAUW26G010116.1/OOFW323G010628.1/OPUW363G015183.1/OPUW363G019782.1/ORHW375G09654.1/OBRW59G09036.1/OEIW71G09814.1/OGLW97G009647.1/OMEM6G024314.1/OGRW100G044915.1/OGRW100G049228.1/OLAW128G046542.1/OLAW128G049896.1/OMAW1…	57
GO:0006048	UDP-N-acetylglucosamine biosynthetic process	57/190905	63/383722	6.32489e-12	8.6159e-11	3.50643e-11	OMEM6G09899.1/OGRW100G015170.1/OGRW100G020012.1/OLAW128G015414.1/OLAW128G019929.1/OMAW171G019979.1/OMAW171G015228.1/OALW18G020402.1/OALW18G015643.1/OMIW190G015355.1/OMIW190G020189.1/OAUW26G010156.1/OOFW323G010668.1/OPUW363G015224.1/OPUW363G019819.1/ORHW375G09697.1/OBRW59G09067.1/OEIW71G09851.1/OGLW97G009686.1/OMEM6G022006.1/OGRW100G039434.1/OGRW100G042757.1/OLAW128G044180.1/OLAW128G040533.1/OMAW1…	57
GO:0009052	pentose-phosphate shunt, non-oxidative branch	57/190905	63/383722	6.32489e-12	8.6159e-11	3.50643e-11	OMEM6G012288.1/OGRW100G025398.1/OGRW100G029029.1/OLAW128G030216.1/OLAW128G025049.1/OMAW171G030388.1/OMAW171G025371.1/OALW18G025900.1/OALW18G029691.1/OMIW190G025491.1/OMIW190G030625.1/OAUW26G015769.1/OOFW323G015939.1/OPUW363G025148.1/OPUW363G030039.1/ORHW375G015431.1/OBRW59G013913.1/OEIW71G015760.1/OGLW97G0015417.1/OMEM6G016459.1/OGRW100G033649.1/OGRW100G030435.1/OLAW128G031733.1/OLAW128G035317.1/…	57
GO:0009247	glycolipid biosynthetic process	57/190905	63/383722	6.32489e-12	8.6159e-11	3.50643e-11	OMEM6G033537.1/OGRW100G064560.1/OGRW100G066925.1/OLAW128G067072.1/OLAW128G064583.1/OMAW171G066053.1/OMAW171G068448.1/OALW18G067526.1/OALW18G064958.1/OMIW190G068912.1/OMIW190G066221.1/OAUW26G034813.1/OOFW323G034654.1/OPUW363G068363.1/OPUW363G065708.1/ORHW375G035009.1/OBRW59G030013.1/OEIW71G035302.1/OGLW97G0035535.1/OMEM6G010559.1/OGRW100G015844.1/OGRW100G020743.1/OLAW128G016153.1/OLAW128G020624.1/…	57
GO:0019430	removal of superoxide radicals	57/190905	63/383722	6.32489e-12	8.6159e-11	3.50643e-11	OMEM6G09863.1/OGRW100G015141.1/OGRW100G019965.1/OLAW128G015372.1/OLAW128G019556.1/OMAW171G019946.1/OMAW171G015197.1/OALW18G020365.1/OALW18G015594.1/OMIW190G015321.1/OMIW190G020153.1/OAUW26G010116.1/OOFW323G010628.1/OPUW363G015183.1/OPUW363G019782.1/ORHW375G09654.1/OBRW59G09036.1/OEIW71G09814.1/OGLW97G009647.1/OMEM6G024314.1/OGRW100G044915.1/OGRW100G049228.1/OLAW128G046542.1/OLAW128G049896.1/OMAW1…	57
GO:0043043	peptide biosynthetic process	57/190905	63/383722	6.32489e-12	8.6159e-11	3.50643e-11	OMEM6G037242.1/OMEM6G039794.1/OGRW100G072750.1/OGRW100G077623.1/OGRW100G075330.1/OGRW100G079994.1/OLAW128G075622.1/OLAW128G080736.1/OLAW128G073279.1/OLAW128G078519.1/OMAW171G077687.1/OMAW171G080499.1/OMAW171G074846.1/OMAW171G082973.1/OALW18G073670.1/OALW18G078876.1/OALW18G076410.1/OALW18G081352.1/OMIW190G078144.1/OMIW190G083500.1/OMIW190G075216.1/OMIW190G080833.1/OAUW26G038730.1/OAUW26G041071.1/O…	57
GO:0043044	ATP-dependent chromatin remodeling	57/190905	63/383722	6.32489e-12	8.6159e-11	3.50643e-11	OMEM6G01405.1/OGRW100G07674.1/OGRW100G01924.1/OLAW128G07536.1/OLAW128G01793.1/OMAW171G01948.1/OMAW171G07832.1/OALW18G07874.1/OALW18G01950.1/OMIW190G01940.1/OMIW190G07825.1/OAUW26G02147.1/OOFW323G02450.1/OPUW363G07787.1/OPUW363G02051.1/ORHW375G02137.1/OBRW59G02266.1/OEIW71G02380.1/OGLW97G002268.1/OMEM6G06465.1/OGRW100G011680.1/OGRW100G016205.1/OLAW128G011761.1/OLAW128G016548.1/OMAW171G016381.1/OMA…	57
GO:0046695	SLIK (SAGA-like) complex	57/190905	63/383722	6.32489e-12	8.6159e-11	3.50643e-11	OMEM6G02693.1/OGRW100G07944.1/OGRW100G02144.1/OLAW128G07802.1/OLAW128G02028.1/OMAW171G02186.1/OMAW171G08048.1/OALW18G08142.1/OALW18G02162.1/OMIW190G02163.1/OMIW190G08025.1/OAUW26G02411.1/OOFW323G02673.1/OPUW363G08022.1/OPUW363G02286.1/ORHW375G02379.1/OBRW59G02522.1/OEIW71G02648.1/OGLW97G002622.1/OMEM6G05172.1/OGRW100G010398.1/OGRW100G04430.1/OLAW128G010360.1/OLAW128G04357.1/OMAW171G04610.1/OMAW17…	57
GO:0016868	intramolecular transFtrase activity, phosphotransFtrases	120/190905	157/383722	6.49988e-12	8.78895e-11	3.57685e-11	OMEM6G016252.1/OMEM6G032540.1/OMEM6G032549.1/OMEM6G035303.1/OMEM6G040768.1/OMEM6G040769.1/OGRW100G070501.1/OGRW100G068572.1/OLAW128G068770.1/OLAW128G071396.1/OMAW171G072816.1/OMAW171G070335.1/OALW18G069106.1/OALW18G071760.1/OMIW190G073160.1/OMIW190G070709.1/OAUW26G036457.1/OOFW323G036540.1/OPUW363G072662.1/OPUW363G070135.1/ORHW375G036876.1/OBRW59G031580.1/OEIW71G037121.1/OGLW97G0037418.1/OMEM6G02…	120
GO:0006631	fatty acid metabolic process	229/190905	336/383722	6.5475e-12	8.78895e-11	3.57685e-11	OMEM6G05497.1/OGRW100G010689.1/OGRW100G072907.1/OGRW100G04708.1/OLAW128G010645.1/OLAW128G075788.1/OLAW128G04630.1/OMAW171G04896.1/OMAW171G080658.1/OMAW171G075004.1/OALW18G010906.1/OALW18G073849.1/OALW18G04800.1/OMIW190G04895.1/OMIW190G083658.1/OMIW190G075368.1/OAUW26G05245.1/OOFW323G038860.1/OOFW323G05381.1/OPUW363G010684.1/OPUW363G010687.1/OPUW363G080505.1/OPUW363G05008.1/OPUW363G077565.1/ORHW37…	229
GO:0031083	BLOC-1 complex	69/190905	80/383722	7.6208e-12	1.01555e-10	4.13302e-11	OMEM6G037214.1/OMEM6G039771.1/OGRW100G077593.1/OGRW100G078639.1/OGRW100G079962.1/OLAW128G075593.1/OLAW128G080696.1/OLAW128G081877.1/OLAW128G078511.1/OMAW171G077666.1/OMAW171G080473.1/OMAW171G074810.1/OMAW171G082939.1/OALW18G073635.1/OALW18G078850.1/OALW18G079942.1/OALW18G081313.1/OMIW190G078119.1/OMIW190G083475.1/OMIW190G075181.1/OMIW190G080800.1/OMIW190G081923.1/OAUW26G038701.1/OAUW26G041035.1/O…	69
GO:0008380	RNA splicing	138/190905	186/383722	8.65736e-12	1.14539e-10	4.6614e-11	OMEM6G011663.1/OGRW100G024722.1/OGRW100G037302.1/OGRW100G044648.1/OGRW100G02367.1/OGRW100G02614.1/OGRW100G027667.1/OGRW100G028424.1/OGRW100G042245.1/OLAW128G010255.1/OLAW128G013427.1/OLAW128G029469.1/OLAW128G052482.1/OLAW128G08318.1/OLAW128G018937.1/OLAW128G024434.1/OLAW128G055238.1/OLAW128G058492.1/OLAW128G075188.1/OLAW128G079967.1/OMAW171G029725.1/OMAW171G024672.1/OALW18G025196.1/OALW18G01529.1…	138
GO:0003997	acyl-CoA oxidase activity	59/190905	66/383722	9.14594e-12	1.20138e-10	4.8893e-11	OMEM6G022786.1/OGRW100G043422.1/OGRW100G05717.1/OGRW100G047790.1/OLAW128G044953.1/OLAW128G021042.1/OLAW128G048490.1/OMAW171G045226.1/OMAW171G048671.1/OALW18G046921.1/OALW18G05814.1/OALW18G043708.1/OMIW190G045571.1/OMIW190G049007.1/OAUW26G023849.1/OOFW323G023644.1/OPUW363G048405.1/OPUW363G044959.1/ORHW375G023716.1/OBRW59G020756.1/OEIW71G023819.1/OGLW97G0023595.1/OMEM6G024709.1/OGRW100G045246.1/OGR…	59
GO:0004020	adenylylsulfate kinase activity	56/190905	62/383722	1.15259e-11	1.4618e-10	5.94913e-11	OMEM6G013783.1/OGRW100G021935.1/OGRW100G053433.1/OGRW100G06456.1/OGRW100G056895.1/OLAW128G026604.1/OLAW128G054167.1/OLAW128G021791.1/OLAW128G057158.1/OMAW171G026968.1/OMAW171G057870.1/OMAW171G054424.1/OALW18G022269.1/OALW18G053773.1/OALW18G06609.1/OALW18G057272.1/OMIW190G022080.1/OMIW190G054794.1/OMIW190G027068.1/OMIW190G058049.1/OAUW26G012081.1/OAUW26G029862.1/OOFW323G012559.1/OOFW323G029585.1/O…	56
GO:0006826	iron ion transport	56/190905	62/383722	1.15259e-11	1.4618e-10	5.94913e-11	OMEM6G037150.1/OMEM6G039731.1/OGRW100G072671.1/OGRW100G077543.1/OGRW100G075253.1/OGRW100G079912.1/OLAW128G075543.1/OLAW128G080643.1/OLAW128G073203.1/OLAW128G078443.1/OMAW171G077614.1/OMAW171G080412.1/OMAW171G074761.1/OMAW171G082872.1/OALW18G073591.1/OALW18G078794.1/OALW18G076329.1/OALW18G081269.1/OMIW190G078073.1/OMIW190G083412.1/OMIW190G075128.1/OMIW190G080751.1/OAUW26G038648.1/OAUW26G040984.1/O…	56
GO:0006879	cellular iron ion homeostasis	56/190905	62/383722	1.15259e-11	1.4618e-10	5.94913e-11	OMEM6G037150.1/OMEM6G039731.1/OGRW100G072671.1/OGRW100G077543.1/OGRW100G075253.1/OGRW100G079912.1/OLAW128G075543.1/OLAW128G080643.1/OLAW128G073203.1/OLAW128G078443.1/OMAW171G077614.1/OMAW171G080412.1/OMAW171G074761.1/OMAW171G082872.1/OALW18G073591.1/OALW18G078794.1/OALW18G076329.1/OALW18G081269.1/OMIW190G078073.1/OMIW190G083412.1/OMIW190G075128.1/OMIW190G080751.1/OAUW26G038648.1/OAUW26G040984.1/O…	56
GO:0008515	sucrose transmembrane transporter activity	56/190905	62/383722	1.15259e-11	1.4618e-10	5.94913e-11	OMEM6G013546.1/OGRW100G021688.1/OGRW100G06221.1/OLAW128G026346.1/OLAW128G021537.1/OMAW171G026693.1/OMAW171G021646.1/OALW18G022027.1/OALW18G06358.1/OMIW190G021820.1/OMIW190G073786.1/OMIW190G026815.1/OAUW26G011807.1/OOFW323G012327.1/OPUW363G021494.1/OPUW363G026459.1/ORHW375G011493.1/OBRW59G010699.1/OEIW71G011611.1/OGLW97G0011362.1/OGRW100G014120.1/OGRW100G018911.1/OLAW128G014271.1/OLAW128G018880.1/…	56
GO:0015770	sucrose transport	56/190905	62/383722	1.15259e-11	1.4618e-10	5.94913e-11	OMEM6G013546.1/OGRW100G021688.1/OGRW100G06221.1/OLAW128G026346.1/OLAW128G021537.1/OMAW171G026693.1/OMAW171G021646.1/OALW18G022027.1/OALW18G06358.1/OMIW190G021820.1/OMIW190G073786.1/OMIW190G026815.1/OAUW26G011807.1/OOFW323G012327.1/OPUW363G021494.1/OPUW363G026459.1/ORHW375G011493.1/OBRW59G010699.1/OEIW71G011611.1/OGLW97G0011362.1/OGRW100G014120.1/OGRW100G018911.1/OLAW128G014271.1/OLAW128G018880.1/…	56
GO:0008553	hydrogen-exporting ATPase activity, phosphorylative mechanism	155/190905	214/383722	1.195e-11	1.49497e-10	6.08409e-11	OMEM6G011576.1/OMEM6G026745.1/OGRW100G024629.1/OGRW100G051681.1/OGRW100G079821.1/OGRW100G028317.1/OGRW100G055363.1/OGRW100G081931.1/OLAW128G029367.1/OLAW128G052346.1/OLAW128G083107.1/OLAW128G024328.1/OLAW128G055728.1/OLAW128G080546.1/OMAW171G029631.1/OMAW171G056172.1/OMAW171G082786.1/OMAW171G024579.1/OMAW171G052781.1/OMAW171G085228.1/OALW18G025093.1/OALW18G052087.1/OALW18G081177.1/OALW18G028944.1…	155
GO:0120029	hydrogen ion export across plasma membrane	155/190905	214/383722	1.195e-11	1.49497e-10	6.08409e-11	OMEM6G011576.1/OMEM6G026745.1/OGRW100G024629.1/OGRW100G051681.1/OGRW100G079821.1/OGRW100G028317.1/OGRW100G055363.1/OGRW100G081931.1/OLAW128G029367.1/OLAW128G052346.1/OLAW128G083107.1/OLAW128G024328.1/OLAW128G055728.1/OLAW128G080546.1/OMAW171G029631.1/OMAW171G056172.1/OMAW171G082786.1/OMAW171G024579.1/OMAW171G052781.1/OMAW171G085228.1/OALW18G025093.1/OALW18G052087.1/OALW18G081177.1/OALW18G028944.1…	155
GO:0005643	nuclear pore	261/190905	392/383722	1.22408e-11	1.521e-10	6.19006e-11	OMEM6G013104.1/OMEM6G02609.1/OMEM6G013943.1/OGRW100G022107.1/OGRW100G044686.1/OGRW100G049122.1/OLAW128G026785.1/OLAW128G046428.1/OLAW128G049792.1/OMAW171G046641.1/OMAW171G022049.1/OMAW171G050095.1/OALW18G048353.1/OALW18G045044.1/OMIW190G046960.1/OMIW190G027235.1/OMIW190G050480.1/OAUW26G025316.1/OOFW323G012716.1/OOFW323G025138.1/OPUW363G049824.1/OPUW363G026844.1/OPUW363G046366.1/ORHW375G011906.1/O…	261
GO:0005247	voltage-gated chloride channel activity	153/190905	211/383722	1.39711e-11	1.72435e-10	7.01762e-11	OMEM6G04053.1/OGRW100G09235.1/OGRW100G03351.1/OLAW128G09139.1/OLAW128G03247.1/OMAW171G03440.1/OMAW171G03441.1/OMAW171G09304.1/OALW18G09419.1/OALW18G03414.1/OMIW190G09383.1/OAUW26G03736.1/OOFW323G03942.1/OPUW363G09285.1/OPUW363G03579.1/ORHW375G03630.1/OBRW59G03666.1/OEIW71G03916.1/OGLW97G003979.1/OMEM6G09924.1/OGRW100G015191.1/OGRW100G020036.1/OLAW128G015437.1/OLAW128G019952.1/OMAW171G020008.1/OMA…	153
GO:0004707	MAP kinase activity	225/190905	331/383722	1.4778e-11	1.81178e-10	7.37345e-11	OMEM6G026068.1/OMEM6G06766.1/OGRW100G011971.1/OGRW100G016514.1/OGRW100G026401.1/OGRW100G050744.1/OLAW128G012077.1/OLAW128G048179.1/OLAW128G016819.1/OLAW128G051342.1/OMAW171G016668.1/OMAW171G048377.1/OMAW171G012039.1/OMAW171G051789.1/OALW18G017179.1/OALW18G012412.1/OALW18G026951.1/OALW18G046635.1/OMIW190G012054.1/OMIW190G048723.1/OMIW190G016901.1/OMIW190G052182.1/OAUW26G027179.1/OAUW26G06606.1/OOF…	225
GO:0006890	retrograde vesicle-mediated transport, Golgi to ER	242/190905	360/383722	1.5293e-11	1.86251e-10	7.57987e-11	OMEM6G020610.1/OMEM6G020612.1/OGRW100G038015.1/OGRW100G038017.1/OGRW100G059380.1/OGRW100G059381.1/OGRW100G041439.1/OGRW100G062034.1/OLAW128G042713.1/OLAW128G062102.1/OLAW128G039232.1/OLAW128G059253.1/OLAW128G059254.1/OMAW171G043138.1/OMAW171G063271.1/OMAW171G039885.1/OMAW171G060331.1/OMAW171G060332.1/OALW18G038093.1/OALW18G038098.1/OALW18G059831.1/OALW18G041582.1/OMIW190G043444.1/OMIW190G060612.1…	242
GO:0000159	protein phosphatase type 2A complex	200/190905	289/383722	1.59718e-11	1.92928e-10	7.85163e-11	OMEM6G011523.1/OMEM6G012809.1/OMEM6G01508.1/OMEM6G017459.1/OMEM6G022354.1/OMEM6G027180.1/OMEM6G029628.1/OMEM6G034457.1/OMEM6G039371.1/OGRW100G024577.1/OGRW100G025939.1/OGRW100G034747.1/OGRW100G039749.1/OGRW100G047120.1/OGRW100G052139.1/OGRW100G057980.1/OGRW100G028283.1/OGRW100G029557.1/OGRW100G031453.1/OGRW100G043049.1/OGRW100G055804.1/OGRW100G060866.1/OGRW100G067839.1/OGRW100G0705.1/OLAW128G0293…	200
GO:0016307	phosphatidylinositol phosphate kinase activity	229/190905	338/383722	1.62577e-11	1.92928e-10	7.85163e-11	OMEM6G037437.1/OMEM6G040009.1/OGRW100G072980.1/OGRW100G077872.1/OGRW100G075503.1/OGRW100G080200.1/OLAW128G075838.1/OLAW128G080981.1/OLAW128G073448.1/OLAW128G078721.1/OMAW171G077918.1/OMAW171G080707.1/OMAW171G075065.1/OMAW171G083211.1/OALW18G073919.1/OALW18G079127.1/OALW18G076593.1/OALW18G081552.1/OMIW190G078372.1/OMIW190G083712.1/OMIW190G075433.1/OMIW190G081081.1/OAUW26G020398.1/OAUW26G038907.1/O…	229
GO:0046488	phosphatidylinositol metabolic process	229/190905	338/383722	1.62577e-11	1.92928e-10	7.85163e-11	OMEM6G037437.1/OMEM6G040009.1/OGRW100G072980.1/OGRW100G077872.1/OGRW100G075503.1/OGRW100G080200.1/OLAW128G075838.1/OLAW128G080981.1/OLAW128G073448.1/OLAW128G078721.1/OMAW171G077918.1/OMAW171G080707.1/OMAW171G075065.1/OMAW171G083211.1/OALW18G073919.1/OALW18G079127.1/OALW18G076593.1/OALW18G081552.1/OMIW190G078372.1/OMIW190G083712.1/OMIW190G075433.1/OMIW190G081081.1/OAUW26G020398.1/OAUW26G038907.1/O…	229
GO:0004820	glycine-tRNA ligase activity	58/190905	65/383722	1.64707e-11	1.92928e-10	7.85163e-11	OMEM6G016813.1/OMEM6G032038.1/OGRW100G034045.1/OGRW100G060419.1/OGRW100G030793.1/OGRW100G063051.1/OLAW128G032171.1/OLAW128G063263.1/OLAW128G035638.1/OLAW128G060245.1/OMAW171G035911.1/OMAW171G064464.1/OMAW171G032158.1/OMAW171G061460.1/OALW18G030992.1/OALW18G060923.1/OALW18G034706.1/OALW18G063549.1/OMIW190G036274.1/OMIW190G061802.1/OMIW190G032525.1/OMIW190G064772.1/OAUW26G017726.1/OAUW26G033363.1/O…	58
GO:0006426	glycyl-tRNA aminoacylation	58/190905	65/383722	1.64707e-11	1.92928e-10	7.85163e-11	OMEM6G016813.1/OMEM6G032038.1/OGRW100G034045.1/OGRW100G060419.1/OGRW100G030793.1/OGRW100G063051.1/OLAW128G032171.1/OLAW128G063263.1/OLAW128G035638.1/OLAW128G060245.1/OMAW171G035911.1/OMAW171G064464.1/OMAW171G032158.1/OMAW171G061460.1/OALW18G030992.1/OALW18G060923.1/OALW18G034706.1/OALW18G063549.1/OMIW190G036274.1/OMIW190G061802.1/OMIW190G032525.1/OMIW190G064772.1/OAUW26G017726.1/OAUW26G033363.1/O…	58
GO:0016851	magnesium chelatase activity	58/190905	65/383722	1.64707e-11	1.92928e-10	7.85163e-11	ORHW375G05840.1/OEIW71G06052.1/OMEM6G029090.1/OGRW100G054017.1/OGRW100G057475.1/OLAW128G054779.1/OLAW128G057735.1/OMAW171G027974.1/OMAW171G055083.1/OALW18G054358.1/OALW18G057869.1/OMIW190G023057.1/OMIW190G058718.1/OAUW26G030473.1/OOFW323G030326.1/OPUW363G022754.1/OPUW363G054870.1/ORHW375G030372.1/OBRW59G026211.1/OEIW71G030534.1/OGLW97G0012653.1/OMEM6G010986.1/OGRW100G023877.1/OGRW100G027647.1/OLA…	58
GO:0009082	branched-chain amino acid biosynthetic process	121/190905	160/383722	1.8664e-11	2.17234e-10	8.84083e-11	OMEM6G016768.1/OMEM6G08685.1/OGRW100G013692.1/OGRW100G033971.1/OGRW100G033974.1/OGRW100G018453.1/OGRW100G030740.1/OLAW128G013821.1/OLAW128G032096.1/OLAW128G032101.1/OLAW128G018420.1/OLAW128G035586.1/OMAW171G035808.1/OMAW171G035824.1/OMAW171G013725.1/OMAW171G013727.1/OMAW171G032106.1/OALW18G018892.1/OALW18G030917.1/OALW18G030920.1/OALW18G014078.1/OMIW190G036204.1/OMIW190G036224.1/OMIW190G018584.1/…	121
GO:0043039	tRNA aminoacylation	174/190905	246/383722	1.88506e-11	2.18027e-10	8.87308e-11	OMEM6G02055.1/OMEM6G035610.1/OGRW100G046388.1/OGRW100G070790.1/OGRW100G01413.1/OGRW100G068868.1/OLAW128G069366.1/OLAW128G06951.1/OLAW128G01288.1/OLAW128G071687.1/OMAW171G01351.1/OMAW171G070706.1/OMAW171G07273.1/OALW18G049907.1/OALW18G069423.1/OALW18G01426.1/OALW18G072072.1/OMIW190G01325.1/OMIW190G073565.1/OMIW190G071071.1/OMIW190G07243.1/OAUW26G01467.1/OAUW26G036982.1/OOFW323G01876.1/OOFW323G0369…	174
GO:0004518	nuclease activity	303/190905	466/383722	2.08402e-11	2.36583e-10	9.62825e-11	OMEM6G019621.1/OMEM6G027804.1/OGRW100G059426.1/OMAW171G058004.1/OMAW171G068048.1/OALW18G050647.1/OMIW190G037189.1/OMIW190G038050.1/OMIW190G054922.1/OAUW26G010314.1/OAUW26G011372.1/OAUW26G039405.1/OAUW26G041310.1/OAUW26G07690.1/OOFW323G034223.1/OPUW363G013278.1/OPUW363G037348.1/ORHW375G012827.1/OMEM6G024957.1/OGRW100G045473.1/OGRW100G049706.1/OGRW100G077042.1/OLAW128G047046.1/OLAW128G050330.1/OLAW…	303
GO:0004818	glutamate-tRNA ligase activity	55/190905	61/383722	2.09696e-11	2.36583e-10	9.62825e-11	OMEM6G02055.1/OMEM6G035610.1/OGRW100G046388.1/OGRW100G070790.1/OGRW100G01413.1/OGRW100G068868.1/OLAW128G069366.1/OLAW128G06951.1/OLAW128G01288.1/OLAW128G071687.1/OMAW171G01351.1/OMAW171G070706.1/OMAW171G07273.1/OALW18G049907.1/OALW18G069423.1/OALW18G01426.1/OALW18G072072.1/OMIW190G01325.1/OMIW190G073565.1/OMIW190G071071.1/OMIW190G07243.1/OAUW26G01467.1/OAUW26G036982.1/OOFW323G01876.1/OOFW323G0369…	55
GO:0006424	glutamyl-tRNA aminoacylation	55/190905	61/383722	2.09696e-11	2.36583e-10	9.62825e-11	OMEM6G02055.1/OMEM6G035610.1/OGRW100G046388.1/OGRW100G070790.1/OGRW100G01413.1/OGRW100G068868.1/OLAW128G069366.1/OLAW128G06951.1/OLAW128G01288.1/OLAW128G071687.1/OMAW171G01351.1/OMAW171G070706.1/OMAW171G07273.1/OALW18G049907.1/OALW18G069423.1/OALW18G01426.1/OALW18G072072.1/OMIW190G01325.1/OMIW190G073565.1/OMIW190G071071.1/OMIW190G07243.1/OAUW26G01467.1/OAUW26G036982.1/OOFW323G01876.1/OOFW323G0369…	55
GO:0008534	oxidized purine nucleobase lesion DNA N-glycosylase activity	55/190905	61/383722	2.09696e-11	2.36583e-10	9.62825e-11	OMEM6G08957.1/OGRW100G013977.1/OGRW100G018763.1/OLAW128G014106.1/OLAW128G018720.1/OMAW171G018728.1/OMAW171G013992.1/OALW18G019187.1/OALW18G014364.1/OMIW190G014106.1/OMIW190G018891.1/OAUW26G08832.1/OOFW323G09406.1/OPUW363G013458.1/OPUW363G018560.1/ORHW375G08367.1/OBRW59G07961.1/OEIW71G08598.1/OGLW97G008588.1/OMEM6G025576.1/OGRW100G046071.1/OGRW100G050296.1/OLAW128G047699.1/OLAW128G050909.1/OMAW171…	55
GO:0016866	intramolecular transFtrase activity	166/190905	233/383722	2.1126e-11	2.36895e-10	9.64094e-11	OMEM6G024552.1/OMEM6G038138.1/OMEM6G038145.1/OMEM6G06729.1/OMEM6G06730.1/OGRW100G011939.1/OGRW100G011941.1/OGRW100G045041.1/OGRW100G073744.1/OGRW100G016474.1/OGRW100G049320.1/OGRW100G049332.1/OGRW100G076164.1/OGRW100G076167.1/OLAW128G012030.1/OLAW128G046840.1/OLAW128G046847.1/OLAW128G076693.1/OLAW128G076694.1/OLAW128G049976.1/OLAW128G049985.1/OLAW128G074093.1/OMAW171G016637.1/OMAW171G046882.1/OMA…	166
GO:0007005	mitochondrion organization	60/190905	68/383722	2.20508e-11	2.45766e-10	1.0002e-10	OMEM6G012571.1/OGRW100G010371.1/OGRW100G029301.1/OLAW128G010335.1/OMAW171G030594.1/OMAW171G04588.1/OMAW171G010476.1/OALW18G010590.1/OALW18G026189.1/OALW18G029982.1/OMIW190G025771.1/OMIW190G04577.1/OPUW363G010383.1/OPUW363G025411.1/OPUW363G04712.1/ORHW375G015717.1/ORHW375G04771.1/OBRW59G014150.1/OBRW59G04598.1/OEIW71G05025.1/OGLW97G0015686.1/OGLW97G005088.1/OMEM6G09739.1/OGRW100G015016.1/OGRW100G0…	60
GO:0019346	transsulfuration	110/190905	143/383722	2.3816e-11	2.63842e-10	1.07376e-10	OMEM6G035749.1/OGRW100G044463.1/OGRW100G071245.1/OGRW100G071247.1/OGRW100G048824.1/OGRW100G069020.1/OGRW100G069022.1/OLAW128G046071.1/OLAW128G069576.1/OLAW128G071863.1/OLAW128G071867.1/OMAW171G046282.1/OMAW171G073415.1/OMAW171G073420.1/OMAW171G073423.1/OMAW171G073425.1/OMAW171G049736.1/OMAW171G070918.1/OMAW171G070920.1/OALW18G069905.1/OALW18G069907.1/OALW18G044755.1/OALW18G072237.1/OALW18G072239.…	110
GO:0045132	meiotic chromosome segregation	52/190905	57/383722	2.52109e-11	2.77622e-10	1.12984e-10	OMEM6G017574.1/OGRW100G034845.1/OGRW100G031566.1/OLAW128G032995.1/OLAW128G036443.1/OMAW171G036724.1/OMAW171G032982.1/OALW18G031841.1/OALW18G035520.1/OMIW190G034580.1/OAUW26G018557.1/OOFW323G018392.1/OPUW363G032657.1/ORHW375G018352.1/OBRW59G016295.1/OEIW71G018609.1/OGLW97G0018251.1/OGLW97G0021622.1/OMEM6G010546.1/OGRW100G015829.1/OGRW100G020723.1/OLAW128G016134.1/OLAW128G020609.1/OMAW171G020686.1/…	52
GO:0005096	GTPase activator activity	276/190905	420/383722	2.88771e-11	3.16101e-10	1.28644e-10	OALW18G02535.1/OMEM6G025354.1/OGRW100G045876.1/OGRW100G050117.1/OLAW128G047507.1/OLAW128G050724.1/OMAW171G047723.1/OMAW171G051135.1/OALW18G049393.1/OALW18G045983.1/OMIW190G048085.1/OMIW190G051516.1/OAUW26G026501.1/OOFW323G026197.1/OPUW363G050955.1/OPUW363G047445.1/ORHW375G026268.1/OBRW59G022896.1/OEIW71G026401.1/OGLW97G0026454.1/OMEM6G014369.1/OGRW100G013378.1/OGRW100G022525.1/OGRW100G047604.1/OG…	276
GO:0036297	interstrand cross-link repair	113/190905	148/383722	2.97702e-11	3.23949e-10	1.31838e-10	OMEM6G013015.1/OMEM6G036631.1/OGRW100G021128.1/OGRW100G05656.1/OGRW100G072274.1/OGRW100G069964.1/OLAW128G025757.1/OLAW128G070508.1/OLAW128G020976.1/OLAW128G072774.1/OMAW171G026136.1/OMAW171G074384.1/OMAW171G021070.1/OMAW171G071962.1/OALW18G021458.1/OALW18G05750.1/OALW18G070963.1/OALW18G073203.1/OMIW190G021280.1/OMIW190G074733.1/OMIW190G026231.1/OMIW190G072328.1/OAUW26G011264.1/OAUW26G038290.1/OOF…	113
GO:0003909	DNA ligase activity	54/190905	60/383722	3.80865e-11	4.09597e-10	1.66694e-10	OMEM6G036233.1/OGRW100G071843.1/OGRW100G069577.1/OLAW128G070166.1/OLAW128G072394.1/OMAW171G073958.1/OMAW171G071528.1/OALW18G070510.1/OALW18G072797.1/OMIW190G074303.1/OMIW190G071886.1/OAUW26G037826.1/OOFW323G037742.1/OPUW363G073809.1/OPUW363G071315.1/ORHW375G038103.1/OBRW59G032623.1/OEIW71G038223.1/OGLW97G0038628.1/OMEM6G03919.1/OGRW100G03201.1/OLAW128G08972.1/OLAW128G03089.1/OMAW171G03304.1/OALW1…	54
GO:0004534	5'-3' exoribonuclease activity	54/190905	60/383722	3.80865e-11	4.09597e-10	1.66694e-10	OMEM6G05420.1/OGRW100G010622.1/OGRW100G04637.1/OLAW128G010581.1/OLAW128G04567.1/OMAW171G04831.1/OMAW171G010721.1/OALW18G010839.1/OALW18G04731.1/OMIW190G04836.1/OMIW190G010834.1/OAUW26G05175.1/OOFW323G05325.1/OPUW363G010623.1/OPUW363G04944.1/ORHW375G05035.1/OBRW59G04802.1/OEIW71G05267.1/OGLW97G005329.1/OMEM6G012410.1/OGRW100G025511.1/OGRW100G029144.1/OLAW128G030335.1/OLAW128G025156.1/OMAW171G03043…	54
GO:0005452	inorganic anion exchanger activity	59/190905	67/383722	3.92062e-11	4.16765e-10	1.69611e-10	OMEM6G01319.1/OMEM6G019745.1/OGRW100G037140.1/OGRW100G047144.1/OGRW100G040744.1/OGRW100G0678.1/OLAW128G042000.1/OLAW128G06163.1/OLAW128G038569.1/OLAW128G0579.1/OMAW171G042453.1/OMAW171G0619.1/OMAW171G0622.1/OMAW171G039049.1/OMAW171G06525.1/OALW18G037335.1/OALW18G050683.1/OALW18G040904.1/OALW18G0642.1/OMIW190G042738.1/OMIW190G0614.1/OMIW190G039354.1/OMIW190G06477.1/OAUW26G020843.1/OAUW26G0658.1/OA…	59
GO:0006820	anion transport	59/190905	67/383722	3.92062e-11	4.16765e-10	1.69611e-10	OMEM6G01319.1/OMEM6G019745.1/OGRW100G037140.1/OGRW100G047144.1/OGRW100G040744.1/OGRW100G0678.1/OLAW128G042000.1/OLAW128G06163.1/OLAW128G038569.1/OLAW128G0579.1/OMAW171G042453.1/OMAW171G0619.1/OMAW171G0622.1/OMAW171G039049.1/OMAW171G06525.1/OALW18G037335.1/OALW18G050683.1/OALW18G040904.1/OALW18G0642.1/OMIW190G042738.1/OMIW190G0614.1/OMIW190G039354.1/OMIW190G06477.1/OAUW26G020843.1/OAUW26G0658.1/OA…	59
GO:0003774	motor activity	192/190905	278/383722	5.27191e-11	5.52054e-10	2.2467e-10	OMEM6G010378.1/OGRW100G015646.1/OGRW100G020534.1/OLAW128G015921.1/OLAW128G020415.1/OMAW171G020507.1/OMAW171G015765.1/OALW18G020717.1/OALW18G016178.1/OMIW190G015876.1/OMIW190G020704.1/OAUW26G010705.1/OOFW323G011133.1/OPUW363G015718.1/OPUW363G020372.1/ORHW375G010214.1/OBRW59G09503.1/OEIW71G010368.1/OGLW97G0010218.1/OGLW97G0037683.1/OMEM6G011560.1/OGRW100G024607.1/OGRW100G028333.1/OLAW128G029346.1/O…	192
GO:0016459	myosin complex	192/190905	278/383722	5.27191e-11	5.52054e-10	2.2467e-10	OMEM6G010378.1/OGRW100G015646.1/OGRW100G020534.1/OLAW128G015921.1/OLAW128G020415.1/OMAW171G020507.1/OMAW171G015765.1/OALW18G020717.1/OALW18G016178.1/OMIW190G015876.1/OMIW190G020704.1/OAUW26G010705.1/OOFW323G011133.1/OPUW363G015718.1/OPUW363G020372.1/ORHW375G010214.1/OBRW59G09503.1/OEIW71G010368.1/OGLW97G0010218.1/OGLW97G0037683.1/OMEM6G011560.1/OGRW100G024607.1/OGRW100G028333.1/OLAW128G029346.1/O…	192
GO:0005675	holo TFIIH complex	56/190905	63/383722	5.31341e-11	5.52054e-10	2.2467e-10	OMEM6G023290.1/OMEM6G038554.1/OGRW100G043963.1/OGRW100G074149.1/OGRW100G048317.1/OGRW100G076462.1/OLAW128G045494.1/OLAW128G077089.1/OLAW128G048981.1/OLAW128G074459.1/OMAW171G045756.1/OMAW171G079267.1/OMAW171G049221.1/OMAW171G076231.1/OALW18G047468.1/OALW18G075131.1/OALW18G044248.1/OMIW190G046086.1/OMIW190G079738.1/OMIW190G049588.1/OMIW190G076653.1/OAUW26G024368.1/OAUW26G039932.1/OOFW323G024235.1/…	56
GO:0043240	Fanconi anaemia nuclear complex	56/190905	63/383722	5.31341e-11	5.52054e-10	2.2467e-10	OMEM6G025173.1/OGRW100G045695.1/OGRW100G049898.1/OGRW100G049899.1/OLAW128G047286.1/OLAW128G050554.1/OMAW171G047524.1/OMAW171G050891.1/OALW18G049194.1/OMIW190G047871.1/OMIW190G051293.1/OAUW26G026302.1/OOFW323G025968.1/OPUW363G050740.1/OPUW363G047197.1/ORHW375G026050.1/OBRW59G022721.1/OEIW71G026158.1/OGLW97G0026247.1/OMEM6G010640.1/OGRW100G015931.1/OGRW100G020848.1/OLAW128G016240.1/OLAW128G020714.1…	56
GO:0007010	cytoskeleton organization	157/190905	220/383722	5.88909e-11	6.08429e-10	2.47613e-10	OMEM6G011845.1/OGRW100G024917.1/OGRW100G028598.1/OLAW128G029692.1/OLAW128G024617.1/OMAW171G029903.1/OMAW171G024877.1/OALW18G025411.1/OALW18G029246.1/OMIW190G025033.1/OMIW190G030116.1/OAUW26G015318.1/OOFW323G015452.1/OPUW363G024673.1/OPUW363G029555.1/ORHW375G014924.1/ORHW375G014929.1/OBRW59G013485.1/OEIW71G015249.1/OEIW71G015251.1/OEIW71G015256.1/OEIW71G015262.1/OGLW97G0014918.1/OALW18G015817.1/OM…	157
GO:0016920	pyroglutamyl-peptidase activity	53/190905	59/383722	6.9055e-11	7.09453e-10	2.88727e-10	OMEM6G028962.1/OGRW100G053911.1/OGRW100G064371.1/OGRW100G057388.1/OGRW100G066766.1/OLAW128G054674.1/OLAW128G066896.1/OLAW128G057640.1/OLAW128G064404.1/OMAW171G058378.1/OMAW171G065865.1/OMAW171G054951.1/OMAW171G068252.1/OALW18G054249.1/OALW18G067340.1/OALW18G057779.1/OALW18G064784.1/OMIW190G055328.1/OMIW190G068735.1/OMIW190G058585.1/OMIW190G066038.1/OAUW26G030381.1/OAUW26G034647.1/OOFW323G034457.1…	53
GO:0005853	eukaryotic translation elongation factor 1 complex	58/190905	66/383722	6.95756e-11	7.10831e-10	2.89288e-10	OMEM6G015318.1/OMEM6G028758.1/OGRW100G023454.1/OGRW100G053710.1/OGRW100G027339.1/OGRW100G057178.1/OLAW128G028224.1/OLAW128G054478.1/OLAW128G023280.1/OLAW128G057444.1/OMAW171G028550.1/OMAW171G023460.1/OMAW171G054725.1/OALW18G023880.1/OALW18G054041.1/OALW18G027946.1/OALW18G027947.1/OALW18G057578.1/OMIW190G023636.1/OMIW190G055103.1/OMIW190G028902.1/OMIW190G058357.1/OAUW26G013714.1/OAUW26G030164.1/OO…	58
GO:0030955	potassium ion binding	156/190905	219/383722	8.48309e-11	8.5737e-10	3.48925e-10	OMEM6G037462.1/OMEM6G040030.1/OGRW100G073006.1/OGRW100G077891.1/OGRW100G075523.1/OGRW100G080216.1/OLAW128G075869.1/OLAW128G081002.1/OLAW128G073471.1/OLAW128G078740.1/OMAW171G077941.1/OMAW171G080728.1/OMAW171G075090.1/OMAW171G083234.1/OALW18G073943.1/OALW18G079151.1/OALW18G076617.1/OALW18G081572.1/OMIW190G078394.1/OMIW190G083737.1/OMIW190G075461.1/OMIW190G081098.1/OAUW26G038929.1/OAUW26G041273.1/O…	156
GO:0003746	translation elongation factor activity	283/190905	435/383722	8.48512e-11	8.5737e-10	3.48925e-10	OMEM6G012087.1/OMEM6G028650.1/OMEM6G041251.1/OGRW100G025231.1/OGRW100G051099.1/OGRW100G053590.1/OGRW100G079096.1/OGRW100G028873.1/OGRW100G054858.1/OGRW100G057067.1/OGRW100G081280.1/OLAW128G030029.1/OLAW128G051702.1/OLAW128G054337.1/OLAW128G082294.1/OLAW128G024884.1/OLAW128G055205.1/OLAW128G057328.1/OLAW128G079881.1/OMAW171G030216.1/OMAW171G055559.1/OMAW171G058055.1/OMAW171G081954.1/OMAW171G025203…	283
GO:0015937	coenzyme A biosynthetic process	60/190905	69/383722	8.65289e-11	8.69544e-10	3.5388e-10	OMEM6G02480.1/OGRW100G07640.1/OGRW100G01899.1/OLAW128G07501.1/OLAW128G01763.1/OMAW171G01897.1/OMAW171G01906.1/OMAW171G07796.1/OALW18G07836.1/OALW18G01911.1/OMIW190G01901.1/OMIW190G01907.1/OMIW190G07789.1/OAUW26G02116.1/OOFW323G02410.1/OPUW363G07753.1/OPUW363G07763.1/OPUW363G02008.1/ORHW375G02090.1/OBRW59G02243.1/OEIW71G02342.1/OGLW97G002228.1/OMEM6G023559.1/OGRW100G044205.1/OGRW100G048555.1/OLAW1…	60
GO:0006772	thiamine metabolic process	55/190905	62/383722	9.51696e-11	9.46037e-10	3.8501e-10	OMEM6G020925.1/OMEM6G027004.1/OMEM6G05922.1/OGRW100G038349.1/OGRW100G041722.1/OGRW100G05113.1/OLAW128G011091.1/OLAW128G043058.1/OLAW128G039530.1/OLAW128G05042.1/OMAW171G043467.1/OMAW171G05338.1/OMAW171G011201.1/OMAW171G040052.1/OALW18G038437.1/OALW18G041913.1/OALW18G05225.1/OMIW190G043778.1/OMIW190G05358.1/OMIW190G011326.1/OMIW190G040340.1/OAUW26G021899.1/OAUW26G05706.1/OOFW323G021758.1/OOFW323G0…	55
GO:0032777	Piccolo NuA4 histone acetyltransFtrase complex	55/190905	62/383722	9.51696e-11	9.46037e-10	3.8501e-10	OMEM6G030848.1/OMEM6G032944.1/OGRW100G059227.1/OGRW100G063880.1/OGRW100G061950.1/OGRW100G066338.1/OLAW128G061655.1/OLAW128G066353.1/OLAW128G059168.1/OLAW128G063972.1/OMAW171G063146.1/OMAW171G065292.1/OMAW171G060201.1/OMAW171G067776.1/OALW18G059688.1/OALW18G066867.1/OALW18G062379.1/OALW18G064358.1/OMIW190G060496.1/OMIW190G068176.1/OMIW190G063475.1/OMIW190G065549.1/OAUW26G032136.1/OAUW26G034143.1/O…	55
GO:0005681	spliceosomal complex	256/190905	389/383722	1.16719e-10	1.15401e-09	4.69649e-10	OGRW100G024722.1/OGRW100G028424.1/OLAW128G029469.1/OLAW128G024434.1/OMAW171G029725.1/OMAW171G024672.1/OALW18G025196.1/OALW18G029064.1/OMIW190G024868.1/OMIW190G029915.1/OAUW26G015099.1/OOFW323G015240.1/OPUW363G024504.1/OPUW363G024505.1/OPUW363G029356.1/ORHW375G014720.1/OBRW59G013326.1/OEIW71G015048.1/OGLW97G0014733.1/OMEM6G014079.1/OMEM6G06367.1/OGRW100G011606.1/OGRW100G022223.1/OGRW100G06752.1/OG…	256
GO:0004743	pyruvate kinase activity	155/190905	218/383722	1.21981e-10	1.19959e-09	4.88197e-10	OMEM6G037462.1/OMEM6G040030.1/OGRW100G073006.1/OGRW100G077891.1/OGRW100G075523.1/OGRW100G080216.1/OLAW128G075869.1/OLAW128G081002.1/OLAW128G073471.1/OLAW128G078740.1/OMAW171G077941.1/OMAW171G080728.1/OMAW171G075090.1/OMAW171G083234.1/OALW18G073943.1/OALW18G079151.1/OALW18G076617.1/OALW18G081572.1/OMIW190G078394.1/OMIW190G083737.1/OMIW190G075461.1/OMIW190G081098.1/OAUW26G038929.1/OAUW26G041273.1/O…	155
GO:0004527	exonuclease activity	57/190905	65/383722	1.23226e-10	1.20539e-09	4.90558e-10	OMEM6G05420.1/OGRW100G010622.1/OGRW100G04637.1/OLAW128G010581.1/OLAW128G04567.1/OMAW171G04831.1/OMAW171G010721.1/OALW18G010839.1/OALW18G04731.1/OMIW190G04836.1/OMIW190G010834.1/OAUW26G05175.1/OOFW323G05325.1/OPUW363G010623.1/OPUW363G04944.1/ORHW375G05035.1/OBRW59G04802.1/OEIW71G05267.1/OGLW97G005329.1/OMEM6G012410.1/OGRW100G025511.1/OGRW100G029144.1/OLAW128G030335.1/OLAW128G025156.1/OMAW171G03043…	57
GO:0019008	molybdopterin synthase complex	52/190905	58/383722	1.24979e-10	1.21606e-09	4.94903e-10	OMEM6G041250.1/OGRW100G012896.1/OGRW100G079091.1/OGRW100G081279.1/OLAW128G012983.1/OLAW128G082292.1/OLAW128G079880.1/OMAW171G017561.1/OMAW171G081953.1/OMAW171G012959.1/OMAW171G084403.1/OALW18G018057.1/OALW18G080434.1/OALW18G082711.1/OMIW190G012953.1/OMIW190G084998.1/OMIW190G017824.1/OMIW190G082488.1/OAUW26G042624.1/OOFW323G043317.1/OOFW323G08352.1/OPUW363G012814.1/OPUW363G081901.1/OPUW363G017520.…	52
GO:0016874	ligase activity	164/190905	233/383722	1.29411e-10	1.25256e-09	5.09758e-10	OGRW100G081335.1/OMAW171G080040.1/OMAW171G082048.1/OMAW171G077143.1/OALW18G082778.1/OMIW190G080464.1/OMIW190G085090.1/OAUW26G042736.1/OPUW363G081997.1/ORHW375G041637.1/OGLW97G0044535.1/OMEM6G041837.1/OGRW100G079723.1/OGRW100G081849.1/OLAW128G083003.1/OLAW128G080488.1/OMAW171G082673.1/OMAW171G084135.1/OMAW171G085118.1/OALW18G081069.1/OALW18G083320.1/OMIW190G085706.1/OMIW190G082033.1/OMIW190G083219…	164
GO:0043248	proteasome assembly	136/190905	187/383722	1.30829e-10	1.25966e-09	5.12646e-10	OMEM6G011119.1/OMEM6G08954.1/OGRW100G015836.1/OGRW100G024002.1/OGRW100G020731.1/OGRW100G027746.1/OLAW128G016141.1/OLAW128G028725.1/OLAW128G020617.1/OLAW128G023767.1/OMAW171G020693.1/OMAW171G028992.1/OMAW171G015982.1/OMAW171G023885.1/OALW18G021079.1/OALW18G024424.1/OALW18G016374.1/OALW18G028352.1/OMIW190G016066.1/OMIW190G024082.1/OMIW190G020903.1/OMIW190G029104.1/OAUW26G010897.1/OAUW26G014283.1/OO…	136
GO:0008612	peptidyl-lysine modification to peptidyl-hypusine	68/190905	81/383722	1.43742e-10	1.37678e-09	5.6031e-10	OMEM6G011971.1/OMEM6G033519.1/OGRW100G025068.1/OGRW100G064532.1/OGRW100G028739.1/OGRW100G066907.1/OLAW128G067050.1/OLAW128G024755.1/OLAW128G064568.1/OMAW171G030064.1/OMAW171G066036.1/OMAW171G025037.1/OMAW171G068422.1/OALW18G025563.1/OALW18G067502.1/OALW18G029390.1/OALW18G064936.1/OMIW190G068895.1/OMIW190G030286.1/OMIW190G066195.1/OAUW26G015464.1/OAUW26G034793.1/OOFW323G015614.1/OOFW323G034630.1/O…	68
GO:0000127	transcription factor TFIIIC complex	84/190905	105/383722	1.50398e-10	1.43306e-09	5.83216e-10	OMEM6G023516.1/OMEM6G09275.1/OGRW100G014523.1/OGRW100G039908.1/OGRW100G019336.1/OGRW100G043185.1/OLAW128G014739.1/OLAW128G044671.1/OLAW128G019302.1/OLAW128G040983.1/OMAW171G018109.1/OMAW171G019327.1/OMAW171G044976.1/OMAW171G014590.1/OMAW171G041597.1/OALW18G019749.1/OALW18G040044.1/OALW18G040046.1/OALW18G014974.1/OALW18G043447.1/OMIW190G013512.1/OMIW190G013515.1/OMIW190G045323.1/OMIW190G045324.1/O…	84
GO:0061578	Lys63-specific deubiquitinase activity	95/190905	122/383722	1.6077e-10	1.524e-09	6.20224e-10	OMEM6G02030.1/OMEM6G020960.1/OGRW100G038383.1/OGRW100G046420.1/OGRW100G01384.1/OGRW100G041745.1/OLAW128G043094.1/OLAW128G06926.1/OLAW128G01259.1/OLAW128G039553.1/OMAW171G043501.1/OMAW171G040085.1/OALW18G038473.1/OALW18G049939.1/OALW18G01390.1/OALW18G041937.1/OMIW190G043817.1/OMIW190G040354.1/OAUW26G01440.1/OAUW26G021939.1/OOFW323G01848.1/OOFW323G021788.1/OPUW363G039675.1/OPUW363G01384.1/OPUW363G0…	95
GO:0003951	NAD+ kinase activity	267/190905	409/383722	1.6705e-10	1.57541e-09	6.41147e-10	OEIW71G04568.1/OMEM6G041573.1/OGRW100G079417.1/OLAW128G082665.1/OLAW128G080192.1/OMAW171G082353.1/OMAW171G084792.1/OALW18G080760.1/OALW18G083027.1/OMIW190G085393.1/OMIW190G082903.1/OAUW26G043009.1/OOFW323G043695.1/OPUW363G082291.1/OPUW363G084816.1/ORHW375G044125.1/OBRW59G037329.1/OEIW71G044228.1/OGLW97G0044869.1/OMEM6G04702.1/OGRW100G09912.1/OGRW100G03987.1/OLAW128G09840.1/OLAW128G03882.1/OMAW171…	267
GO:0006400	tRNA modification	175/190905	252/383722	1.82522e-10	1.71254e-09	6.96954e-10	OMEM6G022155.1/OGRW100G039598.1/OGRW100G042918.1/OGRW100G048880.1/OLAW128G044340.1/OLAW128G040703.1/OMAW171G044685.1/OMAW171G041287.1/OMAW171G041297.1/OALW18G039722.1/OALW18G043160.1/OALW18G044807.1/OMIW190G045039.1/OMIW190G041573.1/OAUW26G023303.1/OOFW323G023026.1/OOFW323G023037.1/OPUW363G040885.1/OPUW363G044366.1/ORHW375G023070.1/OBRW59G020253.1/OEIW71G023220.1/OGLW97G0022947.1/OMEM6G09572.1/OG…	175
GO:0004788	thiamine diphosphokinase activity	56/190905	64/383722	2.17804e-10	2.02293e-09	8.23277e-10	OMEM6G020925.1/OMEM6G027004.1/OMEM6G05922.1/OGRW100G038349.1/OGRW100G041722.1/OGRW100G05113.1/OLAW128G011091.1/OLAW128G043058.1/OLAW128G039530.1/OLAW128G05042.1/OMAW171G043467.1/OMAW171G05338.1/OMAW171G011201.1/OMAW171G040052.1/OALW18G038437.1/OALW18G041913.1/OALW18G05225.1/OMIW190G043778.1/OMIW190G05358.1/OMIW190G011326.1/OMIW190G040340.1/OAUW26G021899.1/OAUW26G05706.1/OOFW323G021758.1/OOFW323G0…	56
GO:0009229	thiamine diphosphate biosynthetic process	56/190905	64/383722	2.17804e-10	2.02293e-09	8.23277e-10	OMEM6G020925.1/OMEM6G027004.1/OMEM6G05922.1/OGRW100G038349.1/OGRW100G041722.1/OGRW100G05113.1/OLAW128G011091.1/OLAW128G043058.1/OLAW128G039530.1/OLAW128G05042.1/OMAW171G043467.1/OMAW171G05338.1/OMAW171G011201.1/OMAW171G040052.1/OALW18G038437.1/OALW18G041913.1/OALW18G05225.1/OMIW190G043778.1/OMIW190G05358.1/OMIW190G011326.1/OMIW190G040340.1/OAUW26G021899.1/OAUW26G05706.1/OOFW323G021758.1/OOFW323G0…	56
GO:0008835	diaminohydroxyphosphoribosylaminopyrimidine deaminase activity	51/190905	57/383722	2.25769e-10	2.08638e-09	8.49097e-10	OMEM6G013116.1/OMEM6G037054.1/OMEM6G037070.1/OGRW100G021215.1/OGRW100G032907.1/OGRW100G05736.1/OGRW100G030006.1/OGRW100G04836.1/OLAW128G025855.1/OLAW128G031221.1/OLAW128G021072.1/OLAW128G034947.1/OMAW171G026224.1/OMAW171G034950.1/OMAW171G021152.1/OALW18G021554.1/OALW18G05859.1/OALW18G033838.1/OALW18G04928.1/OMIW190G021359.1/OMIW190G035406.1/OMIW190G026315.1/OAUW26G011343.1/OOFW323G011852.1/OPUW36…	51
GO:0030975	thiamine binding	53/190905	60/383722	3.03531e-10	2.79097e-09	1.13584e-09	OMEM6G020925.1/OMEM6G027004.1/OMEM6G05922.1/OGRW100G038349.1/OGRW100G041722.1/OGRW100G05113.1/OLAW128G011091.1/OLAW128G043058.1/OLAW128G039530.1/OLAW128G05042.1/OMAW171G043467.1/OMAW171G05338.1/OMAW171G011201.1/OMAW171G040052.1/OALW18G038437.1/OALW18G041913.1/OALW18G05225.1/OMIW190G043778.1/OMIW190G05358.1/OMIW190G011326.1/OMIW190G040340.1/OAUW26G021899.1/OAUW26G05706.1/OOFW323G021758.1/OOFW323G0…	53
GO:0003906	DNA-(apurinic or apyrimidinic site) lyase activity	60/190905	70/383722	3.10117e-10	2.83734e-09	1.15472e-09	OGRW100G050831.1/OMEM6G025576.1/OGRW100G046071.1/OGRW100G050296.1/OLAW128G047699.1/OLAW128G050909.1/OLAW128G051418.1/OMAW171G047917.1/OMAW171G051338.1/OALW18G049584.1/OALW18G046183.1/OMIW190G048274.1/OMIW190G051724.1/OAUW26G026706.1/OOFW323G026398.1/OPUW363G051154.1/OPUW363G047661.1/ORHW375G026473.1/OBRW59G023096.1/OEIW71G026597.1/OGLW97G0026683.1/OBRW59G027514.1/OMEM6G030483.1/OGRW100G059047.1/O…	60
GO:0004373	glycogen (starch) synthase activity	146/190905	205/383722	3.41269e-10	3.1069e-09	1.26442e-09	OMEM6G027373.1/OGRW100G052396.1/OGRW100G055989.1/OLAW128G053060.1/OLAW128G056298.1/OMAW171G056818.1/OMAW171G053390.1/OALW18G052754.1/OALW18G056349.1/OMIW190G053837.1/OMIW190G057068.1/OAUW26G028747.1/OOFW323G028587.1/OPUW363G056562.1/OPUW363G056564.1/OPUW363G053255.1/ORHW375G028735.1/OBRW59G024755.1/OEIW71G028865.1/OGLW97G0028997.1/OMEM6G023769.1/OGRW100G044390.1/OGRW100G048741.1/OLAW128G045973.1/…	146
GO:0005784	Sec61 translocon complex	68/190905	82/383722	4.30469e-10	3.89967e-09	1.58705e-09	OMEM6G01006.1/OMEM6G037126.1/OMEM6G039706.1/OGRW100G072646.1/OGRW100G077508.1/OGRW100G075225.1/OGRW100G079889.1/OLAW128G075518.1/OLAW128G080597.1/OLAW128G073179.1/OLAW128G078426.1/OMAW171G077598.1/OMAW171G080388.1/OMAW171G074736.1/OMAW171G082830.1/OALW18G073566.1/OALW18G078754.1/OALW18G076303.1/OALW18G081249.1/OMIW190G078058.1/OMIW190G083391.1/OMIW190G075103.1/OAUW26G038621.1/OAUW26G040966.1/OOFW…	68
GO:0016573	histone acetylation	98/190905	128/383722	4.54441e-10	4.09365e-09	1.666e-09	OMEM6G026124.1/OGRW100G026338.1/OGRW100G050804.1/OLAW128G048243.1/OLAW128G051392.1/OMAW171G048437.1/OMAW171G051733.1/OALW18G026891.1/OALW18G046692.1/OMIW190G048773.1/OMIW190G052242.1/OAUW26G027236.1/OOFW323G026918.1/OPUW363G051670.1/OPUW363G048157.1/ORHW375G026996.1/OBRW59G023571.1/OEIW71G027094.1/OGLW97G0027248.1/OMEM6G033176.1/OGRW100G064151.1/OGRW100G066563.1/OLAW128G066675.1/OLAW128G064196.1/…	98
GO:0000814	ESCRT II complex	57/190905	66/383722	4.63013e-10	4.09365e-09	1.666e-09	OMEM6G034358.1/OGRW100G065388.1/OGRW100G067728.1/OLAW128G067893.1/OLAW128G065406.1/OMAW171G066895.1/OMAW171G069245.1/OALW18G068370.1/OALW18G065786.1/OMIW190G069750.1/OMIW190G067018.1/OAUW26G035660.1/OOFW323G035495.1/OPUW363G069163.1/OPUW363G066535.1/ORHW375G035818.1/OBRW59G030732.1/OEIW71G036171.1/OGLW97G0036371.1/OMEM6G03725.1/OGRW100G08893.1/OGRW100G03029.1/OLAW128G08787.1/OLAW128G02921.1/OMAW1…	57
GO:0004363	glutathione synthase activity	57/190905	66/383722	4.63013e-10	4.09365e-09	1.666e-09	OMEM6G039361.1/OMEM6G041313.1/OGRW100G074912.1/OGRW100G079174.1/OGRW100G077214.1/OGRW100G081335.1/OLAW128G078025.1/OLAW128G082383.1/OLAW128G075208.1/OLAW128G079954.1/OMAW171G080040.1/OMAW171G082048.1/OMAW171G077143.1/OMAW171G084505.1/OALW18G075980.1/OALW18G080512.1/OALW18G078444.1/OALW18G082778.1/OMIW190G080464.1/OMIW190G085090.1/OMIW190G077614.1/OMIW190G082574.1/OAUW26G040661.1/OAUW26G042736.1/O…	57
GO:0008417	fucosyltransFtrase activity	57/190905	66/383722	4.63013e-10	4.09365e-09	1.666e-09	OMEM6G017036.1/OGRW100G034298.1/OGRW100G031032.1/OLAW128G032436.1/OLAW128G035892.1/OMAW171G036162.1/OMAW171G032417.1/OALW18G031277.1/OALW18G034968.1/OMIW190G036532.1/OMIW190G032814.1/OAUW26G017985.1/OOFW323G017858.1/OPUW363G035850.1/OPUW363G032137.1/ORHW375G017768.1/OBRW59G015796.1/OEIW71G018052.1/OGLW97G0017691.1/OMEM6G031530.1/OGRW100G059924.1/OGRW100G062592.1/OLAW128G062730.1/OLAW128G059807.1/…	57
GO:0008661	1-deoxy-D-xylulose-5-phosphate synthase activity	57/190905	66/383722	4.63013e-10	4.09365e-09	1.666e-09	OMEM6G021228.1/OGRW100G038659.1/OGRW100G042010.1/OLAW128G043359.1/OLAW128G039781.1/OMAW171G043730.1/OMAW171G040325.1/OALW18G038749.1/OALW18G042181.1/OMIW190G044083.1/OMIW190G040597.1/OAUW26G022216.1/OOFW323G022061.1/OPUW363G039955.1/OPUW363G043405.1/ORHW375G022089.1/OBRW59G019423.1/OEIW71G022238.1/OGLW97G0021867.1/OMEM6G023074.1/OGRW100G043720.1/OGRW100G048091.1/OLAW128G045249.1/OLAW128G048768.1/…	57
GO:0006367	transcription initiation from RNA polymerase II promoter	244/190905	372/383722	5.02515e-10	4.42165e-09	1.79949e-09	OGRW100G039379.1/OMEM6G06175.1/OGRW100G011431.1/OGRW100G058179.1/OGRW100G040221.1/OGRW100G05390.1/OLAW128G011404.1/OLAW128G060930.1/OLAW128G038072.1/OLAW128G05325.1/OMAW171G041924.1/OMAW171G05645.1/OMAW171G011472.1/OMAW171G059225.1/OALW18G011613.1/OALW18G058610.1/OALW18G040366.1/OALW18G05511.1/OMIW190G042208.1/OMIW190G05671.1/OMIW190G011618.1/OMIW190G062472.1/OAUW26G020293.1/OAUW26G06011.1/OOFW32…	244
GO:0006790	sulfur compound metabolic process	47/190905	52/383722	5.19013e-10	4.52353e-09	1.84095e-09	OMEM6G040295.1/OGRW100G078499.1/OGRW100G080433.1/OGRW100G080434.1/OLAW128G081274.1/OLAW128G078965.1/OLAW128G078966.1/OMAW171G081001.1/OMAW171G081002.1/OMAW171G083504.1/OALW18G079801.1/OALW18G081802.1/OALW18G081803.1/OMIW190G084008.1/OMIW190G084009.1/OMIW190G081357.1/OAUW26G041561.1/OAUW26G041562.1/OOFW323G042369.1/OPUW363G080836.1/OPUW363G080837.1/OPUW363G083446.1/OPUW363G083447.1/ORHW375G042763.…	47
GO:0008441	3'(2'),5'-bisphosphate nucleotidase activity	47/190905	52/383722	5.19013e-10	4.52353e-09	1.84095e-09	OMEM6G040295.1/OGRW100G078499.1/OGRW100G080433.1/OGRW100G080434.1/OLAW128G081274.1/OLAW128G078965.1/OLAW128G078966.1/OMAW171G081001.1/OMAW171G081002.1/OMAW171G083504.1/OALW18G079801.1/OALW18G081802.1/OALW18G081803.1/OMIW190G084008.1/OMIW190G084009.1/OMIW190G081357.1/OAUW26G041561.1/OAUW26G041562.1/OOFW323G042369.1/OPUW363G080836.1/OPUW363G080837.1/OPUW363G083446.1/OPUW363G083447.1/ORHW375G042763.…	47
GO:0004376	glycolipid mannosyltransFtrase activity	59/190905	69/383722	5.36002e-10	4.64956e-09	1.89224e-09	OMEM6G06449.1/OMEM6G07338.1/OGRW100G011668.1/OGRW100G016193.1/OLAW128G011755.1/OLAW128G016537.1/OMAW171G02543.1/OMAW171G011697.1/OALW18G016874.1/OALW18G012111.1/OMIW190G02538.1/OMIW190G016568.1/OAUW26G06327.1/OOFW323G07052.1/OPUW363G08374.1/OPUW363G016279.1/ORHW375G06037.1/OBRW59G05948.1/OEIW71G06228.1/OGLW97G003025.1/OGLW97G006319.1/OMEM6G011464.1/OGRW100G024515.1/OGRW100G028237.1/OLAW128G029259…	59
GO:0006471	protein ADP-ribosylation	61/190905	72/383722	5.99934e-10	5.17971e-09	2.108e-09	OMEM6G010797.1/OMEM6G02440.1/OGRW100G07590.1/OGRW100G01856.1/OLAW128G07436.1/OLAW128G01728.1/OMAW171G01824.1/OMAW171G01825.1/OMAW171G07754.1/OALW18G07789.1/OALW18G01863.1/OMIW190G01833.1/OMIW190G01834.1/OMIW190G07745.1/OAUW26G02063.1/OOFW323G02352.1/OPUW363G07690.1/OPUW363G07691.1/OPUW363G01951.1/ORHW375G02040.1/OBRW59G02189.1/OEIW71G02292.1/OGLW97G002171.1/OMEM6G027488.1/OGRW100G052405.1/OGRW100…	61
GO:0007034	vacuolar transport	231/190905	350/383722	6.06214e-10	5.20947e-09	2.12011e-09	OMIW190G068068.1/OMEM6G037286.1/OMEM6G039841.1/OGRW100G072801.1/OGRW100G077676.1/OGRW100G075366.1/OGRW100G080037.1/OLAW128G080784.1/OLAW128G073319.1/OLAW128G078567.1/OMAW171G077733.1/OMAW171G080547.1/OMAW171G074894.1/OMAW171G083028.1/OALW18G073722.1/OALW18G078929.1/OALW18G076454.1/OALW18G081389.1/OMIW190G078185.1/OMIW190G083546.1/OMIW190G075258.1/OMIW190G080891.1/OAUW26G038778.1/OAUW26G041111.1/O…	231
GO:0003910	DNA ligase (ATP) activity	56/190905	65/383722	8.06287e-10	6.89657e-09	2.80671e-09	OMEM6G036233.1/OGRW100G071843.1/OGRW100G069577.1/OLAW128G070166.1/OLAW128G072394.1/OMAW171G073958.1/OMAW171G071528.1/OALW18G070510.1/OALW18G072797.1/OMIW190G074303.1/OMIW190G071886.1/OAUW26G037826.1/OOFW323G037742.1/OPUW363G073809.1/OPUW363G071315.1/ORHW375G038103.1/OBRW59G032623.1/OEIW71G038223.1/OGLW97G0038628.1/OMEM6G03919.1/OGRW100G09084.1/OGRW100G03201.1/OLAW128G08972.1/OLAW128G03089.1/OMAW1…	56
GO:0016255	attachment of GPI anchor to protein	86/190905	110/383722	8.11252e-10	6.90691e-09	2.81092e-09	OMEM6G05397.1/OMEM6G09677.1/OGRW100G010599.1/OGRW100G014963.1/OGRW100G019752.1/OLAW128G010555.1/OLAW128G015166.1/OLAW128G019746.1/OMAW171G019747.1/OMAW171G04808.1/OMAW171G014994.1/OALW18G010819.1/OALW18G020188.1/OALW18G015373.1/OMIW190G015125.1/OMIW190G04804.1/OMIW190G019950.1/OAUW26G09920.1/OOFW323G010427.1/OOFW323G05304.1/OPUW363G014989.1/OPUW363G019585.1/OPUW363G04919.1/ORHW375G09448.1/OBRW59G…	86
GO:0006850	mitochondrial pyruvate transmembrane transport	93/190905	121/383722	8.7278e-10	7.39651e-09	3.01017e-09	OMEM6G027618.1/OMEM6G030875.1/OGRW100G052606.1/OGRW100G059253.1/OGRW100G072257.1/OGRW100G056146.1/OGRW100G056730.1/OLAW128G053264.1/OLAW128G053999.1/OLAW128G061629.1/OLAW128G070528.1/OLAW128G056426.1/OLAW128G056995.1/OLAW128G059183.1/OLAW128G072756.1/OMAW171G057700.1/OMAW171G063174.1/OMAW171G074364.1/OMAW171G053561.1/OMAW171G060220.1/OMAW171G071943.1/OALW18G052950.1/OALW18G059717.1/OALW18G070947.…	93
GO:0005743	mitochondrial inner membrane	248/190905	381/383722	1.09097e-09	9.20317e-09	3.74543e-09	OAUW26G016281.1/OMEM6G027618.1/OMEM6G030875.1/OGRW100G052606.1/OGRW100G059253.1/OGRW100G072257.1/OGRW100G056146.1/OGRW100G056730.1/OLAW128G053264.1/OLAW128G053999.1/OLAW128G061629.1/OLAW128G070528.1/OLAW128G056426.1/OLAW128G056995.1/OLAW128G059183.1/OLAW128G072756.1/OMAW171G057700.1/OMAW171G063174.1/OMAW171G074364.1/OMAW171G053561.1/OMAW171G060220.1/OMAW171G071943.1/OALW18G052950.1/OALW18G059717.…	248
GO:0080048	GDP-D-glucose phosphorylase activity	43/190905	47/383722	1.14101e-09	9.53924e-09	3.8822e-09	OLAW128G082903.1/OALW18G083244.1/OMIW190G083128.1/OAUW26G043228.1/OPUW363G085038.1/OMEM6G05658.1/OGRW100G010855.1/OGRW100G04871.1/OLAW128G010822.1/OLAW128G04802.1/OMAW171G05069.1/OMAW171G010946.1/OALW18G011066.1/OALW18G04960.1/OMIW190G05065.1/OMIW190G011064.1/OAUW26G05413.1/OOFW323G05548.1/OPUW363G010857.1/OPUW363G05190.1/ORHW375G05268.1/OBRW59G05016.1/OEIW71G05499.1/OGLW97G005564.1/OMEM6G040310.…	43
GO:0016614	oxidoreductase activity, acting on CH-OH group of donors	215/190905	324/383722	1.14118e-09	9.53924e-09	3.8822e-09	OMEM6G036101.1/OMEM6G036102.1/OMEM6G036108.1/OGRW100G071638.1/OGRW100G071643.1/OGRW100G069461.1/OGRW100G069463.1/OLAW128G070046.1/OLAW128G070054.1/OLAW128G072286.1/OMAW171G073845.1/OMAW171G073849.1/OMAW171G073850.1/OMAW171G071388.1/OMAW171G071394.1/OMAW171G071396.1/OALW18G070385.1/OALW18G070389.1/OALW18G072670.1/OALW18G072671.1/OMIW190G074190.1/OMIW190G074195.1/OMIW190G071765.1/OMIW190G071769.1/O…	215
GO:0000902	cell morphogenesis	99/190905	131/383722	1.30758e-09	1.08458e-08	4.41392e-09	OMEM6G011845.1/OGRW100G024917.1/OGRW100G028598.1/OLAW128G029692.1/OLAW128G024617.1/OMAW171G029903.1/OMAW171G024877.1/OALW18G025411.1/OALW18G029246.1/OMIW190G025033.1/OMIW190G030116.1/OAUW26G015318.1/OOFW323G015452.1/OPUW363G024673.1/OPUW363G029555.1/ORHW375G014924.1/ORHW375G014929.1/OBRW59G013485.1/OEIW71G015249.1/OEIW71G015251.1/OEIW71G015256.1/OEIW71G015262.1/OGLW97G0014918.1/OMEM6G07192.1/OGRW…	99
GO:0004865	protein serine/threonine phosphatase inhibitor activity	48/190905	54/383722	1.31517e-09	1.08458e-08	4.41392e-09	OMEM6G016432.1/OMEM6G03656.1/OGRW100G037650.1/OGRW100G038454.1/OGRW100G041218.1/OGRW100G041825.1/OLAW128G042493.1/OLAW128G043157.1/OLAW128G038941.1/OLAW128G039617.1/OMAW171G035393.1/OMAW171G042923.1/OMAW171G039566.1/OMAW171G040146.1/OALW18G037857.1/OALW18G038540.1/OALW18G041380.1/OALW18G042007.1/OMIW190G035801.1/OMIW190G043224.1/OMIW190G039860.1/OMIW190G040419.1/OAUW26G021330.1/OOFW323G021248.1/O…	48
GO:0032515	negative regulation of phosphoprotein phosphatase activity	48/190905	54/383722	1.31517e-09	1.08458e-08	4.41392e-09	OMEM6G016432.1/OMEM6G03656.1/OGRW100G037650.1/OGRW100G038454.1/OGRW100G041218.1/OGRW100G041825.1/OLAW128G042493.1/OLAW128G043157.1/OLAW128G038941.1/OLAW128G039617.1/OMAW171G035393.1/OMAW171G042923.1/OMAW171G039566.1/OMAW171G040146.1/OALW18G037857.1/OALW18G038540.1/OALW18G041380.1/OALW18G042007.1/OMIW190G035801.1/OMIW190G043224.1/OMIW190G039860.1/OMIW190G040419.1/OAUW26G021330.1/OOFW323G021248.1/O…	48
GO:0000045	autophagosome assembly	81/190905	103/383722	1.50147e-09	1.23268e-08	5.01664e-09	OGRW100G044192.1/OLAW128G045772.1/OEIW71G024595.1/OGLW97G0024468.1/OMEM6G07041.1/OGRW100G012263.1/OGRW100G016761.1/OLAW128G012395.1/OLAW128G017069.1/OMAW171G016947.1/OMAW171G012319.1/OALW18G017385.1/OALW18G012694.1/OMIW190G012357.1/OMIW190G017212.1/OAUW26G06874.1/OOFW323G07698.1/OPUW363G012224.1/OPUW363G016870.1/ORHW375G06657.1/OBRW59G06453.1/OEIW71G06837.1/OGLW97G006926.1/OMEM6G09350.1/OGRW100G0…	81
GO:0000911	cytokinesis by cell plate formation	57/190905	67/383722	1.59004e-09	1.27689e-08	5.19658e-09	OMEM6G05892.1/OGRW100G011112.1/OGRW100G05087.1/OLAW128G011064.1/OLAW128G05015.1/OMAW171G05313.1/OMAW171G011176.1/OALW18G011319.1/OALW18G05199.1/OMIW190G05331.1/OMIW190G011301.1/OAUW26G05671.1/OOFW323G05808.1/OPUW363G011143.1/OPUW363G05422.1/ORHW375G05527.1/OBRW59G05251.1/OEIW71G05746.1/OGLW97G005788.1/OMEM6G019540.1/OGRW100G036924.1/OGRW100G040532.1/OLAW128G041760.1/OLAW128G038378.1/OMAW171G04224…	57
GO:0006537	glutamate biosynthetic process	57/190905	67/383722	1.59004e-09	1.27689e-08	5.19658e-09	OMEM6G03904.1/OGRW100G09070.1/OGRW100G03187.1/OLAW128G08956.1/OLAW128G03078.1/OMAW171G03285.1/OMAW171G08825.1/OALW18G09262.1/OALW18G03237.1/OMIW190G03285.1/OMIW190G08822.1/OAUW26G03534.1/OOFW323G03777.1/OPUW363G09125.1/OPUW363G03398.1/ORHW375G03469.1/OBRW59G03517.1/OEIW71G03736.1/OGLW97G003799.1/OMEM6G022357.1/OGRW100G039752.1/OGRW100G043051.1/OLAW128G044510.1/OLAW128G040845.1/OMAW171G044836.1/OM…	57
GO:0009107	lipoate biosynthetic process	57/190905	67/383722	1.59004e-09	1.27689e-08	5.19658e-09	OMIW190G03988.1/OMEM6G021965.1/OMEM6G04575.1/OGRW100G039391.1/OGRW100G09794.1/OGRW100G03868.1/OGRW100G042718.1/OLAW128G044137.1/OLAW128G09707.1/OLAW128G03769.1/OLAW128G040492.1/OMAW171G03989.1/OMAW171G044488.1/OMAW171G041060.1/OMAW171G09878.1/OALW18G039488.1/OALW18G09989.1/OALW18G03940.1/OALW18G042935.1/OMIW190G044849.1/OMIW190G041340.1/OMIW190G09966.1/OAUW26G023091.1/OAUW26G04329.1/OOFW323G02279…	57
GO:0016992	lipoate synthase activity	57/190905	67/383722	1.59004e-09	1.27689e-08	5.19658e-09	OMIW190G03988.1/OMEM6G021965.1/OMEM6G04575.1/OGRW100G039391.1/OGRW100G09794.1/OGRW100G03868.1/OGRW100G042718.1/OLAW128G044137.1/OLAW128G09707.1/OLAW128G03769.1/OLAW128G040492.1/OMAW171G03989.1/OMAW171G044488.1/OMAW171G041060.1/OMAW171G09878.1/OALW18G039488.1/OALW18G09989.1/OALW18G03940.1/OALW18G042935.1/OMIW190G044849.1/OMIW190G041340.1/OMIW190G09966.1/OAUW26G023091.1/OAUW26G04329.1/OOFW323G02279…	57
GO:0019887	protein kinase regulator activity	57/190905	67/383722	1.59004e-09	1.27689e-08	5.19658e-09	OMEM6G011834.1/OGRW100G024906.1/OGRW100G028584.1/OLAW128G029677.1/OLAW128G024604.1/OMAW171G029891.1/OMAW171G024864.1/OALW18G025401.1/OALW18G029234.1/OMIW190G025022.1/OMIW190G030104.1/OAUW26G015304.1/OOFW323G015438.1/OPUW363G024661.1/OPUW363G029540.1/ORHW375G014909.1/OBRW59G013477.1/OEIW71G015236.1/OGLW97G0014904.1/OMEM6G027887.1/OGRW100G052856.1/OGRW100G056392.1/OLAW128G053550.1/OLAW128G056629.1/…	57
GO:0005249	voltage-gated potassium channel activity	219/190905	332/383722	1.77835e-09	1.42191e-08	5.78676e-09	OMEM6G04158.1/OGRW100G032753.1/OGRW100G09346.1/OGRW100G029836.1/OGRW100G03446.1/OLAW128G031011.1/OLAW128G09263.1/OLAW128G03351.1/OLAW128G034788.1/OMAW171G034731.1/OMAW171G03544.1/OMAW171G031143.1/OMAW171G09423.1/OALW18G09535.1/OALW18G033685.1/OALW18G03516.1/OMIW190G035188.1/OMIW190G03555.1/OMIW190G031423.1/OMIW190G09500.1/OAUW26G016549.1/OAUW26G03866.1/OOFW323G016477.1/OOFW323G04073.1/OPUW363G034…	219
GO:0046034	ATP metabolic process	217/190905	329/383722	2.12797e-09	1.69409e-08	6.89445e-09	OMEM6G013987.1/OMEM6G015726.1/OMEM6G015729.1/OMEM6G015744.1/OMEM6G015775.1/OMEM6G020212.1/OMEM6G024463.1/OMEM6G024670.1/OMEM6G031381.1/OMEM6G031384.1/OMEM6G032288.1/OMEM6G035089.1/OMEM6G040755.1/OMEM6G08311.1/OMEM6G08320.1/OMEM6G08335.1/OMEM6G08355.1/OMEM6G09092.1/OGRW100G012921.1/OGRW100G022681.1/OGRW100G059064.1/OGRW100G071141.1/OGRW100G030007.1/OGRW100G048968.1/OGRW100G068783.1/OLAW128G012422.…	217
GO:0009734	auxin-activated signaling pathway	96/190905	127/383722	2.26207e-09	1.79308e-08	7.29732e-09	OMEM6G033664.1/OGRW100G064687.1/OGRW100G067061.1/OLAW128G067220.1/OLAW128G064718.1/OMAW171G066206.1/OMAW171G068599.1/OALW18G067665.1/OALW18G065105.1/OMIW190G069069.1/OMIW190G066355.1/OAUW26G034973.1/OAUW26G039033.1/OOFW323G034809.1/OPUW363G068512.1/OPUW363G065864.1/ORHW375G035158.1/OBRW59G030123.1/OEIW71G035455.1/OGLW97G0035686.1/OMEM6G09920.1/OGRW100G015185.1/OGRW100G020033.1/OLAW128G015433.1/OL…	96
GO:0017025	TBP-class protein binding	119/190905	164/383722	2.27477e-09	1.79541e-08	7.30681e-09	OMEM6G013721.1/OMEM6G022275.1/OGRW100G021867.1/OGRW100G039690.1/OGRW100G06387.1/OGRW100G042990.1/OLAW128G026540.1/OLAW128G044439.1/OLAW128G021718.1/OLAW128G040780.1/OMAW171G026893.1/OMAW171G044769.1/OMAW171G021813.1/OMAW171G041384.1/OALW18G039816.1/OALW18G06539.1/OALW18G043232.1/OALW18G043233.1/OALW18G043234.1/OALW18G043235.1/OALW18G043236.1/OALW18G043237.1/OALW18G043238.1/OALW18G043239.1/OALW18G…	119
GO:0005337	nucleoside transmembrane transporter activity	54/190905	63/383722	2.42788e-09	1.89994e-08	7.73223e-09	OMAW171G059545.1/OMIW190G062814.1/ORHW375G031593.1/OMEM6G028340.1/OMEM6G028341.1/OGRW100G053295.1/OGRW100G053296.1/OGRW100G056757.1/OLAW128G054027.1/OLAW128G057020.1/OLAW128G057021.1/OMAW171G057736.1/OMAW171G057737.1/OMAW171G054282.1/OMAW171G054283.1/OALW18G053631.1/OALW18G053632.1/OALW18G057131.1/OMIW190G054657.1/OMIW190G054658.1/OMIW190G057916.1/OAUW26G029686.1/OAUW26G029687.1/OOFW323G029444.1/…	54
GO:1901642	nucleoside transmembrane transport	54/190905	63/383722	2.42788e-09	1.89994e-08	7.73223e-09	OMAW171G059545.1/OMIW190G062814.1/ORHW375G031593.1/OMEM6G028340.1/OMEM6G028341.1/OGRW100G053295.1/OGRW100G053296.1/OGRW100G056757.1/OLAW128G054027.1/OLAW128G057020.1/OLAW128G057021.1/OMAW171G057736.1/OMAW171G057737.1/OMAW171G054282.1/OMAW171G054283.1/OALW18G053631.1/OALW18G053632.1/OALW18G057131.1/OMIW190G054657.1/OMIW190G054658.1/OMIW190G057916.1/OAUW26G029686.1/OAUW26G029687.1/OOFW323G029444.1/…	54
GO:0051743	red chlorophyll catabolite reductase activity	49/190905	56/383722	3.01011e-09	2.34559e-08	9.54589e-09	OMEM6G02954.1/OMEM6G035685.1/OMEM6G038432.1/OGRW100G071153.1/OGRW100G071154.1/OGRW100G071155.1/OGRW100G068953.1/OGRW100G068954.1/OLAW128G069490.1/OLAW128G069491.1/OLAW128G069492.1/OLAW128G069493.1/OLAW128G071793.1/OLAW128G071794.1/OMAW171G073332.1/OMAW171G073337.1/OMAW171G073338.1/OMAW171G070824.1/OMAW171G070825.1/OALW18G069801.1/OALW18G069803.1/OALW18G069805.1/OALW18G072164.1/OALW18G072165.1/OMI…	49
GO:0015976	carbon utilization	44/190905	49/383722	3.116e-09	2.41786e-08	9.84001e-09	OMEM6G03597.1/OGRW100G08747.1/OGRW100G02902.1/OLAW128G08647.1/OLAW128G02782.1/OLAW128G02784.1/OMAW171G02973.1/OMAW171G02974.1/OMAW171G09111.1/OALW18G08965.1/OALW18G02938.1/OALW18G02939.1/OMIW190G02975.1/OMIW190G02977.1/OMIW190G09170.1/OAUW26G03205.1/OAUW26G03208.1/OOFW323G03490.1/OPUW363G08801.1/OPUW363G08802.1/OPUW363G03100.1/ORHW375G03167.1/OBRW59G03230.1/OEIW71G03440.1/OGLW97G003471.1/OMEM6G03…	44
GO:0000154	rRNA modification	62/190905	75/383722	3.26722e-09	2.51398e-08	1.02312e-08	OMEM6G06555.1/OGRW100G011788.1/OGRW100G016291.1/OLAW128G011865.1/OLAW128G016621.1/OMAW171G016464.1/OMAW171G011813.1/OALW18G016994.1/OALW18G012210.1/OMIW190G011858.1/OMIW190G016675.1/OAUW26G06417.1/OOFW323G07160.1/OPUW363G011719.1/OPUW363G016390.1/ORHW375G06143.1/OBRW59G06050.1/OEIW71G06333.1/OGLW97G006426.1/OMEM6G027984.1/OGRW100G022837.1/OGRW100G052970.1/OGRW100G041862.1/OGRW100G056474.1/OLAW128…	62
GO:0000179	rRNA (adenine-N6,N6-)-dimethyltransFtrase activity	62/190905	75/383722	3.26722e-09	2.51398e-08	1.02312e-08	OMEM6G06555.1/OGRW100G011788.1/OGRW100G016291.1/OLAW128G011865.1/OLAW128G016621.1/OMAW171G016464.1/OMAW171G011813.1/OALW18G016994.1/OALW18G012210.1/OMIW190G011858.1/OMIW190G016675.1/OAUW26G06417.1/OOFW323G07160.1/OPUW363G011719.1/OPUW363G016390.1/ORHW375G06143.1/OBRW59G06050.1/OEIW71G06333.1/OGLW97G006426.1/OMEM6G027984.1/OGRW100G022837.1/OGRW100G052970.1/OGRW100G041862.1/OGRW100G056474.1/OLAW128…	62
GO:0016891	endoribonuclease activity, producing 5'-phosphomonoesters	95/190905	126/383722	3.45325e-09	2.64605e-08	1.07687e-08	OMEM6G05718.1/OGRW100G010917.1/OGRW100G04922.1/OLAW128G010881.1/OLAW128G04849.1/OMAW171G05131.1/OMAW171G011010.1/OALW18G011129.1/OALW18G05018.1/OMIW190G05127.1/OMIW190G011127.1/OAUW26G05472.1/OOFW323G05609.1/OPUW363G010928.1/OPUW363G05242.1/ORHW375G05328.1/OBRW59G05069.1/OEIW71G05554.1/OGLW97G005632.1/OMEM6G01304.1/OGRW100G01136.1/OLAW128G06636.1/OLAW128G01014.1/OMAW171G01048.1/OMAW171G06973.1/OA…	95
GO:0000506	glycosylphosphatidylinositol-N-acetylglucosaminyltransFtrase (GPI-GnT) complex	51/190905	59/383722	3.63562e-09	2.77424e-08	1.12904e-08	OMEM6G019693.1/OGRW100G037068.1/OGRW100G047239.1/OGRW100G040680.1/OLAW128G041930.1/OLAW128G06067.1/OLAW128G038504.1/OLAW128G0499.1/OMAW171G042384.1/OMAW171G0544.1/OMAW171G038974.1/OMAW171G06438.1/OALW18G037260.1/OALW18G050778.1/OALW18G040836.1/OMIW190G042498.1/OMIW190G0534.1/OMIW190G039286.1/OMIW190G06391.1/OAUW26G020772.1/OAUW26G0570.1/OOFW323G01021.1/OOFW323G020691.1/OPUW363G038537.1/OPUW363G04…	51
GO:0005047	signal recognition particle binding	41/190905	45/383722	3.86877e-09	2.93995e-08	1.19648e-08	OMEM6G031596.1/OGRW100G059976.1/OGRW100G062644.1/OLAW128G062783.1/OLAW128G059861.1/OMAW171G063970.1/OMAW171G061003.1/OALW18G060462.1/OALW18G063123.1/OMIW190G061311.1/OMIW190G064315.1/OAUW26G020277.1/OAUW26G032946.1/OAUW26G06944.1/OOFW323G033000.1/OPUW363G063721.1/OPUW363G060784.1/ORHW375G033068.1/OBRW59G010142.1/OBRW59G028289.1/OEIW71G033241.1/OGLW97G0033403.1/OMEM6G030734.1/OGRW100G059125.1/OGRW…	41
GO:0004449	isocitrate dehydrogenase (NAD+) activity	53/190905	62/383722	4.19758e-09	3.17505e-08	1.29216e-08	OMEM6G017413.1/OGRW100G014259.1/OGRW100G034697.1/OGRW100G019038.1/OGRW100G031411.1/OLAW128G032825.1/OLAW128G019023.1/OLAW128G036279.1/OMAW171G019045.1/OMAW171G036567.1/OMAW171G014266.1/OMAW171G032823.1/OALW18G019483.1/OALW18G031681.1/OALW18G014651.1/OALW18G035358.1/OMIW190G014416.1/OMIW190G036928.1/OMIW190G019201.1/OMIW190G033223.1/OAUW26G018397.1/OOFW323G018230.1/OOFW323G09717.1/OPUW363G014439.1…	53
GO:0003984	acetolactate synthase activity	46/190905	52/383722	4.21268e-09	3.17505e-08	1.29216e-08	OMEM6G016768.1/OMEM6G08685.1/OGRW100G013692.1/OGRW100G033971.1/OGRW100G033974.1/OGRW100G018453.1/OGRW100G030740.1/OLAW128G013821.1/OLAW128G032096.1/OLAW128G032101.1/OLAW128G018420.1/OLAW128G035586.1/OMAW171G035808.1/OMAW171G035824.1/OMAW171G013725.1/OMAW171G013727.1/OMAW171G032106.1/OALW18G018892.1/OALW18G030917.1/OALW18G030920.1/OALW18G014078.1/OMIW190G036204.1/OMIW190G036224.1/OMIW190G018584.1/…	46
GO:0008897	holo-[acyl-carrier-protein] synthase activity	55/190905	65/383722	4.67067e-09	3.50586e-08	1.42679e-08	OALW18G081474.1/OMEM6G037378.1/OGRW100G072897.1/OGRW100G075438.1/OGRW100G080120.1/OLAW128G075796.1/OLAW128G080888.1/OLAW128G078655.1/OMAW171G077841.1/OMAW171G080650.1/OMAW171G074996.1/OMAW171G083135.1/OALW18G073836.1/OALW18G079041.1/OALW18G076528.1/OMIW190G078288.1/OMIW190G083650.1/OMIW190G075360.1/OMIW190G080996.1/OAUW26G022167.1/OAUW26G038848.1/OAUW26G041191.1/OOFW323G038852.1/OOFW323G041961.1/…	55
GO:0046854	phosphatidylinositol phosphorylation	128/190905	180/383722	4.70307e-09	3.51583e-08	1.43085e-08	OMEM6G040295.1/OGRW100G078499.1/OGRW100G080433.1/OGRW100G080434.1/OLAW128G081273.1/OLAW128G081274.1/OLAW128G078965.1/OLAW128G078966.1/OMAW171G081001.1/OMAW171G081002.1/OMAW171G083504.1/OALW18G079801.1/OALW18G079802.1/OALW18G081802.1/OALW18G081803.1/OMIW190G084008.1/OMIW190G084009.1/OMIW190G081357.1/OAUW26G041561.1/OAUW26G041562.1/OOFW323G042369.1/OPUW363G080836.1/OPUW363G080837.1/OPUW363G083446.1…	128
GO:0000776	kinetochore	57/190905	68/383722	5.03986e-09	3.75235e-08	1.5271e-08	OMEM6G016383.1/OGRW100G033555.1/OGRW100G030330.1/OLAW128G031662.1/OLAW128G035246.1/OMAW171G035355.1/OMAW171G031682.1/OALW18G030457.1/OALW18G034248.1/OMIW190G035763.1/OMIW190G031997.1/OAUW26G017175.1/OOFW323G017051.1/OPUW363G035100.1/OPUW363G031365.1/ORHW375G016957.1/OBRW59G015187.1/OEIW71G017187.1/OGLW97G0016976.1/OMEM6G029910.1/OGRW100G058269.1/OGRW100G061116.1/OLAW128G061026.1/OLAW128G058457.1/…	57
GO:0004150	dihydroneopterin aldolase activity	48/190905	55/383722	5.31109e-09	3.92253e-08	1.59636e-08	OMEM6G032207.1/OGRW100G043818.1/OGRW100G060584.1/OGRW100G063224.1/OLAW128G045361.1/OLAW128G063434.1/OLAW128G060405.1/OMAW171G045620.1/OMAW171G064612.1/OMAW171G061626.1/OALW18G047312.1/OALW18G061112.1/OALW18G063732.1/OMIW190G045945.1/OMIW190G061945.1/OMIW190G049438.1/OMIW190G064944.1/OAUW26G033536.1/OOFW323G024094.1/OPUW363G048791.1/OPUW363G064348.1/OPUW363G045377.1/OPUW363G061407.1/ORHW375G024136…	48
GO:0006760	folic acid-containing compound metabolic process	48/190905	55/383722	5.31109e-09	3.92253e-08	1.59636e-08	OMEM6G032207.1/OGRW100G043818.1/OGRW100G060584.1/OGRW100G063224.1/OLAW128G045361.1/OLAW128G063434.1/OLAW128G060405.1/OMAW171G045620.1/OMAW171G064612.1/OMAW171G061626.1/OALW18G047312.1/OALW18G061112.1/OALW18G063732.1/OMIW190G045945.1/OMIW190G061945.1/OMIW190G049438.1/OMIW190G064944.1/OAUW26G033536.1/OOFW323G024094.1/OPUW363G048791.1/OPUW363G064348.1/OPUW363G045377.1/OPUW363G061407.1/ORHW375G024136…	48
GO:0003885	D-arabinono-1,4-lactone oxidase activity	112/190905	154/383722	5.3438e-09	3.9309e-08	1.59977e-08	OMEM6G037432.1/OMEM6G040005.1/OGRW100G077858.1/OGRW100G075496.1/OGRW100G080193.1/OLAW128G075832.1/OLAW128G080967.1/OLAW128G073439.1/OMAW171G077904.1/OMAW171G080703.1/OMAW171G075056.1/OMAW171G083194.1/OALW18G079109.1/OALW18G076587.1/OALW18G081534.1/OMIW190G078355.1/OMIW190G083707.1/OMIW190G075424.1/OMIW190G081056.1/OAUW26G038903.1/OAUW26G041246.1/OOFW323G038914.1/OOFW323G042023.1/OPUW363G074884.1/…	112
GO:0018024	histone-lysine N-methyltransFtrase activity	304/190905	485/383722	6.67857e-09	4.89318e-08	1.99139e-08	OMEM6G031067.1/OGRW100G059521.1/OGRW100G062157.1/OLAW128G059368.1/OMAW171G063451.1/OMAW171G060492.1/OALW18G059957.1/OALW18G062626.1/OMIW190G060776.1/OPUW363G063188.1/OPUW363G060251.1/OBRW59G027870.1/OGLW97G0032836.1/OMEM6G037352.1/OMEM6G039916.1/OGRW100G072865.1/OGRW100G077731.1/OGRW100G075412.1/OGRW100G080090.1/OLAW128G075720.1/OLAW128G080840.1/OLAW128G073358.1/OLAW128G078623.1/OMAW171G077799.1/…	304
GO:0003830	beta-1,4-mannosylglycoprotein 4-beta-N-acetylglucosaminyltransFtrase activity	74/190905	94/383722	6.99391e-09	5.10389e-08	2.07714e-08	OMEM6G017410.1/OGRW100G014251.1/OGRW100G034692.1/OGRW100G019024.1/OGRW100G019025.1/OGRW100G031406.1/OLAW128G014414.1/OLAW128G032821.1/OLAW128G019008.1/OLAW128G019009.1/OLAW128G036274.1/OMAW171G019034.1/OMAW171G019037.1/OMAW171G036557.1/OMAW171G014259.1/OMAW171G014261.1/OMAW171G032819.1/OALW18G019473.1/OALW18G019474.1/OALW18G019477.1/OALW18G031676.1/OALW18G014636.1/OALW18G014637.1/OALW18G035353.1/…	74
GO:0006515	protein quality control for misfolded or incompletely synthesized proteins	52/190905	61/383722	7.2387e-09	5.26165e-08	2.14134e-08	OMEM6G014609.1/OMEM6G029357.1/OGRW100G022778.1/OGRW100G026666.1/OGRW100G032612.1/OGRW100G057710.1/OLAW128G027480.1/OLAW128G055058.1/OLAW128G022632.1/OLAW128G057981.1/OMAW171G058751.1/OMAW171G055374.1/OALW18G023151.1/OALW18G027235.1/OALW18G036601.1/OALW18G058115.1/OMIW190G022940.1/OMIW190G055705.1/OMIW190G058991.1/OAUW26G012962.1/OAUW26G030713.1/OOFW323G013400.1/OOFW323G030621.1/OPUW363G022634.1/O…	52
GO:0004764	shikimate 3-dehydrogenase (NADP+) activity	45/190905	51/383722	7.51356e-09	5.43994e-08	2.2139e-08	OMEM6G02550.1/OGRW100G07716.1/OGRW100G07721.1/OGRW100G01962.1/OLAW128G07594.1/OLAW128G07600.1/OLAW128G01834.1/OMAW171G01998.1/OMAW171G07888.1/OALW18G07927.1/OALW18G07931.1/OALW18G01989.1/OMIW190G01986.1/OMIW190G07879.1/OAUW26G02204.1/OAUW26G02207.1/OOFW323G02510.1/OPUW363G07840.1/OPUW363G02113.1/OPUW363G02116.1/ORHW375G02206.1/OBRW59G02325.1/OEIW71G02444.1/OGLW97G002350.1/OGLW97G002351.1/OMEM6G04…	45
GO:0008428	ribonuclease inhibitor activity	54/190905	64/383722	7.97405e-09	5.72823e-08	2.33123e-08	OMEM6G010264.1/OMEM6G010268.1/OGRW100G015522.1/OGRW100G09396.1/OGRW100G020394.1/OGRW100G020397.1/OGRW100G03481.1/OLAW128G015788.1/OLAW128G015789.1/OLAW128G020287.1/OMAW171G016702.1/OMAW171G020381.1/OMAW171G073437.1/OMAW171G015627.1/OMAW171G015629.1/OALW18G020833.1/OALW18G09583.1/OALW18G016031.1/OALW18G016036.1/OALW18G03547.1/OMIW190G012092.1/OMIW190G015741.1/OMIW190G073769.1/OMIW190G020570.1/OMIW…	54
GO:0051252	regulation of RNA metabolic process	54/190905	64/383722	7.97405e-09	5.72823e-08	2.33123e-08	OMEM6G010264.1/OMEM6G010268.1/OGRW100G015522.1/OGRW100G09396.1/OGRW100G020394.1/OGRW100G020397.1/OGRW100G03481.1/OLAW128G015788.1/OLAW128G015789.1/OLAW128G020287.1/OMAW171G016702.1/OMAW171G020381.1/OMAW171G073437.1/OMAW171G015627.1/OMAW171G015629.1/OALW18G020833.1/OALW18G09583.1/OALW18G016031.1/OALW18G016036.1/OALW18G03547.1/OMIW190G012092.1/OMIW190G015741.1/OMIW190G073769.1/OMIW190G020570.1/OMIW…	54
GO:0004149	dihydrolipoyllysine-residue succinyltransFtrase activity	37/190905	40/383722	8.19294e-09	5.83903e-08	2.37632e-08	OMEM6G016789.1/OMEM6G08716.1/OGRW100G013721.1/OGRW100G034007.1/OGRW100G018488.1/OGRW100G030765.1/OLAW128G013848.1/OLAW128G032139.1/OLAW128G035613.1/OMAW171G018432.1/OMAW171G035876.1/OMAW171G032129.1/OALW18G018918.1/OALW18G030950.1/OALW18G014104.1/OALW18G034679.1/OMIW190G013845.1/OMIW190G036242.1/OMIW190G018606.1/OMIW190G032492.1/OAUW26G017685.1/OAUW26G08551.1/OOFW323G017559.1/OOFW323G09144.1/OPUW…	37
GO:0045252	oxoglutarate dehydrogenase complex	37/190905	40/383722	8.19294e-09	5.83903e-08	2.37632e-08	OMEM6G016789.1/OMEM6G08716.1/OGRW100G013721.1/OGRW100G034007.1/OGRW100G018488.1/OGRW100G030765.1/OLAW128G013848.1/OLAW128G032139.1/OLAW128G035613.1/OMAW171G018432.1/OMAW171G035876.1/OMAW171G032129.1/OALW18G018918.1/OALW18G030950.1/OALW18G014104.1/OALW18G034679.1/OMIW190G013845.1/OMIW190G036242.1/OMIW190G018606.1/OMIW190G032492.1/OAUW26G017685.1/OAUW26G08551.1/OOFW323G017559.1/OOFW323G09144.1/OPUW…	37
GO:0006888	ER to Golgi vesicle-mediated transport	259/190905	406/383722	8.22354e-09	5.83903e-08	2.37632e-08	OMEM6G017609.1/OGRW100G014396.1/OGRW100G034881.1/OGRW100G019179.1/OGRW100G031601.1/OLAW128G014566.1/OLAW128G033032.1/OLAW128G019170.1/OLAW128G036477.1/OMAW171G019189.1/OMAW171G036758.1/OMAW171G014401.1/OMAW171G033019.1/OALW18G019620.1/OALW18G031881.1/OALW18G014815.1/OALW18G035557.1/OMIW190G014574.1/OMIW190G037114.1/OMIW190G019343.1/OMIW190G034542.1/OAUW26G018608.1/OAUW26G09289.1/OOFW323G018432.1/…	259
GO:0004739	pyruvate dehydrogenase (acetyl-transFtrring) activity	106/190905	145/383722	8.49236e-09	5.9837e-08	2.4352e-08	OMEM6G010079.1/OMEM6G023891.1/OGRW100G015337.1/OGRW100G044481.1/OGRW100G020201.1/OGRW100G048835.1/OLAW128G015598.1/OLAW128G046097.1/OLAW128G020109.1/OLAW128G049493.1/OMAW171G020183.1/OMAW171G046295.1/OMAW171G015416.1/OMAW171G049762.1/OALW18G020587.1/OALW18G048024.1/OALW18G015841.1/OALW18G044766.1/OMIW190G015549.1/OMIW190G020381.1/OMIW190G050130.1/OAUW26G010361.1/OAUW26G024940.1/OOFW323G024802.1/O…	106
GO:0006086	acetyl-CoA biosynthetic process from pyruvate	106/190905	145/383722	8.49236e-09	5.9837e-08	2.4352e-08	OMEM6G010079.1/OMEM6G023891.1/OGRW100G015337.1/OGRW100G044481.1/OGRW100G020201.1/OGRW100G048835.1/OLAW128G015598.1/OLAW128G046097.1/OLAW128G020109.1/OLAW128G049493.1/OMAW171G020183.1/OMAW171G046295.1/OMAW171G015416.1/OMAW171G049762.1/OALW18G020587.1/OALW18G048024.1/OALW18G015841.1/OALW18G044766.1/OMIW190G015549.1/OMIW190G020381.1/OMIW190G050130.1/OAUW26G010361.1/OAUW26G024940.1/OOFW323G024802.1/O…	106
GO:0009738	abscisic acid-activated signaling pathway	86/190905	113/383722	8.63347e-09	6.0599e-08	2.46621e-08	OMEM6G041426.1/OMEM6G041430.1/OMEM6G041433.1/OMEM6G041436.1/OMEM6G041437.1/OMEM6G041438.1/OGRW100G081530.1/OGRW100G081536.1/OLAW128G082512.1/OLAW128G082515.1/OLAW128G080156.1/OMAW171G082197.1/OMAW171G084634.1/OMAW171G084636.1/OALW18G080612.1/OALW18G082984.1/OALW18G082987.1/OALW18G082990.1/OMIW190G082747.1/OMIW190G082749.1/OAUW26G042843.1/OOFW323G043542.1/OOFW323G043544.1/OPUW363G084643.1/OPUW363G…	86
GO:0043622	cortical microtubule organization	89/190905	118/383722	1.03564e-08	7.24158e-08	2.94712e-08	OMEM6G039284.1/OGRW100G074860.1/OGRW100G077143.1/OGRW100G081248.1/OLAW128G077950.1/OLAW128G075156.1/OLAW128G079857.1/OMAW171G079976.1/OMAW171G081927.1/OMAW171G077068.1/OMAW171G084369.1/OALW18G075924.1/OALW18G078381.1/OALW18G082679.1/OMIW190G080380.1/OMIW190G084973.1/OMIW190G077546.1/OMIW190G082303.1/OAUW26G040600.1/OOFW323G041085.1/OOFW323G043282.1/OPUW363G076896.1/OPUW363G081866.1/OPUW363G079754…	89
GO:0031011	Ino80 complex	155/190905	227/383722	1.2127e-08	8.44756e-08	3.43792e-08	OMEM6G027376.1/OMEM6G027502.1/OGRW100G053482.1/OGRW100G056960.1/OLAW128G054220.1/OLAW128G057219.1/OMAW171G045878.1/OMAW171G054493.1/OALW18G053826.1/OALW18G057341.1/OMIW190G046200.1/OMIW190G058119.1/OAUW26G029931.1/OOFW323G029647.1/OPUW363G049027.1/OPUW363G054289.1/ORHW375G029780.1/OBRW59G025712.1/OBRW59G029847.1/OEIW71G029959.1/OGLW97G0024331.1/OMEM6G012578.1/OMEM6G012582.1/OGRW100G025680.1/OGRW1…	155
GO:0004349	glutamate 5-kinase activity	39/190905	43/383722	1.30126e-08	8.86304e-08	3.60701e-08	OMEM6G021523.1/OGRW100G038939.1/OGRW100G042298.1/OLAW128G043664.1/OLAW128G040069.1/OMAW171G044030.1/OMAW171G040631.1/OALW18G039042.1/OALW18G042486.1/OMIW190G044388.1/OMIW190G040890.1/OAUW26G022624.1/OOFW323G022358.1/OPUW363G040258.1/OPUW363G043692.1/ORHW375G022378.1/OBRW59G019702.1/OBRW59G019703.1/OEIW71G022538.1/OGLW97G0022201.1/OMEM6G05185.1/OGRW100G010408.1/OGRW100G04438.1/OLAW128G010370.1/OLA…	39
GO:0004350	glutamate-5-semialdehyde dehydrogenase activity	39/190905	43/383722	1.30126e-08	8.86304e-08	3.60701e-08	OMEM6G021523.1/OGRW100G038939.1/OGRW100G042298.1/OLAW128G043664.1/OLAW128G040069.1/OMAW171G044030.1/OMAW171G040631.1/OALW18G039042.1/OALW18G042486.1/OMIW190G044388.1/OMIW190G040890.1/OAUW26G022624.1/OOFW323G022358.1/OPUW363G040258.1/OPUW363G043692.1/ORHW375G022378.1/OBRW59G019702.1/OBRW59G019703.1/OEIW71G022538.1/OGLW97G0022201.1/OMEM6G05185.1/OGRW100G010408.1/OGRW100G04438.1/OLAW128G010370.1/OLA…	39
GO:0004609	phosphatidylserine decarboxylase activity	39/190905	43/383722	1.30126e-08	8.86304e-08	3.60701e-08	OMEM6G012978.1/OGRW100G021078.1/OGRW100G0121.1/OLAW128G025709.1/OLAW128G020925.1/OMAW171G026092.1/OMAW171G021023.1/OALW18G021404.1/OALW18G05690.1/OALW18G074.1/OMIW190G021246.1/OMIW190G026185.1/OAUW26G011211.1/OOFW323G011718.1/OPUW363G020891.1/OPUW363G025843.1/ORHW375G010855.1/OBRW59G010127.1/OEIW71G010996.1/OGLW97G0010754.1/OMEM6G06107.1/OGRW100G011337.1/OGRW100G05316.1/OLAW128G011303.1/OLAW128G0…	39
GO:0008290	F-actin capping protein complex	39/190905	43/383722	1.30126e-08	8.86304e-08	3.60701e-08	OMEM6G027401.1/OMEM6G029220.1/OGRW100G052410.1/OGRW100G056004.1/OLAW128G053073.1/OLAW128G056160.1/OMAW171G056837.1/OMAW171G053402.1/OALW18G052765.1/OALW18G056364.1/OMIW190G053824.1/OMIW190G057079.1/OAUW26G028810.1/OOFW323G028596.1/OPUW363G056575.1/OPUW363G053263.1/ORHW375G028727.1/OBRW59G024816.1/OEIW71G028874.1/OGLW97G0029006.1/OMEM6G015155.1/OGRW100G023292.1/OGRW100G027176.1/OLAW128G028062.1/OL…	39
GO:0008320	protein transmembrane transporter activity	39/190905	43/383722	1.30126e-08	8.86304e-08	3.60701e-08	OMEM6G02074.1/OGRW100G046351.1/OGRW100G01457.1/OLAW128G06986.1/OLAW128G01323.1/OMAW171G01402.1/OMAW171G07305.1/OALW18G049869.1/OALW18G01469.1/OMIW190G01380.1/OMIW190G07280.1/OAUW26G01511.1/OOFW323G01904.1/OPUW363G07241.1/OPUW363G01459.1/ORHW375G01561.1/OBRW59G01794.1/OEIW71G01794.1/OGLW97G001675.1/OMEM6G014743.1/OGRW100G022886.1/OGRW100G026775.1/OLAW128G027602.1/OLAW128G022743.1/OMAW171G027979.1/…	39
GO:0051016	barbed-end actin filament capping	39/190905	43/383722	1.30126e-08	8.86304e-08	3.60701e-08	OMEM6G027401.1/OMEM6G029220.1/OGRW100G052410.1/OGRW100G056004.1/OLAW128G053073.1/OLAW128G056160.1/OMAW171G056837.1/OMAW171G053402.1/OALW18G052765.1/OALW18G056364.1/OMIW190G053824.1/OMIW190G057079.1/OAUW26G028810.1/OOFW323G028596.1/OPUW363G056575.1/OPUW363G053263.1/ORHW375G028727.1/OBRW59G024816.1/OEIW71G028874.1/OGLW97G0029006.1/OMEM6G015155.1/OGRW100G023292.1/OGRW100G027176.1/OLAW128G028062.1/OL…	39
GO:0006862	nucleotide transport	65/190905	81/383722	1.41611e-08	9.60972e-08	3.91088e-08	OMEM6G039773.1/OGRW100G072721.1/OGRW100G077595.1/OGRW100G075300.1/OLAW128G075597.1/OLAW128G080697.1/OLAW128G073254.1/OMAW171G077668.1/OMAW171G080476.1/OMAW171G074813.1/OALW18G073638.1/OALW18G078852.1/OALW18G076382.1/OMIW190G078122.1/OMIW190G083478.1/OMIW190G075183.1/OMIW190G080802.1/OAUW26G038703.1/OOFW323G038523.1/OOFW323G038664.1/OOFW323G041755.1/OPUW363G080340.1/OPUW363G077375.1/OBRW59G033418.…	65
GO:0004807	triose-phosphate isomerase activity	57/190905	69/383722	1.48643e-08	1.00498e-07	4.08997e-08	OMEM6G01295.1/OMEM6G05139.1/OMEM6G0833.1/OGRW100G010353.1/OGRW100G047403.1/OGRW100G04395.1/OGRW100G0485.1/OLAW128G010318.1/OLAW128G05909.1/OLAW128G0375.1/OLAW128G04323.1/OMAW171G0372.1/OMAW171G04574.1/OMAW171G010462.1/OMAW171G06251.1/OALW18G010572.1/OALW18G050940.1/OALW18G0430.1/OALW18G04482.1/OMIW190G0365.1/OMIW190G04565.1/OMIW190G010571.1/OMIW190G06207.1/OAUW26G0438.1/OAUW26G04897.1/OOFW323G050…	57
GO:0019478	D-amino acid catabolic process	36/190905	39/383722	1.5267e-08	1.02843e-07	4.18541e-08	OMEM6G030852.1/OMEM6G032732.1/OGRW100G059229.1/OGRW100G061952.1/OGRW100G066123.1/OLAW128G061653.1/OLAW128G066123.1/OLAW128G059171.1/OLAW128G063793.1/OMAW171G063151.1/OMAW171G065058.1/OMAW171G060204.1/OMAW171G067565.1/OALW18G059690.1/OALW18G066617.1/OALW18G062381.1/OALW18G064135.1/OMIW190G060502.1/OMIW190G067948.1/OMIW190G063477.1/OMIW190G065328.1/OAUW26G032137.1/OAUW26G033945.1/OOFW323G032139.1/O…	36
GO:0009686	gibberellin biosynthetic process	41/190905	46/383722	1.83477e-08	1.2181e-07	4.95733e-08	OMEM6G025037.1/OMEM6G025151.1/OMEM6G025152.1/OMEM6G025155.1/OMEM6G025156.1/OGRW100G045680.1/OGRW100G049875.1/OGRW100G049876.1/OGRW100G049877.1/OLAW128G047267.1/OLAW128G050540.1/OLAW128G050541.1/OLAW128G050542.1/OMAW171G047503.1/OMAW171G047504.1/OMAW171G047505.1/OMAW171G050880.1/OALW18G049174.1/OALW18G049176.1/OALW18G045782.1/OALW18G045783.1/OMIW190G047852.1/OMIW190G047854.1/OMIW190G051277.1/OMIW1…	41
GO:0010241	ent-kaurene oxidation to kaurenoic acid	41/190905	46/383722	1.83477e-08	1.2181e-07	4.95733e-08	OMEM6G025037.1/OMEM6G025151.1/OMEM6G025152.1/OMEM6G025155.1/OMEM6G025156.1/OGRW100G045680.1/OGRW100G049875.1/OGRW100G049876.1/OGRW100G049877.1/OLAW128G047267.1/OLAW128G050540.1/OLAW128G050541.1/OLAW128G050542.1/OMAW171G047503.1/OMAW171G047504.1/OMAW171G047505.1/OMAW171G050880.1/OALW18G049174.1/OALW18G049176.1/OALW18G045782.1/OALW18G045783.1/OMIW190G047852.1/OMIW190G047854.1/OMIW190G051277.1/OMIW1…	41
GO:0016471	vacuolar proton-transporting V-type ATPase complex	41/190905	46/383722	1.83477e-08	1.2181e-07	4.95733e-08	OMEM6G018386.1/OMEM6G09778.1/OGRW100G015052.1/OGRW100G035657.1/OGRW100G019854.1/OGRW100G032322.1/OLAW128G015265.1/OLAW128G033845.1/OLAW128G019642.1/OLAW128G037231.1/OMAW171G019850.1/OMAW171G037554.1/OMAW171G078977.1/OMAW171G015095.1/OMAW171G033767.1/OALW18G020278.1/OALW18G032674.1/OALW18G015480.1/OALW18G036299.1/OMIW190G015221.1/OMIW190G037912.1/OMIW190G079400.1/OMIW190G020058.1/OMIW190G033777.1/…	41
GO:0052615	ent-kaurene oxidase activity	41/190905	46/383722	1.83477e-08	1.2181e-07	4.95733e-08	OMEM6G025037.1/OMEM6G025151.1/OMEM6G025152.1/OMEM6G025155.1/OMEM6G025156.1/OGRW100G045680.1/OGRW100G049875.1/OGRW100G049876.1/OGRW100G049877.1/OLAW128G047267.1/OLAW128G050540.1/OLAW128G050541.1/OLAW128G050542.1/OMAW171G047503.1/OMAW171G047504.1/OMAW171G047505.1/OMAW171G050880.1/OALW18G049174.1/OALW18G049176.1/OALW18G045782.1/OALW18G045783.1/OMIW190G047852.1/OMIW190G047854.1/OMIW190G051277.1/OMIW1…	41
GO:0006488	dolichol-linked oligosaccharide biosynthetic process	118/190905	166/383722	1.90484e-08	1.26007e-07	5.12815e-08	OMEM6G04730.1/OGRW100G023586.1/OGRW100G027451.1/OLAW128G028378.1/OLAW128G023374.1/OMAW171G028679.1/OMAW171G046781.1/OMAW171G023574.1/OALW18G024016.1/OALW18G028053.1/OMIW190G023816.1/OMIW190G047103.1/OMIW190G028776.1/OAUW26G013885.1/OOFW323G014217.1/OPUW363G023455.1/OPUW363G028337.1/ORHW375G013536.1/OBRW59G07805.1/OEIW71G013565.1/OGLW97G0012881.1/OGLW97G0013454.1/OMEM6G018178.1/OMEM6G018179.1/OGRW…	118
GO:0003697	single-stranded DNA binding	309/190905	498/383722	2.22787e-08	1.34188e-07	5.46106e-08	OMAW171G079880.1/OLAW128G011187.1/OMIW190G05445.1/ORHW375G05642.1/OMEM6G016619.1/OMEM6G021953.1/OGRW100G012687.1/OGRW100G039379.1/OGRW100G039381.1/OGRW100G030607.1/OGRW100G042706.1/OLAW128G012808.1/OLAW128G044125.1/OLAW128G035460.1/OLAW128G040480.1/OMAW171G035655.1/OMAW171G044477.1/OMAW171G012786.1/OMAW171G031958.1/OMAW171G041046.1/OALW18G017871.1/OALW18G039472.1/OALW18G039474.1/OALW18G034515.1/O…	309
GO:0033926	glycopeptide alpha-N-acetylgalactosaminidase activity	134/190905	193/383722	2.34084e-08	1.34188e-07	5.46106e-08	OMEM6G01175.1/OGRW100G07516.1/OGRW100G01757.1/OLAW128G07314.1/OLAW128G01619.1/OMAW171G01725.1/OMAW171G07642.1/OALW18G07713.1/OALW18G01767.1/OMIW190G01709.1/OMIW190G07616.1/OAUW26G01954.1/OOFW323G02235.1/OPUW363G07579.1/OPUW363G01818.1/ORHW375G01916.1/OBRW59G02087.1/OEIW71G02152.1/OGLW97G002036.1/OMEM6G06586.1/OGRW100G011810.1/OGRW100G016344.1/OLAW128G011890.1/OLAW128G016648.1/OMAW171G016490.1/OMA…	134
GO:0008429	phosphatidylethanolamine binding	43/190905	49/383722	2.37254e-08	1.34188e-07	5.46106e-08	OMEM6G023193.1/OGRW100G043850.1/OGRW100G048218.1/OLAW128G045388.1/OLAW128G048881.1/OMAW171G045647.1/OMAW171G049117.1/OALW18G047346.1/OALW18G044134.1/OMIW190G049474.1/OAUW26G024263.1/OOFW323G024121.1/OPUW363G048813.1/OPUW363G048814.1/OPUW363G045407.1/ORHW375G024165.1/OBRW59G021131.1/OBRW59G021132.1/OEIW71G024243.1/OGLW97G0024046.1/OGLW97G0024047.1/OGLW97G0024048.1/OMEM6G01736.1/OGRW100G046804.1/OG…	43
GO:0048573	photoperiodism, flowering	43/190905	49/383722	2.37254e-08	1.34188e-07	5.46106e-08	OMEM6G023193.1/OGRW100G043850.1/OGRW100G048218.1/OLAW128G045388.1/OLAW128G048881.1/OMAW171G045647.1/OMAW171G049117.1/OALW18G047346.1/OALW18G044134.1/OMIW190G049474.1/OAUW26G024263.1/OOFW323G024121.1/OPUW363G048813.1/OPUW363G048814.1/OPUW363G045407.1/ORHW375G024165.1/OBRW59G021131.1/OBRW59G021132.1/OEIW71G024243.1/OGLW97G0024046.1/OGLW97G0024047.1/OGLW97G0024048.1/OMEM6G01736.1/OGRW100G046804.1/OG…	43
GO:0000234	phosphoethanolamine N-methyltransFtrase activity	38/190905	42/383722	2.37875e-08	1.34188e-07	5.46106e-08	OMEM6G022286.1/OMEM6G03989.1/OGRW100G039695.1/OGRW100G09174.1/OGRW100G03286.1/OGRW100G042994.1/OLAW128G044444.1/OLAW128G09075.1/OLAW128G03181.1/OLAW128G040784.1/OMAW171G03372.1/OMAW171G044773.1/OMAW171G041389.1/OMAW171G08715.1/OALW18G039822.1/OALW18G09360.1/OALW18G03353.1/OALW18G043245.1/OMIW190G03368.1/OMIW190G045125.1/OMIW190G041684.1/OMIW190G08712.1/OAUW26G023384.1/OAUW26G03663.1/OOFW323G02313…	38
GO:0000338	protein deneddylation	38/190905	42/383722	2.37875e-08	1.34188e-07	5.46106e-08	OMEM6G031754.1/OGRW100G060132.1/OGRW100G062777.1/OLAW128G062944.1/OLAW128G059984.1/OMAW171G064138.1/OMAW171G061154.1/OALW18G060601.1/OALW18G063264.1/OMIW190G061481.1/OMIW190G064468.1/OAUW26G033094.1/OOFW323G033148.1/OPUW363G063871.1/OPUW363G060922.1/ORHW375G033222.1/OBRW59G028407.1/OEIW71G033391.1/OGLW97G0033569.1/OMEM6G017001.1/OGRW100G034264.1/OGRW100G031003.1/OLAW128G032404.1/OLAW128G035849.1/…	38
GO:0000469	cleavage involved in rRNA processing	38/190905	42/383722	2.37875e-08	1.34188e-07	5.46106e-08	OMEM6G06474.1/OGRW100G011688.1/OGRW100G016212.1/OLAW128G011768.1/OLAW128G016554.1/OMAW171G016389.1/OMAW171G011716.1/OALW18G016893.1/OALW18G012129.1/OMIW190G011777.1/OMIW190G016589.1/OAUW26G06345.1/OOFW323G07073.1/OPUW363G011631.1/OPUW363G016298.1/ORHW375G06053.1/OBRW59G05967.1/OEIW71G06249.1/OGLW97G006343.1/OMEM6G034320.1/OGRW100G065367.1/OGRW100G067681.1/OLAW128G067865.1/OLAW128G065368.1/OMAW171…	38
GO:0000796	condensin complex	38/190905	42/383722	2.37875e-08	1.34188e-07	5.46106e-08	OMEM6G02928.1/OGRW100G08099.1/OGRW100G02284.1/OLAW128G07974.1/OLAW128G02144.1/OMAW171G02313.1/OMAW171G08167.1/OALW18G08316.1/OALW18G02275.1/OMIW190G02293.1/OMIW190G08157.1/OAUW26G02562.1/OOFW323G02787.1/OPUW363G08151.1/OPUW363G02411.1/ORHW375G02498.1/OBRW59G02658.1/OEIW71G02777.1/OGLW97G002756.1/OMEM6G023934.1/OGRW100G044536.1/OGRW100G048891.1/OLAW128G046150.1/OLAW128G049543.1/OMAW171G046355.1/OM…	38
GO:0002151	G-quadruplex RNA binding	38/190905	42/383722	2.37875e-08	1.34188e-07	5.46106e-08	OMEM6G026744.1/OGRW100G051680.1/OGRW100G055361.1/OLAW128G052343.1/OLAW128G055727.1/OMAW171G056171.1/OMAW171G052778.1/OALW18G052086.1/OALW18G055710.1/OMIW190G053159.1/OMIW190G056442.1/OAUW26G028029.1/OOFW323G027955.1/OPUW363G055924.1/OPUW363G052591.1/ORHW375G028026.1/OBRW59G024231.1/OEIW71G028131.1/OGLW97G0028135.1/OMEM6G012463.1/OGRW100G025574.1/OGRW100G029208.1/OLAW128G030389.1/OLAW128G025215.1/…	38
GO:0003987	acetate-CoA ligase activity	38/190905	42/383722	2.37875e-08	1.34188e-07	5.46106e-08	OMEM6G08784.1/OGRW100G013799.1/OGRW100G018566.1/OLAW128G013923.1/OLAW128G018534.1/OMAW171G018521.1/OMAW171G013802.1/OALW18G018994.1/OALW18G014174.1/OMIW190G013930.1/OMIW190G018693.1/OAUW26G08634.1/OOFW323G09211.1/OPUW363G013641.1/OPUW363G018349.1/ORHW375G08152.1/OBRW59G07806.1/OEIW71G08414.1/OGLW97G008449.1/OMEM6G016857.1/OGRW100G034087.1/OGRW100G030831.1/OLAW128G032219.1/OLAW128G035692.1/OMAW171…	38
GO:0004044	amidophosphoribosyltransFtrase activity	38/190905	42/383722	2.37875e-08	1.34188e-07	5.46106e-08	OMEM6G021387.1/OGRW100G038802.1/OGRW100G042165.1/OLAW128G043516.1/OLAW128G039916.1/OMAW171G043893.1/OMAW171G040478.1/OALW18G038891.1/OALW18G042334.1/OMIW190G044235.1/OMIW190G040742.1/OAUW26G022413.1/OOFW323G022207.1/OPUW363G040107.1/OPUW363G043565.1/ORHW375G022239.1/OBRW59G019578.1/OEIW71G022394.1/OGLW97G0022049.1/OMEM6G05423.1/OGRW100G010624.1/OGRW100G04639.1/OLAW128G010583.1/OLAW128G04569.1/OMA…	38
GO:0004318	enoyl-[acyl-carrier-protein] reductase (NADH) activity	38/190905	42/383722	2.37875e-08	1.34188e-07	5.46106e-08	OMEM6G030777.1/OGRW100G059149.1/OGRW100G061897.1/OLAW128G061737.1/OLAW128G059122.1/OMAW171G063102.1/OMAW171G060146.1/OALW18G059619.1/OALW18G062323.1/OMIW190G060443.1/OMIW190G063404.1/OAUW26G032075.1/OOFW323G032079.1/OPUW363G062864.1/OPUW363G059904.1/ORHW375G032201.1/OBRW59G027607.1/OEIW71G032275.1/OGLW97G0032415.1/OMEM6G032897.1/OGRW100G063831.1/OGRW100G066286.1/OLAW128G066285.1/OLAW128G063936.1/…	38
GO:0004392	heme oxygenase (decyclizing) activity	38/190905	42/383722	2.37875e-08	1.34188e-07	5.46106e-08	OMEM6G015235.1/OGRW100G023380.1/OGRW100G027274.1/OLAW128G028150.1/OLAW128G023218.1/OMAW171G028467.1/OMAW171G023393.1/OALW18G023801.1/OALW18G027882.1/OMIW190G023556.1/OMIW190G028608.1/OAUW26G013637.1/OOFW323G014029.1/OPUW363G023247.1/OPUW363G028146.1/ORHW375G013289.1/OBRW59G012278.1/OEIW71G013361.1/OGLW97G0013254.1/OMEM6G025301.1/OGRW100G045823.1/OGRW100G050069.1/OLAW128G047355.1/OLAW128G050677.1/…	38
GO:0004416	hydroxyacylglutathione hydrolase activity	38/190905	42/383722	2.37875e-08	1.34188e-07	5.46106e-08	OMEM6G014822.1/OGRW100G022970.1/OGRW100G026834.1/OLAW128G027702.1/OLAW128G022807.1/OMAW171G028029.1/OMAW171G022961.1/OALW18G023358.1/OALW18G027416.1/OMIW190G023120.1/OMIW190G028134.1/OAUW26G013176.1/OOFW323G013597.1/OPUW363G022816.1/OPUW363G027719.1/ORHW375G012809.1/OBRW59G011862.1/OEIW71G012919.1/OGLW97G0012729.1/OMEM6G034265.1/OGRW100G065315.1/OGRW100G067627.1/OLAW128G067814.1/OLAW128G065314.1/…	38
GO:0004455	ketol-acid reductoisomerase activity	38/190905	42/383722	2.37875e-08	1.34188e-07	5.46106e-08	OMEM6G022541.1/OMEM6G03678.1/OGRW100G039952.1/OGRW100G08842.1/OGRW100G02979.1/OGRW100G043219.1/OLAW128G044707.1/OLAW128G08739.1/OLAW128G02869.1/OLAW128G041015.1/OMAW171G03057.1/OMAW171G045003.1/OMAW171G041634.1/OMAW171G09039.1/OALW18G040086.1/OALW18G09052.1/OALW18G03025.1/OALW18G043483.1/OMIW190G03065.1/OMIW190G045355.1/OMIW190G041936.1/OMIW190G09080.1/OAUW26G023633.1/OAUW26G03301.1/OOFW323G02337…	38
GO:0004459	L-lactate dehydrogenase activity	38/190905	42/383722	2.37875e-08	1.34188e-07	5.46106e-08	OMEM6G06392.1/OGRW100G011630.1/OGRW100G016162.1/OLAW128G011709.1/OLAW128G016504.1/OMAW171G016331.1/OMAW171G011656.1/OALW18G016833.1/OALW18G012080.1/OMIW190G011732.1/OMIW190G016525.1/OAUW26G06290.1/OOFW323G07002.1/OPUW363G011583.1/OPUW363G016242.1/ORHW375G05996.1/OBRW59G05909.1/OEIW71G06192.1/OGLW97G006275.1/OMEM6G022798.1/OGRW100G043438.1/OGRW100G047804.1/OLAW128G044970.1/OLAW128G048506.1/OMAW171…	38
GO:0004521	endoribonuclease activity	38/190905	42/383722	2.37875e-08	1.34188e-07	5.46106e-08	OMEM6G06474.1/OGRW100G011688.1/OGRW100G016212.1/OLAW128G011768.1/OLAW128G016554.1/OMAW171G016389.1/OMAW171G011716.1/OALW18G016893.1/OALW18G012129.1/OMIW190G011777.1/OMIW190G016589.1/OAUW26G06345.1/OOFW323G07073.1/OPUW363G011631.1/OPUW363G016298.1/ORHW375G06053.1/OBRW59G05967.1/OEIW71G06249.1/OGLW97G006343.1/OMEM6G017907.1/OGRW100G035205.1/OGRW100G031895.1/OLAW128G033363.1/OLAW128G036777.1/OMAW171…	38
GO:0004565	beta-galactosidase activity	38/190905	42/383722	2.37875e-08	1.34188e-07	5.46106e-08	OMEM6G06051.1/OGRW100G011272.1/OGRW100G05254.1/OLAW128G011244.1/OLAW128G05178.1/OMAW171G05483.1/OMAW171G011337.1/OALW18G011495.1/OALW18G05368.1/OMIW190G05498.1/OMIW190G011471.1/OAUW26G05860.1/OOFW323G05976.1/OPUW363G011410.1/OPUW363G05586.1/ORHW375G05698.1/OBRW59G05436.1/OEIW71G05911.1/OGLW97G005943.1/OMEM6G022174.1/OGRW100G039624.1/OGRW100G042935.1/OLAW128G044366.1/OLAW128G040722.1/OMAW171G04470…	38
GO:0004827	proline-tRNA ligase activity	38/190905	42/383722	2.37875e-08	1.34188e-07	5.46106e-08	OMEM6G026539.1/OGRW100G051492.1/OGRW100G055185.1/OLAW128G052156.1/OLAW128G055540.1/OMAW171G055966.1/OMAW171G052600.1/OALW18G051908.1/OALW18G055532.1/OMIW190G052955.1/OMIW190G056257.1/OAUW26G027856.1/OOFW323G027772.1/OPUW363G055723.1/OPUW363G052420.1/ORHW375G027831.1/OBRW59G024094.1/OEIW71G027951.1/OGLW97G0027941.1/OMEM6G040997.1/OGRW100G078757.1/OGRW100G080775.1/OLAW128G082007.1/OLAW128G079574.1/…	38
GO:0005956	protein kinase CK2 complex	38/190905	42/383722	2.37875e-08	1.34188e-07	5.46106e-08	OMEM6G027887.1/OGRW100G052856.1/OGRW100G056392.1/OLAW128G053550.1/OLAW128G056629.1/OMAW171G057240.1/OMAW171G053805.1/OALW18G053189.1/OALW18G056724.1/OMIW190G054196.1/OMIW190G057476.1/OAUW26G029208.1/OOFW323G028985.1/OPUW363G057014.1/OPUW363G053664.1/ORHW375G029151.1/OBRW59G025154.1/OEIW71G029301.1/OGLW97G0029487.1/OMEM6G036820.1/OGRW100G072466.1/OGRW100G070139.1/OLAW128G070320.1/OLAW128G072948.1/…	38
GO:0006433	prolyl-tRNA aminoacylation	38/190905	42/383722	2.37875e-08	1.34188e-07	5.46106e-08	OMEM6G026539.1/OGRW100G051492.1/OGRW100G055185.1/OLAW128G052156.1/OLAW128G055540.1/OMAW171G055966.1/OMAW171G052600.1/OALW18G051908.1/OALW18G055532.1/OMIW190G052955.1/OMIW190G056257.1/OAUW26G027856.1/OOFW323G027772.1/OPUW363G055723.1/OPUW363G052420.1/ORHW375G027831.1/OBRW59G024094.1/OEIW71G027951.1/OGLW97G0027941.1/OMEM6G040997.1/OGRW100G078757.1/OGRW100G080775.1/OLAW128G082007.1/OLAW128G079574.1/…	38
GO:0006672	ceramide metabolic process	38/190905	42/383722	2.37875e-08	1.34188e-07	5.46106e-08	OMEM6G06121.1/OGRW100G011353.1/OGRW100G05331.1/OLAW128G011325.1/OLAW128G05265.1/OMAW171G05567.1/OMAW171G011411.1/OALW18G011573.1/OALW18G05444.1/OMIW190G011558.1/OAUW26G05952.1/OOFW323G06060.1/OPUW363G011329.1/OPUW363G05678.1/OPUW363G05682.1/ORHW375G05783.1/OBRW59G05516.1/OEIW71G06010.1/OGLW97G006036.1/OMEM6G011639.1/OGRW100G024699.1/OGRW100G028398.1/OLAW128G029438.1/OLAW128G024410.1/OMAW171G02970…	38
GO:0006754	ATP biosynthetic process	38/190905	42/383722	2.37875e-08	1.34188e-07	5.46106e-08	OMEM6G022335.1/OMEM6G03921.1/OGRW100G039736.1/OGRW100G09089.1/OGRW100G03203.1/OGRW100G043038.1/OLAW128G044492.1/OLAW128G08973.1/OLAW128G03091.1/OLAW128G040831.1/OMAW171G03306.1/OMAW171G044821.1/OMAW171G041432.1/OMAW171G08804.1/OALW18G039866.1/OALW18G09279.1/OALW18G03253.1/OALW18G043297.1/OMIW190G03308.1/OMIW190G045167.1/OMIW190G041726.1/OMIW190G08805.1/OAUW26G023438.1/OAUW26G03566.1/OOFW323G02317…	38
GO:0006788	heme oxidation	38/190905	42/383722	2.37875e-08	1.34188e-07	5.46106e-08	OMEM6G015235.1/OGRW100G023380.1/OGRW100G027274.1/OLAW128G028150.1/OLAW128G023218.1/OMAW171G028467.1/OMAW171G023393.1/OALW18G023801.1/OALW18G027882.1/OMIW190G023556.1/OMIW190G028608.1/OAUW26G013637.1/OOFW323G014029.1/OPUW363G023247.1/OPUW363G028146.1/ORHW375G013289.1/OBRW59G012278.1/OEIW71G013361.1/OGLW97G0013254.1/OMEM6G025301.1/OGRW100G045823.1/OGRW100G050069.1/OLAW128G047355.1/OLAW128G050677.1/…	38
GO:0006865	amino acid transport	38/190905	42/383722	2.37875e-08	1.34188e-07	5.46106e-08	OMEM6G03380.1/OGRW100G08517.1/OGRW100G02688.1/OLAW128G08413.1/OLAW128G02581.1/OMAW171G02743.1/OMAW171G08619.1/OALW18G08738.1/OALW18G02697.1/OMIW190G02745.1/OMIW190G08610.1/OAUW26G02986.1/OOFW323G03250.1/OPUW363G08565.1/OPUW363G02839.1/ORHW375G02932.1/OBRW59G03014.1/OEIW71G03198.1/OGLW97G003221.1/OMEM6G017059.1/OGRW100G034326.1/OGRW100G031051.1/OLAW128G032458.1/OLAW128G035907.1/OMAW171G036187.1/OM…	38
GO:0006997	nucleus organization	38/190905	42/383722	2.37875e-08	1.34188e-07	5.46106e-08	OMEM6G04562.1/OGRW100G09781.1/OGRW100G03856.1/OLAW128G09695.1/OLAW128G03756.1/OMAW171G03977.1/OMAW171G09867.1/OALW18G09974.1/OALW18G03927.1/OMIW190G03975.1/OMIW190G09952.1/OAUW26G04316.1/OOFW323G04503.1/OPUW363G09798.1/OPUW363G04120.1/ORHW375G04165.1/OBRW59G04117.1/OEIW71G04454.1/OGLW97G004511.1/OMEM6G09840.1/OGRW100G015121.1/OGRW100G019933.1/OLAW128G015345.1/OLAW128G019575.1/OMAW171G019918.1/OMA…	38
GO:0008253	5'-nucleotidase activity	38/190905	42/383722	2.37875e-08	1.34188e-07	5.46106e-08	OMEM6G011318.1/OGRW100G024346.1/OGRW100G028083.1/OLAW128G029068.1/OLAW128G024079.1/OMAW171G029357.1/OMAW171G024264.1/OALW18G024794.1/OALW18G028688.1/OMIW190G024466.1/OMIW190G029496.1/OAUW26G014713.1/OOFW323G014853.1/OPUW363G024127.1/OPUW363G028964.1/ORHW375G014245.1/OBRW59G013018.1/OEIW71G014265.1/OGLW97G0014345.1/OMEM6G023457.1/OGRW100G044115.1/OGRW100G048470.1/OLAW128G045653.1/OLAW128G049129.1/…	38
GO:0009156	ribonucleoside monophosphate biosynthetic process	38/190905	42/383722	2.37875e-08	1.34188e-07	5.46106e-08	OMEM6G06597.1/OGRW100G011826.1/OGRW100G016328.1/OLAW128G011905.1/OLAW128G016663.1/OMAW171G016512.1/OMAW171G011863.1/OALW18G017034.1/OALW18G012245.1/OMIW190G011902.1/OMIW190G016715.1/OAUW26G06456.1/OOFW323G07202.1/OPUW363G011762.1/OPUW363G016434.1/ORHW375G06185.1/OBRW59G06099.1/OEIW71G06376.1/OGLW97G006474.1/OMEM6G025411.1/OGRW100G045914.1/OGRW100G050167.1/OLAW128G047555.1/OLAW128G050770.1/OMAW171…	38
GO:0009873	ethylene-activated signaling pathway	38/190905	42/383722	2.37875e-08	1.34188e-07	5.46106e-08	OMEM6G011655.1/OGRW100G024718.1/OGRW100G028419.1/OLAW128G029466.1/OLAW128G024430.1/OMAW171G029723.1/OMAW171G024669.1/OALW18G025193.1/OALW18G029060.1/OMIW190G024866.1/OMIW190G029913.1/OAUW26G015095.1/OAUW26G015096.1/OOFW323G015238.1/OPUW363G024502.1/OPUW363G029354.1/ORHW375G014718.1/OBRW59G013322.1/OEIW71G015046.1/OGLW97G0014730.1/OMEM6G026457.1/OGRW100G051425.1/OGRW100G055127.1/OLAW128G052073.1/O…	38
GO:0010497	plasmodesmata-mediated intercellular transport	38/190905	42/383722	2.37875e-08	1.34188e-07	5.46106e-08	OMEM6G033913.1/OGRW100G064948.1/OGRW100G067296.1/OLAW128G067466.1/OLAW128G064982.1/OMAW171G066458.1/OMAW171G068846.1/OALW18G067936.1/OALW18G065362.1/OMIW190G069325.1/OMIW190G066614.1/OAUW26G035230.1/OOFW323G035066.1/OPUW363G068740.1/OPUW363G066116.1/ORHW375G035401.1/OBRW59G030350.1/OEIW71G035744.1/OGLW97G0035951.1/OMEM6G024093.1/OGRW100G044817.1/OGRW100G049027.1/OLAW128G046306.1/OLAW128G049675.1/…	38
GO:0016040	glutamate synthase (NADH) activity	38/190905	42/383722	2.37875e-08	1.34188e-07	5.46106e-08	OMEM6G03904.1/OGRW100G09070.1/OGRW100G03187.1/OLAW128G08956.1/OLAW128G03078.1/OMAW171G03285.1/OMAW171G08825.1/OALW18G09262.1/OALW18G03237.1/OMIW190G03285.1/OMIW190G08822.1/OAUW26G03534.1/OOFW323G03777.1/OPUW363G09125.1/OPUW363G03398.1/ORHW375G03469.1/OBRW59G03517.1/OEIW71G03736.1/OGLW97G003799.1/OMEM6G022357.1/OGRW100G039752.1/OGRW100G043051.1/OLAW128G044510.1/OLAW128G040845.1/OMAW171G044836.1/OM…	38
GO:0016208	AMP binding	38/190905	42/383722	2.37875e-08	1.34188e-07	5.46106e-08	OMEM6G08784.1/OGRW100G013799.1/OGRW100G018566.1/OLAW128G013923.1/OLAW128G018534.1/OMAW171G018521.1/OMAW171G013802.1/OALW18G018994.1/OALW18G014174.1/OMIW190G013930.1/OMIW190G018693.1/OAUW26G08634.1/OOFW323G09211.1/OPUW363G013641.1/OPUW363G018349.1/ORHW375G08152.1/OBRW59G07806.1/OEIW71G08414.1/OGLW97G008449.1/OMEM6G016857.1/OGRW100G034087.1/OGRW100G030831.1/OLAW128G032219.1/OLAW128G035692.1/OMAW171…	38
GO:0019243	methylglyoxal catabolic process to D-lactate via S-lactoyl-glutathione	38/190905	42/383722	2.37875e-08	1.34188e-07	5.46106e-08	OMEM6G014822.1/OGRW100G022970.1/OGRW100G026834.1/OLAW128G027702.1/OLAW128G022807.1/OMAW171G028029.1/OMAW171G022961.1/OALW18G023358.1/OALW18G027416.1/OMIW190G023120.1/OMIW190G028134.1/OAUW26G013176.1/OOFW323G013597.1/OPUW363G022816.1/OPUW363G027719.1/ORHW375G012809.1/OBRW59G011862.1/OEIW71G012919.1/OGLW97G0012729.1/OMEM6G034265.1/OGRW100G065315.1/OGRW100G067627.1/OLAW128G067814.1/OLAW128G065314.1/…	38
GO:0019427	acetyl-CoA biosynthetic process from acetate	38/190905	42/383722	2.37875e-08	1.34188e-07	5.46106e-08	OMEM6G08784.1/OGRW100G013799.1/OGRW100G018566.1/OLAW128G013923.1/OLAW128G018534.1/OMAW171G018521.1/OMAW171G013802.1/OALW18G018994.1/OALW18G014174.1/OMIW190G013930.1/OMIW190G018693.1/OAUW26G08634.1/OOFW323G09211.1/OPUW363G013641.1/OPUW363G018349.1/ORHW375G08152.1/OBRW59G07806.1/OEIW71G08414.1/OGLW97G008449.1/OMEM6G016857.1/OGRW100G034087.1/OGRW100G030831.1/OLAW128G032219.1/OLAW128G035692.1/OMAW171…	38
GO:0030896	checkpoint clamp complex	38/190905	42/383722	2.37875e-08	1.34188e-07	5.46106e-08	OMEM6G014905.1/OGRW100G023036.1/OGRW100G026933.1/OLAW128G027770.1/OLAW128G022905.1/OMAW171G028123.1/OMAW171G023032.1/OALW18G023423.1/OALW18G027519.1/OMIW190G023215.1/OMIW190G028198.1/OAUW26G013278.1/OOFW323G013664.1/OPUW363G022907.1/OPUW363G027785.1/ORHW375G012879.1/OBRW59G011959.1/OEIW71G012985.1/OGLW97G0012844.1/OMEM6G017809.1/OGRW100G035096.1/OGRW100G031789.1/OLAW128G033261.1/OLAW128G036681.1/…	38
GO:0031491	nucleosome binding	38/190905	42/383722	2.37875e-08	1.34188e-07	5.46106e-08	OMEM6G01405.1/OGRW100G07674.1/OGRW100G01924.1/OLAW128G07536.1/OLAW128G01793.1/OMAW171G01948.1/OMAW171G07832.1/OALW18G07874.1/OALW18G01950.1/OMIW190G01940.1/OMIW190G07825.1/OAUW26G02147.1/OOFW323G02450.1/OPUW363G07787.1/OPUW363G02051.1/ORHW375G02137.1/OBRW59G02266.1/OEIW71G02380.1/OGLW97G002268.1/OMEM6G019558.1/OGRW100G036951.1/OGRW100G040550.1/OLAW128G041784.1/OLAW128G038396.1/OMAW171G042266.1/OM…	38
GO:0031519	PcG protein complex	38/190905	42/383722	2.37875e-08	1.34188e-07	5.46106e-08	OMEM6G014626.1/OGRW100G022791.1/OGRW100G026681.1/OLAW128G027496.1/OLAW128G022647.1/OMAW171G027863.1/OMAW171G022756.1/OALW18G023166.1/OALW18G027249.1/OMIW190G022950.1/OMIW190G027954.1/OAUW26G012979.1/OOFW323G013412.1/OPUW363G022646.1/OPUW363G027532.1/ORHW375G012607.1/OBRW59G011714.1/OEIW71G012726.1/OGLW97G0012526.1/OMEM6G024071.1/OGRW100G044642.1/OGRW100G048997.1/OLAW128G046258.1/OLAW128G049652.1/…	38
GO:0032955	regulation of division septum assembly	38/190905	42/383722	2.37875e-08	1.34188e-07	5.46106e-08	OMEM6G012086.1/OGRW100G025232.1/OGRW100G028874.1/OLAW128G030030.1/OLAW128G024885.1/OMAW171G030217.1/OMAW171G025204.1/OALW18G025721.1/OALW18G029533.1/OMIW190G025328.1/OMIW190G030455.1/OAUW26G015600.1/OOFW323G015776.1/OPUW363G024973.1/OPUW363G029871.1/ORHW375G015259.1/OBRW59G013765.1/OEIW71G015593.1/OGLW97G0015231.1/OMEM6G041195.1/OGRW100G079039.1/OGRW100G081230.1/OLAW128G082234.1/OLAW128G079822.1/…	38
GO:0033549	MAP kinase phosphatase activity	38/190905	42/383722	2.37875e-08	1.34188e-07	5.46106e-08	OMEM6G09920.1/OGRW100G015185.1/OGRW100G020033.1/OLAW128G015433.1/OLAW128G019946.1/OMAW171G020003.1/OMAW171G015252.1/OALW18G020421.1/OALW18G015664.1/OMIW190G015377.1/OMIW190G020212.1/OAUW26G010176.1/OOFW323G010689.1/OPUW363G015247.1/OPUW363G019852.1/ORHW375G09717.1/OBRW59G09086.1/OEIW71G09880.1/OGLW97G009708.1/OMEM6G024231.1/OGRW100G044671.1/OGRW100G049142.1/OLAW128G046436.1/OLAW128G049814.1/OMAW1…	38
GO:0033862	UMP kinase activity	38/190905	42/383722	2.37875e-08	1.34188e-07	5.46106e-08	OMEM6G06141.1/OGRW100G011387.1/OGRW100G05355.1/OLAW128G011357.1/OLAW128G05292.1/OMAW171G05598.1/OMAW171G011437.1/OALW18G011609.1/OALW18G05474.1/OMIW190G05618.1/OMIW190G011584.1/OAUW26G05979.1/OOFW323G06093.1/OPUW363G011300.1/OPUW363G05710.1/ORHW375G05811.1/OBRW59G05539.1/OEIW71G06034.1/OGLW97G006066.1/OMEM6G016870.1/OGRW100G034102.1/OGRW100G030837.1/OLAW128G032232.1/OLAW128G035703.1/OMAW171G03597…	38
GO:0035596	methylthiotransFtrase activity	38/190905	42/383722	2.37875e-08	1.34188e-07	5.46106e-08	OMEM6G017052.1/OGRW100G034319.1/OGRW100G031043.1/OLAW128G032450.1/OLAW128G035901.1/OMAW171G036178.1/OMAW171G032431.1/OALW18G031294.1/OALW18G034979.1/OMIW190G036549.1/OMIW190G032830.1/OAUW26G018001.1/OOFW323G017871.1/OPUW363G035865.1/OPUW363G032152.1/ORHW375G017784.1/OBRW59G015811.1/OEIW71G018065.1/OGLW97G0017709.1/OMEM6G039093.1/OGRW100G074685.1/OGRW100G076988.1/OLAW128G077709.1/OLAW128G075007.1/…	38
GO:0043407	negative regulation of MAP kinase activity	38/190905	42/383722	2.37875e-08	1.34188e-07	5.46106e-08	OMEM6G09920.1/OGRW100G015185.1/OGRW100G020033.1/OLAW128G015433.1/OLAW128G019946.1/OMAW171G020003.1/OMAW171G015252.1/OALW18G020421.1/OALW18G015664.1/OMIW190G015377.1/OMIW190G020212.1/OAUW26G010176.1/OOFW323G010689.1/OPUW363G015247.1/OPUW363G019852.1/ORHW375G09717.1/OBRW59G09086.1/OEIW71G09880.1/OGLW97G009708.1/OMEM6G024231.1/OGRW100G044671.1/OGRW100G049142.1/OLAW128G046436.1/OLAW128G049814.1/OMAW1…	38
GO:0046658	anchored component of plasma membrane	38/190905	42/383722	2.37875e-08	1.34188e-07	5.46106e-08	OMEM6G01843.1/OGRW100G046666.1/OGRW100G01144.1/OLAW128G06647.1/OLAW128G01021.1/OMAW171G01058.1/OMAW171G06981.1/OALW18G050191.1/OALW18G01134.1/OMIW190G01037.1/OMIW190G06950.1/OAUW26G01139.1/OOFW323G01580.1/OPUW363G06902.1/OPUW363G01120.1/ORHW375G01206.1/OBRW59G01504.1/OEIW71G01433.1/OGLW97G001312.1/OMEM6G07729.1/OGRW100G013061.1/OGRW100G017477.1/OLAW128G013146.1/OLAW128G017753.1/OMAW171G017729.1/O…	38
GO:0048208	COPII vesicle coating	38/190905	42/383722	2.37875e-08	1.34188e-07	5.46106e-08	OMEM6G06389.1/OGRW100G011626.1/OGRW100G016161.1/OLAW128G011707.1/OLAW128G016502.1/OMAW171G016329.1/OMAW171G011654.1/OALW18G016830.1/OALW18G012079.1/OMIW190G011730.1/OMIW190G016522.1/OAUW26G06289.1/OOFW323G06999.1/OPUW363G011581.1/OPUW363G016240.1/ORHW375G05994.1/OBRW59G05908.1/OEIW71G06190.1/OGLW97G006273.1/OMEM6G022802.1/OGRW100G043443.1/OGRW100G047810.1/OLAW128G044974.1/OLAW128G048512.1/OMAW171…	38
GO:0048578	positive regulation of long-day photoperiodism, flowering	38/190905	42/383722	2.37875e-08	1.34188e-07	5.46106e-08	OMEM6G04428.1/OGRW100G09633.1/OGRW100G03716.1/OLAW128G09559.1/OLAW128G03615.1/OMAW171G03836.1/OMAW171G09730.1/OALW18G09828.1/OALW18G03786.1/OMIW190G03824.1/OMIW190G09820.1/OAUW26G04149.1/OOFW323G04357.1/OPUW363G09678.1/OPUW363G03979.1/ORHW375G04040.1/OBRW59G03994.1/OEIW71G04316.1/OGLW97G004375.1/OMEM6G022002.1/OGRW100G039429.1/OGRW100G042753.1/OLAW128G044176.1/OLAW128G040529.1/OMAW171G044531.1/OM…	38
GO:0050242	pyruvate, phosphate dikinase activity	38/190905	42/383722	2.37875e-08	1.34188e-07	5.46106e-08	OMEM6G015510.1/OMEM6G021203.1/OGRW100G023642.1/OGRW100G038634.1/OGRW100G027508.1/OGRW100G041980.1/OLAW128G028425.1/OLAW128G043335.1/OLAW128G023502.1/OLAW128G039757.1/OMAW171G028734.1/OMAW171G043706.1/OMAW171G023646.1/OMAW171G040298.1/OALW18G024087.1/OALW18G038726.1/OALW18G028101.1/OALW18G042158.1/OMIW190G023764.1/OMIW190G044057.1/OMIW190G028711.1/OMIW190G040570.1/OAUW26G013941.1/OAUW26G022180.1/O…	38
GO:0071339	MLL1 complex	38/190905	42/383722	2.37875e-08	1.34188e-07	5.46106e-08	OMEM6G026744.1/OGRW100G051680.1/OGRW100G055361.1/OLAW128G052343.1/OLAW128G055727.1/OMAW171G056171.1/OMAW171G052778.1/OALW18G052086.1/OALW18G055710.1/OMIW190G053159.1/OMIW190G056442.1/OAUW26G028029.1/OOFW323G027955.1/OPUW363G055924.1/OPUW363G052591.1/ORHW375G028026.1/OBRW59G024231.1/OEIW71G028131.1/OGLW97G0028135.1/OMEM6G012463.1/OGRW100G025574.1/OGRW100G029208.1/OLAW128G030389.1/OLAW128G025215.1/…	38
GO:0071985	multivesicular body sorting pathway	38/190905	42/383722	2.37875e-08	1.34188e-07	5.46106e-08	OMEM6G034358.1/OGRW100G065388.1/OGRW100G067728.1/OLAW128G067893.1/OLAW128G065406.1/OMAW171G066895.1/OMAW171G069245.1/OALW18G068370.1/OALW18G065786.1/OMIW190G069750.1/OMIW190G067018.1/OAUW26G035660.1/OOFW323G035495.1/OPUW363G069163.1/OPUW363G066535.1/ORHW375G035818.1/OBRW59G030732.1/OEIW71G036171.1/OGLW97G0036371.1/OMEM6G03725.1/OGRW100G08893.1/OGRW100G03029.1/OLAW128G08787.1/OLAW128G02921.1/OMAW1…	38
GO:0017108	5'-flap endonuclease activity	35/190905	38/383722	2.83934e-08	1.5968e-07	6.49853e-08	OMEM6G018293.1/OGRW100G035564.1/OGRW100G032236.1/OLAW128G033753.1/OLAW128G037135.1/OMAW171G037432.1/OMAW171G033676.1/OALW18G032578.1/OALW18G036209.1/OMIW190G037795.1/OMIW190G033871.1/OAUW26G019289.1/OOFW323G019106.1/OPUW363G037103.1/OPUW363G033352.1/ORHW375G019076.1/OBRW59G016909.1/OEIW71G019325.1/OGLW97G0018987.1/OMEM6G026962.1/OGRW100G051905.1/OGRW100G055598.1/OLAW128G052634.1/OMAW171G056540.1/…	35
GO:0006487	protein N-linked glycosylation	113/190905	159/383722	3.83807e-08	2.15189e-07	8.7576e-08	OMEM6G017410.1/OGRW100G014251.1/OGRW100G034692.1/OGRW100G019024.1/OGRW100G019025.1/OGRW100G031406.1/OLAW128G014414.1/OLAW128G032821.1/OLAW128G019008.1/OLAW128G019009.1/OLAW128G036274.1/OMAW171G019034.1/OMAW171G019037.1/OMAW171G036557.1/OMAW171G014259.1/OMAW171G014261.1/OMAW171G032819.1/OALW18G019473.1/OALW18G019474.1/OALW18G019477.1/OALW18G031676.1/OALW18G014636.1/OALW18G014637.1/OALW18G035353.1/…	113
GO:0000373	Group II intron splicing	59/190905	73/383722	4.02438e-08	2.24268e-07	9.12707e-08	OMEM6G01376.1/OGRW100G047308.1/OGRW100G0558.1/OLAW128G06001.1/OLAW128G062969.1/OLAW128G0451.1/OMAW171G0466.1/OMAW171G06336.1/OALW18G050858.1/OALW18G0506.1/OMIW190G0459.1/OMIW190G06303.1/OMIW190G064489.1/OAUW26G0515.1/OOFW323G0921.1/OPUW363G06314.1/OPUW363G0515.1/ORHW375G0622.1/OBRW59G0974.1/OEIW71G0834.1/OGLW97G0012995.1/OMEM6G017389.1/OGRW100G034672.1/OGRW100G031389.1/OLAW128G032805.1/OLAW128G03…	59
GO:0048364	root development	59/190905	73/383722	4.02438e-08	2.24268e-07	9.12707e-08	OMEM6G036651.1/OGRW100G072297.1/OGRW100G069987.1/OLAW128G070488.1/OLAW128G072800.1/OMAW171G074403.1/OMAW171G071981.1/OALW18G070984.1/OALW18G073229.1/OMIW190G0215.1/OMIW190G036428.1/OMIW190G074648.1/OMIW190G074747.1/OMIW190G052324.1/OMIW190G072350.1/OAUW26G038310.1/OOFW323G038199.1/OPUW363G074256.1/OPUW363G071761.1/ORHW375G038577.1/OBRW59G033048.1/OEIW71G038691.1/OGLW97G0039001.1/OMEM6G015228.1/OG…	59
GO:0004559	alpha-mannosidase activity	57/190905	70/383722	4.10697e-08	2.26808e-07	9.23045e-08	OMEM6G038740.1/OGRW100G074389.1/OGRW100G076688.1/OLAW128G077352.1/OLAW128G074677.1/OMAW171G079378.1/OMAW171G076465.1/OALW18G075405.1/OALW18G077904.1/OMIW190G079828.1/OMIW190G076928.1/OAUW26G040167.1/OOFW323G040412.1/OPUW363G076332.1/OPUW363G079125.1/ORHW375G040875.1/OBRW59G034925.1/OEIW71G040892.1/OGLW97G0041439.1/OMEM6G023886.1/OGRW100G044475.1/OGRW100G048831.1/OLAW128G046091.1/OLAW128G049489.1/…	57
GO:0006013	mannose metabolic process	57/190905	70/383722	4.10697e-08	2.26808e-07	9.23045e-08	OMEM6G038740.1/OGRW100G074389.1/OGRW100G076688.1/OLAW128G077352.1/OLAW128G074677.1/OMAW171G079378.1/OMAW171G076465.1/OALW18G075405.1/OALW18G077904.1/OMIW190G079828.1/OMIW190G076928.1/OAUW26G040167.1/OOFW323G040412.1/OPUW363G076332.1/OPUW363G079125.1/ORHW375G040875.1/OBRW59G034925.1/OEIW71G040892.1/OGLW97G0041439.1/OMEM6G023886.1/OGRW100G044475.1/OGRW100G048831.1/OLAW128G046091.1/OLAW128G049489.1/…	57
GO:0015930	glutamate synthase activity	57/190905	70/383722	4.10697e-08	2.26808e-07	9.23045e-08	OMEM6G03904.1/OGRW100G09070.1/OGRW100G03187.1/OLAW128G08956.1/OLAW128G03078.1/OMAW171G03285.1/OMAW171G08825.1/OALW18G09262.1/OALW18G03237.1/OMIW190G03285.1/OMIW190G08822.1/OAUW26G03534.1/OOFW323G03777.1/OPUW363G09125.1/OPUW363G03398.1/ORHW375G03469.1/OBRW59G03517.1/OEIW71G03736.1/OGLW97G003799.1/OMEM6G022357.1/OGRW100G039752.1/OGRW100G043051.1/OLAW128G044510.1/OLAW128G040845.1/OMAW171G044836.1/OM…	57
GO:0004645	phosphorylase activity	37/190905	41/383722	4.33842e-08	2.36746e-07	9.63491e-08	OMEM6G05220.1/OGRW100G010435.1/OGRW100G04466.1/OLAW128G010399.1/OLAW128G04397.1/OMAW171G010550.1/OALW18G010658.1/OALW18G04555.1/OMIW190G04637.1/OMIW190G010665.1/OAUW26G04981.1/OOFW323G05154.1/OPUW363G010454.1/OPUW363G04770.1/ORHW375G04833.1/OBRW59G04656.1/OEIW71G05080.1/OGLW97G005154.1/OMEM6G012094.1/OGRW100G025223.1/OGRW100G028865.1/OLAW128G030020.1/OLAW128G024876.1/OMAW171G030208.1/OMAW171G0251…	37
GO:0005740	mitochondrial envelope	37/190905	41/383722	4.33842e-08	2.36746e-07	9.63491e-08	OMEM6G023072.1/OGRW100G043718.1/OGRW100G048089.1/OLAW128G045247.1/OMAW171G045526.1/OMAW171G048980.1/OALW18G047207.1/OALW18G044012.1/OMIW190G045841.1/OMIW190G049332.1/OAUW26G024134.1/OOFW323G023978.1/OPUW363G048689.1/OPUW363G045266.1/ORHW375G024033.1/OBRW59G021017.1/OEIW71G024121.1/OGLW97G0023906.1/OMEM6G03412.1/OGRW100G08564.1/OGRW100G02727.1/OLAW128G08470.1/OLAW128G02614.1/OMAW171G02782.1/OMAW17…	37
GO:0016428	tRNA (cytosine-5-)-methyltransFtrase activity	37/190905	41/383722	4.33842e-08	2.36746e-07	9.63491e-08	OMEM6G031637.1/OGRW100G060005.1/OGRW100G062678.1/OLAW128G062818.1/OLAW128G059898.1/OMAW171G064009.1/OMAW171G061037.1/OALW18G060491.1/OMIW190G061357.1/OMIW190G064344.1/OAUW26G032985.1/OOFW323G033033.1/OPUW363G063760.1/OPUW363G060817.1/ORHW375G033098.1/OBRW59G028315.1/OEIW71G033274.1/OGLW97G0033438.1/OMEM6G033881.1/OGRW100G064913.1/OGRW100G067266.1/OLAW128G067440.1/OLAW128G064955.1/OMAW171G066426.1…	37
GO:0046422	violaxanthin de-epoxidase activity	37/190905	41/383722	4.33842e-08	2.36746e-07	9.63491e-08	OMEM6G04146.1/OGRW100G09330.1/OGRW100G03437.1/OLAW128G09244.1/OLAW128G03343.1/OMAW171G03522.1/OMAW171G09405.1/OALW18G09512.1/OALW18G03504.1/OMIW190G03532.1/OAUW26G03850.1/OOFW323G04051.1/OPUW363G09378.1/OPUW363G03678.1/ORHW375G03739.1/OBRW59G03743.1/OEIW71G04026.1/OGLW97G004093.1/OMEM6G016692.1/OGRW100G033896.1/OGRW100G030675.1/OLAW128G032020.1/OLAW128G035518.1/OMAW171G035734.1/OMAW171G032032.1/O…	37
GO:0051726	regulation of cell cycle	92/190905	125/383722	4.62798e-08	2.518e-07	1.02476e-07	OMEM6G013398.1/OMEM6G035934.1/OGRW100G021529.1/OGRW100G06070.1/OGRW100G071508.1/OGRW100G069270.1/OLAW128G026176.1/OLAW128G069824.1/OLAW128G021384.1/OLAW128G072103.1/OMAW171G026548.1/OMAW171G073634.1/OMAW171G021481.1/OMAW171G071099.1/OALW18G021866.1/OALW18G06195.1/OALW18G070158.1/OALW18G072480.1/OMIW190G021672.1/OMIW190G073982.1/OMIW190G026647.1/OMIW190G071557.1/OAUW26G011660.1/OAUW26G037482.1/OOF…	92
GO:0008649	rRNA methyltransFtrase activity	100/190905	138/383722	4.67169e-08	2.53429e-07	1.03138e-07	OMEM6G06555.1/OGRW100G011788.1/OGRW100G016291.1/OLAW128G011865.1/OLAW128G016621.1/OMAW171G016464.1/OMAW171G011813.1/OALW18G016994.1/OALW18G012210.1/OMIW190G011858.1/OMIW190G016675.1/OAUW26G06417.1/OOFW323G07160.1/OPUW363G011719.1/OPUW363G016390.1/ORHW375G06143.1/OBRW59G06050.1/OEIW71G06333.1/OGLW97G006426.1/OMEM6G027984.1/OGRW100G022837.1/OGRW100G052970.1/OGRW100G041862.1/OGRW100G056474.1/OLAW128…	100
GO:0006259	DNA metabolic process	189/190905	289/383722	5.71394e-08	3.09057e-07	1.25777e-07	OMAW171G079880.1/OLAW128G011187.1/OMIW190G05445.1/ORHW375G05642.1/OLAW128G05129.1/OALW18G011441.1/OMEM6G039214.1/OMEM6G041213.1/OGRW100G074817.1/OGRW100G079034.1/OGRW100G081225.1/OLAW128G077867.1/OLAW128G082227.1/OLAW128G075119.1/OLAW128G079827.1/OMAW171G081893.1/OMAW171G077008.1/OMAW171G084345.1/OALW18G075880.1/OALW18G080383.1/OALW18G078336.1/OALW18G082656.1/OMIW190G080309.1/OMIW190G084941.1/OMI…	189
GO:0017038	protein import	39/190905	44/383722	5.91098e-08	3.17845e-07	1.29354e-07	OMEM6G02299.1/OGRW100G07454.1/OGRW100G01713.1/OLAW128G07261.1/OLAW128G01573.1/OMAW171G01662.1/OMAW171G07582.1/OALW18G07648.1/OALW18G01721.1/OMIW190G01653.1/OMIW190G07559.1/OAUW26G01884.1/OOFW323G02173.1/OPUW363G07521.1/OPUW363G01751.1/ORHW375G01840.1/OBRW59G02031.1/OEIW71G02087.1/OGLW97G001962.1/OMEM6G037773.1/OGRW100G073318.1/OGRW100G075805.1/OLAW128G076210.1/OLAW128G073731.1/OMAW171G078266.1/OM…	39
GO:0071897	DNA biosynthetic process	39/190905	44/383722	5.91098e-08	3.17845e-07	1.29354e-07	OMEM6G036233.1/OGRW100G071843.1/OGRW100G069577.1/OLAW128G070166.1/OLAW128G072394.1/OMAW171G073958.1/OMAW171G071528.1/OALW18G070510.1/OALW18G072797.1/OMIW190G074303.1/OMIW190G071886.1/OAUW26G037826.1/OOFW323G037742.1/OPUW363G073809.1/OPUW363G071315.1/ORHW375G038103.1/OBRW59G032623.1/OEIW71G038223.1/OGLW97G0038628.1/OMEM6G03919.1/OGRW100G09084.1/OGRW100G03201.1/OLAW128G08972.1/OLAW128G03089.1/OMAW1…	39
GO:0016717	oxidoreductase activity, acting on paired donors, with oxidation of a pair of donors resulting in the reduction of molecular oxygen to two molecules of water	96/190905	132/383722	6.40969e-08	3.43656e-07	1.39858e-07	OMEM6G037131.1/OMEM6G039712.1/OGRW100G072650.1/OGRW100G077530.1/OGRW100G075232.1/OGRW100G079895.1/OLAW128G075522.1/OLAW128G080618.1/OLAW128G073184.1/OLAW128G078430.1/OMAW171G077602.1/OMAW171G080399.1/OMAW171G074742.1/OMAW171G082850.1/OALW18G073569.1/OALW18G078778.1/OALW18G076309.1/OALW18G081254.1/OMIW190G078062.1/OMIW190G083397.1/OMIW190G075108.1/OMIW190G080734.1/OAUW26G038632.1/OAUW26G040969.1/O…	96
GO:0034968	histone lysine methylation	222/190905	347/383722	6.43293e-08	3.439e-07	1.39957e-07	OMEM6G031067.1/OGRW100G059521.1/OGRW100G062157.1/OLAW128G059368.1/OMAW171G063451.1/OMAW171G060492.1/OALW18G059957.1/OALW18G062626.1/OMIW190G060776.1/OPUW363G063188.1/OPUW363G060251.1/OBRW59G027870.1/OGLW97G0032836.1/OMEM6G037352.1/OMEM6G039916.1/OGRW100G072865.1/OGRW100G077731.1/OGRW100G075412.1/OGRW100G080090.1/OLAW128G075720.1/OLAW128G080840.1/OLAW128G073358.1/OLAW128G078623.1/OMAW171G077799.1/…	222
GO:0000150	recombinase activity	58/190905	72/383722	6.56979e-08	3.49186e-07	1.42109e-07	OMAW171G079880.1/OMEM6G039214.1/OMEM6G041213.1/OGRW100G074817.1/OGRW100G079034.1/OGRW100G077098.1/OLAW128G077867.1/OLAW128G082227.1/OLAW128G075119.1/OLAW128G079827.1/OMAW171G081893.1/OMAW171G077008.1/OMAW171G084345.1/OALW18G075880.1/OALW18G080383.1/OALW18G078336.1/OMIW190G080309.1/OMIW190G084941.1/OMIW190G077473.1/OMIW190G082282.1/OAUW26G040563.1/OAUW26G042569.1/OOFW323G040968.1/OOFW323G043257.1/…	58
GO:0006360	transcription from RNA polymerase I promoter	58/190905	72/383722	6.56979e-08	3.49186e-07	1.42109e-07	OMEM6G014074.1/OMEM6G032422.1/OGRW100G022218.1/OGRW100G063367.1/OGRW100G06746.1/OGRW100G018928.1/OGRW100G065913.1/OLAW128G026896.1/OLAW128G065896.1/OLAW128G018897.1/OLAW128G04758.1/OLAW128G063585.1/OMAW171G027280.1/OMAW171G064774.1/OMAW171G022153.1/OMAW171G067347.1/OALW18G022568.1/OALW18G066408.1/OALW18G014532.1/OMIW190G022382.1/OMIW190G022384.1/OMIW190G067545.1/OMIW190G027365.1/OMIW190G065096.1/…	58
GO:0003935	GTP cyclohydrolase II activity	52/190905	63/383722	6.78457e-08	3.58529e-07	1.45911e-07	OGRW100G059988.1/OLAW128G062797.1/OLAW128G059880.1/OMAW171G063986.1/OMAW171G061015.1/OALW18G060474.1/OMIW190G061329.1/OMIW190G064328.1/OOFW323G033013.1/OPUW363G063733.1/OPUW363G060797.1/ORHW375G033077.1/OBRW59G028300.1/OEIW71G033251.1/OMEM6G09076.1/OGRW100G014098.1/OGRW100G018882.1/OLAW128G014246.1/OLAW128G018846.1/OMAW171G018877.1/OMAW171G014120.1/OALW18G019324.1/OALW18G014491.1/OMIW190G014244.1…	52
GO:0008686	3,4-dihydroxy-2-butanone-4-phosphate synthase activity	52/190905	63/383722	6.78457e-08	3.58529e-07	1.45911e-07	OGRW100G059988.1/OLAW128G062797.1/OLAW128G059880.1/OMAW171G063986.1/OMAW171G061015.1/OALW18G060474.1/OMIW190G061329.1/OMIW190G064328.1/OOFW323G033013.1/OPUW363G063733.1/OPUW363G060797.1/ORHW375G033077.1/OBRW59G028300.1/OEIW71G033251.1/OMEM6G09076.1/OGRW100G014098.1/OGRW100G018882.1/OLAW128G014246.1/OLAW128G018846.1/OMAW171G018877.1/OMAW171G014120.1/OALW18G019324.1/OALW18G014491.1/OMIW190G014244.1…	52
GO:0004742	dihydrolipoyllysine-residue acetyltransFtrase activity	54/190905	66/383722	6.83343e-08	3.59048e-07	1.46122e-07	OMEM6G027382.1/OMEM6G06391.1/OGRW100G052232.1/OGRW100G055973.1/OLAW128G053044.1/OLAW128G016503.1/OLAW128G056176.1/OMAW171G016330.1/OMAW171G056809.1/OMAW171G053379.1/OALW18G016831.1/OALW18G052637.1/OALW18G056337.1/OMIW190G011731.1/OMIW190G053840.1/OMIW190G057055.1/OAUW26G028726.1/OOFW323G028573.1/OOFW323G07000.1/OPUW363G011582.1/OPUW363G056553.1/OPUW363G016241.1/OPUW363G053243.1/ORHW375G028753.1/O…	54
GO:0045254	pyruvate dehydrogenase complex	54/190905	66/383722	6.83343e-08	3.59048e-07	1.46122e-07	OMEM6G027382.1/OMEM6G06391.1/OGRW100G052232.1/OGRW100G055973.1/OLAW128G053044.1/OLAW128G016503.1/OLAW128G056176.1/OMAW171G016330.1/OMAW171G056809.1/OMAW171G053379.1/OALW18G016831.1/OALW18G052637.1/OALW18G056337.1/OMIW190G011731.1/OMIW190G053840.1/OMIW190G057055.1/OAUW26G028726.1/OOFW323G028573.1/OOFW323G07000.1/OPUW363G011582.1/OPUW363G056553.1/OPUW363G016241.1/OPUW363G053243.1/ORHW375G028753.1/O…	54
GO:0004618	phosphoglycerate kinase activity	91/190905	124/383722	6.88545e-08	3.60751e-07	1.46815e-07	OMEM6G025802.1/OMEM6G06934.1/OMEM6G06936.1/OGRW100G012164.1/OGRW100G046265.1/OGRW100G016675.1/OGRW100G050498.1/OLAW128G012275.1/OLAW128G047913.1/OLAW128G016980.1/OLAW128G051102.1/OMAW171G016846.1/OMAW171G012221.1/OMAW171G051536.1/OALW18G017480.1/OALW18G049779.1/OALW18G066277.1/OALW18G012599.1/OALW18G046395.1/OMIW190G012242.1/OMIW190G048476.1/OMIW190G017110.1/OMIW190G051919.1/OAUW26G026914.1/OAUW2…	91
GO:0000470	maturation of LSU-rRNA	36/190905	40/383722	7.89339e-08	4.06609e-07	1.65478e-07	OMEM6G021909.1/OMEM6G030060.1/OGRW100G039359.1/OGRW100G07976.1/OGRW100G02176.1/OGRW100G042691.1/OLAW128G044109.1/OLAW128G07827.1/OLAW128G02059.1/OLAW128G040464.1/OMAW171G02206.1/OMAW171G044452.1/OMAW171G041027.1/OMAW171G08071.1/OALW18G039455.1/OALW18G08172.1/OALW18G02191.1/OALW18G042902.1/OMIW190G02186.1/OMIW190G044813.1/OMIW190G041308.1/OMIW190G08069.1/OAUW26G02439.1/OOFW323G022768.1/OOFW323G026…	36
GO:0003688	DNA replication origin binding	36/190905	40/383722	7.89339e-08	4.06609e-07	1.65478e-07	OMEM6G010497.1/OMEM6G02686.1/OGRW100G015804.1/OGRW100G07952.1/OGRW100G020707.1/OGRW100G02155.1/OLAW128G016120.1/OLAW128G07808.1/OLAW128G02038.1/OLAW128G020581.1/OMAW171G020671.1/OMAW171G046827.1/OMAW171G015955.1/OMAW171G08055.1/OALW18G021047.1/OALW18G08151.1/OALW18G016351.1/OALW18G02170.1/OMIW190G016039.1/OMIW190G047154.1/OMIW190G020879.1/OMIW190G08051.1/OAUW26G010869.1/OAUW26G02416.1/OOFW323G011…	36
GO:0008139	nuclear localization sequence binding	36/190905	40/383722	7.89339e-08	4.06609e-07	1.65478e-07	OMEM6G012184.1/OGRW100G025287.1/OGRW100G028924.1/OLAW128G030099.1/OLAW128G024941.1/OMAW171G030265.1/OMAW171G025258.1/OALW18G025778.1/OMIW190G025379.1/OMIW190G030512.1/OAUW26G015654.1/OOFW323G015822.1/OPUW363G025027.1/OPUW363G029927.1/ORHW375G015313.1/OEIW71G015647.1/OGLW97G0015289.1/OMEM6G033739.1/OGRW100G064766.1/OGRW100G067134.1/OLAW128G067301.1/OLAW128G064793.1/OMAW171G066264.1/OMAW171G068674.…	36
GO:0017070	U6 snRNA binding	36/190905	40/383722	7.89339e-08	4.06609e-07	1.65478e-07	OMEM6G023261.1/OGRW100G037050.1/OGRW100G043935.1/OGRW100G040654.1/OGRW100G048288.1/OLAW128G041897.1/OLAW128G045470.1/OLAW128G038486.1/OLAW128G048951.1/OMAW171G042366.1/OMAW171G045727.1/OMAW171G038953.1/OMAW171G049193.1/OALW18G037240.1/OALW18G047438.1/OALW18G040796.1/OALW18G044209.1/OMIW190G042513.1/OMIW190G046055.1/OMIW190G039265.1/OMIW190G049554.1/OAUW26G020755.1/OAUW26G024339.1/OOFW323G020671.1…	36
GO:0030623	U5 snRNA binding	36/190905	40/383722	7.89339e-08	4.06609e-07	1.65478e-07	OMEM6G023261.1/OGRW100G037050.1/OGRW100G043935.1/OGRW100G040654.1/OGRW100G048288.1/OLAW128G041897.1/OLAW128G045470.1/OLAW128G038486.1/OLAW128G048951.1/OMAW171G042366.1/OMAW171G045727.1/OMAW171G038953.1/OMAW171G049193.1/OALW18G037240.1/OALW18G047438.1/OALW18G040796.1/OALW18G044209.1/OMIW190G042513.1/OMIW190G046055.1/OMIW190G039265.1/OMIW190G049554.1/OAUW26G020755.1/OAUW26G024339.1/OOFW323G020671.1…	36
GO:1990426	mitotic recombination-dependent replication fork processing	36/190905	40/383722	7.89339e-08	4.06609e-07	1.65478e-07	OMAW171G079880.1/OMEM6G039214.1/OMEM6G041213.1/OGRW100G074817.1/OGRW100G079034.1/OGRW100G077098.1/OLAW128G077867.1/OLAW128G082227.1/OLAW128G075119.1/OLAW128G079827.1/OMAW171G081893.1/OMAW171G077008.1/OMAW171G084345.1/OALW18G075880.1/OALW18G080383.1/OALW18G078336.1/OMIW190G080309.1/OMIW190G084941.1/OMIW190G077473.1/OMIW190G082282.1/OAUW26G040563.1/OAUW26G042569.1/OOFW323G040968.1/OOFW323G043257.1/…	36
GO:0008356	asymmetric cell division	77/190905	102/383722	9.37435e-08	4.81548e-07	1.95977e-07	OMEM6G025614.1/OGRW100G046114.1/OGRW100G050342.1/OLAW128G047746.1/OLAW128G050948.1/OLAW128G050953.1/OMAW171G047975.1/OMAW171G051377.1/OALW18G049626.1/OALW18G046235.1/OMIW190G048324.1/OMIW190G051766.1/OAUW26G026750.1/OOFW323G026439.1/OPUW363G051202.1/OPUW363G047710.1/ORHW375G026509.1/OBRW59G023135.1/OEIW71G026636.1/OGLW97G0026736.1/OMEM6G010514.1/OGRW100G015784.1/OGRW100G020685.1/OLAW128G016095.1/…	77
GO:0016624	oxidoreductase activity, acting on the aldehyde or oxo group of donors, disulfide as acceptor	95/190905	131/383722	9.42459e-08	4.82781e-07	1.96478e-07	OMEM6G016769.1/OMEM6G029416.1/OGRW100G033975.1/OGRW100G030741.1/OGRW100G032673.1/OGRW100G057765.1/OLAW128G032102.1/OLAW128G055119.1/OLAW128G035591.1/OLAW128G058036.1/OMAW171G035811.1/OMAW171G058808.1/OMAW171G032107.1/OMAW171G055443.1/OALW18G030922.1/OALW18G034654.1/OALW18G036666.1/OALW18G058176.1/OMIW190G036208.1/OMIW190G055757.1/OMIW190G032465.1/OMIW190G059063.1/OAUW26G016445.1/OAUW26G017650.1/O…	95
GO:0006310	DNA recombination	245/190905	389/383722	1.00663e-07	5.14222e-07	2.09274e-07	OALW18G04445.1/OMEM6G036233.1/OGRW100G071843.1/OGRW100G069577.1/OLAW128G070166.1/OLAW128G072394.1/OMAW171G073958.1/OMAW171G071528.1/OALW18G070510.1/OALW18G072797.1/OMIW190G074303.1/OMIW190G071886.1/OAUW26G037826.1/OOFW323G037742.1/OPUW363G073809.1/OPUW363G071315.1/ORHW375G038103.1/OBRW59G032623.1/OEIW71G038223.1/OGLW97G0038628.1/OMEM6G039658.1/OGRW100G075198.1/OLAW128G078392.1/OLAW128G075471.1/OM…	245
GO:0004564	beta-fructofuranosidase activity	38/190905	43/383722	1.05677e-07	5.28096e-07	2.1492e-07	OMEM6G06402.1/OGRW100G011637.1/OGRW100G016165.1/OLAW128G011717.1/OLAW128G016509.1/OMAW171G016342.1/OMAW171G011662.1/OALW18G016840.1/OALW18G012083.1/OMIW190G011736.1/OMIW190G016534.1/OAUW26G06295.1/OOFW323G07011.1/OPUW363G011587.1/OPUW363G016250.1/ORHW375G06001.1/OBRW59G05915.1/OEIW71G06197.1/OGLW97G006281.1/OMEM6G017867.1/OGRW100G035160.1/OGRW100G031852.1/OLAW128G033322.1/OLAW128G036735.1/OMAW171…	38
GO:0004575	sucrose alpha-glucosidase activity	38/190905	43/383722	1.05677e-07	5.28096e-07	2.1492e-07	OMEM6G06402.1/OGRW100G011637.1/OGRW100G016165.1/OLAW128G011717.1/OLAW128G016509.1/OMAW171G016342.1/OMAW171G011662.1/OALW18G016840.1/OALW18G012083.1/OMIW190G011736.1/OMIW190G016534.1/OAUW26G06295.1/OOFW323G07011.1/OPUW363G011587.1/OPUW363G016250.1/ORHW375G06001.1/OBRW59G05915.1/OEIW71G06197.1/OGLW97G006281.1/OMEM6G017867.1/OGRW100G035160.1/OGRW100G031852.1/OLAW128G033322.1/OLAW128G036735.1/OMAW171…	38
GO:0004594	pantothenate kinase activity	38/190905	43/383722	1.05677e-07	5.28096e-07	2.1492e-07	OMEM6G023559.1/OGRW100G044205.1/OGRW100G048555.1/OLAW128G045789.1/OLAW128G049228.1/OMAW171G045993.1/OMAW171G049481.1/OALW18G047728.1/OALW18G044500.1/OMIW190G046325.1/OMIW190G049844.1/OAUW26G024650.1/OOFW323G024489.1/OPUW363G049148.1/OPUW363G045766.1/ORHW375G024559.1/OBRW59G021449.1/OEIW71G024613.1/OGLW97G0024484.1/OMEM6G034383.1/OGRW100G065437.1/OGRW100G067754.1/OLAW128G067942.1/OLAW128G065434.1/…	38
GO:0004748	ribonucleoside-diphosphate reductase activity, thioredoxin disulfide as acceptor	38/190905	43/383722	1.05677e-07	5.28096e-07	2.1492e-07	OMEM6G010578.1/OMEM6G023276.1/OGRW100G015861.1/OGRW100G043951.1/OGRW100G020765.1/OGRW100G048301.1/OLAW128G016174.1/OLAW128G045485.1/OLAW128G020642.1/OLAW128G048965.1/OMAW171G020726.1/OMAW171G045739.1/OMAW171G016015.1/OMAW171G049210.1/OALW18G021105.1/OALW18G047453.1/OALW18G016405.1/OALW18G044227.1/OMIW190G016098.1/OMIW190G046066.1/OMIW190G020933.1/OMIW190G049575.1/OAUW26G010922.1/OAUW26G024354.1/O…	38
GO:0008184	glycogen phosphorylase activity	38/190905	43/383722	1.05677e-07	5.28096e-07	2.1492e-07	OMEM6G05220.1/OGRW100G010435.1/OGRW100G04466.1/OLAW128G010399.1/OLAW128G04397.1/OMAW171G04649.1/OMAW171G010550.1/OALW18G010658.1/OALW18G04555.1/OMIW190G04637.1/OMIW190G010665.1/OAUW26G04981.1/OOFW323G05154.1/OPUW363G010454.1/OPUW363G04770.1/ORHW375G04833.1/OBRW59G04656.1/OEIW71G05080.1/OGLW97G005154.1/OMEM6G012094.1/OGRW100G025223.1/OGRW100G028865.1/OLAW128G030020.1/OLAW128G024876.1/OMAW171G03020…	38
GO:0010330	cellulose synthase complex	38/190905	43/383722	1.05677e-07	5.28096e-07	2.1492e-07	OMEM6G023717.1/OGRW100G044339.1/OGRW100G048691.1/OLAW128G045918.1/OLAW128G049343.1/OMAW171G046138.1/OMAW171G049603.1/OALW18G047869.1/OALW18G044632.1/OMIW190G046472.1/OMIW190G049981.1/OAUW26G024791.1/OOFW323G024633.1/OPUW363G049290.1/OPUW363G045891.1/ORHW375G024691.1/OBRW59G021578.1/OEIW71G024755.1/OGLW97G0024612.1/OMEM6G037733.1/OGRW100G073276.1/OGRW100G075756.1/OLAW128G076159.1/OLAW128G073685.1/…	38
GO:0051211	anisotropic cell growth	38/190905	43/383722	1.05677e-07	5.28096e-07	2.1492e-07	OMEM6G023717.1/OGRW100G044339.1/OGRW100G048691.1/OLAW128G045918.1/OLAW128G049343.1/OMAW171G046138.1/OMAW171G049603.1/OALW18G047869.1/OALW18G044632.1/OMIW190G046472.1/OMIW190G049981.1/OAUW26G024791.1/OOFW323G024633.1/OPUW363G049290.1/OPUW363G045891.1/ORHW375G024691.1/OBRW59G021578.1/OEIW71G024755.1/OGLW97G0024612.1/OMEM6G037733.1/OGRW100G073276.1/OGRW100G075756.1/OLAW128G076159.1/OLAW128G073685.1/…	38
GO:2001006	regulation of cellulose biosynthetic process	38/190905	43/383722	1.05677e-07	5.28096e-07	2.1492e-07	OMEM6G023717.1/OGRW100G044339.1/OGRW100G048691.1/OLAW128G045918.1/OLAW128G049343.1/OMAW171G046138.1/OMAW171G049603.1/OALW18G047869.1/OALW18G044632.1/OMIW190G046472.1/OMIW190G049981.1/OAUW26G024791.1/OOFW323G024633.1/OPUW363G049290.1/OPUW363G045891.1/ORHW375G024691.1/OBRW59G021578.1/OEIW71G024755.1/OGLW97G0024612.1/OMEM6G037733.1/OGRW100G073276.1/OGRW100G075756.1/OLAW128G076159.1/OLAW128G073685.1/…	38
GO:0005094	Rho GDP-dissociation inhibitor activity	57/190905	71/383722	1.06917e-07	5.32848e-07	2.16854e-07	OMEM6G05746.1/OGRW100G010954.1/OGRW100G04952.1/OLAW128G010916.1/OLAW128G04876.1/OMAW171G05164.1/OMAW171G011037.1/OALW18G011163.1/OALW18G05051.1/OMIW190G05169.1/OMIW190G011153.1/OAUW26G05502.1/OOFW323G05635.1/OPUW363G010958.1/OPUW363G05276.1/ORHW375G05366.1/OBRW59G05102.1/OEIW71G05587.1/OGLW97G005661.1/OMEM6G09907.1/OGRW100G015178.1/OGRW100G020022.1/OLAW128G015423.1/OLAW128G019937.1/OMAW171G019989…	57
GO:0016701	oxidoreductase activity, acting on single donors with incorporation of molecular oxygen	53/190905	65/383722	1.1293e-07	5.61291e-07	2.2843e-07	OMEM6G05470.1/OGRW100G010677.1/OGRW100G010678.1/OGRW100G04694.1/OGRW100G04695.1/OLAW128G010632.1/OLAW128G010633.1/OLAW128G04616.1/OLAW128G04617.1/OMAW171G04881.1/OMAW171G04882.1/OMAW171G010770.1/OMAW171G010771.1/OALW18G010894.1/OALW18G010895.1/OALW18G04786.1/OMIW190G04877.1/OMIW190G04878.1/OMIW190G010881.1/OMIW190G010882.1/OAUW26G05232.1/OAUW26G05233.1/OOFW323G05366.1/OPUW363G010670.1/OPUW363G010…	53
GO:0001510	RNA methylation	189/190905	291/383722	1.20731e-07	5.98448e-07	2.43551e-07	OMEM6G034542.1/OGRW100G015221.1/OGRW100G065623.1/OGRW100G020068.1/OGRW100G067911.1/OLAW128G015473.1/OLAW128G068136.1/OLAW128G019985.1/OLAW128G065603.1/OMAW171G020038.1/OMAW171G067120.1/OMAW171G069497.1/OALW18G068615.1/OALW18G015704.1/OALW18G065980.1/OMIW190G015415.1/OMIW190G069960.1/OMIW190G020249.1/OMIW190G067260.1/OAUW26G010222.1/OAUW26G035851.1/OOFW323G010734.1/OOFW323G035729.1/OPUW363G015287.…	189
GO:0004364	glutathione transFtrase activity	40/190905	46/383722	1.30485e-07	6.4506e-07	2.62521e-07	OAUW26G021831.1/OMEM6G010643.1/OMEM6G032228.1/OGRW100G015933.1/OGRW100G020850.1/OLAW128G016242.1/OLAW128G020716.1/OMAW171G020796.1/OMAW171G016079.1/OALW18G021175.1/OALW18G016487.1/OMIW190G016169.1/OMIW190G020998.1/OAUW26G010995.1/OOFW323G011438.1/OPUW363G015997.1/OPUW363G020675.1/ORHW375G010527.1/OBRW59G09771.1/OEIW71G010663.1/OGLW97G0010524.1/OMEM6G08076.1/OGRW100G013263.1/OGRW100G017657.1/OLAW1…	40
GO:0005198	structural molecule activity	297/190905	483/383722	1.3836e-07	6.82158e-07	2.77619e-07	OMEM6G011758.1/OGRW100G024828.1/OGRW100G024831.1/OGRW100G063583.1/OGRW100G028505.1/OGRW100G028507.1/OGRW100G066009.1/OLAW128G029589.1/OLAW128G029596.1/OLAW128G066072.1/OLAW128G024526.1/OLAW128G024528.1/OLAW128G063683.1/OMAW171G029813.1/OMAW171G029814.1/OMAW171G064912.1/OMAW171G081535.1/OMAW171G024784.1/OMAW171G024788.1/OMAW171G067443.1/OALW18G025318.1/OALW18G025322.1/OALW18G066546.1/OALW18G029156…	297
GO:0004831	tyrosine-tRNA ligase activity	76/190905	101/383722	1.43067e-07	6.95078e-07	2.82877e-07	OMEM6G029792.1/OGRW100G058160.1/OGRW100G058470.1/OGRW100G059101.1/OGRW100G061269.1/OGRW100G061843.1/OLAW128G060910.1/OLAW128G061219.1/OLAW128G061773.1/OLAW128G058350.1/OLAW128G059071.1/OMAW171G062418.1/OMAW171G063038.1/OMAW171G079556.1/OMAW171G059176.1/OMAW171G060095.1/OALW18G058588.1/OALW18G058903.1/OALW18G059570.1/OALW18G062274.1/OMIW190G059727.1/OMIW190G060373.1/OMIW190G079997.1/OMIW190G062427…	76
GO:0004588	orotate phosphoribosyltransFtrase activity	35/190905	39/383722	1.43249e-07	6.95078e-07	2.82877e-07	OMEM6G06041.1/OGRW100G011258.1/OGRW100G011260.1/OGRW100G05238.1/OGRW100G05239.1/OLAW128G011229.1/OLAW128G011231.1/OLAW128G05164.1/OLAW128G05165.1/OMAW171G05470.1/OMAW171G05471.1/OMAW171G011324.1/OMAW171G011326.1/OALW18G011481.1/OALW18G011483.1/OALW18G05355.1/OMIW190G05483.1/OMIW190G05484.1/OMIW190G011460.1/OMIW190G011463.1/OAUW26G05844.1/OAUW26G05846.1/OOFW323G05959.1/OOFW323G05962.1/OPUW363G0114…	35
GO:0032051	clathrin light chain binding	35/190905	39/383722	1.43249e-07	6.95078e-07	2.82877e-07	OMEM6G039718.1/OGRW100G072653.1/OGRW100G077526.1/OGRW100G075236.1/OGRW100G079901.1/OLAW128G075527.1/OLAW128G080613.1/OLAW128G073189.1/OLAW128G078434.1/OMAW171G077605.1/OMAW171G080402.1/OMAW171G074746.1/OMAW171G082844.1/OALW18G073573.1/OALW18G078771.1/OALW18G076314.1/OALW18G081260.1/OMIW190G078065.1/OMIW190G083400.1/OMIW190G075112.1/OMIW190G080729.1/OAUW26G038636.1/OAUW26G040975.1/OOFW323G038587.1…	35
GO:0047918	GDP-mannose 3,5-epimerase activity	35/190905	39/383722	1.43249e-07	6.95078e-07	2.82877e-07	OMEM6G035770.1/OMEM6G039076.1/OGRW100G071371.1/OGRW100G074672.1/OGRW100G069144.1/OLAW128G069685.1/OLAW128G077691.1/OLAW128G071970.1/OMAW171G073522.1/OMAW171G079720.1/OMAW171G071029.1/OMAW171G076837.1/OALW18G070025.1/OALW18G075723.1/OALW18G072353.1/OMIW190G073868.1/OMIW190G080159.1/OMIW190G071444.1/OMIW190G077283.1/OAUW26G037317.1/OAUW26G040443.1/OOFW323G037250.1/OOFW323G040783.1/OPUW363G073354.1/…	35
GO:0060548	negative regulation of cell death	35/190905	39/383722	1.43249e-07	6.95078e-07	2.82877e-07	OMEM6G08766.1/OGRW100G013766.1/OGRW100G018533.1/OLAW128G013894.1/OLAW128G018504.1/OMAW171G013782.1/OALW18G018963.1/OALW18G014146.1/OMIW190G018667.1/OAUW26G08600.1/OOFW323G09182.1/OPUW363G018318.1/ORHW375G08123.1/OBRW59G07781.1/OEIW71G08384.1/OGLW97G008429.1/OMEM6G020981.1/OGRW100G038399.1/OGRW100G041762.1/OLAW128G043110.1/OLAW128G039568.1/OMAW171G043519.1/OMAW171G040099.1/OALW18G038486.1/OALW18G0…	35
GO:0071439	clathrin complex	35/190905	39/383722	1.43249e-07	6.95078e-07	2.82877e-07	OMEM6G039718.1/OGRW100G072653.1/OGRW100G077526.1/OGRW100G075236.1/OGRW100G079901.1/OLAW128G075527.1/OLAW128G080613.1/OLAW128G073189.1/OLAW128G078434.1/OMAW171G077605.1/OMAW171G080402.1/OMAW171G074746.1/OMAW171G082844.1/OALW18G073573.1/OALW18G078771.1/OALW18G076314.1/OALW18G081260.1/OMIW190G078065.1/OMIW190G083400.1/OMIW190G075112.1/OMIW190G080729.1/OAUW26G038636.1/OAUW26G040975.1/OOFW323G038587.1…	35
GO:0031929	TOR signaling	58/190905	73/383722	1.6412e-07	7.92172e-07	3.22391e-07	OMEM6G037202.1/OMEM6G039762.1/OGRW100G072687.1/OGRW100G077578.1/OGRW100G075286.1/OGRW100G079948.1/OLAW128G075558.1/OLAW128G080676.1/OLAW128G073242.1/OLAW128G078475.1/OMAW171G077651.1/OMAW171G080458.1/OMAW171G074798.1/OMAW171G082909.1/OALW18G073605.1/OALW18G078831.1/OALW18G076369.1/OALW18G081297.1/OMIW190G078107.1/OMIW190G083458.1/OMIW190G075167.1/OMIW190G080779.1/OAUW26G038672.1/OAUW26G041022.1/O…	58
GO:0031931	TORC1 complex	58/190905	73/383722	1.6412e-07	7.92172e-07	3.22391e-07	OMEM6G037202.1/OMEM6G039762.1/OGRW100G072687.1/OGRW100G077578.1/OGRW100G075286.1/OGRW100G079948.1/OLAW128G075558.1/OLAW128G080676.1/OLAW128G073242.1/OLAW128G078475.1/OMAW171G077651.1/OMAW171G080458.1/OMAW171G074798.1/OMAW171G082909.1/OALW18G073605.1/OALW18G078831.1/OALW18G076369.1/OALW18G081297.1/OMIW190G078107.1/OMIW190G083458.1/OMIW190G075167.1/OMIW190G080779.1/OAUW26G038672.1/OAUW26G041022.1/O…	58
GO:0051607	deFtnse response to virus	32/190905	35/383722	1.8031e-07	8.68035e-07	3.53266e-07	OMEM6G040354.1/OGRW100G078435.1/OGRW100G078436.1/OGRW100G080475.1/OLAW128G081358.1/OLAW128G079019.1/OLAW128G079020.1/OMAW171G081069.1/OMAW171G081070.1/OMAW171G083570.1/OMAW171G083571.1/OALW18G079717.1/OALW18G079718.1/OALW18G081846.1/OMIW190G084078.1/OMIW190G081431.1/OMIW190G081432.1/OAUW26G041613.1/OAUW26G041614.1/OOFW323G042432.1/OOFW323G042433.1/OPUW363G080903.1/OPUW363G080904.1/OPUW363G083506.…	32
GO:0008622	epsilon DNA polymerase complex	50/190905	61/383722	1.87923e-07	8.90661e-07	3.62474e-07	OGRW100G059874.1/OGRW100G040639.1/OGRW100G062548.1/OLAW128G041877.1/OLAW128G062677.1/OLAW128G038472.1/OMAW171G042348.1/OMAW171G063870.1/OMAW171G038933.1/OMAW171G060902.1/OALW18G037222.1/OALW18G060362.1/OALW18G040778.1/OMIW190G042529.1/OMIW190G061200.1/OMIW190G061201.1/OMIW190G039249.1/OMIW190G064218.1/OAUW26G020738.1/OAUW26G032826.1/OOFW323G020653.1/OOFW323G032901.1/OPUW363G038505.1/OPUW363G04196…	50
GO:0004806	triglyceride lipase activity	37/190905	42/383722	1.884e-07	8.90661e-07	3.62474e-07	OMEM6G012585.1/OGRW100G025675.1/OGRW100G029304.1/OLAW128G030486.1/OLAW128G025317.1/OMAW171G030597.1/OMAW171G025873.1/OALW18G026193.1/OALW18G029985.1/OMIW190G025774.1/OMIW190G031124.1/OAUW26G016044.1/OOFW323G016219.1/OPUW363G025414.1/OPUW363G030313.1/ORHW375G015721.1/OBRW59G014155.1/OEIW71G016044.1/OGLW97G0015689.1/OMEM6G04516.1/OGRW100G09735.1/OGRW100G03805.1/OLAW128G09650.1/OLAW128G03709.1/OMAW1…	37
GO:0006654	phosphatidic acid biosynthetic process	37/190905	42/383722	1.884e-07	8.90661e-07	3.62474e-07	OMEM6G020871.1/OGRW100G038286.1/OGRW100G041661.1/OLAW128G042995.1/OLAW128G039486.1/OMAW171G039996.1/OALW18G038372.1/OALW18G041851.1/OMIW190G043707.1/OMIW190G040288.1/OAUW26G021837.1/OOFW323G021707.1/OPUW363G039567.1/OPUW363G043067.1/ORHW375G021734.1/OBRW59G019122.1/OEIW71G021738.1/OGLW97G0021482.1/OMEM6G02252.1/OGRW100G07405.1/OGRW100G01667.1/OLAW128G07208.1/OLAW128G01476.1/OMAW171G01615.1/OMAW17…	37
GO:0045737	positive regulation of cyclin-dependent protein serine/threonine kinase activity	37/190905	42/383722	1.884e-07	8.90661e-07	3.62474e-07	OMEM6G023290.1/OMEM6G038554.1/OGRW100G043963.1/OGRW100G074149.1/OGRW100G048317.1/OGRW100G076462.1/OLAW128G045494.1/OLAW128G077089.1/OLAW128G048981.1/OLAW128G074459.1/OMAW171G045756.1/OMAW171G079267.1/OMAW171G049221.1/OMAW171G076231.1/OALW18G047468.1/OALW18G075131.1/OALW18G044248.1/OMIW190G046086.1/OMIW190G079738.1/OMIW190G049588.1/OMIW190G076653.1/OAUW26G024368.1/OAUW26G039932.1/OOFW323G024235.1/…	37
GO:0048017	inositol lipid-mediated signaling	37/190905	42/383722	1.884e-07	8.90661e-07	3.62474e-07	OMEM6G020871.1/OGRW100G038286.1/OGRW100G041661.1/OLAW128G042995.1/OLAW128G039486.1/OMAW171G039996.1/OALW18G038372.1/OALW18G041851.1/OMIW190G043707.1/OMIW190G040288.1/OAUW26G021837.1/OOFW323G021707.1/OPUW363G039567.1/OPUW363G043067.1/ORHW375G021734.1/OBRW59G019122.1/OEIW71G021738.1/OGLW97G0021482.1/OMEM6G02252.1/OGRW100G07405.1/OGRW100G01667.1/OLAW128G07208.1/OLAW128G01476.1/OMAW171G01615.1/OMAW17…	37
GO:0061575	cyclin-dependent protein serine/threonine kinase activator activity	37/190905	42/383722	1.884e-07	8.90661e-07	3.62474e-07	OMEM6G023290.1/OMEM6G038554.1/OGRW100G043963.1/OGRW100G074149.1/OGRW100G048317.1/OGRW100G076462.1/OLAW128G045494.1/OLAW128G077089.1/OLAW128G048981.1/OLAW128G074459.1/OMAW171G045756.1/OMAW171G079267.1/OMAW171G049221.1/OMAW171G076231.1/OALW18G047468.1/OALW18G075131.1/OALW18G044248.1/OMIW190G046086.1/OMIW190G079738.1/OMIW190G049588.1/OMIW190G076653.1/OAUW26G024368.1/OAUW26G039932.1/OOFW323G024235.1/…	37
GO:1990610	acetolactate synthase regulator activity	37/190905	42/383722	1.884e-07	8.90661e-07	3.62474e-07	OMEM6G038041.1/OGRW100G014358.1/OGRW100G073638.1/OGRW100G019094.1/OGRW100G076072.1/OLAW128G014525.1/OLAW128G076578.1/OLAW128G019088.1/OMAW171G019147.1/OMAW171G014363.1/OMAW171G075785.1/OALW18G019583.1/OALW18G074625.1/OALW18G014720.1/OALW18G077194.1/OMIW190G014530.1/OMIW190G019304.1/OMIW190G076200.1/OAUW26G09208.1/OOFW323G039647.1/OOFW323G09830.1/OPUW363G014323.1/OPUW363G075593.1/OPUW363G018942.1/…	37
GO:0030619	U1 snRNA binding	34/190905	38/383722	2.59273e-07	1.22257e-06	4.97552e-07	OMEM6G034843.1/OMEM6G036377.1/OGRW100G070350.1/OGRW100G068190.1/OGRW100G069710.1/OLAW128G068529.1/OLAW128G070815.1/OLAW128G071057.1/OLAW128G072524.1/OMAW171G072360.1/OMAW171G074115.1/OMAW171G069861.1/OMAW171G071684.1/OALW18G068959.1/OALW18G070681.1/OALW18G071385.1/OALW18G072939.1/OMIW190G072723.1/OMIW190G074462.1/OMIW190G070231.1/OMIW190G072049.1/OAUW26G036098.1/OAUW26G038016.1/OOFW323G036075.1/O…	34
GO:0070536	protein K63-linked deubiquitination	57/190905	72/383722	2.63551e-07	1.23956e-06	5.04467e-07	OMEM6G02371.1/OGRW100G07539.1/OGRW100G01778.1/OLAW128G07339.1/OLAW128G01645.1/OMAW171G01754.1/OMAW171G07676.1/OALW18G07742.1/OALW18G01787.1/OMIW190G01737.1/OMIW190G07645.1/OAUW26G01981.1/OOFW323G02265.1/OPUW363G07602.1/OPUW363G01854.1/ORHW375G01953.1/OBRW59G02114.1/OBRW59G02115.1/OEIW71G02189.1/OGLW97G002062.1/OMEM6G02826.1/OGRW100G07849.1/OGRW100G02052.1/OLAW128G07721.1/OLAW128G01917.1/OMAW171G0…	57
GO:0004450	isocitrate dehydrogenase (NADP+) activity	71/190905	94/383722	2.83129e-07	1.32487e-06	5.39184e-07	OMEM6G01940.1/OMEM6G022536.1/OMEM6G03696.1/OGRW100G046552.1/OGRW100G08861.1/OGRW100G01257.1/OGRW100G03001.1/OGRW100G043211.1/OLAW128G044698.1/OLAW128G06776.1/OLAW128G08761.1/OLAW128G01134.1/OLAW128G02888.1/OMAW171G01179.1/OMAW171G03077.1/OMAW171G044997.1/OMAW171G041627.1/OMAW171G07093.1/OMAW171G09022.1/OALW18G040081.1/OALW18G050069.1/OALW18G09072.1/OALW18G01252.1/OALW18G03048.1/OMIW190G01165.1/OM…	71
GO:0006102	isocitrate metabolic process	71/190905	94/383722	2.83129e-07	1.32487e-06	5.39184e-07	OMEM6G01940.1/OMEM6G022536.1/OMEM6G03696.1/OGRW100G046552.1/OGRW100G08861.1/OGRW100G01257.1/OGRW100G03001.1/OGRW100G043211.1/OLAW128G044698.1/OLAW128G06776.1/OLAW128G08761.1/OLAW128G01134.1/OLAW128G02888.1/OMAW171G01179.1/OMAW171G03077.1/OMAW171G044997.1/OMAW171G041627.1/OMAW171G07093.1/OMAW171G09022.1/OALW18G040081.1/OALW18G050069.1/OALW18G09072.1/OALW18G01252.1/OALW18G03048.1/OMIW190G01165.1/OM…	71
GO:0030915	Smc5-Smc6 complex	135/190905	200/383722	2.88673e-07	1.34738e-06	5.48348e-07	OMEM6G037333.1/OMEM6G039889.1/OGRW100G072852.1/OGRW100G077716.1/OGRW100G075401.1/OLAW128G075709.1/OLAW128G080826.1/OLAW128G073348.1/OLAW128G078613.1/OMAW171G080599.1/OMAW171G074941.1/OALW18G073785.1/OALW18G078970.1/OALW18G076485.1/OALW18G081431.1/OMIW190G078240.1/OMIW190G083600.1/OMIW190G075307.1/OMIW190G080939.1/OAUW26G038811.1/OAUW26G041152.1/OOFW323G038793.1/OOFW323G041893.1/OPUW363G074771.1/O…	135
GO:0043087	regulation of GTPase activity	47/190905	57/383722	3.10871e-07	1.44732e-06	5.89019e-07	OMEM6G032707.1/OGRW100G052213.1/OGRW100G063667.1/OGRW100G066117.1/OLAW128G066107.1/OLAW128G063786.1/OMAW171G056709.1/OMAW171G065078.1/OMAW171G053249.1/OALW18G052617.1/OALW18G066634.1/OALW18G064122.1/OMIW190G053690.1/OMIW190G067973.1/OMIW190G056956.1/OMIW190G065311.1/OAUW26G033931.1/OOFW323G028458.1/OOFW323G033706.1/OPUW363G056504.1/OPUW363G067324.1/OPUW363G053024.1/OPUW363G064716.1/ORHW375G034090…	47
GO:0006122	mitochondrial electron transport, ubiquinol to cytochrome c	79/190905	107/383722	3.23358e-07	1.50165e-06	6.11131e-07	OMEM6G012530.1/OMEM6G026833.1/OGRW100G012917.1/OGRW100G051779.1/OGRW100G029263.1/OGRW100G055460.1/OLAW128G030443.1/OLAW128G052451.1/OLAW128G025274.1/OLAW128G055799.1/OMAW171G030557.1/OMAW171G056263.1/OMAW171G025609.1/OMAW171G052871.1/OALW18G052186.1/OALW18G029886.1/OALW18G055804.1/OMIW190G025731.1/OMIW190G053252.1/OMIW190G030849.1/OMIW190G056534.1/OAUW26G028120.1/OOFW323G016172.1/OOFW323G028043.1…	79
GO:0010224	response to UV-B	31/190905	34/383722	3.32339e-07	1.53947e-06	6.26522e-07	OMEM6G017066.1/OMEM6G08965.1/OGRW100G034331.1/OGRW100G018772.1/OGRW100G031058.1/OLAW128G032463.1/OLAW128G018728.1/OLAW128G035912.1/OMAW171G018735.1/OMAW171G036194.1/OMAW171G013999.1/OMAW171G032445.1/OALW18G031308.1/OALW18G014369.1/OALW18G034991.1/OMIW190G036562.1/OMIW190G032840.1/OAUW26G018015.1/OAUW26G08837.1/OOFW323G017886.1/OPUW363G013451.1/OPUW363G035876.1/OPUW363G018567.1/OPUW363G032168.1/OR…	31
GO:0034220	ion transmembrane transport	36/190905	41/383722	3.34892e-07	1.5474e-06	6.29749e-07	OMEM6G010755.1/OGRW100G016030.1/OGRW100G032814.1/OGRW100G020971.1/OGRW100G029900.1/OLAW128G016360.1/OLAW128G031097.1/OLAW128G020819.1/OLAW128G034847.1/OMAW171G020904.1/OMAW171G034807.1/OMAW171G016184.1/OMAW171G031239.1/OALW18G021285.1/OALW18G016611.1/OALW18G033747.1/OMIW190G016280.1/OMIW190G035264.1/OMIW190G021117.1/OMIW190G031508.1/OAUW26G011108.1/OAUW26G016622.1/OOFW323G011544.1/OOFW323G016563.…	36
GO:0000272	polysaccharide catabolic process	140/190905	209/383722	3.52532e-07	1.62077e-06	6.59606e-07	OMEM6G028227.1/OMEM6G028232.1/OGRW100G053194.1/OGRW100G056652.1/OGRW100G056660.1/OLAW128G053918.1/OLAW128G056907.1/OLAW128G056910.1/OMAW171G057613.1/OMAW171G057619.1/OMAW171G054158.1/OALW18G053523.1/OALW18G057021.1/OMIW190G054528.1/OMIW190G054532.1/OMIW190G057825.1/OAUW26G029557.1/OOFW323G029342.1/OPUW363G057379.1/OPUW363G057385.1/OPUW363G054007.1/ORHW375G029483.1/OBRW59G025467.1/OBRW59G025470.1/…	140
GO:0016161	beta-amylase activity	140/190905	209/383722	3.52532e-07	1.62077e-06	6.59606e-07	OMEM6G028227.1/OMEM6G028232.1/OGRW100G053194.1/OGRW100G056652.1/OGRW100G056660.1/OLAW128G053918.1/OLAW128G056907.1/OLAW128G056910.1/OMAW171G057613.1/OMAW171G057619.1/OMAW171G054158.1/OALW18G053523.1/OALW18G057021.1/OMIW190G054528.1/OMIW190G054532.1/OMIW190G057825.1/OAUW26G029557.1/OOFW323G029342.1/OPUW363G057379.1/OPUW363G057385.1/OPUW363G054007.1/ORHW375G029483.1/OBRW59G025467.1/OBRW59G025470.1/…	140
GO:0036402	proteasome-activating ATPase activity	170/190905	261/383722	3.80198e-07	1.7436e-06	7.09597e-07	OMEM6G010444.1/OMEM6G023455.1/OGRW100G015700.1/OGRW100G015704.1/OGRW100G044112.1/OGRW100G020590.1/OGRW100G048466.1/OLAW128G045651.1/OLAW128G020483.1/OLAW128G049127.1/OMAW171G020567.1/OMAW171G045909.1/OMAW171G015838.1/OMAW171G049387.1/OALW18G020949.1/OALW18G020953.1/OALW18G047621.1/OALW18G016238.1/OALW18G044403.1/OMIW190G015931.1/OMIW190G046229.1/OMIW190G020765.1/OMIW190G049740.1/OAUW26G010763.1/O…	170
GO:0008283	cell proliFtration	99/190905	140/383722	3.82031e-07	1.74765e-06	7.11245e-07	OPUW363G077651.1/OMEM6G037473.1/OMEM6G040038.1/OGRW100G073014.1/OGRW100G077898.1/OGRW100G075531.1/OGRW100G080223.1/OLAW128G075877.1/OLAW128G081009.1/OLAW128G073479.1/OLAW128G078747.1/OMAW171G077951.1/OMAW171G080736.1/OMAW171G075098.1/OMAW171G083241.1/OALW18G073953.1/OALW18G079158.1/OALW18G076626.1/OALW18G081580.1/OMIW190G078406.1/OMIW190G083748.1/OMIW190G075470.1/OMIW190G081105.1/OAUW26G038940.1/…	99
GO:0006306	DNA methylation	58/190905	74/383722	3.89791e-07	1.77872e-06	7.2389e-07	OOFW323G038547.1/OOFW323G038642.1/OEIW71G039093.1/OMEM6G013035.1/OGRW100G021157.1/OGRW100G05673.1/OGRW100G072698.1/OGRW100G077569.1/OGRW100G075277.1/OLAW128G025797.1/OLAW128G075567.1/OLAW128G020995.1/OLAW128G073231.1/OLAW128G073233.1/OMAW171G026156.1/OMAW171G021093.1/OMAW171G074789.1/OALW18G021492.1/OALW18G05766.1/OALW18G073615.1/OALW18G078823.1/OALW18G076357.1/OMIW190G021296.1/OMIW190G026254.1/O…	58
GO:0009263	deoxyribonucleotide biosynthetic process	38/190905	44/383722	4.006e-07	1.81008e-06	7.36653e-07	OMEM6G022948.1/OMEM6G023947.1/OGRW100G043568.1/OGRW100G044544.1/OGRW100G047959.1/OGRW100G048902.1/OLAW128G045013.1/OLAW128G046159.1/OLAW128G048649.1/OLAW128G049552.1/OMAW171G045391.1/OMAW171G046364.1/OMAW171G048847.1/OMAW171G049831.1/OALW18G047070.1/OALW18G048095.1/OALW18G043880.1/OALW18G044830.1/OMIW190G045718.1/OMIW190G046689.1/OMIW190G049194.1/OMIW190G050196.1/OAUW26G024015.1/OAUW26G025013.1/O…	38
GO:0040029	regulation of gene expression, epigenetic	38/190905	44/383722	4.006e-07	1.81008e-06	7.36653e-07	OMEM6G010425.1/OGRW100G015690.1/OGRW100G020583.1/OLAW128G015991.1/OLAW128G020472.1/OMAW171G020558.1/OMAW171G015827.1/OALW18G020940.1/OALW18G016231.1/OMIW190G015922.1/OMIW190G020756.1/OAUW26G010753.1/OOFW323G011184.1/OPUW363G015765.1/OPUW363G020424.1/ORHW375G010264.1/OBRW59G09545.1/OEIW71G010422.1/OGLW97G0010263.1/OMEM6G06465.1/OGRW100G011680.1/OGRW100G016205.1/OLAW128G011761.1/OLAW128G016548.1/OM…	38
GO:0042134	rRNA primary transcript binding	38/190905	44/383722	4.006e-07	1.81008e-06	7.36653e-07	OMEM6G01792.1/OGRW100G043672.1/OGRW100G048044.1/OLAW128G045210.1/OLAW128G048728.1/OMAW171G045487.1/OMAW171G048939.1/OALW18G047166.1/OALW18G043966.1/OMIW190G045805.1/OMIW190G049287.1/OAUW26G024095.1/OOFW323G023927.1/OPUW363G048654.1/OPUW363G045232.1/ORHW375G023993.1/OBRW59G020986.1/OEIW71G024078.1/OGLW97G0023864.1/OMEM6G029843.1/OGRW100G058186.1/OGRW100G061038.1/OLAW128G060940.1/OLAW128G058391.1/O…	38
GO:0050790	regulation of catalytic activity	38/190905	44/383722	4.006e-07	1.81008e-06	7.36653e-07	OMEM6G039675.1/OMEM6G07410.1/OGRW100G072601.1/OGRW100G020815.1/OGRW100G075200.1/OGRW100G079851.1/OLAW128G030894.1/OLAW128G030898.1/OLAW128G075497.1/OLAW128G073139.1/OMAW171G077561.1/OMAW171G080353.1/OMAW171G031021.1/OMAW171G031025.1/OMAW171G074701.1/OALW18G073527.1/OALW18G076269.1/OALW18G081211.1/OMIW190G078025.1/OMIW190G031308.1/OMIW190G031312.1/OMIW190G075066.1/OAUW26G040943.1/OOFW323G016369.1/…	38
GO:0019104	DNA N-glycosylase activity	56/190905	71/383722	4.21787e-07	1.90114e-06	7.73711e-07	OMEM6G025576.1/OGRW100G046071.1/OGRW100G050296.1/OLAW128G047699.1/OLAW128G050909.1/OMAW171G047917.1/OMAW171G051338.1/OALW18G049584.1/OALW18G046183.1/OMIW190G048274.1/OMIW190G051724.1/OAUW26G026706.1/OOFW323G026398.1/OPUW363G051154.1/OPUW363G047661.1/ORHW375G026473.1/OBRW59G023096.1/OEIW71G026597.1/OGLW97G0026683.1/OMEM6G030483.1/OGRW100G059047.1/OGRW100G061719.1/OLAW128G061815.1/OLAW128G058984.1/…	56
GO:0005664	nuclear origin of replication recognition complex	40/190905	47/383722	4.52503e-07	2.02964e-06	8.26007e-07	OMEM6G028869.1/OGRW100G053824.1/OGRW100G057296.1/OLAW128G054581.1/OLAW128G057556.1/OMAW171G058294.1/OMAW171G054841.1/OALW18G054156.1/OALW18G057696.1/OMIW190G055240.1/OMIW190G058480.1/OOFW323G030012.1/OPUW363G058086.1/OPUW363G054649.1/ORHW375G030147.1/OBRW59G026038.1/OEIW71G030321.1/OGLW97G0030510.1/OMAW171G019871.1/OMIW190G015245.1/OPUW363G015101.1/OMEM6G035762.1/OGRW100G071260.1/OGRW100G069032.1…	40
GO:0097428	protein maturation by iron-sulfur cluster transFtr	40/190905	47/383722	4.52503e-07	2.02964e-06	8.26007e-07	OMEM6G026639.1/OGRW100G051588.1/OGRW100G055268.1/OLAW128G052247.1/OLAW128G055635.1/OMAW171G056069.1/OMAW171G052670.1/OALW18G051991.1/OALW18G055619.1/OMIW190G053057.1/OMIW190G056334.1/OAUW26G027931.1/OOFW323G027861.1/OPUW363G055822.1/OPUW363G052493.1/ORHW375G027900.1/ORHW375G027901.1/ORHW375G027925.1/OBRW59G024164.1/OEIW71G028034.1/OGLW97G0028038.1/OMEM6G013361.1/OGRW100G078812.1/OGRW100G081056.1/…	40
GO:0006342	chromatin silencing	33/190905	37/383722	4.6795e-07	2.09382e-06	8.52126e-07	OMEM6G035445.1/OGRW100G071043.1/OGRW100G068666.1/OLAW128G069165.1/OLAW128G071524.1/OMAW171G070467.1/OALW18G069700.1/OMIW190G070858.1/OAUW26G036773.1/OOFW323G036708.1/OPUW363G070338.1/ORHW375G037044.1/OBRW59G031783.1/OEIW71G037205.1/OMEM6G09232.1/OGRW100G014480.1/OGRW100G019293.1/OLAW128G014690.1/OLAW128G019259.1/OMAW171G019274.1/OMAW171G014534.1/OALW18G019710.1/OALW18G014933.1/OMIW190G014663.1/OM…	33
GO:0015098	molybdate ion transmembrane transporter activity	78/190905	106/383722	4.82941e-07	2.15043e-06	8.75166e-07	OMEM6G013080.1/OMEM6G036450.1/OGRW100G021189.1/OGRW100G05706.1/OGRW100G072092.1/OGRW100G069788.1/OLAW128G025826.1/OLAW128G070726.1/OLAW128G021030.1/OLAW128G072603.1/OMAW171G026193.1/OMAW171G021127.1/OMAW171G071774.1/OALW18G021526.1/OALW18G05803.1/OALW18G070771.1/OALW18G073024.1/OMIW190G021333.1/OMIW190G074560.1/OMIW190G026288.1/OMIW190G072142.1/OAUW26G011318.1/OAUW26G038101.1/OOFW323G011832.1/OOF…	78
GO:0015689	molybdate ion transport	78/190905	106/383722	4.82941e-07	2.15043e-06	8.75166e-07	OMEM6G013080.1/OMEM6G036450.1/OGRW100G021189.1/OGRW100G05706.1/OGRW100G072092.1/OGRW100G069788.1/OLAW128G025826.1/OLAW128G070726.1/OLAW128G021030.1/OLAW128G072603.1/OMAW171G026193.1/OMAW171G021127.1/OMAW171G071774.1/OALW18G021526.1/OALW18G05803.1/OALW18G070771.1/OALW18G073024.1/OMIW190G021333.1/OMIW190G074560.1/OMIW190G026288.1/OMIW190G072142.1/OAUW26G011318.1/OAUW26G038101.1/OOFW323G011832.1/OOF…	78
GO:0000829	inositol heptakisphosphate kinase activity	42/190905	50/383722	4.89041e-07	2.17234e-06	8.84079e-07	OMEM6G04659.1/OGRW100G09861.1/OGRW100G03949.1/OGRW100G061795.1/OLAW128G09790.1/OLAW128G03844.1/OLAW128G059047.1/OMAW171G04070.1/OMAW171G09949.1/OALW18G010062.1/OALW18G04013.1/OALW18G062230.1/OMIW190G04072.1/OMIW190G010049.1/OAUW26G031893.1/OAUW26G031894.1/OOFW323G04587.1/OPUW363G09883.1/OPUW363G04211.1/OPUW363G04212.1/ORHW375G04255.1/OBRW59G04196.1/OEIW71G04535.1/OGLW97G004595.1/OMEM6G011575.1/OG…	42
GO:0004590	orotidine-5'-phosphate decarboxylase activity	35/190905	40/383722	5.93454e-07	2.61717e-06	1.06512e-06	OMEM6G06041.1/OGRW100G011258.1/OGRW100G011260.1/OGRW100G05238.1/OGRW100G05239.1/OLAW128G011229.1/OLAW128G011231.1/OLAW128G05164.1/OLAW128G05165.1/OMAW171G05470.1/OMAW171G05471.1/OMAW171G011324.1/OMAW171G011326.1/OALW18G011481.1/OALW18G011483.1/OALW18G05355.1/OMIW190G05483.1/OMIW190G05484.1/OMIW190G011460.1/OMIW190G011463.1/OAUW26G05844.1/OAUW26G05846.1/OOFW323G05959.1/OOFW323G05962.1/OPUW363G0114…	35
GO:0016633	galactonolactone dehydrogenase activity	35/190905	40/383722	5.93454e-07	2.61717e-06	1.06512e-06	OMEM6G037432.1/OMEM6G040005.1/OGRW100G077858.1/OGRW100G075496.1/OGRW100G080193.1/OLAW128G075832.1/OLAW128G080967.1/OLAW128G073439.1/OMAW171G077904.1/OMAW171G080703.1/OMAW171G075056.1/OMAW171G083194.1/OALW18G079109.1/OALW18G076587.1/OALW18G081534.1/OMIW190G078355.1/OMIW190G083707.1/OMIW190G075424.1/OMIW190G081056.1/OAUW26G038903.1/OAUW26G041246.1/OOFW323G038914.1/OOFW323G042023.1/OPUW363G074884.1/…	35
GO:0044205	'de novo' UMP biosynthetic process	35/190905	40/383722	5.93454e-07	2.61717e-06	1.06512e-06	OMEM6G06041.1/OGRW100G011258.1/OGRW100G011260.1/OGRW100G05238.1/OGRW100G05239.1/OLAW128G011229.1/OLAW128G011231.1/OLAW128G05164.1/OLAW128G05165.1/OMAW171G05470.1/OMAW171G05471.1/OMAW171G011324.1/OMAW171G011326.1/OALW18G011481.1/OALW18G011483.1/OALW18G05355.1/OMIW190G05483.1/OMIW190G05484.1/OMIW190G011460.1/OMIW190G011463.1/OAUW26G05844.1/OAUW26G05846.1/OOFW323G05959.1/OOFW323G05962.1/OPUW363G0114…	35
GO:0004526	ribonuclease P activity	30/190905	33/383722	6.10976e-07	2.68159e-06	1.09133e-06	OMEM6G039684.1/OMEM6G040562.1/OGRW100G072619.1/OGRW100G075213.1/OGRW100G079871.1/OLAW128G075482.1/OLAW128G073156.1/OLAW128G078407.1/OMAW171G077578.1/OMAW171G080951.1/OMAW171G074715.1/OALW18G073541.1/OALW18G076287.1/OALW18G081231.1/OMIW190G078040.1/OMIW190G083372.1/OMIW190G083954.1/OMIW190G075081.1/OAUW26G038602.1/OAUW26G040949.1/OOFW323G038619.1/OPUW363G074572.1/OPUW363G080783.1/OPUW363G082751.1/…	30
GO:0030121	AP-1 adaptor complex	30/190905	33/383722	6.10976e-07	2.68159e-06	1.09133e-06	OMEM6G010579.1/OMEM6G023262.1/OGRW100G043937.1/OGRW100G020768.1/OGRW100G048289.1/OLAW128G016177.1/OLAW128G045472.1/OLAW128G020643.1/OLAW128G048952.1/OMAW171G045728.1/OMAW171G049197.1/OALW18G047440.1/OALW18G016408.1/OALW18G044212.1/OMIW190G046056.1/OMIW190G049558.1/OAUW26G010927.1/OAUW26G024341.1/OOFW323G011368.1/OOFW323G024206.1/OPUW363G048897.1/OPUW363G020606.1/OPUW363G045497.1/ORHW375G010461.1/…	30
GO:0005672	transcription factor TFIIA complex	57/190905	73/383722	6.17771e-07	2.70495e-06	1.10084e-06	OMEM6G06175.1/OGRW100G011431.1/OGRW100G058179.1/OGRW100G040221.1/OGRW100G05390.1/OLAW128G011404.1/OLAW128G060930.1/OLAW128G038072.1/OLAW128G05325.1/OMAW171G041924.1/OMAW171G05645.1/OMAW171G011472.1/OMAW171G059225.1/OALW18G011613.1/OALW18G058610.1/OALW18G040366.1/OALW18G05511.1/OMIW190G042208.1/OMIW190G05671.1/OMIW190G011618.1/OMIW190G062472.1/OAUW26G020293.1/OAUW26G06011.1/OOFW323G031146.1/OOFW32…	57
GO:0047262	polygalacturonate 4-alpha-galacturonosyltransFtrase activity	266/190905	433/383722	6.65205e-07	2.90573e-06	1.18255e-06	OMEM6G026178.1/OMEM6G034374.1/OGRW100G065420.1/OGRW100G065422.1/OGRW100G026272.1/OGRW100G050866.1/OGRW100G067744.1/OLAW128G048304.1/OLAW128G067926.1/OLAW128G067929.1/OLAW128G051459.1/OLAW128G065425.1/OMAW171G048501.1/OMAW171G048502.1/OMAW171G066934.1/OMAW171G069277.1/OMAW171G069280.1/OALW18G068409.1/OALW18G068411.1/OALW18G026823.1/OALW18G046758.1/OALW18G065805.1/OMIW190G048837.1/OMIW190G069784.1/…	266
GO:0030042	actin filament depolymerization	135/190905	202/383722	6.87435e-07	2.99572e-06	1.21917e-06	OGRW100G029018.1/OLAW128G025039.1/OALW18G029682.1/OMEM6G012280.1/OMEM6G041869.1/OGRW100G025390.1/OGRW100G079753.1/OGRW100G081869.1/OLAW128G030209.1/OLAW128G083034.1/OLAW128G080465.1/OMAW171G030377.1/OMAW171G082700.1/OMAW171G025361.1/OALW18G025891.1/OALW18G081097.1/OALW18G083342.1/OMIW190G025481.1/OMIW190G085733.1/OMIW190G085734.1/OMIW190G030618.1/OMIW190G083249.1/OAUW26G015762.1/OAUW26G043338.1/O…	135
GO:0000184	nuclear-transcribed mRNA catabolic process, nonsense-mediated decay	129/190905	192/383722	7.72735e-07	3.35948e-06	1.36721e-06	OMEM6G022874.1/OGRW100G043504.1/OGRW100G047882.1/OLAW128G045086.1/OLAW128G048579.1/OMAW171G045325.1/OMAW171G048759.1/OALW18G047005.1/OALW18G043806.1/OMIW190G045659.1/OMIW190G049102.1/OAUW26G023943.1/OOFW323G023737.1/OPUW363G048494.1/OPUW363G045046.1/ORHW375G023820.1/OBRW59G020849.1/OEIW71G023909.1/OGLW97G0023694.1/OMEM6G09262.1/OGRW100G014516.1/OGRW100G019326.1/OLAW128G014723.1/OLAW128G019292.1/O…	129
GO:0004591	oxoglutarate dehydrogenase (succinyl-transFtrring) activity	39/190905	46/383722	7.77801e-07	3.37353e-06	1.37293e-06	OMEM6G016769.1/OMEM6G029416.1/OGRW100G033975.1/OGRW100G030741.1/OGRW100G032673.1/OGRW100G057765.1/OLAW128G032102.1/OLAW128G055119.1/OLAW128G035591.1/OLAW128G058036.1/OMAW171G035811.1/OMAW171G058808.1/OMAW171G032107.1/OMAW171G055443.1/OALW18G030922.1/OALW18G034654.1/OALW18G036666.1/OALW18G058176.1/OMIW190G036208.1/OMIW190G055757.1/OMIW190G032465.1/OMIW190G059063.1/OAUW26G016445.1/OAUW26G017650.1/O…	39
GO:0004616	phosphogluconate dehydrogenase (decarboxylating) activity	41/190905	49/383722	8.29902e-07	3.59104e-06	1.46145e-06	OMEM6G05820.1/OMEM6G022849.1/OMEM6G037275.1/OMEM6G05821.1/OGRW100G043489.1/OGRW100G047858.1/OLAW128G045107.1/OLAW128G048557.1/OMAW171G045301.1/OMAW171G048738.1/OALW18G046991.1/OALW18G043783.1/OMIW190G045640.1/OMIW190G049080.1/OAUW26G023918.1/OOFW323G023715.1/OPUW363G048470.1/OPUW363G045027.1/ORHW375G023802.1/OBRW59G020826.1/OEIW71G023889.1/OGLW97G0023666.1/OMEM6G038595.1/OGRW100G074214.1/OGRW100G…	41
GO:0006269	DNA replication, synthesis of RNA primer	58/190905	75/383722	8.83457e-07	3.8138e-06	1.55211e-06	OMEM6G020865.1/OGRW100G038281.1/OGRW100G052457.1/OGRW100G052458.1/OGRW100G041657.1/OLAW128G042991.1/OLAW128G053122.1/OLAW128G037909.1/OLAW128G039482.1/OMAW171G043387.1/OMAW171G056865.1/OMAW171G039989.1/OMAW171G053435.1/OMAW171G053436.1/OALW18G038364.1/OALW18G052805.1/OALW18G052806.1/OALW18G041848.1/OMIW190G043700.1/OMIW190G053792.1/OMIW190G040281.1/OMIW190G057112.1/OMIW190G057113.1/OAUW26G020128.…	58
GO:0008373	sialyltransFtrase activity	81/190905	112/383722	9.75058e-07	4.18218e-06	1.70203e-06	OMEM6G05290.1/OGRW100G010496.1/OGRW100G04520.1/OLAW128G010463.1/OLAW128G04452.1/OMAW171G04722.1/OMAW171G010602.1/OALW18G010716.1/OALW18G04610.1/OMIW190G04713.1/OMIW190G010715.1/OAUW26G05049.1/OOFW323G05220.1/OPUW363G010505.1/OPUW363G04838.1/ORHW375G04892.1/OBRW59G04708.1/OEIW71G05146.1/OGLW97G005215.1/OMEM6G06505.1/OGRW100G011740.1/OGRW100G016239.1/OLAW128G011813.1/OLAW128G016575.1/OMAW171G016417…	81
GO:0030259	lipid glycosylation	56/190905	72/383722	9.75613e-07	4.18218e-06	1.70203e-06	OMEM6G027515.1/OGRW100G032793.1/OGRW100G052446.1/OGRW100G029882.1/OGRW100G056024.1/OLAW128G031058.1/OLAW128G053112.1/OLAW128G034833.1/OLAW128G056321.1/OMAW171G034788.1/OMAW171G056859.1/OMAW171G031215.1/OMAW171G053425.1/OALW18G052795.1/OALW18G033729.1/OALW18G056380.1/OMIW190G035247.1/OMIW190G031486.1/OMIW190G057118.1/OAUW26G016608.1/OAUW26G028860.1/OOFW323G016537.1/OOFW323G016540.1/OOFW323G016541.…	56
GO:0043139	5'-3' DNA helicase activity	56/190905	72/383722	9.75613e-07	4.18218e-06	1.70203e-06	OMEM6G026646.1/OGRW100G010318.1/OGRW100G051594.1/OGRW100G04357.1/OGRW100G055274.1/OLAW128G010276.1/OLAW128G052253.1/OLAW128G04282.1/OLAW128G055644.1/OMAW171G04523.1/OMAW171G056080.1/OMAW171G010417.1/OMAW171G052676.1/OALW18G010536.1/OALW18G051997.1/OALW18G04445.1/OALW18G055628.1/OMIW190G04524.1/OMIW190G010528.1/OMIW190G056363.1/OAUW26G027938.1/OAUW26G04863.1/OOFW323G027867.1/OOFW323G05045.1/OPUW36…	56
GO:0006098	pentose-phosphate shunt	142/190905	215/383722	1.01875e-06	4.35692e-06	1.77314e-06	OMEM6G015392.1/OMEM6G028703.1/OGRW100G023520.1/OGRW100G053652.1/OGRW100G027410.1/OGRW100G057120.1/OLAW128G028309.1/OLAW128G054399.1/OLAW128G023339.1/OLAW128G057385.1/OMAW171G028626.1/OMAW171G058109.1/OMAW171G023522.1/OMAW171G054649.1/OALW18G023957.1/OALW18G028015.1/OALW18G057509.1/OMIW190G023711.1/OMIW190G055037.1/OMIW190G028828.1/OMIW190G058285.1/OAUW26G013825.1/OAUW26G030104.1/OOFW323G014167.1/…	142
GO:0005674	transcription factor TFIIF complex	36/190905	42/383722	1.21384e-06	5.17925e-06	2.10781e-06	OGRW100G039379.1/OMEM6G021954.1/OMEM6G04594.1/OGRW100G09826.1/OGRW100G03898.1/OGRW100G042707.1/OLAW128G044127.1/OLAW128G09738.1/OLAW128G03794.1/OLAW128G040481.1/OMAW171G04012.1/OMAW171G044478.1/OMAW171G041047.1/OMAW171G09903.1/OALW18G010019.1/OALW18G039475.1/OALW18G03965.1/OALW18G042920.1/OMIW190G04020.1/OMIW190G044838.1/OMIW190G041329.1/OMIW190G09994.1/OAUW26G023078.1/OAUW26G04356.1/OOFW323G0227…	36
GO:0008531	riboflavin kinase activity	26/190905	28/383722	1.34286e-06	5.7165e-06	2.32645e-06	OMEM6G019671.1/OMEM6G036038.1/OGRW100G069399.1/OLAW128G072233.1/OMAW171G073772.1/OALW18G072613.1/OMIW190G074126.1/OAUW26G037624.1/OOFW323G036760.1/OPUW363G073614.1/OPUW363G070300.1/ORHW375G037085.1/OBRW59G024371.1/OBRW59G06970.1/OGLW97G0038436.1/OMEM6G04471.1/OGRW100G09677.1/OLAW128G03658.1/OALW18G03833.1/OOFW323G04408.1/OPUW363G09713.1/OPUW363G04020.1/ORHW375G04071.1/OBRW59G04033.1/OEIW71G04363.…	26
GO:0051169	nuclear transport	40/190905	48/383722	1.40323e-06	5.95966e-06	2.42541e-06	OMEM6G02098.1/OGRW100G046334.1/OGRW100G01477.1/OLAW128G07005.1/OLAW128G01339.1/OMAW171G01419.1/OMAW171G07323.1/OALW18G049852.1/OALW18G01486.1/OMIW190G01401.1/OMIW190G07294.1/OAUW26G01537.1/OOFW323G01919.1/OPUW363G07259.1/OPUW363G01477.1/ORHW375G01576.1/OBRW59G01813.1/OEIW71G01817.1/OGLW97G0014146.1/OGLW97G001693.1/OMEM6G036123.1/OGRW100G071626.1/OGRW100G069474.1/OLAW128G070066.1/OLAW128G072297.1/…	40
GO:0007131	reciprocal meiotic recombination	92/190905	131/383722	1.57577e-06	6.67217e-06	2.71539e-06	OMEM6G037445.1/OGRW100G072987.1/OGRW100G075508.1/OLAW128G073455.1/OMAW171G077928.1/OALW18G073928.1/OALW18G076598.1/OMIW190G078381.1/OMIW190G075444.1/OOFW323G038929.1/OPUW363G074907.1/ORHW375G039310.1/OEIW71G039399.1/OGLW97G0039711.1/OGLW97G0042918.1/OLAW128G080992.1/OMAW171G080714.1/OMIW190G083721.1/OMIW190G081090.1/OAUW26G038912.1/OPUW363G080561.1/OPUW363G083172.1/OGRW100G024797.1/OGRW100G028488…	92
GO:0009785	blue light signaling pathway	75/190905	103/383722	1.57825e-06	6.67217e-06	2.71539e-06	OMEM6G08838.1/OGRW100G013843.1/OGRW100G018625.1/OLAW128G013970.1/OLAW128G018586.1/OMAW171G018560.1/OMAW171G013844.1/OALW18G019041.1/OALW18G014229.1/OMIW190G013967.1/OMIW190G018739.1/OAUW26G08688.1/OOFW323G09252.1/OPUW363G013601.1/OPUW363G018392.1/ORHW375G08194.1/OBRW59G07846.1/OEIW71G08456.1/OGLW97G008486.1/OMEM6G09227.1/OGRW100G014476.1/OGRW100G019288.1/OLAW128G014686.1/OLAW128G019254.1/OMAW171G…	75
GO:0004345	glucose-6-phosphate dehydrogenase activity	76/190905	105/383722	1.97903e-06	8.29028e-06	3.37391e-06	OMEM6G014709.1/OGRW100G022846.1/OGRW100G026736.1/OLAW128G027560.1/OLAW128G022702.1/OMAW171G027926.1/OMAW171G022817.1/OALW18G023230.1/OALW18G027311.1/OMIW190G023016.1/OMIW190G028014.1/OAUW26G013057.1/OOFW323G013469.1/OPUW363G022710.1/OPUW363G027591.1/ORHW375G012668.1/OBRW59G011775.1/OEIW71G012794.1/OGLW97G0012611.1/OMEM6G015360.1/OGRW100G023494.1/OGRW100G027387.1/OLAW128G028279.1/OLAW128G023319.1/…	76
GO:0004351	glutamate decarboxylase activity	76/190905	105/383722	1.97903e-06	8.29028e-06	3.37391e-06	OMEM6G011829.1/OGRW100G024904.1/OGRW100G028581.1/OLAW128G029675.1/OLAW128G024601.1/OMAW171G029888.1/OMAW171G024862.1/OALW18G025399.1/OALW18G029230.1/OMIW190G025019.1/OMIW190G030101.1/OAUW26G015299.1/OOFW323G015436.1/OPUW363G024657.1/OPUW363G029537.1/ORHW375G014907.1/OBRW59G013475.1/OEIW71G015234.1/OGLW97G0014900.1/OMEM6G017160.1/OGRW100G034424.1/OGRW100G031156.1/OLAW128G032565.1/OLAW128G036026.1/…	76
GO:0006536	glutamate metabolic process	76/190905	105/383722	1.97903e-06	8.29028e-06	3.37391e-06	OMEM6G011829.1/OGRW100G024904.1/OGRW100G028581.1/OLAW128G029675.1/OLAW128G024601.1/OMAW171G029888.1/OMAW171G024862.1/OALW18G025399.1/OALW18G029230.1/OMIW190G025019.1/OMIW190G030101.1/OAUW26G015299.1/OOFW323G015436.1/OPUW363G024657.1/OPUW363G029537.1/ORHW375G014907.1/OBRW59G013475.1/OEIW71G015234.1/OGLW97G0014900.1/OMEM6G017160.1/OGRW100G034424.1/OGRW100G031156.1/OLAW128G032565.1/OLAW128G036026.1/…	76
GO:0007142	male meiosis II	76/190905	105/383722	1.97903e-06	8.29028e-06	3.37391e-06	OMEM6G06925.1/OGRW100G012155.1/OGRW100G016665.1/OLAW128G012266.1/OLAW128G016969.1/OMAW171G016837.1/OMAW171G012213.1/OALW18G017489.1/OALW18G012588.1/OMIW190G012234.1/OMIW190G017101.1/OAUW26G06766.1/OOFW323G07573.1/OPUW363G012112.1/OPUW363G016772.1/ORHW375G06555.1/OBRW59G06358.1/OEIW71G06731.1/OGLW97G006814.1/OMEM6G012265.1/OGRW100G025371.1/OGRW100G029010.1/OLAW128G030186.1/OLAW128G025028.1/OMAW171…	76
GO:0005732	small nucleolar ribonucleoprotein complex	63/190905	84/383722	1.99921e-06	8.3558e-06	3.40057e-06	OMEM6G037383.1/OMEM6G039945.1/OGRW100G072904.1/OGRW100G077805.1/OGRW100G080128.1/OLAW128G075791.1/OLAW128G080899.1/OLAW128G073390.1/OLAW128G078662.1/OMAW171G077846.1/OMAW171G080656.1/OMAW171G075002.1/OMAW171G083142.1/OALW18G073847.1/OALW18G079052.1/OALW18G081477.1/OMIW190G078295.1/OMIW190G083656.1/OMIW190G075366.1/OMIW190G081004.1/OAUW26G038853.1/OAUW26G041195.1/OOFW323G038858.1/OOFW323G041966.1/…	63
GO:1990879	CST complex	28/190905	31/383722	2.04773e-06	8.53919e-06	3.47521e-06	OMEM6G026483.1/OGRW100G051448.1/OGRW100G078283.1/OGRW100G055144.1/OLAW128G052100.1/OLAW128G081519.1/OLAW128G055500.1/OMAW171G055922.1/OMAW171G052551.1/OMAW171G083710.1/OALW18G051855.1/OALW18G079552.1/OALW18G055495.1/OMIW190G052907.1/OMIW190G056207.1/OMIW190G081611.1/OAUW26G027822.1/OOFW323G027719.1/OOFW323G042584.1/OPUW363G055681.1/OPUW363G052372.1/OPUW363G083673.1/ORHW375G027777.1/ORHW375G043002…	28
GO:0016818	hydrolase activity, acting on acid anhydrides, in phosphorus-containing anhydrides	150/190905	231/383722	2.29838e-06	9.56272e-06	3.89176e-06	OMEM6G01405.1/OGRW100G07674.1/OGRW100G01924.1/OLAW128G07536.1/OLAW128G01793.1/OMAW171G01948.1/OMAW171G07832.1/OALW18G07874.1/OALW18G01950.1/OMIW190G01940.1/OMIW190G07825.1/OAUW26G02147.1/OOFW323G02450.1/OPUW363G07787.1/OPUW363G02051.1/ORHW375G02137.1/OBRW59G02266.1/OEIW71G02380.1/OGLW97G002268.1/OMEM6G019515.1/OGRW100G036882.1/OGRW100G040511.1/OLAW128G041718.1/OLAW128G038354.1/OMAW171G042220.1/OM…	150
GO:0006506	GPI anchor biosynthetic process	250/190905	409/383722	2.43375e-06	1.01031e-05	4.11167e-06	OMEM6G015136.1/OGRW100G023268.1/OGRW100G027159.1/OLAW128G028036.1/OLAW128G023123.1/OMAW171G028358.1/OMAW171G023258.1/OALW18G023678.1/OALW18G027761.1/OMIW190G023440.1/OMIW190G028473.1/OAUW26G013509.1/OOFW323G013901.1/OPUW363G023056.1/OPUW363G028035.1/ORHW375G013157.1/OBRW59G012178.1/OEIW71G013239.1/OGLW97G0013116.1/OMEM6G019693.1/OGRW100G037068.1/OGRW100G047239.1/OGRW100G040680.1/OLAW128G041930.1/…	250
GO:0015629	actin cytoskeleton	195/190905	311/383722	2.88296e-06	1.19409e-05	4.85962e-06	OGRW100G029018.1/OLAW128G025039.1/OALW18G029682.1/OMEM6G012280.1/OMEM6G041869.1/OGRW100G025390.1/OGRW100G079753.1/OGRW100G081869.1/OLAW128G030209.1/OLAW128G083034.1/OLAW128G080465.1/OMAW171G030377.1/OMAW171G082700.1/OMAW171G025361.1/OALW18G025891.1/OALW18G081097.1/OALW18G083342.1/OMIW190G025481.1/OMIW190G085733.1/OMIW190G085734.1/OMIW190G030618.1/OMIW190G083249.1/OAUW26G015762.1/OAUW26G043338.1/O…	195
GO:0005794	Golgi apparatus	130/190905	197/383722	3.03696e-06	1.25505e-05	5.10769e-06	OMEM6G010579.1/OMEM6G023262.1/OGRW100G043937.1/OGRW100G020768.1/OGRW100G048289.1/OLAW128G016177.1/OLAW128G045472.1/OLAW128G020643.1/OLAW128G048952.1/OMAW171G045728.1/OMAW171G049197.1/OALW18G047440.1/OALW18G016408.1/OALW18G044212.1/OMIW190G046056.1/OMIW190G049558.1/OAUW26G010927.1/OAUW26G024341.1/OOFW323G011368.1/OOFW323G024206.1/OPUW363G048897.1/OPUW363G020606.1/OPUW363G045497.1/ORHW375G010461.1/…	130
GO:0004642	phosphoribosylformylglycinamidine synthase activity	32/190905	37/383722	3.23648e-06	1.3345e-05	5.43105e-06	OMEM6G05557.1/OGRW100G010751.1/OGRW100G036562.1/OGRW100G04765.1/OLAW128G010707.1/OLAW128G041341.1/OLAW128G038043.1/OLAW128G04690.1/OMAW171G041894.1/OMAW171G04957.1/OMAW171G010833.1/OMAW171G038427.1/OALW18G010969.1/OALW18G040339.1/OALW18G04854.1/OMIW190G042179.1/OMIW190G04955.1/OMIW190G010945.1/OAUW26G05308.1/OOFW323G020148.1/OOFW323G05439.1/OPUW363G010753.1/OPUW363G038054.1/OPUW363G041483.1/OPUW3…	32
GO:0006338	chromatin remodeling	179/190905	283/383722	3.26766e-06	1.34434e-05	5.4711e-06	OMEM6G021924.1/OMEM6G029440.1/OGRW100G058476.1/OGRW100G061276.1/OLAW128G061223.1/OLAW128G058616.1/OMAW171G062423.1/OMAW171G059480.1/OALW18G058907.1/OALW18G061781.1/OMIW190G059731.1/OMIW190G062736.1/OAUW26G031386.1/OOFW323G030721.1/OOFW323G031416.1/OPUW363G062148.1/OPUW363G058603.1/OPUW363G059257.1/ORHW375G031506.1/OBRW59G026524.1/OEIW71G031608.1/OGLW97G0031632.1/OMEM6G022194.1/OMEM6G022214.1/OMEM…	179
GO:0047334	diphosphate-fructose-6-phosphate 1-phosphotransFtrase activity	73/190905	101/383722	3.41796e-06	1.40304e-05	5.70998e-06	OMEM6G024323.1/OMEM6G09876.1/OGRW100G015148.1/OGRW100G044907.1/OGRW100G019972.1/OGRW100G049213.1/OLAW128G015385.1/OLAW128G046527.1/OLAW128G019549.1/OLAW128G049886.1/OMAW171G019952.1/OMAW171G046740.1/OMAW171G050207.1/OALW18G020374.1/OALW18G048427.1/OALW18G015601.1/OMIW190G015327.1/OMIW190G047064.1/OMIW190G050581.1/OAUW26G010126.1/OAUW26G025437.1/OOFW323G010644.1/OOFW323G025248.1/OPUW363G015189.1/O…	73
GO:0008935	1,4-dihydroxy-2-naphthoyl-CoA synthase activity	40/190905	49/383722	3.95133e-06	1.61701e-05	6.58078e-06	OMEM6G03753.1/OGRW100G046400.1/OGRW100G08919.1/OGRW100G03057.1/OLAW128G026665.1/OLAW128G06940.1/OLAW128G08815.1/OLAW128G02951.1/OMAW171G03133.1/OMAW171G021926.1/OMAW171G07261.1/OMAW171G08963.1/OALW18G022321.1/OALW18G049918.1/OALW18G09125.1/OALW18G03106.1/OMIW190G03144.1/OMIW190G027120.1/OMIW190G07230.1/OMIW190G081954.1/OMIW190G08964.1/OAUW26G03393.1/OOFW323G012609.1/OOFW323G01864.1/OOFW323G03638.…	40
GO:0004525	ribonuclease III activity	152/190905	236/383722	3.95891e-06	1.61701e-05	6.58078e-06	OMEM6G020273.1/OMEM6G03043.1/OGRW100G037648.1/OGRW100G08188.1/OGRW100G041216.1/OGRW100G041224.1/OLAW128G042490.1/OLAW128G08050.1/OLAW128G038946.1/OMAW171G02406.1/OMAW171G042920.1/OMAW171G039563.1/OMAW171G08303.1/OALW18G037854.1/OALW18G08408.1/OALW18G041376.1/OALW18G041388.1/OMIW190G02375.1/OMIW190G043221.1/OMIW190G039857.1/OMIW190G08278.1/OAUW26G021325.1/OOFW323G021246.1/OOFW323G02913.1/OPUW363G0…	152
GO:0000082	G1/S transition of mitotic cell cycle	38/190905	46/383722	3.96559e-06	1.61701e-05	6.58078e-06	OMEM6G032043.1/OGRW100G060425.1/OGRW100G063057.1/OLAW128G063270.1/OLAW128G060250.1/OMAW171G064469.1/OMAW171G061465.1/OALW18G060930.1/OALW18G063554.1/OMIW190G061808.1/OMIW190G064776.1/OAUW26G033369.1/OOFW323G033446.1/OPUW363G064170.1/OPUW363G061242.1/ORHW375G033528.1/OBRW59G028680.1/OEIW71G033706.1/OGLW97G0033883.1/OMEM6G038781.1/OGRW100G074426.1/OGRW100G076735.1/OLAW128G077376.1/OLAW128G074723.1/…	38
GO:0003979	UDP-glucose 6-dehydrogenase activity	101/190905	148/383722	4.02652e-06	1.63822e-05	6.6671e-06	OMEM6G011094.1/OMEM6G012096.1/OMEM6G015488.1/OMEM6G040998.1/OMEM6G040999.1/OMEM6G08857.1/OGRW100G013877.1/OGRW100G024104.1/OGRW100G025221.1/OGRW100G078758.1/OGRW100G078760.1/OGRW100G027466.1/OGRW100G028863.1/OGRW100G080776.1/OGRW100G080778.1/OLAW128G014005.1/OLAW128G028790.1/OLAW128G030018.1/OLAW128G082012.1/OLAW128G024874.1/OLAW128G079572.1/OLAW128G079573.1/OMAW171G018584.1/OMAW171G028695.1/OMAW…	101
GO:0009408	response to heat	178/190905	282/383722	4.18376e-06	1.69844e-05	6.91217e-06	OMEM6G09428.1/OGRW100G019499.1/OLAW128G014905.1/OLAW128G019470.1/OMAW171G014758.1/OALW18G019941.1/OALW18G015125.1/OMIW190G014893.1/OMIW190G019697.1/OAUW26G09643.1/OOFW323G010175.1/OPUW363G019338.1/ORHW375G09201.1/OBRW59G08629.1/OEIW71G09379.1/OGLW97G009148.1/OGRW100G014713.1/OGRW100G031940.1/OLAW128G033415.1/OLAW128G036821.1/OMAW171G019496.1/OMAW171G037119.1/OALW18G035916.1/OMIW190G037490.1/OAUW2…	178
GO:0004360	glutamine-fructose-6-phosphate transaminase (isomerizing) activity	21/190905	22/383722	4.95751e-06	2.00371e-05	8.15451e-06	OMEM6G037364.1/OMEM6G039928.1/OGRW100G075424.1/OGRW100G080102.1/OLAW128G075748.1/OLAW128G073373.1/OLAW128G078639.1/OMAW171G074980.1/OALW18G073820.1/OALW18G076515.1/OALW18G081453.1/OMIW190G075345.1/OAUW26G038833.1/OAUW26G041176.1/OOFW323G038834.1/OPUW363G077540.1/OBRW59G033555.1/OBRW59G035916.1/OEIW71G039298.1/OGLW97G0039596.1/OGLW97G0042816.1	21
GO:1901137	carbohydrate derivative biosynthetic process	21/190905	22/383722	4.95751e-06	2.00371e-05	8.15451e-06	OMEM6G037364.1/OMEM6G039928.1/OGRW100G075424.1/OGRW100G080102.1/OLAW128G075748.1/OLAW128G073373.1/OLAW128G078639.1/OMAW171G074980.1/OALW18G073820.1/OALW18G076515.1/OALW18G081453.1/OMIW190G075345.1/OAUW26G038833.1/OAUW26G041176.1/OOFW323G038834.1/OPUW363G077540.1/OBRW59G033555.1/OBRW59G035916.1/OEIW71G039298.1/OGLW97G0039596.1/OGLW97G0042816.1	21
GO:0006605	protein targeting	75/190905	105/383722	5.20384e-06	2.09865e-05	8.54092e-06	OMEM6G025660.1/OMEM6G07023.1/OGRW100G012247.1/OGRW100G046153.1/OGRW100G016747.1/OGRW100G050383.1/OLAW128G012379.1/OLAW128G047793.1/OLAW128G017055.1/OLAW128G050988.1/OMAW171G016933.1/OMAW171G048022.1/OMAW171G012305.1/OALW18G017401.1/OALW18G049664.1/OALW18G012679.1/OALW18G046277.1/OMIW190G012342.1/OMIW190G048369.1/OMIW190G017198.1/OMIW190G051805.1/OAUW26G026793.1/OAUW26G06859.1/OOFW323G026478.1/OOF…	75
GO:0005852	eukaryotic translation initiation factor 3 complex	261/190905	432/383722	5.35581e-06	2.15495e-05	8.77006e-06	OMEM6G031319.1/OMEM6G06563.1/OGRW100G011792.1/OGRW100G051209.1/OGRW100G016295.1/OGRW100G054941.1/OLAW128G011869.1/OLAW128G051829.1/OLAW128G016624.1/OLAW128G055299.1/OMAW171G016467.1/OMAW171G055665.1/OMAW171G011818.1/OMAW171G052298.1/OALW18G016998.1/OALW18G051608.1/OALW18G012214.1/OALW18G055296.1/OMIW190G011861.1/OMIW190G052660.1/OMIW190G055989.1/OAUW26G027616.1/OAUW26G06420.1/OOFW323G027458.1/OOF…	261
GO:0010277	chlorophyllide a oxygenase [overall] activity	87/190905	125/383722	5.36688e-06	2.15495e-05	8.77006e-06	OMEM6G012515.1/OMEM6G012518.1/OMEM6G012522.1/OMEM6G012525.1/OGRW100G025623.1/OGRW100G029250.1/OGRW100G029255.1/OLAW128G030434.1/OLAW128G025256.1/OLAW128G025257.1/OLAW128G025262.1/OMAW171G030546.1/OMAW171G030547.1/OMAW171G025598.1/OALW18G026139.1/OALW18G026142.1/OALW18G029892.1/OALW18G029895.1/OMIW190G025720.1/OMIW190G025722.1/OMIW190G030834.1/OMIW190G030838.1/OAUW26G015993.1/OAUW26G015999.1/OAUW2…	87
GO:0006384	transcription initiation from RNA polymerase III promoter	84/190905	120/383722	5.40921e-06	2.16722e-05	8.81997e-06	OMEM6G023516.1/OMEM6G09275.1/OGRW100G014523.1/OGRW100G039908.1/OGRW100G019336.1/OGRW100G043185.1/OLAW128G014739.1/OLAW128G044671.1/OLAW128G019302.1/OLAW128G040983.1/OMAW171G018109.1/OMAW171G019327.1/OMAW171G044976.1/OMAW171G014590.1/OMAW171G041597.1/OALW18G019749.1/OALW18G040044.1/OALW18G040046.1/OALW18G014974.1/OALW18G043447.1/OMIW190G013512.1/OMIW190G013515.1/OMIW190G045323.1/OMIW190G045324.1/O…	84
GO:0006807	nitrogen compound metabolic process	286/190905	478/383722	5.99014e-06	2.39476e-05	9.74598e-06	OMEM6G010051.1/OMEM6G013940.1/OGRW100G015307.1/OGRW100G022104.1/OGRW100G06620.1/OGRW100G020168.1/OLAW128G015570.1/OLAW128G026780.1/OLAW128G020072.1/OLAW128G021960.1/OMAW171G020151.1/OMAW171G027139.1/OMAW171G015385.1/OMAW171G022046.1/OALW18G020557.1/OALW18G022441.1/OALW18G06776.1/OALW18G015807.1/OMIW190G015519.1/OMIW190G022251.1/OMIW190G020349.1/OMIW190G027232.1/OAUW26G010327.1/OAUW26G012250.1/OOF…	286
GO:1990904	ribonucleoprotein complex	212/190905	344/383722	6.17106e-06	2.45752e-05	1.00014e-05	OMEM6G030764.1/OMEM6G034190.1/OMEM6G05864.1/OGRW100G011080.1/OGRW100G059140.1/OGRW100G065226.1/OGRW100G05056.1/OGRW100G061884.1/OGRW100G067551.1/OLAW128G011030.1/OLAW128G061746.1/OLAW128G067732.1/OLAW128G04982.1/OLAW128G059112.1/OLAW128G065240.1/OMAW171G05280.1/OMAW171G063095.1/OMAW171G066738.1/OMAW171G011136.1/OMAW171G060124.1/OMAW171G069100.1/OALW18G011287.1/OALW18G059607.1/OALW18G068203.1/OALW…	212
GO:0070897	DNA-templated transcriptional preinitiation complex assembly	137/190905	211/383722	6.17387e-06	2.45752e-05	1.00014e-05	OMEM6G013721.1/OMEM6G022275.1/OGRW100G021867.1/OGRW100G039690.1/OGRW100G06387.1/OGRW100G042990.1/OLAW128G026540.1/OLAW128G044439.1/OLAW128G021718.1/OLAW128G040780.1/OMAW171G026893.1/OMAW171G044769.1/OMAW171G021813.1/OMAW171G041384.1/OALW18G039816.1/OALW18G06539.1/OALW18G043232.1/OALW18G043233.1/OALW18G043234.1/OALW18G043235.1/OALW18G043236.1/OALW18G043237.1/OALW18G043238.1/OALW18G043239.1/OALW18G…	137
GO:0061657	UFM1 conjugating enzyme activity	26/190905	29/383722	6.77861e-06	2.69241e-05	1.09573e-05	OMEM6G035203.1/OGRW100G070470.1/OGRW100G080749.1/OLAW128G068697.1/OLAW128G020437.1/OLAW128G079288.1/OMAW171G04685.1/OMAW171G072896.1/OMAW171G070419.1/OALW18G069073.1/OALW18G071708.1/OALW18G082140.1/OMIW190G073261.1/OMIW190G070801.1/OAUW26G036582.1/OOFW323G036650.1/OPUW363G072758.1/OPUW363G04805.1/OPUW363G070251.1/ORHW375G036651.1/ORHW375G036988.1/OBRW59G031698.1/OBRW59G033630.1/OBRW59G035975.1/OE…	26
GO:0016114	terpenoid biosynthetic process	95/190905	139/383722	6.95522e-06	2.75661e-05	1.12186e-05	OMEM6G04824.1/OGRW100G010048.1/OGRW100G04089.1/OLAW128G09981.1/OLAW128G04007.1/OMAW171G04246.1/OMAW171G010121.1/OALW18G010248.1/OALW18G04157.1/OMIW190G04185.1/OMIW190G010227.1/OAUW26G04571.1/OOFW323G04765.1/OPUW363G010051.1/OPUW363G04383.1/ORHW375G04424.1/OBRW59G04315.1/OEIW71G04697.1/OGLW97G004751.1/OMEM6G09624.1/OGRW100G014906.1/OGRW100G019693.1/OLAW128G015104.1/OLAW128G019808.1/OMAW171G019695.…	95
GO:0009737	response to abscisic acid	116/190905	175/383722	7.28616e-06	2.88156e-05	1.17271e-05	OMEM6G01268.1/OGRW100G047422.1/OGRW100G0461.1/OLAW128G05884.1/OLAW128G0352.1/OMAW171G02006.1/OMAW171G0346.1/OMAW171G06223.1/OALW18G050960.1/OALW18G0401.1/OMIW190G0338.1/OMIW190G06185.1/OAUW26G0419.1/OOFW323G0805.1/OPUW363G06191.1/OPUW363G07851.1/OPUW363G0393.1/ORHW375G0509.1/OBRW59G0889.1/OEIW71G0725.1/OGLW97G0014553.1/OMEM6G031498.1/OGRW100G059886.1/OGRW100G062560.1/OLAW128G062690.1/OLAW128G0597…	116
GO:0003855	3-dehydroquinate dehydratase activity	46/190905	59/383722	8.08512e-06	3.19067e-05	1.29851e-05	OMEM6G02550.1/OGRW100G07716.1/OGRW100G07721.1/OGRW100G01962.1/OLAW128G07594.1/OLAW128G07600.1/OLAW128G01834.1/OMAW171G01998.1/OMAW171G07888.1/OALW18G07927.1/OALW18G07931.1/OALW18G01989.1/OALW18G01990.1/OMIW190G01986.1/OMIW190G07879.1/OAUW26G02204.1/OAUW26G02207.1/OOFW323G02510.1/OPUW363G07840.1/OPUW363G02113.1/OPUW363G02116.1/ORHW375G02206.1/OBRW59G02325.1/OEIW71G02444.1/OGLW97G002350.1/OGLW97G00…	46
GO:0004474	malate synthase activity	23/190905	25/383722	8.73554e-06	3.41075e-05	1.38808e-05	OMEM6G017472.1/OGRW100G034766.1/OGRW100G031468.1/OGRW100G041884.1/OLAW128G032906.1/OLAW128G036348.1/OMAW171G036634.1/OMAW171G04082.1/OMAW171G032889.1/OALW18G031743.1/OALW18G035414.1/OALW18G042064.1/OMIW190G036987.1/OMIW190G04084.1/OMIW190G033272.1/OAUW26G018459.1/OOFW323G018293.1/OPUW363G036278.1/OPUW363G032561.1/ORHW375G018245.1/OBRW59G016219.1/OEIW71G018500.1/OGLW97G0018146.1	23
GO:0004668	protein-arginine deiminase activity	23/190905	25/383722	8.73554e-06	3.41075e-05	1.38808e-05	OMEM6G017321.1/OGRW100G034600.1/OGRW100G05749.1/OGRW100G031326.1/OLAW128G032741.1/OLAW128G021091.1/OLAW128G036195.1/OMAW171G036482.1/OMAW171G032724.1/OMAW171G032725.1/OALW18G031595.1/OALW18G05872.1/OALW18G035272.1/OMIW190G036841.1/OMIW190G033129.1/OAUW26G018306.1/OOFW323G018136.1/OPUW363G036131.1/OPUW363G032425.1/ORHW375G018078.1/OBRW59G016080.1/OEIW71G018345.1/OGLW97G0017991.1	23
GO:0006097	glyoxylate cycle	23/190905	25/383722	8.73554e-06	3.41075e-05	1.38808e-05	OMEM6G017472.1/OGRW100G034766.1/OGRW100G031468.1/OGRW100G041884.1/OLAW128G032906.1/OLAW128G036348.1/OMAW171G036634.1/OMAW171G04082.1/OMAW171G032889.1/OALW18G031743.1/OALW18G035414.1/OALW18G042064.1/OMIW190G036987.1/OMIW190G04084.1/OMIW190G033272.1/OAUW26G018459.1/OOFW323G018293.1/OPUW363G036278.1/OPUW363G032561.1/ORHW375G018245.1/OBRW59G016219.1/OEIW71G018500.1/OGLW97G0018146.1	23
GO:0009446	putrescine biosynthetic process	23/190905	25/383722	8.73554e-06	3.41075e-05	1.38808e-05	OMEM6G017321.1/OGRW100G034600.1/OGRW100G05749.1/OGRW100G031326.1/OLAW128G032741.1/OLAW128G021091.1/OLAW128G036195.1/OMAW171G036482.1/OMAW171G032724.1/OMAW171G032725.1/OALW18G031595.1/OALW18G05872.1/OALW18G035272.1/OMIW190G036841.1/OMIW190G033129.1/OAUW26G018306.1/OOFW323G018136.1/OPUW363G036131.1/OPUW363G032425.1/ORHW375G018078.1/OBRW59G016080.1/OEIW71G018345.1/OGLW97G0017991.1	23
GO:0061666	UFM1 ligase activity	23/190905	25/383722	8.73554e-06	3.41075e-05	1.38808e-05	OMEM6G019304.1/OGRW100G036668.1/OGRW100G040303.1/OLAW128G041472.1/OLAW128G038149.1/OMAW171G042010.1/OMAW171G012076.1/OMAW171G038534.1/OALW18G036832.1/OALW18G040442.1/OMIW190G042291.1/OMIW190G016935.1/OMIW190G038896.1/OAUW26G020375.1/OOFW323G020267.1/OOFW323G07430.1/OPUW363G038156.1/OPUW363G041604.1/ORHW375G020272.1/OBRW59G017868.1/OEIW71G020416.1/OEIW71G06580.1/OGLW97G0019863.1	23
GO:0004815	aspartate-tRNA ligase activity	40/190905	50/383722	1.02258e-05	3.97574e-05	1.61802e-05	OMEM6G032431.1/OMEM6G06727.1/OGRW100G011937.1/OGRW100G014945.1/OGRW100G016472.1/OGRW100G019734.1/OLAW128G012027.1/OLAW128G015147.1/OLAW128G016782.1/OLAW128G019765.1/OMAW171G016634.1/OMAW171G019731.1/OMAW171G011985.1/OMAW171G014978.1/OALW18G017143.1/OALW18G020172.1/OALW18G012382.1/OALW18G015351.1/OMIW190G012016.1/OMIW190G015110.1/OMIW190G016831.1/OMIW190G019933.1/OAUW26G038532.1/OAUW26G06570.1/OAU…	40
GO:0006422	aspartyl-tRNA aminoacylation	40/190905	50/383722	1.02258e-05	3.97574e-05	1.61802e-05	OMEM6G032431.1/OMEM6G06727.1/OGRW100G011937.1/OGRW100G014945.1/OGRW100G016472.1/OGRW100G019734.1/OLAW128G012027.1/OLAW128G015147.1/OLAW128G016782.1/OLAW128G019765.1/OMAW171G016634.1/OMAW171G019731.1/OMAW171G011985.1/OMAW171G014978.1/OALW18G017143.1/OALW18G020172.1/OALW18G012382.1/OALW18G015351.1/OMIW190G012016.1/OMIW190G015110.1/OMIW190G016831.1/OMIW190G019933.1/OAUW26G038532.1/OAUW26G06570.1/OAU…	40
GO:0006415	translational termination	151/190905	237/383722	1.02523e-05	3.97763e-05	1.61878e-05	OMEM6G011689.1/OMEM6G039716.1/OGRW100G011207.1/OGRW100G024748.1/OGRW100G053533.1/OGRW100G028447.1/OGRW100G057018.1/OLAW128G011169.1/OLAW128G029502.1/OLAW128G054268.1/OLAW128G024459.1/OLAW128G057276.1/OMAW171G029746.1/OMAW171G05410.1/OMAW171G058009.1/OMAW171G011266.1/OMAW171G024700.1/OMAW171G054527.1/OALW18G011420.1/OALW18G025227.1/OALW18G053875.1/OALW18G029103.1/OALW18G057398.1/OMIW190G024888.1/O…	151
GO:0016627	oxidoreductase activity, acting on the CH-CH group of donors	254/190905	422/383722	1.04286e-05	4.03752e-05	1.64315e-05	OMEM6G01388.1/OMEM6G019669.1/OMEM6G024633.1/OGRW100G037055.1/OGRW100G045280.1/OGRW100G047295.1/OGRW100G040664.1/OGRW100G049450.1/OGRW100G0574.1/OGRW100G0598.1/OLAW128G041913.1/OLAW128G046668.1/OLAW128G06014.1/OLAW128G038490.1/OLAW128G0467.1/OLAW128G0496.1/OLAW128G050148.1/OMAW171G042373.1/OMAW171G047061.1/OMAW171G047065.1/OMAW171G0479.1/OMAW171G038958.1/OMAW171G050447.1/OMAW171G050448.1/OMAW171G0…	254
GO:0048193	Golgi vesicle transport	160/190905	253/383722	1.05752e-05	4.08566e-05	1.66275e-05	OGRW100G073159.1/OLAW128G076020.1/OMAW171G075233.1/OALW18G074110.1/OMIW190G078546.1/OOFW323G039084.1/ORHW375G039480.1/OGLW97G0039885.1/OMEM6G032707.1/OGRW100G052213.1/OGRW100G063667.1/OGRW100G066117.1/OLAW128G066107.1/OLAW128G063786.1/OMAW171G056709.1/OMAW171G065078.1/OMAW171G053249.1/OALW18G052617.1/OALW18G066634.1/OALW18G064122.1/OMIW190G053690.1/OMIW190G067973.1/OMIW190G056956.1/OMIW190G065311…	160
GO:0009538	photosystem I reaction center	76/190905	108/383722	1.09721e-05	4.23012e-05	1.72154e-05	OMEM6G012271.1/OGRW100G025378.1/OGRW100G029015.1/OLAW128G030193.1/OLAW128G025033.1/OMAW171G030357.1/OMAW171G025348.1/OALW18G025881.1/OALW18G029674.1/OMIW190G025464.1/OMIW190G030603.1/OAUW26G015752.1/OOFW323G015918.1/OPUW363G025115.1/OPUW363G030019.1/ORHW375G015408.1/OBRW59G013897.1/OEIW71G015737.1/OGLW97G0015400.1/OMEM6G012535.1/OGRW100G025637.1/OGRW100G029270.1/OLAW128G030448.1/OLAW128G025280.1/…	76
GO:0004347	glucose-6-phosphate isomerase activity	62/190905	85/383722	1.13155e-05	4.3534e-05	1.77171e-05	OMEM6G023958.1/OGRW100G025359.1/OGRW100G029001.1/OGRW100G048895.1/OLAW128G030174.1/OLAW128G025017.1/OMAW171G030336.1/OMAW171G025327.1/OMAW171G049825.1/OALW18G025860.1/OALW18G029658.1/OALW18G044823.1/OMIW190G025446.1/OMIW190G030582.1/OMIW190G050190.1/OAUW26G015730.1/OOFW323G015899.1/OPUW363G025096.1/OPUW363G030002.1/ORHW375G015388.1/OBRW59G013882.1/OEIW71G015716.1/OGLW97G0015381.1/OGLW97G0024883.1…	62
GO:0006809	nitric oxide biosynthetic process	25/190905	28/383722	1.22694e-05	4.68122e-05	1.90512e-05	OMEM6G031500.1/OGRW100G059889.1/OGRW100G062563.1/OLAW128G062694.1/OLAW128G020361.1/OLAW128G059781.1/OMAW171G020445.1/OMAW171G063886.1/OMAW171G060915.1/OALW18G020769.1/OALW18G060380.1/OALW18G063043.1/OMIW190G015813.1/OMIW190G064230.1/OAUW26G032842.1/OOFW323G011073.1/OOFW323G032917.1/OPUW363G063632.1/OPUW363G060689.1/ORHW375G032979.1/OBRW59G028227.1/OEIW71G033141.1/OGLW97G0010155.1/OGLW97G0033314.1…	25
GO:0042128	nitrate assimilation	25/190905	28/383722	1.22694e-05	4.68122e-05	1.90512e-05	OMEM6G031500.1/OGRW100G059889.1/OGRW100G062563.1/OLAW128G062694.1/OLAW128G020361.1/OLAW128G059781.1/OMAW171G020445.1/OMAW171G063886.1/OMAW171G060915.1/OALW18G020769.1/OALW18G060380.1/OALW18G063043.1/OMIW190G015813.1/OMIW190G064230.1/OAUW26G032842.1/OOFW323G011073.1/OOFW323G032917.1/OPUW363G063632.1/OPUW363G060689.1/ORHW375G032979.1/OBRW59G028227.1/OEIW71G033141.1/OGLW97G0010155.1/OGLW97G0033314.1…	25
GO:0043461	proton-transporting ATP synthase complex assembly	25/190905	28/383722	1.22694e-05	4.68122e-05	1.90512e-05	OMEM6G029002.1/OGRW100G053961.1/OGRW100G077911.1/OGRW100G057425.1/OLAW128G054710.1/OLAW128G081027.1/OLAW128G057678.1/OMAW171G058414.1/OMAW171G055008.1/OALW18G054289.1/OALW18G057815.1/OMIW190G055369.1/OMIW190G058644.1/OAUW26G01128.1/OAUW26G030420.1/OOFW323G030154.1/OPUW363G058208.1/OPUW363G054788.1/OPUW363G083212.1/ORHW375G030301.1/ORHW375G042515.1/OBRW59G026158.1/OEIW71G030466.1/OEIW71G042538.1/O…	25
GO:0050464	nitrate reductase (NADPH) activity	25/190905	28/383722	1.22694e-05	4.68122e-05	1.90512e-05	OMEM6G031500.1/OGRW100G059889.1/OGRW100G062563.1/OLAW128G062694.1/OLAW128G020361.1/OLAW128G059781.1/OMAW171G020445.1/OMAW171G063886.1/OMAW171G060915.1/OALW18G020769.1/OALW18G060380.1/OALW18G063043.1/OMIW190G015813.1/OMIW190G064230.1/OAUW26G032842.1/OOFW323G011073.1/OOFW323G032917.1/OPUW363G063632.1/OPUW363G060689.1/ORHW375G032979.1/OBRW59G028227.1/OEIW71G033141.1/OGLW97G0010155.1/OGLW97G0033314.1…	25
GO:0009881	photoreceptor activity	66/190905	92/383722	1.48997e-05	5.67298e-05	2.30874e-05	OMEM6G017066.1/OMEM6G08965.1/OGRW100G034331.1/OGRW100G018772.1/OGRW100G031058.1/OLAW128G032463.1/OLAW128G018728.1/OLAW128G035912.1/OMAW171G018735.1/OMAW171G036194.1/OMAW171G013999.1/OMAW171G032445.1/OALW18G031308.1/OALW18G014369.1/OALW18G034991.1/OMIW190G036562.1/OMIW190G032840.1/OAUW26G018015.1/OAUW26G08837.1/OOFW323G017886.1/OPUW363G013451.1/OPUW363G035876.1/OPUW363G018567.1/OPUW363G032168.1/OR…	66
GO:0004496	mevalonate kinase activity	27/190905	31/383722	1.50996e-05	5.73723e-05	2.33489e-05	OMEM6G02646.1/OGRW100G071000.1/OGRW100G068712.1/OLAW128G069189.1/OLAW128G069190.1/OLAW128G01893.1/OLAW128G071548.1/OMAW171G072996.1/OMAW171G031757.1/OMAW171G076011.1/OMAW171G076013.1/OALW18G069655.1/OALW18G071905.1/OMIW190G073380.1/OMIW190G032097.1/OMIW190G076463.1/OAUW26G036796.1/OOFW323G039933.1/OPUW363G072879.1/OPUW363G070362.1/ORHW375G017046.1/OBRW59G02199.1/OEIW71G017283.1/OEIW71G037232.1/OE…	27
GO:0030276	clathrin binding	209/190905	342/383722	1.55836e-05	5.90892e-05	2.40476e-05	OMEM6G05499.1/OGRW100G010693.1/OGRW100G04710.1/OLAW128G010649.1/OLAW128G04593.1/OLAW128G04636.1/OMAW171G04900.1/OMAW171G010786.1/OALW18G010910.1/OALW18G04802.1/OMIW190G04899.1/OMIW190G010899.1/OAUW26G05206.1/OAUW26G05247.1/OOFW323G05384.1/OPUW363G010690.1/OPUW363G05012.1/ORHW375G05097.1/OBRW59G04872.1/OEIW71G05336.1/OGLW97G005404.1/OMEM6G03988.1/OGRW100G09172.1/OGRW100G03285.1/OLAW128G09073.1/OLA…	209
GO:0006164	purine nucleotide biosynthetic process	91/190905	134/383722	1.59799e-05	6.04672e-05	2.46085e-05	OMEM6G011644.1/OGRW100G024705.1/OGRW100G028404.1/OLAW128G029444.1/OLAW128G024416.1/OMAW171G029710.1/OMAW171G024652.1/OALW18G025179.1/OALW18G029046.1/OMIW190G024852.1/OMIW190G029894.1/OAUW26G015078.1/OOFW323G015218.1/OPUW363G024489.1/OPUW363G029339.1/ORHW375G014703.1/OBRW59G013310.1/OEIW71G015031.1/OGLW97G0014713.1/OMEM6G012281.1/OGRW100G025391.1/OGRW100G029022.1/OLAW128G030210.1/OLAW128G025042.1/…	91
GO:0005785	signal recognition particle receptor complex	22/190905	24/383722	1.62123e-05	6.12207e-05	2.49151e-05	OMEM6G031596.1/OGRW100G059976.1/OGRW100G062644.1/OLAW128G062783.1/OLAW128G059861.1/OMAW171G063970.1/OMAW171G061003.1/OALW18G060462.1/OALW18G063123.1/OMIW190G061311.1/OMIW190G064315.1/OAUW26G020277.1/OAUW26G032946.1/OAUW26G06944.1/OOFW323G033000.1/OPUW363G063721.1/OPUW363G060784.1/ORHW375G033068.1/OBRW59G010142.1/OBRW59G028289.1/OEIW71G033241.1/OGLW97G0033403.1	22
GO:0003989	acetyl-CoA carboxylase activity	39/190905	49/383722	1.65641e-05	6.24209e-05	2.54035e-05	OMEM6G035584.1/OGRW100G070817.1/OGRW100G068852.1/OLAW128G069337.1/OLAW128G071699.1/OMAW171G073164.1/OMAW171G070683.1/OALW18G069457.1/OALW18G072056.1/OMIW190G073531.1/OMIW190G071047.1/OAUW26G013879.1/OAUW26G036962.1/OOFW323G036923.1/OPUW363G073044.1/OPUW363G070513.1/ORHW375G037234.1/OBRW59G031942.1/OEIW71G037391.1/OGLW97G0037804.1/OMEM6G020491.1/OGRW100G037927.1/OGRW100G041348.1/OLAW128G042601.1/O…	39
GO:0097602	cullin family protein binding	31/190905	37/383722	1.81519e-05	6.82645e-05	2.77817e-05	OMEM6G014585.1/OGRW100G022749.1/OGRW100G07240.1/OGRW100G020988.1/OLAW128G027450.1/OLAW128G053054.1/OLAW128G022605.1/OLAW128G056301.1/OMAW171G056816.1/OMAW171G022716.1/OMAW171G053388.1/OALW18G023122.1/OALW18G052750.1/OALW18G07427.1/OALW18G016633.1/OMIW190G022912.1/OMIW190G021134.1/OMIW190G057066.1/OAUW26G012927.1/OOFW323G013373.1/OOFW323G028584.1/OPUW363G022606.1/OPUW363G027492.1/OPUW363G053253.1/…	31
GO:0003871	5-methyltetrahydropteroyltriglutamate-homocysteine S-methyltransFtrase activity	35/190905	43/383722	1.82536e-05	6.84981e-05	2.78768e-05	OMEM6G041838.1/OGRW100G024401.1/OGRW100G079725.1/OGRW100G028123.1/OGRW100G081850.1/OLAW128G029144.1/OLAW128G083004.1/OLAW128G024118.1/OLAW128G080485.1/OMAW171G029403.1/OMAW171G082675.1/OMAW171G024344.1/OMAW171G085120.1/OALW18G024858.1/OALW18G081071.1/OALW18G028734.1/OALW18G083322.1/OMIW190G085707.1/OMIW190G029582.1/OMIW190G083221.1/OAUW26G014775.1/OAUW26G043312.1/OOFW323G014912.1/OOFW323G044032.1…	35
GO:0043162	ubiquitin-dependent protein catabolic process via the multivesicular body sorting pathway	19/190905	20/383722	1.82885e-05	6.84981e-05	2.78768e-05	OMEM6G023216.1/OGRW100G043877.1/OGRW100G048240.1/OLAW128G045420.1/OLAW128G048904.1/OMAW171G045670.1/OMAW171G049149.1/OALW18G047374.1/OALW18G044164.1/OMIW190G045998.1/OMIW190G049505.1/OAUW26G024287.1/OOFW323G024147.1/OPUW363G048839.1/OPUW363G045429.1/ORHW375G024195.1/OBRW59G021156.1/OEIW71G024270.1/OGLW97G0024071.1	19
GO:0003852	2-isopropylmalate synthase activity	33/190905	40/383722	1.85012e-05	6.88741e-05	2.80298e-05	OMEM6G037426.1/OMEM6G039992.1/OGRW100G077852.1/OGRW100G075488.1/OGRW100G080181.1/OLAW128G075821.1/OLAW128G080962.1/OLAW128G073433.1/OLAW128G078712.1/OMAW171G077893.1/OMAW171G075046.1/OMAW171G083189.1/OALW18G073897.1/OALW18G079101.1/OALW18G076577.1/OALW18G081525.1/OMIW190G083700.1/OMIW190G075418.1/OMIW190G081051.1/OAUW26G038894.1/OAUW26G041241.1/OOFW323G042018.1/OPUW363G074876.1/OPUW363G080543.1/O…	33
GO:0006725	cellular aromatic compound metabolic process	33/190905	40/383722	1.85012e-05	6.88741e-05	2.80298e-05	OMEM6G05470.1/OGRW100G010677.1/OGRW100G010678.1/OGRW100G04694.1/OGRW100G04695.1/OLAW128G010632.1/OLAW128G010633.1/OLAW128G04616.1/OLAW128G04617.1/OMAW171G04881.1/OMAW171G04882.1/OMAW171G010770.1/OMAW171G010771.1/OALW18G010894.1/OALW18G010895.1/OALW18G04786.1/OMIW190G04877.1/OMIW190G04878.1/OMIW190G010881.1/OMIW190G010882.1/OAUW26G05232.1/OAUW26G05233.1/OOFW323G05366.1/OPUW363G010670.1/OPUW363G010…	33
GO:0008198	Ftrrous iron binding	33/190905	40/383722	1.85012e-05	6.88741e-05	2.80298e-05	OMEM6G05470.1/OGRW100G010677.1/OGRW100G010678.1/OGRW100G04694.1/OGRW100G04695.1/OLAW128G010632.1/OLAW128G010633.1/OLAW128G04616.1/OLAW128G04617.1/OMAW171G04881.1/OMAW171G04882.1/OMAW171G010770.1/OMAW171G010771.1/OALW18G010894.1/OALW18G010895.1/OALW18G04786.1/OMIW190G04877.1/OMIW190G04878.1/OMIW190G010881.1/OMIW190G010882.1/OAUW26G05232.1/OAUW26G05233.1/OOFW323G05366.1/OPUW363G010670.1/OPUW363G010…	33
GO:0042147	retrograde transport, endosome to Golgi	76/190905	109/383722	1.85908e-05	6.90675e-05	2.81085e-05	OMEM6G05694.1/OGRW100G010897.1/OGRW100G04903.1/OLAW128G010862.1/OLAW128G04829.1/OMAW171G05112.1/OMAW171G010987.1/OALW18G011108.1/OALW18G04996.1/OMIW190G05107.1/OMIW190G011101.1/OAUW26G05450.1/OOFW323G05590.1/OPUW363G010905.1/OPUW363G05224.1/ORHW375G05308.1/OBRW59G05046.1/OEIW71G05533.1/OGLW97G005606.1/OMEM6G07622.1/OGRW100G012926.1/OGRW100G017368.1/OLAW128G013019.1/OLAW128G017649.1/OMAW171G017593…	76
GO:0003747	translation release factor activity	142/190905	223/383722	1.92353e-05	7.13178e-05	2.90243e-05	OMEM6G011689.1/OMEM6G039716.1/OGRW100G011207.1/OGRW100G024748.1/OGRW100G053533.1/OGRW100G028447.1/OGRW100G057018.1/OLAW128G011169.1/OLAW128G029502.1/OLAW128G054268.1/OLAW128G024459.1/OLAW128G057276.1/OMAW171G029746.1/OMAW171G05410.1/OMAW171G058009.1/OMAW171G011266.1/OMAW171G024700.1/OMAW171G054527.1/OALW18G011420.1/OALW18G025227.1/OALW18G053875.1/OALW18G029103.1/OALW18G057398.1/OMIW190G024888.1/O…	142
GO:0005680	anaphase-promoting complex	152/190905	241/383722	2.12722e-05	7.87114e-05	3.20333e-05	OMEM6G09424.1/OGRW100G014711.1/OGRW100G036831.1/OGRW100G019499.1/OGRW100G040457.1/OLAW128G014905.1/OLAW128G041665.1/OLAW128G019470.1/OLAW128G038304.1/OMAW171G019494.1/OMAW171G014758.1/OMAW171G038729.1/OALW18G019939.1/OALW18G037010.1/OALW18G015125.1/OMIW190G014891.1/OMIW190G019697.1/OMIW190G039064.1/OAUW26G020538.1/OAUW26G09643.1/OOFW323G010173.1/OOFW323G020445.1/OPUW363G014722.1/OPUW363G019338.1/…	152
GO:0008970	phosphatidylcholine 1-acylhydrolase activity	115/190905	176/383722	2.14837e-05	7.93342e-05	3.22868e-05	OMEM6G022547.1/OGRW100G039957.1/OGRW100G043223.1/OLAW128G044711.1/OLAW128G041021.1/OMAW171G045006.1/OMAW171G041639.1/OALW18G040090.1/OALW18G043488.1/OMIW190G045359.1/OMIW190G041941.1/OAUW26G023637.1/OOFW323G023380.1/OPUW363G041235.1/OPUW363G044721.1/ORHW375G023450.1/OBRW59G020535.1/OEIW71G023565.1/OGLW97G0023367.1/OMEM6G022549.1/OGRW100G039959.1/OGRW100G043224.1/OLAW128G044713.1/OLAW128G041023.1/…	115
GO:0071569	protein ufmylation	55/190905	75/383722	2.70725e-05	9.97721e-05	4.06044e-05	OMEM6G035203.1/OGRW100G070470.1/OGRW100G080749.1/OLAW128G068697.1/OLAW128G020437.1/OLAW128G079288.1/OMAW171G04685.1/OMAW171G072896.1/OMAW171G070419.1/OALW18G069073.1/OALW18G071708.1/OALW18G082140.1/OMIW190G073261.1/OMIW190G070801.1/OAUW26G036582.1/OOFW323G036650.1/OPUW363G072758.1/OPUW363G04805.1/OPUW363G070251.1/ORHW375G036651.1/ORHW375G036988.1/OBRW59G031698.1/OBRW59G033630.1/OBRW59G035975.1/OE…	55
GO:0005085	guanyl-nucleotide exchange factor activity	267/190905	450/383722	2.77731e-05	0.00010215	4.1572e-05	OMEM6G010626.1/OGRW100G015912.1/OGRW100G020828.1/OLAW128G016224.1/OLAW128G020695.1/OMAW171G020779.1/OMAW171G016065.1/OALW18G021152.1/OALW18G016464.1/OMIW190G016151.1/OMIW190G020984.1/OAUW26G010977.1/OOFW323G011421.1/OPUW363G015977.1/OPUW363G020659.1/ORHW375G010509.1/OBRW59G09755.1/OEIW71G010646.1/OGLW97G0010507.1/OMEM6G03858.1/OGRW100G09021.1/OGRW100G03145.1/OLAW128G08911.1/OLAW128G03039.1/OMAW17…	267
GO:0000049	tRNA binding	190/190905	310/383722	2.86823e-05	0.000105283	4.28472e-05	OGRW100G079589.1/OMEM6G040248.1/OMEM6G041729.1/OGRW100G078538.1/OGRW100G080390.1/OLAW128G081231.1/OLAW128G082866.1/OLAW128G078928.1/OMAW171G080957.1/OMAW171G082548.1/OMAW171G083460.1/OMAW171G084971.1/OALW18G079844.1/OALW18G080932.1/OALW18G081764.1/OMIW190G083961.1/OMIW190G085583.1/OMIW190G081323.1/OMIW190G083091.1/OAUW26G041516.1/OAUW26G043190.1/OAUW26G043197.1/OOFW323G042314.1/OOFW323G043895.1/O…	190
GO:0005381	iron ion transmembrane transporter activity	58/190905	80/383722	2.9062e-05	0.000106252	4.32417e-05	OMEM6G019415.1/OGRW100G036783.1/OGRW100G040400.1/OLAW128G041608.1/OLAW128G038245.1/OMAW171G042116.1/OMAW171G038667.1/OALW18G036955.1/OALW18G040538.1/OMIW190G042403.1/OMIW190G039007.1/OOFW323G020388.1/OPUW363G038282.1/OPUW363G041722.1/ORHW375G020384.1/OBRW59G017988.1/OEIW71G020549.1/OGLW97G0019992.1/OAUW26G020480.1/OMEM6G025082.1/OMEM6G025114.1/OGRW100G045624.1/OGRW100G049823.1/OLAW128G047212.1/OL…	58
GO:0034755	iron ion transmembrane transport	58/190905	80/383722	2.9062e-05	0.000106252	4.32417e-05	OMEM6G019415.1/OGRW100G036783.1/OGRW100G040400.1/OLAW128G041608.1/OLAW128G038245.1/OMAW171G042116.1/OMAW171G038667.1/OALW18G036955.1/OALW18G040538.1/OMIW190G042403.1/OMIW190G039007.1/OOFW323G020388.1/OPUW363G038282.1/OPUW363G041722.1/ORHW375G020384.1/OBRW59G017988.1/OEIW71G020549.1/OGLW97G0019992.1/OAUW26G020480.1/OMEM6G025082.1/OMEM6G025114.1/OGRW100G045624.1/OGRW100G049823.1/OLAW128G047212.1/OL…	58
GO:0006348	chromatin silencing at telomere	21/190905	23/383722	2.99891e-05	0.000108137	4.40088e-05	OMEM6G033176.1/OGRW100G064151.1/OGRW100G066563.1/OLAW128G066675.1/OLAW128G064196.1/OMAW171G065606.1/OMAW171G068058.1/OALW18G067132.1/OALW18G064576.1/OMIW190G068484.1/OMIW190G065831.1/OAUW26G034445.1/OOFW323G034231.1/OPUW363G067911.1/OPUW363G065232.1/ORHW375G034570.1/OBRW59G029685.1/OBRW59G029693.1/OEIW71G034851.1/OGLW97G0035049.1/OGLW97G0035060.1	21
GO:0008703	5-amino-6-(5-phosphoribosylamino)uracil reductase activity	21/190905	23/383722	2.99891e-05	0.000108137	4.40088e-05	OMAW171G034949.1/OMEM6G041247.1/OMEM6G08507.1/OGRW100G013542.1/OGRW100G018118.1/OLAW128G013634.1/OLAW128G018225.1/OMAW171G018231.1/OMAW171G013542.1/OALW18G018747.1/OALW18G013734.1/OMIW190G013647.1/OMIW190G018412.1/OAUW26G08324.1/OOFW323G08946.1/OPUW363G013915.1/OPUW363G018086.1/ORHW375G07888.1/OBRW59G07570.1/OEIW71G08158.1/OGLW97G008220.1	21
GO:0019632	shikimate metabolic process	21/190905	23/383722	2.99891e-05	0.000108137	4.40088e-05	OBRW59G02325.1/OMEM6G041340.1/OGRW100G079194.1/OGRW100G081359.1/OLAW128G082412.1/OLAW128G079984.1/OMAW171G082083.1/OMAW171G084540.1/OALW18G080536.1/OALW18G082806.1/OMIW190G085130.1/OMIW190G082638.1/OAUW26G042766.1/OOFW323G043454.1/OPUW363G082032.1/OPUW363G084531.1/ORHW375G043848.1/OBRW59G037137.1/OBRW59G037138.1/OEIW71G043950.1/OGLW97G0044568.1	21
GO:0031167	rRNA methylation	21/190905	23/383722	2.99891e-05	0.000108137	4.40088e-05	OMEM6G022478.1/OGRW100G039881.1/OGRW100G043159.1/OLAW128G044632.1/OLAW128G040955.1/OMAW171G044944.1/OMAW171G041558.1/OALW18G040016.1/OALW18G043422.1/OMIW190G045290.1/OMIW190G041858.1/OAUW26G023565.1/OOFW323G023299.1/OPUW363G041167.1/OPUW363G044645.1/ORHW375G023377.1/OBRW59G020474.1/OEIW71G023483.1/OGLW97G0023266.1/OMAW171G025005.1/OMIW190G030257.1	21
GO:0035196	production of miRNAs involved in gene silencing by miRNA	21/190905	23/383722	2.99891e-05	0.000108137	4.40088e-05	OMEM6G08686.1/OGRW100G013693.1/OGRW100G018454.1/OLAW128G013822.1/OLAW128G018421.1/OMAW171G018406.1/OMAW171G013726.1/OMAW171G013728.1/OALW18G018893.1/OALW18G014079.1/OMIW190G013817.1/OMIW190G018585.1/OMIW190G018586.1/OAUW26G08517.1/OOFW323G09119.1/OPUW363G013747.1/OPUW363G018255.1/ORHW375G08062.1/OBRW59G07724.1/OEIW71G08330.1/OGLW97G008369.1	21
GO:0106035	protein maturation by [4Ft-4S] cluster transFtr	21/190905	23/383722	2.99891e-05	0.000108137	4.40088e-05	OMEM6G012247.1/OGRW100G025355.1/OGRW100G028995.1/OLAW128G030170.1/OLAW128G025007.1/OMAW171G030332.1/OMAW171G025322.1/OALW18G025853.1/OALW18G029652.1/OMIW190G025441.1/OMIW190G037864.1/OMIW190G030577.1/OAUW26G015724.1/OOFW323G015894.1/OPUW363G025092.1/OPUW363G029997.1/ORHW375G015383.1/OBRW59G013875.1/OBRW59G016960.1/OEIW71G015710.1/OGLW97G0015376.1	21
GO:1903730	regulation of phosphatidate phosphatase activity	21/190905	23/383722	2.99891e-05	0.000108137	4.40088e-05	OMEM6G08686.1/OGRW100G013693.1/OGRW100G018454.1/OLAW128G013822.1/OLAW128G018421.1/OMAW171G018406.1/OMAW171G013726.1/OMAW171G013728.1/OALW18G018893.1/OALW18G014079.1/OMIW190G013817.1/OMIW190G018585.1/OMIW190G018586.1/OAUW26G08517.1/OOFW323G09119.1/OPUW363G013747.1/OPUW363G018255.1/ORHW375G08062.1/OBRW59G07724.1/OEIW71G08330.1/OGLW97G008369.1	21
GO:0005484	SNAP receptor activity	234/190905	390/383722	3.02019e-05	0.000108691	4.42344e-05	OALW18G047453.1/OMIW190G046066.1/OAUW26G024354.1/OOFW323G024217.1/OPUW363G048907.1/OPUW363G045509.1/ORHW375G024272.1/OMEM6G011944.1/OGRW100G025039.1/OGRW100G028707.1/OLAW128G029830.1/OLAW128G024727.1/OMAW171G030041.1/OMAW171G025006.1/OALW18G025534.1/OALW18G029356.1/OMIW190G025158.1/OMIW190G0286.1/OMIW190G062031.1/OMIW190G030258.1/OAUW26G015438.1/OOFW323G015589.1/OPUW363G024805.1/OPUW363G029680.1/…	234
GO:0003864	3-methyl-2-oxobutanoate hydroxymethyltransFtrase activity	32/190905	39/383722	3.08984e-05	0.000110764	4.5078e-05	OMEM6G01787.1/OMEM6G01788.1/OGRW100G046736.1/OGRW100G01087.1/OLAW128G06579.1/OLAW128G06580.1/OLAW128G0964.1/OMAW171G01000.1/OMAW171G0999.1/OMAW171G06918.1/OMAW171G06919.1/OALW18G050256.1/OALW18G01070.1/OMIW190G0976.1/OMIW190G0977.1/OMIW190G06883.1/OMIW190G06884.1/OAUW26G01066.1/OAUW26G01067.1/OOFW323G01519.1/OOFW323G01520.1/OPUW363G06841.1/OPUW363G06842.1/OPUW363G01052.1/OPUW363G01053.1/ORHW375G0…	32
GO:0019135	deoxyhypusine monooxygenase activity	32/190905	39/383722	3.08984e-05	0.000110764	4.5078e-05	OMEM6G041866.1/OGRW100G078023.1/OGRW100G079743.1/OGRW100G080321.1/OGRW100G081864.1/OLAW128G081137.1/OLAW128G083025.1/OLAW128G078849.1/OLAW128G080471.1/OMAW171G080871.1/OMAW171G083359.1/OMAW171G085137.1/OALW18G079297.1/OALW18G079878.1/OALW18G081089.1/OALW18G081691.1/OALW18G083337.1/OMIW190G083869.1/OMIW190G083240.1/OAUW26G041422.1/OAUW26G043329.1/OOFW323G042211.1/OOFW323G044046.1/OPUW363G080702.1/…	32
GO:0004830	tryptophan-tRNA ligase activity	43/190905	56/383722	3.13976e-05	0.000112117	4.56285e-05	OMEM6G041364.1/OGRW100G079219.1/OGRW100G081382.1/OLAW128G082435.1/OLAW128G080003.1/OMAW171G082113.1/OMAW171G084569.1/OALW18G080561.1/OALW18G082827.1/OMIW190G085164.1/OMIW190G082672.1/OAUW26G042790.1/OOFW323G014750.1/OOFW323G043425.1/OPUW363G082057.1/OPUW363G028861.1/OPUW363G053492.1/OPUW363G084551.1/ORHW375G028970.1/ORHW375G043878.1/OBRW59G037158.1/OEIW71G029121.1/OEIW71G043974.1/OGLW97G0044612.1…	43
GO:0006436	tryptophanyl-tRNA aminoacylation	43/190905	56/383722	3.13976e-05	0.000112117	4.56285e-05	OMEM6G041364.1/OGRW100G079219.1/OGRW100G081382.1/OLAW128G082435.1/OLAW128G080003.1/OMAW171G082113.1/OMAW171G084569.1/OALW18G080561.1/OALW18G082827.1/OMIW190G085164.1/OMIW190G082672.1/OAUW26G042790.1/OOFW323G014750.1/OOFW323G043425.1/OPUW363G082057.1/OPUW363G028861.1/OPUW363G053492.1/OPUW363G084551.1/ORHW375G028970.1/ORHW375G043878.1/OBRW59G037158.1/OEIW71G029121.1/OEIW71G043974.1/OGLW97G0044612.1…	43
GO:0042393	histone binding	158/190905	253/383722	3.21045e-05	0.000114419	4.65653e-05	OMEM6G026980.1/OGRW100G051923.1/OGRW100G055617.1/OLAW128G052653.1/OLAW128G055948.1/OMAW171G056519.1/OMAW171G053024.1/OALW18G052327.1/OALW18G055972.1/OMIW190G053406.1/OMIW190G056698.1/OAUW26G028345.1/OOFW323G028212.1/OPUW363G056181.1/OPUW363G052872.1/ORHW375G028287.1/OBRW59G024428.1/OEIW71G028455.1/OGLW97G0028468.1/OMEM6G05550.1/OGRW100G010747.1/OGRW100G04762.1/OLAW128G010701.1/OLAW128G04687.1/OMA…	158
GO:0000070	mitotic sister chromatid segregation	18/190905	19/383722	3.50104e-05	0.000124054	5.04866e-05	OMEM6G017574.1/OGRW100G034845.1/OGRW100G031566.1/OLAW128G032995.1/OLAW128G036443.1/OMAW171G036724.1/OMAW171G032982.1/OALW18G031841.1/OALW18G035520.1/OMIW190G034580.1/OAUW26G018557.1/OOFW323G018392.1/OPUW363G032657.1/ORHW375G018352.1/OBRW59G016295.1/OEIW71G018609.1/OGLW97G0018251.1/OGLW97G0021622.1	18
GO:0004399	histidinol dehydrogenase activity	18/190905	19/383722	3.50104e-05	0.000124054	5.04866e-05	OMEM6G01840.1/OGRW100G046668.1/OGRW100G01142.1/OLAW128G06642.1/OLAW128G01019.1/OMAW171G01054.1/OMAW171G06979.1/OALW18G050193.1/OALW18G01132.1/OMIW190G01031.1/OAUW26G01137.1/OOFW323G01576.1/OPUW363G06898.1/OPUW363G01115.1/ORHW375G01203.1/OBRW59G01502.1/OEIW71G01431.1/OGLW97G001309.1	18
GO:0016407	acetyltransFtrase activity	18/190905	19/383722	3.50104e-05	0.000124054	5.04866e-05	OMEM6G017574.1/OGRW100G034845.1/OGRW100G031566.1/OLAW128G032995.1/OLAW128G036443.1/OMAW171G036724.1/OMAW171G032982.1/OALW18G031841.1/OALW18G035520.1/OMIW190G034580.1/OAUW26G018557.1/OOFW323G018392.1/OPUW363G032657.1/ORHW375G018352.1/OBRW59G016295.1/OEIW71G018609.1/OGLW97G0018251.1/OGLW97G0021622.1	18
GO:0016628	oxidoreductase activity, acting on the CH-CH group of donors, NAD or NADP as acceptor	71/190905	102/383722	3.77427e-05	0.000133479	5.4322e-05	OMEM6G034665.1/OMEM6G06621.1/OGRW100G071179.1/OGRW100G068021.1/OGRW100G068966.1/OLAW128G068297.1/OLAW128G069513.1/OLAW128G071810.1/OMAW171G01834.1/OMAW171G067238.1/OMAW171G069664.1/OMAW171G070849.1/OALW18G068744.1/OALW18G069835.1/OALW18G066101.1/OALW18G072181.1/OMIW190G01843.1/OMIW190G070078.1/OMIW190G067402.1/OMIW190G071236.1/OAUW26G035956.1/OAUW26G037106.1/OOFW323G035882.1/OOFW323G037083.1/OPUW…	71
GO:0045292	mRNA cis splicing, via spliceosome	68/190905	97/383722	3.8083e-05	0.000134423	5.47066e-05	OMAW171G029797.1/OMAW171G024769.1/OMIW190G024934.1/OAUW26G015191.1/OOFW323G015340.1/OPUW363G024567.1/OPUW363G029438.1/ORHW375G014815.1/OBRW59G013395.1/OGLW97G0014809.1/OMEM6G02924.1/OGRW100G08095.1/OGRW100G02278.1/OLAW128G07971.1/OLAW128G02142.1/OMAW171G02311.1/OMAW171G08165.1/OALW18G08314.1/OALW18G02273.1/OMIW190G02291.1/OMIW190G08154.1/OAUW26G02560.1/OAUW26G02566.1/OOFW323G02784.1/OPUW363G08148…	68
GO:0015250	water channel activity	23/190905	26/383722	3.97321e-05	0.000139976	5.69661e-05	OMEM6G01532.1/OGRW100G023426.1/OGRW100G047074.1/OGRW100G0740.1/OLAW128G028200.1/OLAW128G06233.1/OLAW128G0636.1/OMAW171G0678.1/OMAW171G06589.1/OALW18G023853.1/OALW18G050605.1/OALW18G040376.1/OALW18G0699.1/OMIW190G0671.1/OMIW190G06542.1/OAUW26G0710.1/OOFW323G01173.1/OOFW323G014080.1/OPUW363G06523.1/OPUW363G0726.1/ORHW375G0830.1/OBRW59G01135.1/OEIW71G01059.1	23
GO:0005777	peroxisome	182/190905	297/383722	4.21617e-05	0.000148251	6.03341e-05	OMEM6G09458.1/OGRW100G014744.1/OGRW100G019529.1/OLAW128G014936.1/OLAW128G019498.1/OMAW171G019527.1/OMAW171G014789.1/OALW18G019974.1/OALW18G015152.1/OMIW190G014919.1/OMIW190G019735.1/OAUW26G09681.1/OOFW323G010206.1/OPUW363G014758.1/OPUW363G019368.1/ORHW375G09229.1/OBRW59G08655.1/OEIW71G09407.1/OGLW97G009174.1/OMEM6G015094.1/OMEM6G015095.1/OGRW100G023219.1/OGRW100G023220.1/OGRW100G027116.1/OLAW128G…	182
GO:0005832	chaperonin-containing T-complex	37/190905	47/383722	4.28426e-05	0.000150358	6.11914e-05	OMEM6G019806.1/OMEM6G022367.1/OGRW100G024175.1/OGRW100G039771.1/OGRW100G027900.1/OGRW100G043060.1/OLAW128G028877.1/OLAW128G044529.1/OLAW128G023920.1/OLAW128G040856.1/OMAW171G029181.1/OMAW171G024075.1/OMAW171G041461.1/OALW18G024611.1/OALW18G039898.1/OALW18G028508.1/OALW18G043324.1/OMIW190G024275.1/OMIW190G045194.1/OMIW190G029294.1/OMIW190G041751.1/OAUW26G014495.1/OAUW26G023471.1/OOFW323G014671.1/O…	37
GO:0009765	photosynthesis, light harvesting	190/190905	312/383722	4.88475e-05	0.000171106	6.96352e-05	OMEM6G033171.1/OMEM6G03332.1/OMEM6G04172.1/OGRW100G064144.1/OGRW100G08470.1/OGRW100G09367.1/OGRW100G02645.1/OGRW100G03464.1/OGRW100G066556.1/OLAW128G066665.1/OLAW128G08359.1/OLAW128G09282.1/OLAW128G02539.1/OLAW128G03365.1/OLAW128G064190.1/OMAW171G02683.1/OMAW171G03556.1/OMAW171G065593.1/OMAW171G068047.1/OMAW171G08559.1/OMAW171G09443.1/OALW18G067115.1/OALW18G08695.1/OALW18G09551.1/OALW18G02654.1/O…	190
GO:0005986	sucrose biosynthetic process	116/190905	180/383722	4.94861e-05	0.000173013	7.04114e-05	OMEM6G025579.1/OMEM6G07080.1/OGRW100G012299.1/OGRW100G046073.1/OGRW100G016802.1/OGRW100G050298.1/OLAW128G012436.1/OLAW128G047701.1/OLAW128G017106.1/OLAW128G050912.1/OMAW171G016982.1/OMAW171G047920.1/OMAW171G012372.1/OMAW171G051340.1/OALW18G017349.1/OALW18G049589.1/OALW18G012736.1/OALW18G046186.1/OMIW190G012398.1/OMIW190G048277.1/OMIW190G017248.1/OMIW190G051726.1/OAUW26G026709.1/OAUW26G06931.1/OOF…	116
GO:0008408	3'-5' exonuclease activity	265/190905	449/383722	4.96153e-05	0.000173136	7.04614e-05	OGRW100G054861.1/OLAW128G051704.1/OLAW128G055202.1/OLAW128G055207.1/OMAW171G055553.1/OMAW171G055554.1/OMAW171G055556.1/OMAW171G052186.1/OMAW171G052192.1/OALW18G051487.1/OALW18G051493.1/OALW18G055216.1/OALW18G055221.1/OMIW190G052545.1/OMIW190G052546.1/OMIW190G055855.1/OMIW190G055856.1/OMIW190G055861.1/OAUW26G027537.1/OOFW323G027302.1/OOFW323G027308.1/OOFW323G027309.1/OOFW323G027314.1/OPUW363G05532…	265
GO:0004168	dolichol kinase activity	27/190905	32/383722	5.05174e-05	0.000175617	7.14712e-05	OMEM6G06759.1/OGRW100G016506.1/OLAW128G016812.1/OMAW171G016658.1/OMAW171G012010.1/OMAW171G012017.1/OMAW171G012026.1/OMAW171G012033.1/OALW18G017171.1/OALW18G012404.1/OMIW190G012045.1/OMIW190G016866.1/OMIW190G016893.1/OMIW190G081786.1/OMIW190G082898.1/OAUW26G06600.1/OOFW323G042816.1/OOFW323G042817.1/OOFW323G042825.1/OOFW323G07385.1/OPUW363G011909.1/OPUW363G016595.1/ORHW375G043178.1/ORHW375G043183.1…	27
GO:0043048	dolichyl monophosphate biosynthetic process	27/190905	32/383722	5.05174e-05	0.000175617	7.14712e-05	OMEM6G06759.1/OGRW100G016506.1/OLAW128G016812.1/OMAW171G016658.1/OMAW171G012010.1/OMAW171G012017.1/OMAW171G012026.1/OMAW171G012033.1/OALW18G017171.1/OALW18G012404.1/OMIW190G012045.1/OMIW190G016866.1/OMIW190G016893.1/OMIW190G081786.1/OMIW190G082898.1/OAUW26G06600.1/OOFW323G042816.1/OOFW323G042817.1/OOFW323G042825.1/OOFW323G07385.1/OPUW363G011909.1/OPUW363G016595.1/ORHW375G043178.1/ORHW375G043183.1…	27
GO:0000221	vacuolar proton-transporting V-type ATPase, V1 domain	20/190905	22/383722	5.52738e-05	0.000180548	7.34779e-05	OMEM6G028290.1/OGRW100G053247.1/OGRW100G056704.1/OLAW128G053965.1/OLAW128G056968.1/OMAW171G057670.1/OMAW171G054239.1/OALW18G053582.1/OALW18G057071.1/OMIW190G054585.1/OMIW190G057876.1/OAUW26G029622.1/OAUW26G06798.1/OOFW323G029397.1/OPUW363G057429.1/OPUW363G054057.1/ORHW375G029534.1/OBRW59G025502.1/OEIW71G029720.1/OGLW97G0029873.1	20
GO:0001164	RNA polymerase I CORE element sequence-specific DNA binding	20/190905	22/383722	5.52738e-05	0.000180548	7.34779e-05	OMEM6G020814.1/OGRW100G038221.1/OGRW100G041617.1/OLAW128G042930.1/OLAW128G039441.1/OMAW171G043331.1/OMAW171G039944.1/OALW18G038296.1/OALW18G041800.1/OMIW190G043644.1/OMIW190G040230.1/OMIW190G040231.1/OAUW26G021779.1/OOFW323G021648.1/OPUW363G039496.1/OPUW363G043008.1/ORHW375G021677.1/OBRW59G019069.1/OEIW71G021792.1/OGLW97G0021430.1	20
GO:0001188	RNA polymerase I transcriptional preinitiation complex assembly	20/190905	22/383722	5.52738e-05	0.000180548	7.34779e-05	OMEM6G020814.1/OGRW100G038221.1/OGRW100G041617.1/OLAW128G042930.1/OLAW128G039441.1/OMAW171G043331.1/OMAW171G039944.1/OALW18G038296.1/OALW18G041800.1/OMIW190G043644.1/OMIW190G040230.1/OMIW190G040231.1/OAUW26G021779.1/OOFW323G021648.1/OPUW363G039496.1/OPUW363G043008.1/ORHW375G021677.1/OBRW59G019069.1/OEIW71G021792.1/OGLW97G0021430.1	20
GO:0001664	G-protein coupled receptor binding	20/190905	22/383722	5.52738e-05	0.000180548	7.34779e-05	OMEM6G020765.1/OGRW100G038151.1/OGRW100G041566.1/OLAW128G042841.1/OLAW128G039379.1/OMAW171G043267.1/OMAW171G039758.1/OALW18G038228.1/OALW18G041743.1/OMIW190G043579.1/OMIW190G040180.1/OAUW26G021710.1/OOFW323G021569.1/OPUW363G039048.1/OPUW363G042936.1/ORHW375G021615.1/OBRW59G021881.1/OEIW71G021869.1/OGLW97G0021332.1/OGLW97G0021363.1	20
GO:0003689	DNA clamp loader activity	20/190905	22/383722	5.52738e-05	0.000180548	7.34779e-05	OMEM6G038981.1/OGRW100G074606.1/OGRW100G074613.1/OGRW100G076877.1/OLAW128G077577.1/OLAW128G074879.1/OMAW171G079626.1/OMAW171G076719.1/OALW18G075637.1/OALW18G078115.1/OMIW190G080062.1/OMIW190G077180.1/OAUW26G040354.1/OOFW323G040663.1/OPUW363G076571.1/OPUW363G079371.1/ORHW375G041143.1/OBRW59G035079.1/OEIW71G041162.1/OGLW97G0041704.1	20
GO:0003949	1-(5-phosphoribosyl)-5-[(5-phosphoribosylamino)methylideneamino]imidazole-4-carboxamide isomerase activity	20/190905	22/383722	5.52738e-05	0.000180548	7.34779e-05	OMEM6G021170.1/OGRW100G038590.1/OGRW100G041949.1/OLAW128G043302.1/OLAW128G039729.1/OMAW171G043678.1/OMAW171G040272.1/OALW18G038687.1/OALW18G042128.1/OMIW190G044022.1/OMIW190G044027.1/OMIW190G040545.1/OAUW26G022149.1/OOFW323G022008.1/OPUW363G039883.1/OPUW363G043348.1/ORHW375G022036.1/OBRW59G019377.1/OEIW71G022181.1/OGLW97G0021798.1	20
GO:0004126	cytidine deaminase activity	20/190905	22/383722	5.52738e-05	0.000180548	7.34779e-05	OMEM6G04119.1/OGRW100G09294.1/OGRW100G03411.1/OLAW128G09203.1/OLAW128G03314.1/OMAW171G03492.1/OMAW171G09362.1/OALW18G09478.1/OALW18G03476.1/OMIW190G03497.1/OMIW190G09448.1/OAUW26G03807.1/OOFW323G04005.1/OPUW363G09349.1/OPUW363G03639.1/ORHW375G03695.1/OBRW59G03715.1/OEIW71G03983.1/OGLW97G0026475.1/OGLW97G004053.1	20
GO:0004357	glutamate-cysteine ligase activity	20/190905	22/383722	5.52738e-05	0.000180548	7.34779e-05	OMEM6G019387.1/OGRW100G036758.1/OGRW100G040379.1/OLAW128G041580.1/OLAW128G038226.1/OMAW171G042086.1/OMAW171G038645.1/OALW18G036932.1/OALW18G040518.1/OMIW190G042378.1/OMIW190G038989.1/OAUW26G020463.1/OOFW323G020367.1/OPUW363G038250.1/OPUW363G041706.1/ORHW375G020364.1/OBRW59G017977.1/OEIW71G020528.1/OGLW97G0019965.1/OGLW97G0029271.1	20
GO:0004417	hydroxyethylthiazole kinase activity	20/190905	22/383722	5.52738e-05	0.000180548	7.34779e-05	OMEM6G02489.1/OGRW100G07653.1/OGRW100G01908.1/OLAW128G07514.1/OLAW128G01773.1/OMAW171G01918.1/OMAW171G01919.1/OMAW171G07804.1/OALW18G07848.1/OALW18G01920.1/OMIW190G01919.1/OMIW190G07799.1/OAUW26G02125.1/OOFW323G02421.1/OPUW363G07772.1/OPUW363G02021.1/ORHW375G02102.1/OBRW59G02252.1/OEIW71G02353.1/OGLW97G002244.1	20
GO:0004640	phosphoribosylanthranilate isomerase activity	20/190905	22/383722	5.52738e-05	0.000180548	7.34779e-05	OMEM6G07627.1/OGRW100G012930.1/OGRW100G017373.1/OLAW128G013024.1/OLAW128G017653.1/OMAW171G017598.1/OMAW171G012985.1/OALW18G018094.1/OALW18G013277.1/OMIW190G012984.1/OMIW190G017851.1/OAUW26G07538.1/OOFW323G08380.1/OPUW363G012848.1/OPUW363G017548.1/ORHW375G07314.1/OBRW59G06983.1/OBRW59G07008.1/OEIW71G07534.1/OGLW97G007616.1	20
GO:0004735	pyrroline-5-carboxylate reductase activity	20/190905	22/383722	5.52738e-05	0.000180548	7.34779e-05	OMEM6G06017.1/OGRW100G011242.1/OGRW100G05214.1/OLAW128G011206.1/OLAW128G05144.1/OMAW171G05451.1/OMAW171G011305.1/OALW18G011459.1/OALW18G05337.1/OMIW190G05459.1/OMIW190G011439.1/OAUW26G05819.1/OOFW323G05934.1/OPUW363G011442.1/OPUW363G05556.1/ORHW375G05660.1/OBRW59G022506.1/OBRW59G05398.1/OEIW71G05877.1/OGLW97G005913.1	20
GO:0005663	DNA replication factor C complex	20/190905	22/383722	5.52738e-05	0.000180548	7.34779e-05	OMEM6G038981.1/OGRW100G074606.1/OGRW100G074613.1/OGRW100G076877.1/OLAW128G077577.1/OLAW128G074879.1/OMAW171G079626.1/OMAW171G076719.1/OALW18G075637.1/OALW18G078115.1/OMIW190G080062.1/OMIW190G077180.1/OAUW26G040354.1/OOFW323G040663.1/OPUW363G076571.1/OPUW363G079371.1/ORHW375G041143.1/OBRW59G035079.1/OEIW71G041162.1/OGLW97G0041704.1	20
GO:0005834	heterotrimeric G-protein complex	20/190905	22/383722	5.52738e-05	0.000180548	7.34779e-05	OMEM6G020765.1/OGRW100G038151.1/OGRW100G041566.1/OLAW128G042841.1/OLAW128G039379.1/OMAW171G043267.1/OMAW171G039758.1/OALW18G038228.1/OALW18G041743.1/OMIW190G043579.1/OMIW190G040180.1/OAUW26G021710.1/OOFW323G021569.1/OPUW363G039048.1/OPUW363G042936.1/ORHW375G021615.1/OBRW59G021881.1/OEIW71G021869.1/OGLW97G0021332.1/OGLW97G0021363.1	20
GO:0006544	glycine metabolic process	20/190905	22/383722	5.52738e-05	0.000180548	7.34779e-05	OMEM6G04106.1/OGRW100G09278.1/OGRW100G03403.1/OLAW128G09188.1/OLAW128G03306.1/OMAW171G03485.1/OMAW171G09345.1/OALW18G09462.1/OALW18G03465.1/OMIW190G03491.1/OMIW190G09430.1/OAUW26G03796.1/OOFW323G03985.1/OPUW363G09342.1/OPUW363G03624.1/ORHW375G03677.1/OBRW59G03711.1/OEIW71G03970.1/OGLW97G0026477.1/OGLW97G004037.1	20
GO:0007095	mitotic G2 DNA damage checkpoint	20/190905	22/383722	5.52738e-05	0.000180548	7.34779e-05	OMEM6G036220.1/OGRW100G071830.1/OGRW100G069564.1/OLAW128G070152.1/OLAW128G072383.1/OMAW171G073946.1/OMAW171G071513.1/OALW18G070495.1/OALW18G072782.1/OALW18G072783.1/OMIW190G074293.1/OMIW190G071902.1/OAUW26G037813.1/OOFW323G037722.1/OPUW363G073798.1/OPUW363G071295.1/ORHW375G038084.1/OBRW59G032609.1/OEIW71G038210.1/OGLW97G0038616.1	20
GO:0007188	adenylate cyclase-modulating G-protein coupled receptor signaling pathway	20/190905	22/383722	5.52738e-05	0.000180548	7.34779e-05	OMEM6G020765.1/OGRW100G038151.1/OGRW100G041566.1/OLAW128G042841.1/OLAW128G039379.1/OMAW171G043267.1/OMAW171G039758.1/OALW18G038228.1/OALW18G041743.1/OMIW190G043579.1/OMIW190G040180.1/OAUW26G021710.1/OOFW323G021569.1/OPUW363G039048.1/OPUW363G042936.1/ORHW375G021615.1/OBRW59G021881.1/OEIW71G021869.1/OGLW97G0021332.1/OGLW97G0021363.1	20
GO:0008242	omega peptidase activity	20/190905	22/383722	5.52738e-05	0.000180548	7.34779e-05	OMEM6G022017.1/OGRW100G039447.1/OGRW100G042768.1/OLAW128G044193.1/OLAW128G040544.1/OMAW171G044549.1/OMAW171G041114.1/OALW18G039548.1/OALW18G042989.1/OMIW190G044908.1/OMIW190G041399.1/OAUW26G023156.1/OAUW26G025099.1/OOFW323G022853.1/OPUW363G040755.1/OPUW363G044226.1/ORHW375G022905.1/OBRW59G020133.1/OEIW71G023043.1/OGLW97G0022803.1	20
GO:0008734	L-aspartate oxidase activity	20/190905	22/383722	5.52738e-05	0.000180548	7.34779e-05	OMEM6G06683.1/OGRW100G011890.1/OGRW100G016379.1/OLAW128G011979.1/OLAW128G016690.1/OMAW171G016570.1/OMAW171G011932.1/OALW18G017099.1/OALW18G012297.1/OMIW190G011963.1/OMIW190G016780.1/OAUW26G06523.1/OOFW323G07273.1/OPUW363G011825.1/OPUW363G016505.1/ORHW375G021289.1/OBRW59G06149.1/OEIW71G021422.1/OEIW71G06439.1/OGLW97G006535.1	20
GO:0008824	cyanate hydratase activity	20/190905	22/383722	5.52738e-05	0.000180548	7.34779e-05	OMEM6G036082.1/OGRW100G071660.1/OGRW100G069448.1/OLAW128G070031.1/OLAW128G072272.1/OMAW171G073827.1/OMAW171G071372.1/OALW18G070370.1/OALW18G072656.1/OMIW190G074172.1/OMIW190G071749.1/OAUW26G037679.1/OOFW323G037595.1/OPUW363G073670.1/OPUW363G071150.1/OPUW363G071157.1/ORHW375G037952.1/OBRW59G032500.1/OEIW71G038081.1/OGLW97G0038496.1	20
GO:0009972	cytidine deamination	20/190905	22/383722	5.52738e-05	0.000180548	7.34779e-05	OMEM6G04119.1/OGRW100G09294.1/OGRW100G03411.1/OLAW128G09203.1/OLAW128G03314.1/OMAW171G03492.1/OMAW171G09362.1/OALW18G09478.1/OALW18G03476.1/OMIW190G03497.1/OMIW190G09448.1/OAUW26G03807.1/OOFW323G04005.1/OPUW363G09349.1/OPUW363G03639.1/ORHW375G03695.1/OBRW59G03715.1/OEIW71G03983.1/OGLW97G0026475.1/OGLW97G004053.1	20
GO:0010091	trichome branching	20/190905	22/383722	5.52738e-05	0.000180548	7.34779e-05	OMEM6G036794.1/OGRW100G072436.1/OGRW100G070114.1/OLAW128G070345.1/OLAW128G072925.1/OMAW171G074529.1/OMAW171G072140.1/OALW18G071124.1/OALW18G073356.1/OMIW190G074884.1/OMIW190G072505.1/OAUW26G01979.1/OAUW26G038441.1/OOFW323G038334.1/OPUW363G074391.1/OPUW363G071912.1/ORHW375G038703.1/OBRW59G033159.1/OEIW71G038851.1/OGLW97G0039137.1	20
GO:0016830	carbon-carbon lyase activity	20/190905	22/383722	5.52738e-05	0.000180548	7.34779e-05	OMEM6G011508.1/OGRW100G024557.1/OGRW100G028275.1/OLAW128G029302.1/OLAW128G024276.1/OMAW171G029554.1/OMAW171G024513.1/OALW18G025021.1/OALW18G028883.1/OMIW190G024696.1/OMIW190G029760.1/OAUW26G014931.1/OOFW323G015067.1/OPUW363G022963.1/OPUW363G024344.1/OPUW363G029189.1/ORHW375G014540.1/OBRW59G013183.1/OEIW71G014876.1/OGLW97G0014560.1	20
GO:0016888	endodeoxyribonuclease activity, producing 5'-phosphomonoesters	20/190905	22/383722	5.52738e-05	0.000180548	7.34779e-05	OMEM6G026459.1/OMEM6G040001.1/OGRW100G051427.1/OGRW100G055128.1/OLAW128G052081.1/OLAW128G055486.1/OMAW171G055904.1/OMAW171G052534.1/OALW18G051835.1/OALW18G055480.1/OMIW190G052887.1/OMIW190G056192.1/OAUW26G027803.1/OOFW323G027701.1/OPUW363G055657.1/OPUW363G052356.1/ORHW375G027757.1/OBRW59G024042.1/OEIW71G027863.1/OGLW97G0027880.1	20
GO:0019310	inositol catabolic process	20/190905	22/383722	5.52738e-05	0.000180548	7.34779e-05	OMEM6G025077.1/OMEM6G025119.1/OGRW100G045632.1/OGRW100G049833.1/OLAW128G047222.1/OLAW128G050499.1/OMAW171G047448.1/OMAW171G050824.1/OALW18G049125.1/OALW18G045744.1/OMIW190G047799.1/OMIW190G051239.1/OAUW26G026214.1/OOFW323G025915.1/OPUW363G050662.1/OPUW363G047125.1/ORHW375G025982.1/OBRW59G022657.1/OEIW71G026098.1/OGLW97G0026161.1	20
GO:0030366	molybdopterin synthase activity	20/190905	22/383722	5.52738e-05	0.000180548	7.34779e-05	OMEM6G06738.1/OGRW100G011942.1/OGRW100G016475.1/OLAW128G011789.1/OLAW128G012032.1/OLAW128G047704.1/OLAW128G016785.1/OMAW171G016638.1/OMAW171G011988.1/OALW18G017148.1/OALW18G012384.1/OMIW190G012019.1/OMIW190G016835.1/OAUW26G06572.1/OOFW323G07339.1/OPUW363G011882.1/OPUW363G016561.1/ORHW375G06335.1/OBRW59G06195.1/OGLW97G006591.1	20
GO:0030677	ribonuclease P complex	20/190905	22/383722	5.52738e-05	0.000180548	7.34779e-05	OMEM6G021644.1/OMEM6G036887.1/OGRW100G039096.1/OGRW100G042432.1/OLAW128G043830.1/OLAW128G040208.1/OMAW171G044169.1/OALW18G039191.1/OALW18G042626.1/OMIW190G044522.1/OMIW190G041045.1/OAUW26G011182.1/OAUW26G022774.1/OOFW323G022511.1/OPUW363G040394.1/OPUW363G043843.1/ORHW375G022523.1/OBRW59G019805.1/OEIW71G022680.1/OGLW97G0022335.1	20
GO:0042398	cellular modified amino acid biosynthetic process	20/190905	22/383722	5.52738e-05	0.000180548	7.34779e-05	OMEM6G019387.1/OGRW100G036758.1/OGRW100G040379.1/OLAW128G041580.1/OLAW128G038226.1/OMAW171G042086.1/OMAW171G038645.1/OALW18G036932.1/OALW18G040518.1/OMIW190G042378.1/OMIW190G038989.1/OAUW26G020463.1/OOFW323G020367.1/OPUW363G038250.1/OPUW363G041706.1/ORHW375G020364.1/OBRW59G017977.1/OEIW71G020528.1/OGLW97G0019965.1/OGLW97G0029271.1	20
GO:0045900	negative regulation of translational elongation	20/190905	22/383722	5.52738e-05	0.000180548	7.34779e-05	OMEM6G023950.1/OGRW100G044543.1/OGRW100G048899.1/OLAW128G046158.1/OLAW128G049549.1/OMAW171G046362.1/OALW18G048094.1/OALW18G044827.1/OMIW190G046687.1/OMIW190G050195.1/OAUW26G025011.1/OAUW26G042532.1/OOFW323G016196.1/OOFW323G024867.1/OPUW363G049522.1/OPUW363G046090.1/ORHW375G024918.1/OBRW59G021762.1/OEIW71G024967.1/OGLW97G0024887.1	20
GO:0046406	magnesium protoporphyrin IX methyltransFtrase activity	20/190905	22/383722	5.52738e-05	0.000180548	7.34779e-05	OMEM6G022978.1/OGRW100G043617.1/OGRW100G047999.1/OLAW128G045167.1/OLAW128G048689.1/OMAW171G045437.1/OMAW171G048891.1/OALW18G047118.1/OALW18G043921.1/OMIW190G045757.1/OMIW190G049244.1/OAUW26G010374.1/OAUW26G024054.1/OOFW323G023874.1/OPUW363G048604.1/OPUW363G045185.1/ORHW375G023944.1/OBRW59G020948.1/OEIW71G024028.1/OGLW97G0023811.1	20
GO:0047641	aldose-6-phosphate reductase (NADPH) activity	20/190905	22/383722	5.52738e-05	0.000180548	7.34779e-05	OMEM6G06566.1/OGRW100G011795.1/OGRW100G016297.1/OLAW128G011872.1/OLAW128G016626.1/OMAW171G016469.1/OMAW171G011821.1/OALW18G017001.1/OALW18G012216.1/OMIW190G011863.1/OMIW190G016681.1/OAUW26G06422.1/OOFW323G07168.1/OPUW363G011726.1/OPUW363G016397.1/ORHW375G06149.1/OBRW59G06058.1/OBRW59G06059.1/OEIW71G06342.1/OGLW97G006434.1	20
GO:0047661	amino-acid racemase activity	20/190905	22/383722	5.52738e-05	0.000180548	7.34779e-05	OMEM6G03054.1/OGRW100G08201.1/OGRW100G02398.1/OLAW128G08067.1/OLAW128G02294.1/OMAW171G02416.1/OMAW171G02417.1/OMAW171G08291.1/OALW18G08422.1/OALW18G02407.1/OMIW190G02362.1/OMIW190G08266.1/OAUW26G02668.1/OOFW323G02900.1/OPUW363G08250.1/OPUW363G02505.1/ORHW375G02602.1/OBRW59G02748.1/OEIW71G02871.1/OGLW97G002886.1	20
GO:0050113	inositol oxygenase activity	20/190905	22/383722	5.52738e-05	0.000180548	7.34779e-05	OMEM6G025077.1/OMEM6G025119.1/OGRW100G045632.1/OGRW100G049833.1/OLAW128G047222.1/OLAW128G050499.1/OMAW171G047448.1/OMAW171G050824.1/OALW18G049125.1/OALW18G045744.1/OMIW190G047799.1/OMIW190G051239.1/OAUW26G026214.1/OOFW323G025915.1/OPUW363G050662.1/OPUW363G047125.1/ORHW375G025982.1/OBRW59G022657.1/OEIW71G026098.1/OGLW97G0026161.1	20
GO:0050126	N-carbamoylputrescine amidase activity	20/190905	22/383722	5.52738e-05	0.000180548	7.34779e-05	OMEM6G033159.1/OMEM6G08846.1/OGRW100G013853.1/OGRW100G018635.1/OLAW128G013979.1/OLAW128G018594.1/OMAW171G018567.1/OALW18G019053.1/OALW18G014237.1/OMIW190G013974.1/OMIW190G018746.1/OAUW26G08696.1/OOFW323G09260.1/OPUW363G013594.1/OPUW363G018402.1/ORHW375G08218.1/OBRW59G029852.1/OBRW59G07853.1/OEIW71G08465.1/OGLW97G008491.1	20
GO:0070860	RNA polymerase I core factor complex	20/190905	22/383722	5.52738e-05	0.000180548	7.34779e-05	OMEM6G020814.1/OGRW100G038221.1/OGRW100G041617.1/OLAW128G042930.1/OLAW128G039441.1/OMAW171G043331.1/OMAW171G039944.1/OALW18G038296.1/OALW18G041800.1/OMIW190G043644.1/OMIW190G040230.1/OMIW190G040231.1/OAUW26G021779.1/OOFW323G021648.1/OPUW363G039496.1/OPUW363G043008.1/ORHW375G021677.1/OBRW59G019069.1/OEIW71G021792.1/OGLW97G0021430.1	20
GO:0006801	superoxide metabolic process	110/190905	170/383722	5.94181e-05	0.000193741	7.88471e-05	OMEM6G014947.1/OMEM6G025410.1/OGRW100G023070.1/OGRW100G026965.1/OGRW100G057540.1/OLAW128G027805.1/OLAW128G054854.1/OLAW128G022940.1/OLAW128G057806.1/OMAW171G028159.1/OMAW171G058554.1/OMAW171G023069.1/OMAW171G055159.1/OALW18G023459.1/OALW18G027556.1/OALW18G057945.1/OMIW190G023250.1/OMIW190G055503.1/OMIW190G028243.1/OAUW26G030543.1/OOFW323G013697.1/OOFW323G030406.1/OPUW363G022939.1/OPUW363G058344.1…	110
GO:0007015	actin filament organization	217/190905	362/383722	6.16903e-05	0.000200589	8.16342e-05	OMEM6G04843.1/OGRW100G010073.1/OGRW100G04118.1/OLAW128G010006.1/OLAW128G04034.1/OMAW171G04267.1/OMAW171G010141.1/OALW18G010276.1/OALW18G04183.1/OMIW190G04275.1/OMIW190G010247.1/OAUW26G04600.1/OOFW323G04788.1/OPUW363G010072.1/OPUW363G04408.1/ORHW375G04447.1/OBRW59G04338.1/OEIW71G04721.1/OGLW97G004777.1/OMEM6G010378.1/OGRW100G015646.1/OGRW100G020534.1/OLAW128G015921.1/OLAW128G020415.1/OMAW171G02050…	217
GO:0034511	U3 snoRNA binding	38/190905	49/383722	6.17366e-05	0.000200589	8.16342e-05	OMEM6G09612.1/OGRW100G014890.1/OGRW100G019678.1/OLAW128G015091.1/OLAW128G019820.1/OMAW171G019678.1/OMAW171G014926.1/OALW18G020116.1/OALW18G015300.1/OMIW190G015057.1/OMIW190G019878.1/OAUW26G09837.1/OOFW323G010356.1/OPUW363G014913.1/OPUW363G019509.1/ORHW375G09378.1/OBRW59G08794.1/OEIW71G09546.1/OGLW97G009306.1/OMEM6G011264.1/OGRW100G024230.1/OGRW100G027949.1/OLAW128G028936.1/OLAW128G023963.1/OMAW17…	38
GO:0004140	dephospho-CoA kinase activity	22/190905	25/383722	7.10422e-05	0.000230012	9.36082e-05	OMEM6G02480.1/OGRW100G07640.1/OGRW100G01899.1/OLAW128G07501.1/OLAW128G01763.1/OMAW171G01897.1/OMAW171G01906.1/OMAW171G07796.1/OALW18G07836.1/OALW18G01911.1/OMIW190G01901.1/OMIW190G01907.1/OMIW190G07789.1/OAUW26G02116.1/OOFW323G02410.1/OPUW363G07753.1/OPUW363G07763.1/OPUW363G02008.1/ORHW375G02090.1/OBRW59G02243.1/OEIW71G02342.1/OGLW97G002228.1	22
GO:0031307	integral component of mitochondrial outer membrane	22/190905	25/383722	7.10422e-05	0.000230012	9.36082e-05	OMEM6G012571.1/OGRW100G010371.1/OGRW100G029301.1/OLAW128G010335.1/OMAW171G030594.1/OMAW171G04588.1/OMAW171G010476.1/OALW18G010590.1/OALW18G026189.1/OALW18G029982.1/OMIW190G025771.1/OMIW190G04577.1/OPUW363G010383.1/OPUW363G025411.1/OPUW363G04712.1/ORHW375G015717.1/ORHW375G04771.1/OBRW59G014150.1/OBRW59G04598.1/OEIW71G05025.1/OGLW97G0015686.1/OGLW97G005088.1	22
GO:0006614	SRP-dependent cotranslational protein targeting to membrane	158/190905	256/383722	7.72804e-05	0.000233273	9.49354e-05	OMEM6G028387.1/OMEM6G024782.1/OGRW100G045304.1/OGRW100G047637.1/OGRW100G049468.1/OLAW128G041597.1/OLAW128G046625.1/OLAW128G05667.1/OLAW128G05668.1/OLAW128G05957.1/OLAW128G08326.1/OLAW128G017838.1/OLAW128G050164.1/OMAW171G047083.1/OMAW171G050434.1/OALW18G048797.1/OALW18G013476.1/OALW18G045388.1/OMIW190G047415.1/OMIW190G050813.1/OAUW26G025794.1/OOFW323G025588.1/OPUW363G050114.1/OPUW363G046821.1/ORH…	158
GO:0008863	formate dehydrogenase (NAD+) activity	24/190905	28/383722	8.1252e-05	0.000233273	9.49354e-05	OMEM6G024607.1/OGRW100G045023.1/OGRW100G049310.1/OLAW128G046864.1/OLAW128G049965.1/OMAW171G046856.1/OMAW171G046858.1/OMAW171G050316.1/OALW18G048543.1/OALW18G048545.1/OALW18G045234.1/OMIW190G047174.1/OMIW190G047177.1/OMIW190G050710.1/OAUW26G025545.1/OOFW323G025371.1/OPUW363G050020.1/OPUW363G050022.1/OPUW363G046590.1/ORHW375G025455.1/OBRW59G022136.1/OEIW71G025478.1/OGLW97G0025434.1/OGLW97G0025435.1	24
GO:0051568	histone H3-K4 methylation	39/190905	51/383722	8.60898e-05	0.000233273	9.49354e-05	OMEM6G037442.1/OMEM6G040015.1/OGRW100G072984.1/OGRW100G077870.1/OGRW100G075505.1/OGRW100G080202.1/OLAW128G075848.1/OLAW128G080979.1/OLAW128G080988.1/OLAW128G073452.1/OMAW171G077925.1/OMAW171G080710.1/OMAW171G083210.1/OMAW171G083214.1/OALW18G073925.1/OALW18G079125.1/OALW18G076595.1/OALW18G081555.1/OMIW190G083717.1/OMIW190G081080.1/OMIW190G081084.1/OAUW26G038909.1/OAUW26G041254.1/OOFW323G042045.1/O…	39
GO:0004644	phosphoribosylglycinamide formyltransFtrase activity	26/190905	31/383722	8.62938e-05	0.000233273	9.49354e-05	OMEM6G024881.1/OMEM6G031765.1/OGRW100G060142.1/OGRW100G049577.1/OGRW100G062788.1/OLAW128G062955.1/OLAW128G050257.1/OLAW128G059994.1/OMAW171G047153.1/OMAW171G064151.1/OMAW171G061164.1/OALW18G060613.1/OALW18G045503.1/OALW18G063277.1/OMIW190G047509.1/OMIW190G061491.1/OMIW190G064478.1/OAUW26G033104.1/OOFW323G033158.1/OPUW363G050039.1/OPUW363G063881.1/OPUW363G060934.1/ORHW375G033233.1/OBRW59G028416.1/…	26
GO:0051015	actin filament binding	210/190905	351/383722	9.38433e-05	0.000233273	9.49354e-05	OMEM6G010378.1/OGRW100G015646.1/OGRW100G020534.1/OLAW128G015921.1/OLAW128G020415.1/OMAW171G020507.1/OMAW171G015765.1/OALW18G020717.1/OALW18G016178.1/OMIW190G015876.1/OMIW190G020704.1/OAUW26G010705.1/OOFW323G011133.1/OPUW363G015718.1/OPUW363G020372.1/ORHW375G010214.1/OBRW59G09503.1/OEIW71G010368.1/OGLW97G0010218.1/OGLW97G0037683.1/OMEM6G02889.1/OGRW100G07994.1/OGRW100G02186.1/OLAW128G07844.1/OLAW1…	210
GO:0046274	lignin catabolic process	253/190905	430/383722	9.5514e-05	0.000233273	9.49354e-05	OMEM6G038079.1/OMEM6G039357.1/OGRW100G073659.1/OGRW100G074908.1/OGRW100G077207.1/OLAW128G078018.1/OLAW128G078024.1/OLAW128G075203.1/OMAW171G080038.1/OMAW171G075819.1/OMAW171G077135.1/OALW18G074649.1/OALW18G075976.1/OALW18G078437.1/OMIW190G080462.1/OMIW190G076242.1/OMIW190G077608.1/OAUW26G040656.1/OAUW26G040659.1/OOFW323G039708.1/OOFW323G041159.1/OOFW323G041164.1/OPUW363G076967.1/OPUW363G079829.1/…	253
GO:0052716	hydroquinone:oxygen oxidoreductase activity	253/190905	430/383722	9.5514e-05	0.000233273	9.49354e-05	OMEM6G038079.1/OMEM6G039357.1/OGRW100G073659.1/OGRW100G074908.1/OGRW100G077207.1/OLAW128G078018.1/OLAW128G078024.1/OLAW128G075203.1/OMAW171G080038.1/OMAW171G075819.1/OMAW171G077135.1/OALW18G074649.1/OALW18G075976.1/OALW18G078437.1/OMIW190G080462.1/OMIW190G076242.1/OMIW190G077608.1/OAUW26G040656.1/OAUW26G040659.1/OOFW323G039708.1/OOFW323G041159.1/OOFW323G041164.1/OPUW363G076967.1/OPUW363G079829.1/…	253
GO:0000056	ribosomal small subunit export from nucleus	19/190905	21/383722	0.000101478	0.000233273	9.49354e-05	OMEM6G018447.1/OGRW100G035719.1/OGRW100G032372.1/OLAW128G033905.1/OLAW128G037281.1/OMAW171G037612.1/OMAW171G033821.1/OALW18G032741.1/OALW18G036351.1/OMIW190G037965.1/OMIW190G033717.1/OAUW26G019446.1/OOFW323G019261.1/OPUW363G037266.1/OPUW363G033511.1/ORHW375G019246.1/OBRW59G017057.1/OEIW71G019478.1/OGLW97G0019146.1	19
GO:0000172	ribonuclease MRP complex	19/190905	21/383722	0.000101478	0.000233273	9.49354e-05	OMEM6G039523.1/OGRW100G075082.1/OGRW100G077369.1/OLAW128G078244.1/OLAW128G075349.1/OMAW171G080211.1/OMAW171G077364.1/OALW18G076137.1/OALW18G078618.1/OMIW190G080610.1/OMIW190G077835.1/OAUW26G040803.1/OOFW323G041409.1/OPUW363G077125.1/OPUW363G080041.1/ORHW375G041870.1/OBRW59G035483.1/OEIW71G041877.1/OGLW97G0042316.1	19
GO:0000228	nuclear chromosome	19/190905	21/383722	0.000101478	0.000233273	9.49354e-05	OMEM6G019454.1/OGRW100G015216.1/OGRW100G020063.1/OLAW128G015468.1/OLAW128G019979.1/OMAW171G020033.1/OMAW171G015281.1/OALW18G020456.1/OALW18G015696.1/OMIW190G015408.1/OMIW190G020244.1/OAUW26G010216.1/OOFW323G010729.1/OPUW363G015282.1/OPUW363G019885.1/ORHW375G09753.1/OBRW59G018035.1/OEIW71G09914.1/OGLW97G009734.1	19
GO:0000347	THO complex	19/190905	21/383722	0.000101478	0.000233273	9.49354e-05	OMEM6G05788.1/OGRW100G010989.1/OGRW100G04984.1/OLAW128G010949.1/OLAW128G04909.1/OMAW171G05202.1/OMAW171G011074.1/OALW18G011198.1/OALW18G05086.1/OMIW190G05203.1/OMIW190G011188.1/OAUW26G05537.1/OOFW323G05668.1/OPUW363G010992.1/OPUW363G05308.1/ORHW375G05404.1/OBRW59G05133.1/OEIW71G05627.1/OGLW97G005692.1	19
GO:0000380	alternative mRNA splicing, via spliceosome	19/190905	21/383722	0.000101478	0.000233273	9.49354e-05	OMEM6G03939.1/OGRW100G09108.1/OGRW100G03226.1/OLAW128G08996.1/OLAW128G03151.1/OMAW171G03322.1/OMAW171G08784.1/OALW18G09299.1/OALW18G03288.1/OMIW190G03325.1/OMIW190G08786.1/OAUW26G03590.1/OOFW323G03815.1/OPUW363G09168.1/OPUW363G03441.1/ORHW375G03506.1/OBRW59G03553.1/OEIW71G03780.1/OGLW97G003838.1	19
GO:0000381	regulation of alternative mRNA splicing, via spliceosome	19/190905	21/383722	0.000101478	0.000233273	9.49354e-05	OMEM6G024279.1/OGRW100G045091.1/OGRW100G049356.1/OLAW128G046791.1/OLAW128G050032.1/OMAW171G046933.1/OMAW171G050369.1/OALW18G048608.1/OALW18G045284.1/OMIW190G047247.1/OMIW190G050757.1/OAUW26G025607.1/OOFW323G025436.1/OPUW363G050290.1/OPUW363G046653.1/ORHW375G025519.1/OBRW59G022189.1/OEIW71G025537.1/OGLW97G0025500.1	19
GO:0000386	second spliceosomal transesterification activity	19/190905	21/383722	0.000101478	0.000233273	9.49354e-05	OMEM6G029652.1/OGRW100G058016.1/OGRW100G060890.1/OLAW128G060739.1/OLAW128G058245.1/OMAW171G061973.1/OMAW171G059035.1/OALW18G058435.1/OALW18G061406.1/OMIW190G059294.1/OMIW190G062290.1/OAUW26G030992.1/OOFW323G030939.1/OPUW363G061727.1/OPUW363G058821.1/ORHW375G031012.1/OBRW59G026720.1/OEIW71G031100.1/OGLW97G0031165.1	19
GO:0000422	autophagy of mitochondrion	19/190905	21/383722	0.000101478	0.000233273	9.49354e-05	OMEM6G07041.1/OGRW100G012263.1/OGRW100G016761.1/OLAW128G012395.1/OLAW128G017069.1/OMAW171G016947.1/OMAW171G012319.1/OALW18G017385.1/OALW18G012694.1/OMIW190G012357.1/OMIW190G017212.1/OAUW26G06874.1/OOFW323G07698.1/OPUW363G012224.1/OPUW363G016870.1/ORHW375G06657.1/OBRW59G06453.1/OEIW71G06837.1/OGLW97G006926.1	19
GO:0000427	plastid-encoded plastid RNA polymerase complex	19/190905	21/383722	0.000101478	0.000233273	9.49354e-05	OMEM6G04059.1/OGRW100G09241.1/OGRW100G03355.1/OLAW128G09145.1/OLAW128G03253.1/OMAW171G03446.1/OMAW171G09309.1/OALW18G09425.1/OALW18G03418.1/OMIW190G03441.1/OMIW190G09388.1/OAUW26G03741.1/OOFW323G03948.1/OPUW363G09289.1/OPUW363G03588.1/ORHW375G03637.1/OBRW59G03672.1/OEIW71G03924.1/OGLW97G003988.1	19
GO:0000818	nuclear MIS12/MIND complex	19/190905	21/383722	0.000101478	0.000233273	9.49354e-05	OMEM6G029903.1/OGRW100G058261.1/OGRW100G061106.1/OLAW128G061018.1/OLAW128G058449.1/OMAW171G062225.1/OMAW171G059287.1/OALW18G058703.1/OALW18G061619.1/OMIW190G059536.1/OMIW190G062531.1/OAUW26G031210.1/OOFW323G031211.1/OPUW363G061964.1/OPUW363G059055.1/ORHW375G031288.1/OBRW59G026953.1/OEIW71G031380.1/OGLW97G0031424.1	19
GO:0000930	gamma-tubulin complex	19/190905	21/383722	0.000101478	0.000233273	9.49354e-05	OMEM6G019603.1/OGRW100G037002.1/OGRW100G040614.1/OLAW128G041833.1/OLAW128G038449.1/OMAW171G042319.1/OMAW171G038896.1/OALW18G037180.1/OALW18G040749.1/OMIW190G042558.1/OMIW190G039209.1/OAUW26G020717.1/OOFW323G020621.1/OPUW363G038471.1/OPUW363G041936.1/ORHW375G020621.1/OBRW59G018168.1/OEIW71G020768.1/OGLW97G0020211.1	19
GO:0001682	tRNA 5'-leader removal	19/190905	21/383722	0.000101478	0.000233273	9.49354e-05	OMEM6G039523.1/OGRW100G075082.1/OGRW100G077369.1/OLAW128G078244.1/OLAW128G075349.1/OMAW171G080211.1/OMAW171G077364.1/OALW18G076137.1/OALW18G078618.1/OMIW190G080610.1/OMIW190G077835.1/OAUW26G040803.1/OOFW323G041409.1/OPUW363G077125.1/OPUW363G080041.1/ORHW375G041870.1/OBRW59G035483.1/OEIW71G041877.1/OGLW97G0042316.1	19
GO:0001731	formation of translation preinitiation complex	19/190905	21/383722	0.000101478	0.000233273	9.49354e-05	OMEM6G08996.1/OGRW100G014026.1/OGRW100G018806.1/OLAW128G014152.1/OLAW128G018766.1/OMAW171G018783.1/OMAW171G014044.1/OALW18G019242.1/OALW18G014408.1/OMIW190G014159.1/OMIW190G018946.1/OAUW26G08877.1/OOFW323G09462.1/OPUW363G013405.1/OPUW363G018608.1/ORHW375G08416.1/OBRW59G08002.1/OEIW71G08645.1/OGLW97G008619.1	19
GO:0002100	tRNA wobble adenosine to inosine editing	19/190905	21/383722	0.000101478	0.000233273	9.49354e-05	OMEM6G024624.1/OGRW100G045007.1/OGRW100G049297.1/OLAW128G046880.1/OLAW128G049902.1/OMAW171G046841.1/OMAW171G050305.1/OALW18G048528.1/OALW18G045222.1/OMIW190G047162.1/OMIW190G050696.1/OAUW26G025527.1/OOFW323G025355.1/OPUW363G050007.1/OPUW363G046578.1/ORHW375G025438.1/OBRW59G022117.1/OEIW71G025465.1/OGLW97G0025417.1	19
GO:0002943	tRNA dihydrouridine synthesis	19/190905	21/383722	0.000101478	0.000233273	9.49354e-05	OMEM6G016281.1/OGRW100G033496.1/OGRW100G030299.1/OLAW128G031610.1/OLAW128G035222.1/OMAW171G035324.1/OMAW171G031662.1/OALW18G030420.1/OALW18G034225.1/OMIW190G035739.1/OMIW190G031977.1/OAUW26G017170.1/OOFW323G017033.1/OPUW363G035080.1/OPUW363G031341.1/ORHW375G016933.1/OBRW59G015171.1/OEIW71G017168.1/OGLW97G0016964.1	19
GO:0003352	regulation of cilium movement	19/190905	21/383722	0.000101478	0.000233273	9.49354e-05	OMEM6G019337.1/OGRW100G036696.1/OGRW100G040327.1/OLAW128G041504.1/OLAW128G038175.1/OMAW171G042033.1/OMAW171G038561.1/OALW18G036862.1/OALW18G040467.1/OMIW190G042316.1/OMIW190G038921.1/OAUW26G020407.1/OOFW323G020294.1/OPUW363G038181.1/OPUW363G041630.1/ORHW375G020298.1/OBRW59G017869.1/OEIW71G020445.1/OGLW97G0019894.1	19
GO:0003825	alpha,alpha-trehalose-phosphate synthase (UDP-forming) activity	19/190905	21/383722	0.000101478	0.000233273	9.49354e-05	OMEM6G022028.1/OGRW100G039458.1/OGRW100G042775.1/OLAW128G044204.1/OLAW128G040552.1/OMAW171G044558.1/OMAW171G041124.1/OALW18G039560.1/OALW18G042998.1/OMIW190G044917.1/OMIW190G041409.1/OAUW26G023164.1/OOFW323G022862.1/OPUW363G040764.1/OPUW363G044236.1/ORHW375G022916.1/OBRW59G020140.1/OEIW71G023054.1/OGLW97G0022811.1	19
GO:0003861	3-isopropylmalate dehydratase activity	19/190905	21/383722	0.000101478	0.000233273	9.49354e-05	OMEM6G06581.1/OGRW100G011805.1/OGRW100G016310.1/OLAW128G011885.1/OLAW128G016638.1/OMAW171G016484.1/OMAW171G011837.1/OALW18G017012.1/OALW18G012231.1/OMIW190G011875.1/OMIW190G016694.1/OAUW26G06434.1/OOFW323G07181.1/OPUW363G011738.1/OPUW363G016410.1/ORHW375G06162.1/OBRW59G06074.1/OEIW71G06357.1/OGLW97G006452.1	19
GO:0003866	3-phosphoshikimate 1-carboxyvinyltransFtrase activity	19/190905	21/383722	0.000101478	0.000233273	9.49354e-05	OMEM6G022998.1/OGRW100G043634.1/OGRW100G048017.1/OLAW128G045184.1/OLAW128G048705.1/OMAW171G045454.1/OMAW171G048909.1/OALW18G047136.1/OALW18G043937.1/OMIW190G045773.1/OMIW190G049259.1/OAUW26G024069.1/OOFW323G023892.1/OPUW363G048620.1/OPUW363G045199.1/ORHW375G023961.1/OBRW59G020966.1/OEIW71G024046.1/OGLW97G0023831.1	19
GO:0003913	DNA photolyase activity	19/190905	21/383722	0.000101478	0.000233273	9.49354e-05	OMEM6G025758.1/OGRW100G046210.1/OGRW100G050435.1/OLAW128G047856.1/OLAW128G051044.1/OMAW171G048069.1/OMAW171G051472.1/OALW18G049719.1/OALW18G046326.1/OMIW190G048421.1/OMIW190G051860.1/OAUW26G026845.1/OOFW323G026528.1/OPUW363G051297.1/OPUW363G047803.1/ORHW375G026602.1/OBRW59G023227.1/OEIW71G026726.1/OGLW97G0026842.1	19
GO:0003919	FMN adenylyltransFtrase activity	19/190905	21/383722	0.000101478	0.000233273	9.49354e-05	OMEM6G012465.1/OGRW100G025576.1/OGRW100G029211.1/OLAW128G030391.1/OLAW128G025218.1/OMAW171G030503.1/OMAW171G025554.1/OALW18G026096.1/OALW18G029939.1/OMIW190G025679.1/OMIW190G030790.1/OAUW26G015955.1/OOFW323G016125.1/OPUW363G025316.1/OPUW363G030213.1/ORHW375G015630.1/OBRW59G014075.1/OEIW71G015952.1/OGLW97G0015606.1	19
GO:0003923	GPI-anchor transamidase activity	19/190905	21/383722	0.000101478	0.000233273	9.49354e-05	OMEM6G07369.1/OGRW100G012600.1/OGRW100G017102.1/OLAW128G012731.1/OLAW128G017387.1/OMAW171G017284.1/OMAW171G012715.1/OALW18G017790.1/OALW18G013006.1/OMIW190G012678.1/OMIW190G017578.1/OAUW26G07230.1/OOFW323G08076.1/OPUW363G012555.1/OPUW363G017224.1/ORHW375G07016.1/OBRW59G06749.1/OEIW71G07205.1/OGLW97G007294.1	19
GO:0003937	IMP cyclohydrolase activity	19/190905	21/383722	0.000101478	0.000233273	9.49354e-05	OMEM6G030140.1/OGRW100G058543.1/OGRW100G061322.1/OLAW128G061323.1/OLAW128G058658.1/OMAW171G062511.1/OMAW171G059553.1/OALW18G058996.1/OALW18G061860.1/OMIW190G059817.1/OMIW190G062819.1/OAUW26G031450.1/OOFW323G031501.1/OPUW363G062226.1/OPUW363G059346.1/ORHW375G031599.1/OBRW59G027154.1/OEIW71G031698.1/OGLW97G0031732.1	19
GO:0003938	IMP dehydrogenase activity	19/190905	21/383722	0.000101478	0.000233273	9.49354e-05	OMEM6G012281.1/OGRW100G025391.1/OGRW100G029022.1/OLAW128G030210.1/OLAW128G025042.1/OMAW171G030379.1/OMAW171G025362.1/OALW18G025892.1/OALW18G029684.1/OMIW190G025483.1/OMIW190G030619.1/OAUW26G015763.1/OOFW323G015933.1/OPUW363G025141.1/OPUW363G030033.1/ORHW375G015425.1/OBRW59G013904.1/OEIW71G015753.1/OGLW97G0015410.1	19
GO:0003975	UDP-N-acetylglucosamine-dolichyl-phosphate N-acetylglucosaminephosphotransFtrase activity	19/190905	21/383722	0.000101478	0.000233273	9.49354e-05	OMEM6G029130.1/OGRW100G054064.1/OGRW100G057511.1/OLAW128G054820.1/OLAW128G057771.1/OMAW171G058523.1/OMAW171G055126.1/OALW18G054408.1/OALW18G057910.1/OMIW190G055473.1/OMIW190G058759.1/OAUW26G030513.1/OOFW323G030371.1/OPUW363G058310.1/OPUW363G054912.1/ORHW375G030421.1/OBRW59G026252.1/OEIW71G030573.1/OGLW97G0030736.1	19
GO:0004013	adenosylhomocysteinase activity	19/190905	21/383722	0.000101478	0.000233273	9.49354e-05	OMEM6G038507.1/OGRW100G074092.1/OGRW100G076420.1/OLAW128G077033.1/OLAW128G074418.1/OMAW171G079332.1/OMAW171G076162.1/OALW18G075072.1/OALW18G077586.1/OMIW190G079787.1/OMIW190G076591.1/OAUW26G039869.1/OOFW323G040112.1/OPUW363G076053.1/OPUW363G078823.1/ORHW375G040535.1/OBRW59G034691.1/OEIW71G040559.1/OGLW97G0041115.1	19
GO:0004018	N6-(1,2-dicarboxyethyl)AMP AMP-lyase (fumarate-forming) activity	19/190905	21/383722	0.000101478	0.000233273	9.49354e-05	OMEM6G014674.1/OGRW100G022826.1/OGRW100G026717.1/OLAW128G027537.1/OLAW128G022679.1/OMAW171G027901.1/OMAW171G022797.1/OALW18G023208.1/OALW18G027291.1/OMIW190G022988.1/OMIW190G027995.1/OAUW26G013021.1/OOFW323G013449.1/OPUW363G022683.1/OPUW363G027569.1/ORHW375G012645.1/OBRW59G011747.1/OEIW71G012761.1/OGLW97G0012574.1	19
GO:0004070	aspartate carbamoyltransFtrase activity	19/190905	21/383722	0.000101478	0.000233273	9.49354e-05	OMEM6G030245.1/OGRW100G058725.1/OGRW100G061477.1/OLAW128G062046.1/OLAW128G058795.1/OMAW171G062696.1/OMAW171G059755.1/OALW18G059192.1/OALW18G061974.1/OMIW190G060005.1/OMIW190G063027.1/OAUW26G031624.1/OOFW323G031687.1/OPUW363G062404.1/OPUW363G059537.1/ORHW375G031814.1/OBRW59G027278.1/OEIW71G031870.1/OGLW97G0031927.1	19
GO:0004112	cyclic-nucleotide phosphodiesterase activity	19/190905	21/383722	0.000101478	0.000233273	9.49354e-05	OMEM6G022022.1/OGRW100G039453.1/OGRW100G042771.1/OLAW128G044199.1/OLAW128G040548.1/OMAW171G044554.1/OMAW171G041117.1/OALW18G039555.1/OALW18G042992.1/OMIW190G044914.1/OMIW190G041404.1/OAUW26G023160.1/OOFW323G022857.1/OPUW363G040759.1/OPUW363G044230.1/ORHW375G022909.1/OBRW59G020135.1/OEIW71G023047.1/OGLW97G0022806.1	19
GO:0004121	cystathionine beta-lyase activity	19/190905	21/383722	0.000101478	0.000233273	9.49354e-05	OMEM6G023312.1/OGRW100G043991.1/OGRW100G048347.1/OLAW128G045521.1/OLAW128G045531.1/OLAW128G049010.1/OMAW171G049254.1/OALW18G047499.1/OALW18G044276.1/OMIW190G046113.1/OMIW190G049619.1/OAUW26G024389.1/OOFW323G024262.1/OPUW363G048950.1/OPUW363G045547.1/ORHW375G024322.1/OBRW59G021259.1/OEIW71G024378.1/OGLW97G0024228.1	19
GO:0004163	diphosphomevalonate decarboxylase activity	19/190905	21/383722	0.000101478	0.000233273	9.49354e-05	OMEM6G06420.1/OGRW100G011652.1/OGRW100G016178.1/OLAW128G011731.1/OLAW128G016519.1/OMAW171G016355.1/OMAW171G011676.1/OALW18G016854.1/OALW18G012095.1/OMIW190G011746.1/OMIW190G016551.1/OAUW26G06305.1/OOFW323G07031.1/OPUW363G011599.1/OPUW363G016264.1/ORHW375G06018.1/OBRW59G05933.1/OEIW71G06207.1/OGLW97G006302.1	19
GO:0004164	diphthine synthase activity	19/190905	21/383722	0.000101478	0.000233273	9.49354e-05	OMEM6G014990.1/OGRW100G023103.1/OGRW100G027000.1/OLAW128G027842.1/OLAW128G022973.1/OMAW171G028191.1/OMAW171G023099.1/OALW18G023495.1/OALW18G027588.1/OMIW190G023279.1/OMIW190G028269.1/OAUW26G013350.1/OOFW323G013721.1/OPUW363G022975.1/OPUW363G027860.1/ORHW375G012944.1/OBRW59G012021.1/OEIW71G013061.1/OGLW97G0012917.1	19
GO:0004198	calcium-dependent cysteine-type endopeptidase activity	19/190905	21/383722	0.000101478	0.000233273	9.49354e-05	OMEM6G09836.1/OGRW100G015117.1/OGRW100G019920.1/OLAW128G015333.1/OLAW128G019578.1/OMAW171G019913.1/OMAW171G015156.1/OALW18G020341.1/OALW18G015551.1/OMIW190G015285.1/OMIW190G020121.1/OAUW26G010089.1/OOFW323G010597.1/OPUW363G015150.1/OPUW363G019751.1/ORHW375G09624.1/OBRW59G09010.1/OEIW71G09782.1/OGLW97G009615.1	19
GO:0004314	[acyl-carrier-protein] S-malonyltransFtrase activity	19/190905	21/383722	0.000101478	0.000233273	9.49354e-05	OMEM6G014538.1/OGRW100G022700.1/OGRW100G07191.1/OLAW128G027402.1/OLAW128G022554.1/OMAW171G027773.1/OMAW171G022674.1/OALW18G023079.1/OALW18G07379.1/OMIW190G022870.1/OMIW190G027871.1/OAUW26G012878.1/OOFW323G013334.1/OPUW363G022560.1/OPUW363G027449.1/ORHW375G012518.1/OBRW59G011626.1/OEIW71G012636.1/OGLW97G0012432.1	19
GO:0004371	glycerone kinase activity	19/190905	21/383722	0.000101478	0.000233273	9.49354e-05	OMEM6G011822.1/OGRW100G024896.1/OGRW100G028572.1/OLAW128G029666.1/OLAW128G024590.1/OMAW171G029877.1/OMAW171G024854.1/OALW18G025389.1/OALW18G029220.1/OMIW190G025010.1/OMIW190G030093.1/OAUW26G015287.1/OOFW323G015425.1/OPUW363G024646.1/OPUW363G029527.1/ORHW375G014898.1/OBRW59G013465.1/OEIW71G015222.1/OGLW97G0014890.1	19
GO:0004377	GDP-Man:Man3GlcNAc2-PP-Dol alpha-1,2-mannosyltransFtrase activity	19/190905	21/383722	0.000101478	0.000233273	9.49354e-05	OMEM6G041612.1/OGRW100G079461.1/OGRW100G081608.1/OLAW128G082712.1/OLAW128G080230.1/OMAW171G082404.1/OMAW171G084840.1/OALW18G080805.1/OALW18G083067.1/OMIW190G085436.1/OMIW190G082950.1/OAUW26G043057.1/OOFW323G043747.1/OPUW363G082333.1/OPUW363G084866.1/ORHW375G044168.1/OBRW59G037374.1/OEIW71G044274.1/OGLW97G0044916.1	19
GO:0004378	GDP-Man:Man1GlcNAc2-PP-Dol alpha-1,3-mannosyltransFtrase activity	19/190905	21/383722	0.000101478	0.000233273	9.49354e-05	OMEM6G01240.1/OMEM6G018302.1/OMEM6G036722.1/OGRW100G032244.1/OLAW128G033764.1/OLAW128G037141.1/OMAW171G037449.1/OMAW171G033688.1/OALW18G032589.1/OALW18G036216.1/OMIW190G037812.1/OMIW190G033858.1/OAUW26G019298.1/OAUW26G034304.1/OOFW323G019118.1/OPUW363G037119.1/ORHW375G019091.1/OBRW59G016918.1/OGLW97G0019007.1	19
GO:0004400	histidinol-phosphate transaminase activity	19/190905	21/383722	0.000101478	0.000233273	9.49354e-05	OMEM6G09834.1/OGRW100G015115.1/OGRW100G019917.1/OLAW128G015329.1/OLAW128G019580.1/OMAW171G019911.1/OMAW171G015154.1/OALW18G020338.1/OALW18G015546.1/OMIW190G015284.1/OMIW190G020119.1/OAUW26G010080.1/OOFW323G010594.1/OPUW363G015147.1/OPUW363G019748.1/ORHW375G09620.1/OBRW59G09007.1/OEIW71G09779.1/OGLW97G009610.1	19
GO:0004401	histidinol-phosphatase activity	19/190905	21/383722	0.000101478	0.000233273	9.49354e-05	OMEM6G01995.1/OGRW100G046463.1/OGRW100G01337.1/OLAW128G06885.1/OLAW128G01216.1/OMAW171G01274.1/OMAW171G07200.1/OALW18G049980.1/OALW18G01344.1/OMIW190G01247.1/OMIW190G07167.1/OAUW26G01382.1/OOFW323G01799.1/OPUW363G07116.1/OPUW363G01345.1/ORHW375G01450.1/OBRW59G01690.1/OEIW71G01671.1/OGLW97G0028136.1	19
GO:0004411	homogentisate 1,2-dioxygenase activity	19/190905	21/383722	0.000101478	0.000233273	9.49354e-05	OMEM6G022783.1/OGRW100G043420.1/OGRW100G047786.1/OLAW128G044949.1/OLAW128G048480.1/OMAW171G045223.1/OMAW171G048669.1/OALW18G046919.1/OALW18G043703.1/OMIW190G045568.1/OMIW190G049004.1/OAUW26G023846.1/OOFW323G023641.1/OPUW363G048402.1/OPUW363G044956.1/ORHW375G023714.1/OBRW59G020754.1/OEIW71G023817.1/OGLW97G0023592.1	19
GO:0004418	hydroxymethylbilane synthase activity	19/190905	21/383722	0.000101478	0.000233273	9.49354e-05	OMEM6G06930.1/OGRW100G012161.1/OGRW100G016672.1/OLAW128G012272.1/OLAW128G016977.1/OMAW171G016842.1/OMAW171G012218.1/OALW18G017483.1/OALW18G012595.1/OMIW190G012239.1/OMIW190G017106.1/OAUW26G06776.1/OOFW323G07580.1/OPUW363G012117.1/OPUW363G016776.1/ORHW375G06562.1/OBRW59G06364.1/OEIW71G06737.1/OGLW97G006821.1	19
GO:0004419	hydroxymethylglutaryl-CoA lyase activity	19/190905	21/383722	0.000101478	0.000233273	9.49354e-05	OMEM6G02045.1/OGRW100G046399.1/OGRW100G01399.1/OLAW128G06941.1/OLAW128G01275.1/OMAW171G01333.1/OMAW171G07262.1/OALW18G049917.1/OALW18G01406.1/OMIW190G01309.1/OMIW190G07231.1/OAUW26G01454.1/OOFW323G01866.1/OPUW363G07181.1/OPUW363G01418.1/ORHW375G01513.1/OBRW59G01750.1/OEIW71G01746.1/OGLW97G001599.1	19
GO:0004424	imidazoleglycerol-phosphate dehydratase activity	19/190905	21/383722	0.000101478	0.000233273	9.49354e-05	OMEM6G018528.1/OGRW100G035835.1/OGRW100G032455.1/OLAW128G034011.1/OLAW128G037365.1/OMAW171G037714.1/OMAW171G033926.1/OALW18G032864.1/OALW18G036431.1/OMIW190G038061.1/OMIW190G033609.1/OAUW26G019546.1/OOFW323G019366.1/OPUW363G037358.1/OPUW363G033626.1/ORHW375G019359.1/OBRW59G017134.1/OEIW71G019582.1/OGLW97G0019213.1	19
GO:0004479	methionyl-tRNA formyltransFtrase activity	19/190905	21/383722	0.000101478	0.000233273	9.49354e-05	OMEM6G03936.1/OGRW100G09105.1/OGRW100G03223.1/OLAW128G08991.1/OLAW128G03153.1/OMAW171G03320.1/OMAW171G08787.1/OALW18G09294.1/OALW18G03284.1/OMIW190G03323.1/OMIW190G08789.1/OAUW26G03587.1/OOFW323G03812.1/OPUW363G09163.1/OPUW363G03437.1/ORHW375G03504.1/OBRW59G03552.1/OEIW71G03775.1/OGLW97G003837.1	19
GO:0004489	methylenetetrahydrofolate reductase (NAD(P)H) activity	19/190905	21/383722	0.000101478	0.000233273	9.49354e-05	OMEM6G012592.1/OGRW100G025695.1/OGRW100G029331.1/OLAW128G030509.1/OLAW128G025340.1/OMAW171G030618.1/OMAW171G025854.1/OALW18G026212.1/OALW18G030009.1/OMIW190G025798.1/OMIW190G031106.1/OAUW26G016069.1/OOFW323G016239.1/OPUW363G025438.1/OPUW363G030331.1/ORHW375G015744.1/OBRW59G014179.1/OEIW71G016062.1/OGLW97G0015718.1	19
GO:0004573	mannosyl-oligosaccharide glucosidase activity	19/190905	21/383722	0.000101478	0.000233273	9.49354e-05	OMEM6G05832.1/OGRW100G011039.1/OGRW100G05027.1/OLAW128G010991.1/OLAW128G04948.1/OMAW171G05242.1/OMAW171G011110.1/OALW18G011245.1/OALW18G05129.1/OMIW190G05256.1/OMIW190G011230.1/OAUW26G05597.1/OOFW323G05738.1/OPUW363G011027.1/OPUW363G05347.1/ORHW375G05449.1/OBRW59G05179.1/OEIW71G05674.1/OGLW97G005728.1	19
GO:0004610	phosphoacetylglucosamine mutase activity	19/190905	21/383722	0.000101478	0.000233273	9.49354e-05	OMEM6G026780.1/OGRW100G051713.1/OGRW100G055391.1/OLAW128G052382.1/OLAW128G055754.1/OMAW171G056206.1/OMAW171G052813.1/OALW18G052121.1/OALW18G055747.1/OMIW190G053194.1/OMIW190G056478.1/OAUW26G028065.1/OOFW323G027985.1/OPUW363G055959.1/OPUW363G052627.1/ORHW375G028058.1/OBRW59G024267.1/OEIW71G028164.1/OGLW97G0028177.1	19
GO:0004631	phosphomevalonate kinase activity	19/190905	21/383722	0.000101478	0.000233273	9.49354e-05	OMEM6G014174.1/OGRW100G022331.1/OGRW100G06847.1/OLAW128G027006.1/OLAW128G022203.1/OMAW171G027392.1/OMAW171G022264.1/OALW18G022694.1/OALW18G07019.1/OMIW190G022505.1/OMIW190G027478.1/OAUW26G012506.1/OOFW323G012932.1/OPUW363G022207.1/OPUW363G027078.1/ORHW375G012136.1/OBRW59G011305.1/OEIW71G012254.1/OGLW97G0012050.1	19
GO:0004635	phosphoribosyl-AMP cyclohydrolase activity	19/190905	21/383722	0.000101478	0.000233273	9.49354e-05	OMEM6G02077.1/OGRW100G046348.1/OGRW100G01460.1/OLAW128G06989.1/OLAW128G01326.1/OMAW171G01405.1/OMAW171G07308.1/OALW18G049866.1/OALW18G01472.1/OMIW190G01385.1/OMIW190G07283.1/OAUW26G01514.1/OOFW323G01907.1/OPUW363G07245.1/OPUW363G01464.1/ORHW375G01564.1/OBRW59G01798.1/OEIW71G01797.1/OGLW97G001678.1	19
GO:0004636	phosphoribosyl-ATP diphosphatase activity	19/190905	21/383722	0.000101478	0.000233273	9.49354e-05	OMEM6G02077.1/OGRW100G046348.1/OGRW100G01460.1/OLAW128G06989.1/OLAW128G01326.1/OMAW171G01405.1/OMAW171G07308.1/OALW18G049866.1/OALW18G01472.1/OMIW190G01385.1/OMIW190G07283.1/OAUW26G01514.1/OOFW323G01907.1/OPUW363G07245.1/OPUW363G01464.1/ORHW375G01564.1/OBRW59G01798.1/OEIW71G01797.1/OGLW97G001678.1	19
GO:0004639	phosphoribosylaminoimidazolesuccinocarboxamide synthase activity	19/190905	21/383722	0.000101478	0.000233273	9.49354e-05	OMEM6G033848.1/OGRW100G064881.1/OGRW100G067239.1/OLAW128G067408.1/OLAW128G064913.1/OMAW171G066389.1/OMAW171G068783.1/OALW18G067866.1/OALW18G065296.1/OMIW190G069259.1/OMIW190G066553.1/OAUW26G035163.1/OOFW323G034999.1/OPUW363G068673.1/OPUW363G066050.1/ORHW375G035336.1/OBRW59G030286.1/OEIW71G035674.1/OGLW97G0035872.1	19
GO:0004643	phosphoribosylaminoimidazolecarboxamide formyltransFtrase activity	19/190905	21/383722	0.000101478	0.000233273	9.49354e-05	OMEM6G030140.1/OGRW100G058543.1/OGRW100G061322.1/OLAW128G061323.1/OLAW128G058658.1/OMAW171G062511.1/OMAW171G059553.1/OALW18G058996.1/OALW18G061860.1/OMIW190G059817.1/OMIW190G062819.1/OAUW26G031450.1/OOFW323G031501.1/OPUW363G062226.1/OPUW363G059346.1/ORHW375G031599.1/OBRW59G027154.1/OEIW71G031698.1/OGLW97G0031732.1	19
GO:0004663	Rab geranylgeranyltransFtrase activity	19/190905	21/383722	0.000101478	0.000233273	9.49354e-05	OMEM6G031847.1/OGRW100G060224.1/OGRW100G062869.1/OLAW128G063058.1/OLAW128G060064.1/OMAW171G064246.1/OMAW171G061254.1/OALW18G060705.1/OALW18G063365.1/OMIW190G061594.1/OMIW190G064572.1/OAUW26G033176.1/OOFW323G033261.1/OPUW363G063975.1/OPUW363G061023.1/ORHW375G033337.1/OBRW59G028481.1/OEIW71G033486.1/OGLW97G0033667.1	19
GO:0004671	protein C-terminal S-isoprenylcysteine carboxyl O-methyltransFtrase activity	19/190905	21/383722	0.000101478	0.000233273	9.49354e-05	OMEM6G018398.1/OGRW100G035669.1/OGRW100G032334.1/OLAW128G033857.1/OLAW128G037242.1/OMAW171G037565.1/OMAW171G033777.1/OALW18G032687.1/OALW18G036312.1/OMIW190G037923.1/OMIW190G033766.1/OAUW26G019407.1/OOFW323G019207.1/OPUW363G037224.1/OPUW363G033465.1/ORHW375G019195.1/OBRW59G017013.1/OEIW71G019434.1/OGLW97G0019103.1	19
GO:0004712	protein serine/threonine/tyrosine kinase activity	19/190905	21/383722	0.000101478	0.000233273	9.49354e-05	OMEM6G011709.1/OGRW100G024761.1/OGRW100G028458.1/OLAW128G029518.1/OLAW128G024476.1/OMAW171G029758.1/OMAW171G024718.1/OALW18G025244.1/OALW18G029108.1/OMIW190G024898.1/OMIW190G029965.1/OAUW26G015145.1/OOFW323G015290.1/OPUW363G024535.1/OPUW363G029403.1/ORHW375G014765.1/OBRW59G013357.1/OEIW71G015084.1/OGLW97G0014767.1	19
GO:0004747	ribokinase activity	19/190905	21/383722	0.000101478	0.000233273	9.49354e-05	OMEM6G03770.1/OGRW100G08934.1/OGRW100G03078.1/OLAW128G08831.1/OLAW128G02968.1/OMAW171G03156.1/OMAW171G08947.1/OALW18G09140.1/OALW18G03124.1/OMIW190G03169.1/OMIW190G08947.1/OAUW26G03411.1/OOFW323G03655.1/OPUW363G08985.1/OPUW363G03276.1/ORHW375G03345.1/OBRW59G03391.1/OEIW71G03606.1/OGLW97G003670.1	19
GO:0004798	thymidylate kinase activity	19/190905	21/383722	0.000101478	0.000233273	9.49354e-05	OMEM6G028964.1/OGRW100G053916.1/OGRW100G057390.1/OLAW128G054678.1/OLAW128G057642.1/OMAW171G058385.1/OMAW171G054956.1/OALW18G054253.1/OALW18G057781.1/OMIW190G055334.1/OMIW190G058600.1/OAUW26G030384.1/OOFW323G030107.1/OPUW363G058174.1/OPUW363G054752.1/ORHW375G030247.1/OBRW59G026129.1/OEIW71G030428.1/OGLW97G0030611.1	19
GO:0004848	ureidoglycolate hydrolase activity	19/190905	21/383722	0.000101478	0.000233273	9.49354e-05	OMEM6G05057.1/OGRW100G010273.1/OGRW100G04319.1/OLAW128G010237.1/OLAW128G04246.1/OMAW171G04480.1/OMAW171G010383.1/OALW18G010491.1/OALW18G04398.1/OMIW190G04482.1/OMIW190G010490.1/OAUW26G04824.1/OOFW323G05010.1/OPUW363G010275.1/OPUW363G04620.1/ORHW375G04667.1/OBRW59G04522.1/OEIW71G04934.1/OGLW97G004993.1	19
GO:0004888	transmembrane signaling receptor activity	19/190905	21/383722	0.000101478	0.000233273	9.49354e-05	OMEM6G023502.1/OGRW100G044159.1/OGRW100G048512.1/OLAW128G045710.1/OLAW128G049177.1/OMAW171G045953.1/OMAW171G049429.1/OALW18G047673.1/OALW18G044455.1/OMIW190G046281.1/OMIW190G049787.1/OAUW26G024590.1/OOFW323G024437.1/OPUW363G049098.1/OPUW363G045714.1/ORHW375G024507.1/OBRW59G021417.1/OEIW71G024559.1/OGLW97G0024424.1	19
GO:0005345	purine nucleobase transmembrane transporter activity	19/190905	21/383722	0.000101478	0.000233273	9.49354e-05	OMEM6G038376.1/OGRW100G074006.1/OGRW100G076324.1/OLAW128G076931.1/OLAW128G074277.1/OMAW171G078973.1/OMAW171G076044.1/OALW18G074976.1/OALW18G077454.1/OMIW190G079393.1/OMIW190G076443.1/OAUW26G039716.1/OOFW323G039978.1/OPUW363G075925.1/OPUW363G078684.1/ORHW375G040437.1/OBRW59G034549.1/OEIW71G040451.1/OGLW97G0040950.1	19
GO:0005655	nucleolar ribonuclease P complex	19/190905	21/383722	0.000101478	0.000233273	9.49354e-05	OMEM6G039523.1/OGRW100G075082.1/OGRW100G077369.1/OLAW128G078244.1/OLAW128G075349.1/OMAW171G080211.1/OMAW171G077364.1/OALW18G076137.1/OALW18G078618.1/OMIW190G080610.1/OMIW190G077835.1/OAUW26G040803.1/OOFW323G041409.1/OPUW363G077125.1/OPUW363G080041.1/ORHW375G041870.1/OBRW59G035483.1/OEIW71G041877.1/OGLW97G0042316.1	19
GO:0005751	mitochondrial respiratory chain complex IV	19/190905	21/383722	0.000101478	0.000233273	9.49354e-05	OMEM6G012227.1/OGRW100G025335.1/OGRW100G028979.1/OLAW128G030149.1/OLAW128G024987.1/OMAW171G030311.1/OMAW171G025303.1/OALW18G025833.1/OALW18G029634.1/OMIW190G025423.1/OMIW190G030557.1/OAUW26G015702.1/OOFW323G015873.1/OPUW363G025072.1/OPUW363G029978.1/ORHW375G015362.1/OBRW59G013857.1/OEIW71G015695.1/OGLW97G0015354.1	19
GO:0005769	early endosome	19/190905	21/383722	0.000101478	0.000233273	9.49354e-05	OMEM6G011789.1/OGRW100G024860.1/OGRW100G028535.1/OLAW128G029629.1/OLAW128G024553.1/OMAW171G029841.1/OMAW171G024813.1/OALW18G025353.1/OALW18G029184.1/OMIW190G024978.1/OMIW190G030056.1/OAUW26G015244.1/OOFW323G015384.1/OPUW363G024608.1/OPUW363G029487.1/ORHW375G014858.1/OBRW59G013436.1/OEIW71G015180.1/OGLW97G0014854.1	19
GO:0005795	Golgi stack	19/190905	21/383722	0.000101478	0.000233273	9.49354e-05	OMEM6G010537.1/OGRW100G015809.1/OGRW100G020712.1/OLAW128G016124.1/OLAW128G020588.1/OMAW171G020675.1/OMAW171G015961.1/OALW18G021056.1/OALW18G016356.1/OMIW190G016044.1/OMIW190G020883.1/OAUW26G010876.1/OOFW323G011311.1/OPUW363G015876.1/OPUW363G020557.1/ORHW375G010399.1/OBRW59G09669.1/OEIW71G010555.1/OGLW97G0010396.1	19
GO:0005802	trans-Golgi network	19/190905	21/383722	0.000101478	0.000233273	9.49354e-05	OMEM6G02892.1/OGRW100G07989.1/OGRW100G02183.1/OLAW128G07840.1/OLAW128G02064.1/OMAW171G02211.1/OMAW171G08081.1/OALW18G08186.1/OALW18G02196.1/OMIW190G02190.1/OMIW190G08076.1/OAUW26G02454.1/OOFW323G02700.1/OPUW363G08050.1/OPUW363G02324.1/ORHW375G02415.1/OBRW59G02542.1/OEIW71G02680.1/OGLW97G002659.1	19
GO:0005847	mRNA cleavage and polyadenylation specificity factor complex	19/190905	21/383722	0.000101478	0.000233273	9.49354e-05	OMEM6G034700.1/OGRW100G065807.1/OGRW100G068051.1/OLAW128G068340.1/OLAW128G065764.1/OMAW171G02436.1/OMAW171G069728.1/OALW18G068784.1/OALW18G066132.1/OMIW190G02415.1/OMIW190G067463.1/OAUW26G035984.1/OOFW323G035924.1/OPUW363G08269.1/OPUW363G066930.1/ORHW375G036230.1/OBRW59G031089.1/OEIW71G036581.1/OGLW97G0036730.1	19
GO:0005965	protein farnesyltransFtrase complex	19/190905	21/383722	0.000101478	0.000233273	9.49354e-05	OMEM6G04304.1/OGRW100G09510.1/OGRW100G03586.1/OLAW128G09422.1/OLAW128G03484.1/OMAW171G03694.1/OMAW171G09594.1/OALW18G09698.1/OALW18G03656.1/OMIW190G03691.1/OMIW190G09685.1/OAUW26G04010.1/OOFW323G04232.1/OPUW363G09540.1/OPUW363G03857.1/ORHW375G03914.1/OBRW59G03883.1/OEIW71G04201.1/OGLW97G004252.1	19
GO:0005983	starch catabolic process	19/190905	21/383722	0.000101478	0.000233273	9.49354e-05	OMEM6G031012.1/OGRW100G059449.1/OGRW100G062113.1/OLAW128G062179.1/OLAW128G059321.1/OMAW171G063351.1/OMAW171G060400.1/OALW18G059888.1/OALW18G062561.1/OMIW190G060685.1/OMIW190G063713.1/OAUW26G032313.1/OOFW323G032430.1/OPUW363G063106.1/OPUW363G060180.1/ORHW375G032492.1/OBRW59G027811.1/OEIW71G032623.1/OGLW97G0032728.1	19
GO:0006014	D-ribose metabolic process	19/190905	21/383722	0.000101478	0.000233273	9.49354e-05	OMEM6G03770.1/OGRW100G08934.1/OGRW100G03078.1/OLAW128G08831.1/OLAW128G02968.1/OMAW171G03156.1/OMAW171G08947.1/OALW18G09140.1/OALW18G03124.1/OMIW190G03169.1/OMIW190G08947.1/OAUW26G03411.1/OOFW323G03655.1/OPUW363G08985.1/OPUW363G03276.1/ORHW375G03345.1/OBRW59G03391.1/OEIW71G03606.1/OGLW97G003670.1	19
GO:0006069	ethanol oxidation	19/190905	21/383722	0.000101478	0.000233273	9.49354e-05	OMEM6G010651.1/OGRW100G015940.1/OGRW100G020860.1/OLAW128G016250.1/OLAW128G020723.1/OMAW171G020804.1/OMAW171G016086.1/OALW18G021183.1/OALW18G016496.1/OMIW190G016176.1/OMIW190G021007.1/OAUW26G011002.1/OOFW323G011446.1/OPUW363G016004.1/OPUW363G020683.1/ORHW375G010536.1/OBRW59G09778.1/OEIW71G010671.1/OGLW97G0010533.1	19
GO:0006071	glycerol metabolic process	19/190905	21/383722	0.000101478	0.000233273	9.49354e-05	OMEM6G011822.1/OGRW100G024896.1/OGRW100G028572.1/OLAW128G029666.1/OLAW128G024590.1/OMAW171G029877.1/OMAW171G024854.1/OALW18G025389.1/OALW18G029220.1/OMIW190G025010.1/OMIW190G030093.1/OAUW26G015287.1/OOFW323G015425.1/OPUW363G024646.1/OPUW363G029527.1/ORHW375G014898.1/OBRW59G013465.1/OEIW71G015222.1/OGLW97G0014890.1	19
GO:0006188	IMP biosynthetic process	19/190905	21/383722	0.000101478	0.000233273	9.49354e-05	OMEM6G014674.1/OGRW100G022826.1/OGRW100G026717.1/OLAW128G027537.1/OLAW128G022679.1/OMAW171G027901.1/OMAW171G022797.1/OALW18G023208.1/OALW18G027291.1/OMIW190G022988.1/OMIW190G027995.1/OAUW26G013021.1/OOFW323G013449.1/OPUW363G022683.1/OPUW363G027569.1/ORHW375G012645.1/OBRW59G011747.1/OEIW71G012761.1/OGLW97G0012574.1	19
GO:0006233	dTDP biosynthetic process	19/190905	21/383722	0.000101478	0.000233273	9.49354e-05	OMEM6G028964.1/OGRW100G053916.1/OGRW100G057390.1/OLAW128G054678.1/OLAW128G057642.1/OMAW171G058385.1/OMAW171G054956.1/OALW18G054253.1/OALW18G057781.1/OMIW190G055334.1/OMIW190G058600.1/OAUW26G030384.1/OOFW323G030107.1/OPUW363G058174.1/OPUW363G054752.1/ORHW375G030247.1/OBRW59G026129.1/OEIW71G030428.1/OGLW97G0030611.1	19
GO:0006285	base-excision repair, AP site formation	19/190905	21/383722	0.000101478	0.000233273	9.49354e-05	OMEM6G038111.1/OGRW100G073696.1/OGRW100G076129.1/OLAW128G076633.1/OLAW128G074055.1/OMAW171G078702.1/OMAW171G075847.1/OALW18G074684.1/OALW18G077243.1/OMIW190G079157.1/OMIW190G076272.1/OAUW26G039591.1/OOFW323G039737.1/OPUW363G075683.1/OPUW363G078447.1/ORHW375G040196.1/OBRW59G034258.1/OEIW71G040227.1/OGLW97G0040637.1	19
GO:0006437	tyrosyl-tRNA aminoacylation	19/190905	21/383722	0.000101478	0.000233273	9.49354e-05	OMEM6G02844.1/OGRW100G07862.1/OGRW100G02046.1/OLAW128G07725.1/OLAW128G01914.1/OMAW171G02102.1/OMAW171G07987.1/OALW18G08062.1/OALW18G02066.1/OMIW190G02090.1/OMIW190G07990.1/OAUW26G02296.1/OOFW323G02616.1/OPUW363G07952.1/OPUW363G02214.1/ORHW375G02282.1/OBRW59G02464.1/OEIW71G02571.1/OGLW97G002536.1	19
GO:0006481	C-terminal protein methylation	19/190905	21/383722	0.000101478	0.000233273	9.49354e-05	OMEM6G018398.1/OGRW100G035669.1/OGRW100G032334.1/OLAW128G033857.1/OLAW128G037242.1/OMAW171G037565.1/OMAW171G033777.1/OALW18G032687.1/OALW18G036312.1/OMIW190G037923.1/OMIW190G033766.1/OAUW26G019407.1/OOFW323G019207.1/OPUW363G037224.1/OPUW363G033465.1/ORHW375G019195.1/OBRW59G017013.1/OEIW71G019434.1/OGLW97G0019103.1	19
GO:0006482	protein demethylation	19/190905	21/383722	0.000101478	0.000233273	9.49354e-05	OMEM6G017116.1/OGRW100G034375.1/OGRW100G031109.1/OLAW128G032518.1/OLAW128G035966.1/OMAW171G036242.1/OMAW171G032497.1/OALW18G031360.1/OALW18G035045.1/OMIW190G036610.1/OMIW190G032894.1/OAUW26G018067.1/OOFW323G017931.1/OPUW363G035926.1/OPUW363G032213.1/ORHW375G017847.1/OBRW59G015878.1/OEIW71G018131.1/OGLW97G0017784.1	19
GO:0006491	N-glycan processing	19/190905	21/383722	0.000101478	0.000233273	9.49354e-05	OMEM6G02078.1/OGRW100G046344.1/OGRW100G01466.1/OLAW128G06993.1/OLAW128G01329.1/OMAW171G01408.1/OMAW171G07312.1/OALW18G049862.1/OALW18G01475.1/OMIW190G01388.1/OMIW190G07287.1/OAUW26G01517.1/OOFW323G01912.1/OPUW363G07248.1/OPUW363G01468.1/ORHW375G01568.1/OBRW59G01804.1/OEIW71G01802.1/OGLW97G001682.1	19
GO:0006493	protein O-linked glycosylation	19/190905	21/383722	0.000101478	0.000233273	9.49354e-05	OMEM6G08581.1/OGRW100G013600.1/OGRW100G018346.1/OLAW128G013701.1/OLAW128G018286.1/OMAW171G018297.1/OMAW171G013602.1/OALW18G018787.1/OALW18G013969.1/OMIW190G013708.1/OMIW190G018475.1/OAUW26G08396.1/OOFW323G09000.1/OPUW363G013854.1/OPUW363G018134.1/ORHW375G07939.1/OBRW59G07623.1/OEIW71G08220.1/OGLW97G008279.1	19
GO:0006534	cysteine metabolic process	19/190905	21/383722	0.000101478	0.000233273	9.49354e-05	OMEM6G040654.1/OGRW100G078130.1/OGRW100G081017.1/OLAW128G081709.1/OLAW128G079330.1/OMAW171G081419.1/OMAW171G083939.1/OALW18G079399.1/OALW18G082409.1/OMIW190G084450.1/OMIW190G081799.1/OAUW26G042054.1/OOFW323G042832.1/OPUW363G081299.1/OPUW363G083879.1/ORHW375G043189.1/OBRW59G036600.1/OEIW71G043220.1/OGLW97G0043756.1	19
GO:0006555	methionine metabolic process	19/190905	21/383722	0.000101478	0.000233273	9.49354e-05	OMEM6G012592.1/OGRW100G025695.1/OGRW100G029331.1/OLAW128G030509.1/OLAW128G025340.1/OMAW171G030618.1/OMAW171G025854.1/OALW18G026212.1/OALW18G030009.1/OMIW190G025798.1/OMIW190G031106.1/OAUW26G016069.1/OOFW323G016239.1/OPUW363G025438.1/OPUW363G030331.1/ORHW375G015744.1/OBRW59G014179.1/OEIW71G016062.1/OGLW97G0015718.1	19
GO:0006570	tyrosine metabolic process	19/190905	21/383722	0.000101478	0.000233273	9.49354e-05	OMEM6G022783.1/OGRW100G043420.1/OGRW100G047786.1/OLAW128G044949.1/OLAW128G048480.1/OMAW171G045223.1/OMAW171G048669.1/OALW18G046919.1/OALW18G043703.1/OMIW190G045568.1/OMIW190G049004.1/OAUW26G023846.1/OOFW323G023641.1/OPUW363G048402.1/OPUW363G044956.1/ORHW375G023714.1/OBRW59G020754.1/OEIW71G023817.1/OGLW97G0023592.1	19
GO:0006808	regulation of nitrogen utilization	19/190905	21/383722	0.000101478	0.000233273	9.49354e-05	OMEM6G019425.1/OGRW100G036795.1/OGRW100G040409.1/OLAW128G041624.1/OLAW128G038256.1/OMAW171G042128.1/OMAW171G038681.1/OALW18G036972.1/OALW18G040547.1/OMIW190G042420.1/OMIW190G039025.1/OAUW26G020489.1/OOFW323G020402.1/OPUW363G038293.1/OPUW363G041734.1/ORHW375G020417.1/OBRW59G017998.1/OEIW71G020567.1/OGLW97G0020004.1	19
GO:0006863	purine nucleobase transport	19/190905	21/383722	0.000101478	0.000233273	9.49354e-05	OMEM6G038376.1/OGRW100G074006.1/OGRW100G076324.1/OLAW128G076931.1/OLAW128G074277.1/OMAW171G078973.1/OMAW171G076044.1/OALW18G074976.1/OALW18G077454.1/OMIW190G079393.1/OMIW190G076443.1/OAUW26G039716.1/OOFW323G039978.1/OPUW363G075925.1/OPUW363G078684.1/ORHW375G040437.1/OBRW59G034549.1/OEIW71G040451.1/OGLW97G0040950.1	19
GO:0007029	endoplasmic reticulum organization	19/190905	21/383722	0.000101478	0.000233273	9.49354e-05	OMEM6G036380.1/OGRW100G072013.1/OGRW100G069713.1/OLAW128G070812.1/OLAW128G072527.1/OMAW171G074119.1/OMAW171G071687.1/OALW18G070684.1/OALW18G072942.1/OMIW190G074466.1/OMIW190G072052.1/OAUW26G038019.1/OOFW323G037900.1/OPUW363G073988.1/OPUW363G071477.1/ORHW375G038283.1/OBRW59G032757.1/OEIW71G038393.1/OGLW97G0038757.1	19
GO:0007093	mitotic cell cycle checkpoint	19/190905	21/383722	0.000101478	0.000233273	9.49354e-05	OMEM6G011709.1/OGRW100G024761.1/OGRW100G028458.1/OLAW128G029518.1/OLAW128G024476.1/OMAW171G029758.1/OMAW171G024718.1/OALW18G025244.1/OALW18G029108.1/OMIW190G024898.1/OMIW190G029965.1/OAUW26G015145.1/OOFW323G015290.1/OPUW363G024535.1/OPUW363G029403.1/ORHW375G014765.1/OBRW59G013357.1/OEIW71G015084.1/OGLW97G0014767.1	19
GO:0007096	regulation of exit from mitosis	19/190905	21/383722	0.000101478	0.000233273	9.49354e-05	OMEM6G020352.1/OGRW100G037578.1/OGRW100G041141.1/OLAW128G042425.1/OLAW128G039012.1/OMAW171G042854.1/OMAW171G039502.1/OALW18G037777.1/OALW18G041299.1/OMIW190G043154.1/OMIW190G039756.1/OAUW26G021257.1/OOFW323G021196.1/OPUW363G039456.1/OPUW363G042547.1/ORHW375G021187.1/OBRW59G018645.1/OEIW71G021348.1/OGLW97G0020842.1	19
GO:0007155	cell adhesion	19/190905	21/383722	0.000101478	0.000233273	9.49354e-05	OMEM6G011909.1/OGRW100G025001.1/OGRW100G028666.1/OLAW128G029793.1/OLAW128G024686.1/OMAW171G029989.1/OMAW171G024968.1/OALW18G025496.1/OALW18G029316.1/OMIW190G025112.1/OMIW190G030220.1/OAUW26G015392.1/OOFW323G015553.1/OPUW363G024753.1/OPUW363G029644.1/ORHW375G015014.1/OBRW59G013559.1/OEIW71G015358.1/OGLW97G0014996.1	19
GO:0008240	tripeptidyl-peptidase activity	19/190905	21/383722	0.000101478	0.000233273	9.49354e-05	OMEM6G09488.1/OGRW100G014778.1/OGRW100G019563.1/OLAW128G014971.1/OLAW128G019527.1/OMAW171G019558.1/OMAW171G014815.1/OALW18G020006.1/OALW18G015183.1/OMIW190G014947.1/OMIW190G019764.1/OAUW26G09718.1/OOFW323G010240.1/OPUW363G014787.1/OPUW363G019396.1/ORHW375G09263.1/OBRW59G08682.1/OEIW71G09435.1/OGLW97G009200.1	19
GO:0008251	tRNA-specific adenosine deaminase activity	19/190905	21/383722	0.000101478	0.000233273	9.49354e-05	OMEM6G024624.1/OGRW100G045007.1/OGRW100G049297.1/OLAW128G046880.1/OLAW128G049902.1/OMAW171G046841.1/OMAW171G050305.1/OALW18G048528.1/OALW18G045222.1/OMIW190G047162.1/OMIW190G050696.1/OAUW26G025527.1/OOFW323G025355.1/OPUW363G050007.1/OPUW363G046578.1/ORHW375G025438.1/OBRW59G022117.1/OEIW71G025465.1/OGLW97G0025417.1	19
GO:0008252	nucleotidase activity	19/190905	21/383722	0.000101478	0.000233273	9.49354e-05	OMEM6G026826.1/OGRW100G051774.1/OGRW100G055456.1/OLAW128G052445.1/OLAW128G055797.1/OMAW171G056261.1/OMAW171G052868.1/OALW18G052183.1/OALW18G055801.1/OMIW190G053250.1/OMIW190G056529.1/OAUW26G028122.1/OOFW323G028040.1/OPUW363G056009.1/OPUW363G052700.1/ORHW375G028121.1/OBRW59G024316.1/OEIW71G028229.1/OGLW97G0028246.1	19
GO:0008353	RNA polymerase II carboxy-terminal domain kinase activity	19/190905	21/383722	0.000101478	0.000233273	9.49354e-05	OMEM6G021119.1/OGRW100G038533.1/OGRW100G041901.1/OLAW128G043245.1/OLAW128G039687.1/OMAW171G043621.1/OMAW171G040212.1/OALW18G038628.1/OALW18G042083.1/OMIW190G043967.1/OMIW190G040492.1/OAUW26G022089.1/OOFW323G021944.1/OPUW363G039825.1/OPUW363G043301.1/ORHW375G021974.1/OBRW59G019335.1/OEIW71G022124.1/OGLW97G0021741.1	19
GO:0008422	beta-glucosidase activity	19/190905	21/383722	0.000101478	0.000233273	9.49354e-05	OMEM6G05628.1/OGRW100G010824.1/OGRW100G04827.1/OLAW128G010786.1/OLAW128G04752.1/OMAW171G05034.1/OMAW171G010914.1/OALW18G011042.1/OALW18G04917.1/OMIW190G05029.1/OMIW190G011035.1/OAUW26G05369.1/OOFW323G05509.1/OPUW363G010821.1/OPUW363G05140.1/ORHW375G05236.1/OBRW59G04984.1/OEIW71G05460.1/OGLW97G005532.1	19
GO:0008446	GDP-mannose 4,6-dehydratase activity	19/190905	21/383722	0.000101478	0.000233273	9.49354e-05	OMEM6G023039.1/OGRW100G043673.1/OGRW100G048049.1/OLAW128G045211.1/OLAW128G048729.1/OMAW171G045489.1/OMAW171G048940.1/OALW18G047167.1/OALW18G043969.1/OMIW190G045807.1/OMIW190G049288.1/OAUW26G024097.1/OOFW323G023928.1/OPUW363G048656.1/OPUW363G045233.1/ORHW375G023994.1/OBRW59G020988.1/OEIW71G024079.1/OGLW97G0023866.1	19
GO:0008455	alpha-1,6-mannosylglycoprotein 2-beta-N-acetylglucosaminyltransFtrase activity	19/190905	21/383722	0.000101478	0.000233273	9.49354e-05	OMEM6G010537.1/OGRW100G015809.1/OGRW100G020712.1/OLAW128G016124.1/OLAW128G020588.1/OMAW171G020675.1/OMAW171G015961.1/OALW18G021056.1/OALW18G016356.1/OMIW190G016044.1/OMIW190G020883.1/OAUW26G010876.1/OOFW323G011311.1/OPUW363G015876.1/OPUW363G020557.1/ORHW375G010399.1/OBRW59G09669.1/OEIW71G010555.1/OGLW97G0010396.1	19
GO:0008478	pyridoxal kinase activity	19/190905	21/383722	0.000101478	0.000233273	9.49354e-05	OMEM6G041701.1/OGRW100G079560.1/OGRW100G081718.1/OLAW128G082824.1/OLAW128G080314.1/OMAW171G082509.1/OMAW171G084940.1/OALW18G080899.1/OALW18G083186.1/OMIW190G085546.1/OMIW190G083059.1/OAUW26G043160.1/OOFW323G043862.1/OPUW363G082432.1/OPUW363G084975.1/ORHW375G044273.1/OBRW59G037445.1/OEIW71G044374.1/OGLW97G0045040.1	19
GO:0008568	microtubule-severing ATPase activity	19/190905	21/383722	0.000101478	0.000233273	9.49354e-05	OMEM6G03908.1/OGRW100G09073.1/OGRW100G03191.1/OLAW128G08959.1/OLAW128G03081.1/OMAW171G03290.1/OMAW171G08822.1/OALW18G09266.1/OALW18G03240.1/OMIW190G03290.1/OMIW190G08819.1/OAUW26G03530.1/OOFW323G03780.1/OPUW363G09131.1/OPUW363G03402.1/ORHW375G03472.1/OBRW59G03521.1/OEIW71G03739.1/OGLW97G003802.1	19
GO:0008690	3-deoxy-manno-octulosonate cytidylyltransFtrase activity	19/190905	21/383722	0.000101478	0.000233273	9.49354e-05	OMEM6G022429.1/OGRW100G039829.1/OGRW100G043107.1/OLAW128G044577.1/OLAW128G040902.1/OMAW171G044892.1/OMAW171G041510.1/OALW18G039963.1/OALW18G043370.1/OMIW190G045244.1/OMIW190G041805.1/OAUW26G023515.1/OOFW323G023250.1/OPUW363G041113.1/OPUW363G044596.1/ORHW375G023320.1/OBRW59G020429.1/OEIW71G023430.1/OGLW97G0023207.1	19
GO:0008837	diaminopimelate epimerase activity	19/190905	21/383722	0.000101478	0.000233273	9.49354e-05	OMEM6G041516.1/OGRW100G079354.1/OGRW100G081456.1/OLAW128G082597.1/OLAW128G080087.1/OMAW171G082286.1/OMAW171G084723.1/OALW18G080697.1/OALW18G082909.1/OMIW190G085337.1/OMIW190G082833.1/OAUW26G042923.1/OOFW323G043627.1/OPUW363G082221.1/OPUW363G084744.1/ORHW375G044056.1/OBRW59G037280.1/OEIW71G044154.1/OGLW97G0044806.1	19
GO:0008915	lipid-A-disaccharide synthase activity	19/190905	21/383722	0.000101478	0.000233273	9.49354e-05	OMEM6G04425.1/OGRW100G09630.1/OGRW100G03713.1/OLAW128G09555.1/OLAW128G03610.1/OMAW171G03827.1/OMAW171G09724.1/OALW18G09824.1/OALW18G03782.1/OMIW190G03818.1/OMIW190G09816.1/OAUW26G04146.1/OOFW323G04353.1/OPUW363G09673.1/OPUW363G03975.1/ORHW375G04042.1/OBRW59G03991.1/OEIW71G04311.1/OGLW97G004371.1	19
GO:0008942	nitrite reductase [NAD(P)H] activity	19/190905	21/383722	0.000101478	0.000233273	9.49354e-05	OMEM6G08549.1/OGRW100G073571.1/OGRW100G075873.1/OLAW128G076517.1/OLAW128G073803.1/OMAW171G078553.1/OMAW171G075726.1/OALW18G074562.1/OALW18G076989.1/OMIW190G079009.1/OMIW190G076131.1/OAUW26G039467.1/OOFW323G039575.1/OPUW363G075522.1/OPUW363G078317.1/ORHW375G040071.1/OBRW59G034145.1/OEIW71G040076.1/OGLW97G0040397.1	19
GO:0008972	phosphomethylpyrimidine kinase activity	19/190905	21/383722	0.000101478	0.000233273	9.49354e-05	OMEM6G040321.1/OGRW100G078466.1/OGRW100G080458.1/OLAW128G081318.1/OLAW128G078992.1/OMAW171G081035.1/OMAW171G083540.1/OALW18G079761.1/OALW18G081830.1/OMIW190G084042.1/OMIW190G081408.1/OAUW26G041589.1/OOFW323G042401.1/OPUW363G080870.1/OPUW363G083482.1/ORHW375G042797.1/OBRW59G036263.1/OEIW71G042814.1/OGLW97G0043256.1	19
GO:0009013	succinate-semialdehyde dehydrogenase [NAD(P)+] activity	19/190905	21/383722	0.000101478	0.000233273	9.49354e-05	OMEM6G06967.1/OGRW100G012199.1/OGRW100G016701.1/OLAW128G012316.1/OLAW128G017011.1/OMAW171G016888.1/OMAW171G012258.1/OALW18G017450.1/OALW18G012630.1/OMIW190G012288.1/OMIW190G017153.1/OAUW26G06814.1/OOFW323G07638.1/OPUW363G012157.1/OPUW363G016814.1/ORHW375G06602.1/OBRW59G06393.1/OEIW71G06777.1/OGLW97G006864.1	19
GO:0009045	xylose isomerase activity	19/190905	21/383722	0.000101478	0.000233273	9.49354e-05	OMEM6G029183.1/OGRW100G054126.1/OGRW100G057560.1/OLAW128G054888.1/OLAW128G057829.1/OMAW171G058583.1/OMAW171G055193.1/OALW18G054469.1/OALW18G057968.1/OMIW190G055534.1/OMIW190G058818.1/OAUW26G030564.1/OOFW323G030434.1/OPUW363G058370.1/OPUW363G054976.1/ORHW375G030497.1/OBRW59G026298.1/OEIW71G030634.1/OGLW97G0030771.1	19
GO:0009152	purine ribonucleotide biosynthetic process	19/190905	21/383722	0.000101478	0.000233273	9.49354e-05	OMEM6G014674.1/OGRW100G022826.1/OGRW100G026717.1/OLAW128G027537.1/OLAW128G022679.1/OMAW171G027901.1/OMAW171G022797.1/OALW18G023208.1/OALW18G027291.1/OMIW190G022988.1/OMIW190G027995.1/OAUW26G013021.1/OOFW323G013449.1/OPUW363G022683.1/OPUW363G027569.1/ORHW375G012645.1/OBRW59G011747.1/OEIW71G012761.1/OGLW97G0012574.1	19
GO:0009264	deoxyribonucleotide catabolic process	19/190905	21/383722	0.000101478	0.000233273	9.49354e-05	OMEM6G023457.1/OGRW100G044115.1/OGRW100G048470.1/OLAW128G045653.1/OLAW128G049129.1/OMAW171G045911.1/OMAW171G049389.1/OALW18G047624.1/OALW18G044406.1/OMIW190G046231.1/OMIW190G049742.1/OAUW26G024527.1/OOFW323G024386.1/OPUW363G049057.1/OPUW363G045664.1/ORHW375G024458.1/OBRW59G021376.1/OEIW71G024507.1/OGLW97G0024377.1	19
GO:0009311	oligosaccharide metabolic process	19/190905	21/383722	0.000101478	0.000233273	9.49354e-05	OMEM6G05832.1/OGRW100G011039.1/OGRW100G05027.1/OLAW128G010991.1/OLAW128G04948.1/OMAW171G05242.1/OMAW171G011110.1/OALW18G011245.1/OALW18G05129.1/OMIW190G05256.1/OMIW190G011230.1/OAUW26G05597.1/OOFW323G05738.1/OPUW363G011027.1/OPUW363G05347.1/ORHW375G05449.1/OBRW59G05179.1/OEIW71G05674.1/OGLW97G005728.1	19
GO:0009312	oligosaccharide biosynthetic process	19/190905	21/383722	0.000101478	0.000233273	9.49354e-05	OMEM6G010537.1/OGRW100G015809.1/OGRW100G020712.1/OLAW128G016124.1/OLAW128G020588.1/OMAW171G020675.1/OMAW171G015961.1/OALW18G021056.1/OALW18G016356.1/OMIW190G016044.1/OMIW190G020883.1/OAUW26G010876.1/OOFW323G011311.1/OPUW363G015876.1/OPUW363G020557.1/ORHW375G010399.1/OBRW59G09669.1/OEIW71G010555.1/OGLW97G0010396.1	19
GO:0009341	beta-galactosidase complex	19/190905	21/383722	0.000101478	0.000233273	9.49354e-05	OMEM6G06051.1/OGRW100G011272.1/OGRW100G05254.1/OLAW128G011244.1/OLAW128G05178.1/OMAW171G05483.1/OMAW171G011337.1/OALW18G011495.1/OALW18G05368.1/OMIW190G05498.1/OMIW190G011471.1/OAUW26G05860.1/OOFW323G05976.1/OPUW363G011410.1/OPUW363G05586.1/ORHW375G05698.1/OBRW59G05436.1/OEIW71G05911.1/OGLW97G005943.1	19
GO:0009411	response to UV	19/190905	21/383722	0.000101478	0.000233273	9.49354e-05	OMEM6G07776.1/OGRW100G013117.1/OGRW100G017530.1/OLAW128G013202.1/OLAW128G017811.1/OMAW171G017789.1/OMAW171G013147.1/OALW18G018281.1/OALW18G013448.1/OMIW190G013187.1/OMIW190G018036.1/OAUW26G07739.1/OOFW323G08551.1/OPUW363G013036.1/OPUW363G017692.1/ORHW375G07494.1/OBRW59G07156.1/OEIW71G07748.1/OGLW97G007794.1	19
GO:0009443	pyridoxal 5'-phosphate salvage	19/190905	21/383722	0.000101478	0.000233273	9.49354e-05	OMEM6G041701.1/OGRW100G079560.1/OGRW100G081718.1/OLAW128G082824.1/OLAW128G080314.1/OMAW171G082509.1/OMAW171G084940.1/OALW18G080899.1/OALW18G083186.1/OMIW190G085546.1/OMIW190G083059.1/OAUW26G043160.1/OOFW323G043862.1/OPUW363G082432.1/OPUW363G084975.1/ORHW375G044273.1/OBRW59G037445.1/OEIW71G044374.1/OGLW97G0045040.1	19
GO:0009450	gamma-aminobutyric acid catabolic process	19/190905	21/383722	0.000101478	0.000233273	9.49354e-05	OMEM6G06967.1/OGRW100G012199.1/OGRW100G016701.1/OLAW128G012316.1/OLAW128G017011.1/OMAW171G016888.1/OMAW171G012258.1/OALW18G017450.1/OALW18G012630.1/OMIW190G012288.1/OMIW190G017153.1/OAUW26G06814.1/OOFW323G07638.1/OPUW363G012157.1/OPUW363G016814.1/ORHW375G06602.1/OBRW59G06393.1/OEIW71G06777.1/OGLW97G006864.1	19
GO:0009512	cytochrome b6f complex	19/190905	21/383722	0.000101478	0.000233273	9.49354e-05	OMEM6G012187.1/OGRW100G025291.1/OGRW100G028928.1/OLAW128G030104.1/OLAW128G024944.1/OMAW171G030270.1/OMAW171G025262.1/OALW18G025782.1/OALW18G029590.1/OMIW190G025383.1/OMIW190G030516.1/OAUW26G015658.1/OOFW323G015826.1/OPUW363G025032.1/OPUW363G029931.1/ORHW375G015317.1/OBRW59G013816.1/OEIW71G015651.1/OGLW97G0015293.1	19
GO:0009651	response to salt stress	19/190905	21/383722	0.000101478	0.000233273	9.49354e-05	OMEM6G011639.1/OGRW100G024699.1/OGRW100G028398.1/OLAW128G029438.1/OLAW128G024410.1/OMAW171G029706.1/OMAW171G024646.1/OALW18G025171.1/OALW18G029036.1/OMIW190G024848.1/OMIW190G029889.1/OAUW26G015072.1/OOFW323G015213.1/OPUW363G024482.1/OPUW363G029334.1/ORHW375G014697.1/OBRW59G013306.1/OEIW71G015027.1/OGLW97G0014709.1	19
GO:0009694	jasmonic acid metabolic process	19/190905	21/383722	0.000101478	0.000233273	9.49354e-05	OMEM6G022672.1/OGRW100G040061.1/OGRW100G043319.1/OLAW128G044825.1/OLAW128G041121.1/OMAW171G045111.1/OMAW171G041745.1/OALW18G040212.1/OALW18G043586.1/OMIW190G045461.1/OMIW190G042049.1/OAUW26G023730.1/OOFW323G023492.1/OPUW363G041349.1/OPUW363G044832.1/ORHW375G023570.1/OBRW59G020632.1/OEIW71G023677.1/OGLW97G0023478.1	19
GO:0009864	induced systemic resistance, jasmonic acid mediated signaling pathway	19/190905	21/383722	0.000101478	0.000233273	9.49354e-05	OMEM6G022672.1/OGRW100G040061.1/OGRW100G043319.1/OLAW128G044825.1/OLAW128G041121.1/OMAW171G045111.1/OMAW171G041745.1/OALW18G040212.1/OALW18G043586.1/OMIW190G045461.1/OMIW190G042049.1/OAUW26G023730.1/OOFW323G023492.1/OPUW363G041349.1/OPUW363G044832.1/ORHW375G023570.1/OBRW59G020632.1/OEIW71G023677.1/OGLW97G0023478.1	19
GO:0009902	chloroplast relocation	19/190905	21/383722	0.000101478	0.000233273	9.49354e-05	OMEM6G034562.1/OGRW100G065648.1/OGRW100G067933.1/OLAW128G068170.1/OLAW128G065625.1/OMAW171G067144.1/OMAW171G069518.1/OALW18G068639.1/OALW18G065999.1/OMIW190G069984.1/OMIW190G067280.1/OAUW26G035869.1/OOFW323G035749.1/OPUW363G069407.1/OPUW363G066790.1/ORHW375G036071.1/OBRW59G030955.1/OEIW71G036413.1/OGLW97G0036595.1	19
GO:0009910	negative regulation of flower development	19/190905	21/383722	0.000101478	0.000233273	9.49354e-05	OMEM6G01820.1/OGRW100G046701.1/OGRW100G01118.1/OLAW128G06617.1/OLAW128G0997.1/OMAW171G01033.1/OMAW171G06953.1/OALW18G050219.1/OALW18G01105.1/OMIW190G01009.1/OMIW190G06922.1/OAUW26G01109.1/OOFW323G01551.1/OPUW363G06874.1/OPUW363G01090.1/ORHW375G01181.1/OBRW59G01474.1/OEIW71G01407.1/OGLW97G001282.1	19
GO:0009976	tocopherol cyclase activity	19/190905	21/383722	0.000101478	0.000233273	9.49354e-05	OMEM6G07692.1/OGRW100G013022.1/OGRW100G017444.1/OLAW128G013105.1/OLAW128G017720.1/OMAW171G017673.1/OMAW171G013054.1/OALW18G018179.1/OALW18G013351.1/OMIW190G013071.1/OMIW190G017931.1/OAUW26G07632.1/OOFW323G08467.1/OPUW363G012921.1/OPUW363G017605.1/ORHW375G07398.1/OBRW59G07068.1/OEIW71G07621.1/OGLW97G007692.1	19
GO:0010024	phytochromobilin biosynthetic process	19/190905	21/383722	0.000101478	0.000233273	9.49354e-05	OMEM6G06024.1/OGRW100G011247.1/OGRW100G05222.1/OLAW128G011213.1/OLAW128G05151.1/OMAW171G05457.1/OMAW171G011311.1/OALW18G011465.1/OALW18G05344.1/OMIW190G05468.1/OMIW190G011446.1/OAUW26G05827.1/OOFW323G05943.1/OPUW363G011432.1/OPUW363G05562.1/ORHW375G05669.1/OBRW59G05407.1/OEIW71G05886.1/OGLW97G005921.1	19
GO:0010264	myo-inositol hexakisphosphate biosynthetic process	19/190905	21/383722	0.000101478	0.000233273	9.49354e-05	OMEM6G011955.1/OGRW100G025052.1/OGRW100G028716.1/OLAW128G029840.1/OLAW128G024737.1/OMAW171G030050.1/OMAW171G025020.1/OALW18G025544.1/OALW18G029368.1/OMIW190G025167.1/OMIW190G030271.1/OAUW26G015447.1/OOFW323G015601.1/OPUW363G024819.1/OPUW363G029692.1/ORHW375G015070.1/OBRW59G013611.1/OEIW71G015408.1/OGLW97G0015050.1	19
GO:0010338	leaf formation	19/190905	21/383722	0.000101478	0.000233273	9.49354e-05	OMEM6G041546.1/OGRW100G079395.1/OGRW100G081422.1/OLAW128G082637.1/OLAW128G080049.1/OMAW171G082323.1/OMAW171G084764.1/OALW18G080734.1/OALW18G082872.1/OMIW190G085369.1/OMIW190G082869.1/OAUW26G042878.1/OOFW323G043665.1/OPUW363G082262.1/OPUW363G084788.1/ORHW375G044093.1/OBRW59G037306.1/OEIW71G044199.1/OGLW97G0044840.1	19
GO:0010349	L-galactose dehydrogenase activity	19/190905	21/383722	0.000101478	0.000233273	9.49354e-05	OMEM6G041127.1/OGRW100G078963.1/OGRW100G081137.1/OLAW128G082172.1/OLAW128G079753.1/OMAW171G081802.1/OMAW171G084293.1/OALW18G080308.1/OALW18G082566.1/OMIW190G084677.1/OMIW190G082220.1/OAUW26G042489.1/OOFW323G043200.1/OPUW363G081749.1/OPUW363G084289.1/ORHW375G043608.1/OBRW59G036977.1/OEIW71G043699.1/OGLW97G0044295.1	19
GO:0010387	COP9 signalosome assembly	19/190905	21/383722	0.000101478	0.000233273	9.49354e-05	OMEM6G017001.1/OGRW100G034264.1/OGRW100G031003.1/OLAW128G032404.1/OLAW128G035849.1/OMAW171G036126.1/OMAW171G032383.1/OALW18G031242.1/OALW18G034936.1/OMIW190G036492.1/OMIW190G032777.1/OAUW26G017952.1/OOFW323G017821.1/OPUW363G035813.1/OPUW363G032099.1/ORHW375G017734.1/OBRW59G015757.1/OEIW71G018017.1/OGLW97G0017657.1	19
GO:0010452	histone H3-K36 methylation	19/190905	21/383722	0.000101478	0.000233273	9.49354e-05	OMEM6G08964.1/OGRW100G013982.1/OGRW100G018770.1/OLAW128G014112.1/OLAW128G018727.1/OMAW171G018734.1/OMAW171G013998.1/OALW18G019192.1/OALW18G014367.1/OMIW190G014111.1/OMIW190G018898.1/OAUW26G08835.1/OOFW323G09412.1/OPUW363G013452.1/OPUW363G018566.1/ORHW375G08372.1/OBRW59G07986.1/OEIW71G08602.1/OGLW97G008592.1	19
GO:0010506	regulation of autophagy	19/190905	21/383722	0.000101478	0.000233273	9.49354e-05	OMEM6G035759.1/OGRW100G071256.1/OGRW100G069029.1/OLAW128G069582.1/OLAW128G071874.1/OMAW171G073441.1/OMAW171G070928.1/OALW18G069913.1/OALW18G072247.1/OMIW190G073772.1/OMIW190G071328.1/OAUW26G037199.1/OOFW323G037163.1/OPUW363G073263.1/OPUW363G070728.1/ORHW375G037503.1/OBRW59G032137.1/OEIW71G037623.1/OGLW97G0038032.1	19
GO:0016197	endosomal transport	19/190905	21/383722	0.000101478	0.000233273	9.49354e-05	OMEM6G010785.1/OGRW100G016058.1/OGRW100G021005.1/OLAW128G016398.1/OLAW128G020847.1/OMAW171G020943.1/OMAW171G016229.1/OALW18G021311.1/OALW18G016653.1/OMIW190G016321.1/OMIW190G021156.1/OAUW26G011129.1/OOFW323G011584.1/OPUW363G016145.1/OPUW363G020824.1/ORHW375G010691.1/OBRW59G09918.1/OEIW71G010797.1/OGLW97G0010674.1	19
GO:0016251	obsolete general RNA polymerase II transcription factor activity	19/190905	21/383722	0.000101478	0.000233273	9.49354e-05	OMEM6G02693.1/OGRW100G07944.1/OGRW100G02144.1/OLAW128G07802.1/OLAW128G02028.1/OMAW171G02186.1/OMAW171G08048.1/OALW18G08142.1/OALW18G02162.1/OMIW190G02163.1/OMIW190G08025.1/OAUW26G02411.1/OOFW323G02673.1/OPUW363G08022.1/OPUW363G02286.1/ORHW375G02379.1/OBRW59G02522.1/OEIW71G02648.1/OGLW97G002622.1	19
GO:0016410	N-acyltransFtrase activity	19/190905	21/383722	0.000101478	0.000233273	9.49354e-05	OMEM6G026324.1/OGRW100G051267.1/OGRW100G055009.1/OLAW128G051914.1/OLAW128G055360.1/OMAW171G055743.1/OMAW171G052364.1/OALW18G051684.1/OALW18G055360.1/OMIW190G052729.1/OMIW190G056054.1/OAUW26G027675.1/OOFW323G027526.1/OPUW363G055505.1/OPUW363G052193.1/ORHW375G027578.1/OBRW59G023937.1/OEIW71G027691.1/OGLW97G0027722.1	19
GO:0016429	tRNA (adenine-N1-)-methyltransFtrase activity	19/190905	21/383722	0.000101478	0.000233273	9.49354e-05	OMEM6G016493.1/OGRW100G033711.1/OGRW100G030488.1/OLAW128G031793.1/OLAW128G035345.1/OMAW171G035500.1/OMAW171G031831.1/OALW18G030635.1/OALW18G034388.1/OMIW190G035906.1/OMIW190G032174.1/OAUW26G017336.1/OOFW323G017200.1/OPUW363G035247.1/OPUW363G031524.1/ORHW375G017121.1/OBRW59G015293.1/OEIW71G017370.1/OGLW97G0017116.1	19
GO:0016435	rRNA (guanine) methyltransFtrase activity	19/190905	21/383722	0.000101478	0.000233273	9.49354e-05	OMEM6G010572.1/OGRW100G015857.1/OGRW100G020758.1/OLAW128G016168.1/OLAW128G020637.1/OMAW171G020722.1/OMAW171G016009.1/OALW18G021101.1/OALW18G016399.1/OMIW190G016092.1/OMIW190G020928.1/OAUW26G010914.1/OOFW323G011359.1/OPUW363G015924.1/OPUW363G020597.1/ORHW375G010453.1/OBRW59G09696.1/OEIW71G010591.1/OGLW97G0010443.1	19
GO:0016504	peptidase activator activity	19/190905	21/383722	0.000101478	0.000233273	9.49354e-05	OMEM6G024186.1/OGRW100G044701.1/OGRW100G049106.1/OLAW128G046410.1/OLAW128G049775.1/OMAW171G046623.1/OMAW171G050079.1/OALW18G048339.1/OALW18G045028.1/OMIW190G046945.1/OMIW190G050462.1/OAUW26G025300.1/OOFW323G025121.1/OPUW363G049812.1/OPUW363G046350.1/ORHW375G025191.1/OBRW59G021966.1/OEIW71G025236.1/OGLW97G0025170.1	19
GO:0016636	oxidoreductase activity, acting on the CH-CH group of donors, iron-sulfur protein as acceptor	19/190905	21/383722	0.000101478	0.000233273	9.49354e-05	OMEM6G06024.1/OGRW100G011247.1/OGRW100G05222.1/OLAW128G011213.1/OLAW128G05151.1/OMAW171G05457.1/OMAW171G011311.1/OALW18G011465.1/OALW18G05344.1/OMIW190G05468.1/OMIW190G011446.1/OAUW26G05827.1/OOFW323G05943.1/OPUW363G011432.1/OPUW363G05562.1/ORHW375G05669.1/OBRW59G05407.1/OEIW71G05886.1/OGLW97G005921.1	19
GO:0016719	carotene 7,8-desaturase activity	19/190905	21/383722	0.000101478	0.000233273	9.49354e-05	OMEM6G026832.1/OGRW100G051775.1/OGRW100G055459.1/OLAW128G052446.1/OLAW128G055798.1/OMAW171G056262.1/OMAW171G052869.1/OALW18G052184.1/OALW18G055803.1/OMIW190G053251.1/OMIW190G056532.1/OAUW26G028121.1/OOFW323G028041.1/OPUW363G056010.1/OPUW363G052702.1/ORHW375G028123.1/OBRW59G024317.1/OEIW71G028232.1/OGLW97G0028247.1	19
GO:0016925	protein sumoylation	19/190905	21/383722	0.000101478	0.000233273	9.49354e-05	OMEM6G028590.1/OGRW100G053520.1/OGRW100G057006.1/OLAW128G054259.1/OLAW128G057263.1/OMAW171G057995.1/OMAW171G054518.1/OALW18G053865.1/OALW18G057387.1/OMIW190G054910.1/OMIW190G058153.1/OAUW26G029973.1/OOFW323G029679.1/OPUW363G057742.1/OPUW363G054333.1/ORHW375G029822.1/OBRW59G025749.1/OEIW71G030010.1/OGLW97G0030178.1	19
GO:0017009	protein-phycocyanobilin linkage	19/190905	21/383722	0.000101478	0.000233273	9.49354e-05	OMEM6G038734.1/OGRW100G074377.1/OGRW100G076684.1/OLAW128G077342.1/OLAW128G074671.1/OMAW171G079365.1/OMAW171G076459.1/OALW18G075396.1/OALW18G077901.1/OMIW190G079816.1/OMIW190G076921.1/OAUW26G040162.1/OOFW323G040404.1/OPUW363G076324.1/OPUW363G079120.1/ORHW375G040867.1/OBRW59G034920.1/OEIW71G040883.1/OGLW97G0041431.1	19
GO:0017116	single-stranded DNA-dependent ATP-dependent DNA helicase activity	19/190905	21/383722	0.000101478	0.000233273	9.49354e-05	OMEM6G018293.1/OGRW100G035564.1/OGRW100G032236.1/OLAW128G033753.1/OLAW128G037135.1/OMAW171G037432.1/OMAW171G033676.1/OALW18G032578.1/OALW18G036209.1/OMIW190G037795.1/OMIW190G033871.1/OAUW26G019289.1/OOFW323G019106.1/OPUW363G037103.1/OPUW363G033352.1/ORHW375G019076.1/OBRW59G016909.1/OEIW71G019325.1/OGLW97G0018987.1	19
GO:0018142	protein-DNA covalent cross-linking	19/190905	21/383722	0.000101478	0.000233273	9.49354e-05	OMEM6G024752.1/OGRW100G045195.1/OGRW100G049383.1/OLAW128G046763.1/OLAW128G050044.1/OMAW171G046974.1/OMAW171G050402.1/OALW18G048678.1/OALW18G045309.1/OMIW190G047280.1/OMIW190G050790.1/OAUW26G025752.1/OOFW323G025475.1/OPUW363G050238.1/OPUW363G046679.1/ORHW375G025558.1/OBRW59G022235.1/OEIW71G025578.1/OGLW97G0025533.1	19
GO:0018160	peptidyl-pyrromethane cofactor linkage	19/190905	21/383722	0.000101478	0.000233273	9.49354e-05	OMEM6G06930.1/OGRW100G012161.1/OGRW100G016672.1/OLAW128G012272.1/OLAW128G016977.1/OMAW171G016842.1/OMAW171G012218.1/OALW18G017483.1/OALW18G012595.1/OMIW190G012239.1/OMIW190G017106.1/OAUW26G06776.1/OOFW323G07580.1/OPUW363G012117.1/OPUW363G016776.1/ORHW375G06562.1/OBRW59G06364.1/OEIW71G06737.1/OGLW97G006821.1	19
GO:0018343	protein farnesylation	19/190905	21/383722	0.000101478	0.000233273	9.49354e-05	OMEM6G04304.1/OGRW100G09510.1/OGRW100G03586.1/OLAW128G09422.1/OLAW128G03484.1/OMAW171G03694.1/OMAW171G09594.1/OALW18G09698.1/OALW18G03656.1/OMIW190G03691.1/OMIW190G09685.1/OAUW26G04010.1/OOFW323G04232.1/OPUW363G09540.1/OPUW363G03857.1/ORHW375G03914.1/OBRW59G03883.1/OEIW71G04201.1/OGLW97G004252.1	19
GO:0019140	inositol 3-kinase activity	19/190905	21/383722	0.000101478	0.000233273	9.49354e-05	OMEM6G011955.1/OGRW100G025052.1/OGRW100G028716.1/OLAW128G029840.1/OLAW128G024737.1/OMAW171G030050.1/OMAW171G025020.1/OALW18G025544.1/OALW18G029368.1/OMIW190G025167.1/OMIW190G030271.1/OAUW26G015447.1/OOFW323G015601.1/OPUW363G024819.1/OPUW363G029692.1/ORHW375G015070.1/OBRW59G013611.1/OEIW71G015408.1/OGLW97G0015050.1	19
GO:0019156	isoamylase activity	19/190905	21/383722	0.000101478	0.000233273	9.49354e-05	OMEM6G021129.1/OGRW100G038544.1/OGRW100G041912.1/OLAW128G043253.1/OLAW128G039695.1/OMAW171G043627.1/OMAW171G040220.1/OALW18G038641.1/OALW18G042090.1/OMIW190G043973.1/OMIW190G040500.1/OAUW26G022096.1/OOFW323G021953.1/OPUW363G039832.1/OPUW363G043310.1/ORHW375G021983.1/OBRW59G019344.1/OEIW71G022133.1/OGLW97G0021750.1	19
GO:0019211	phosphatase activator activity	19/190905	21/383722	0.000101478	0.000233273	9.49354e-05	OMEM6G023675.1/OGRW100G044301.1/OGRW100G048661.1/OLAW128G045888.1/OLAW128G049312.1/OMAW171G046093.1/OMAW171G049572.1/OALW18G047831.1/OALW18G044598.1/OMIW190G046426.1/OMIW190G049939.1/OAUW26G024756.1/OOFW323G024599.1/OPUW363G049241.1/OPUW363G045854.1/ORHW375G024657.1/OBRW59G021548.1/OEIW71G024715.1/OGLW97G0024579.1	19
GO:0019237	centromeric DNA binding	19/190905	21/383722	0.000101478	0.000233273	9.49354e-05	OMEM6G03452.1/OGRW100G08620.1/OGRW100G02770.1/OLAW128G08513.1/OLAW128G02653.1/OMAW171G02827.1/OMAW171G09251.1/OALW18G08844.1/OALW18G02777.1/OMIW190G02833.1/OMIW190G09314.1/OAUW26G03070.1/OOFW323G03344.1/OPUW363G08658.1/OPUW363G02935.1/ORHW375G03023.1/OBRW59G03100.1/OEIW71G03296.1/OGLW97G003292.1	19
GO:0019252	starch biosynthetic process	19/190905	21/383722	0.000101478	0.000233273	9.49354e-05	OMEM6G021129.1/OGRW100G038544.1/OGRW100G041912.1/OLAW128G043253.1/OLAW128G039695.1/OMAW171G043627.1/OMAW171G040220.1/OALW18G038641.1/OALW18G042090.1/OMIW190G043973.1/OMIW190G040500.1/OAUW26G022096.1/OOFW323G021953.1/OPUW363G039832.1/OPUW363G043310.1/ORHW375G021983.1/OBRW59G019344.1/OEIW71G022133.1/OGLW97G0021750.1	19
GO:0019287	isopentenyl diphosphate biosynthetic process, mevalonate pathway	19/190905	21/383722	0.000101478	0.000233273	9.49354e-05	OMEM6G06420.1/OGRW100G011652.1/OGRW100G016178.1/OLAW128G011731.1/OLAW128G016519.1/OMAW171G016355.1/OMAW171G011676.1/OALW18G016854.1/OALW18G012095.1/OMIW190G011746.1/OMIW190G016551.1/OAUW26G06305.1/OOFW323G07031.1/OPUW363G011599.1/OPUW363G016264.1/ORHW375G06018.1/OBRW59G05933.1/OEIW71G06207.1/OGLW97G006302.1	19
GO:0019419	sulfate reduction	19/190905	21/383722	0.000101478	0.000233273	9.49354e-05	OMEM6G027986.1/OGRW100G052974.1/OGRW100G056477.1/OLAW128G053668.1/OLAW128G056717.1/OMAW171G057348.1/OMAW171G053896.1/OALW18G053301.1/OALW18G056824.1/OMIW190G054294.1/OMIW190G057569.1/OAUW26G029303.1/OOFW323G029081.1/OPUW363G057121.1/OPUW363G053763.1/ORHW375G029243.1/OBRW59G025244.1/OEIW71G029407.1/OGLW97G0029580.1	19
GO:0019673	GDP-mannose metabolic process	19/190905	21/383722	0.000101478	0.000233273	9.49354e-05	OMEM6G023039.1/OGRW100G043673.1/OGRW100G048049.1/OLAW128G045211.1/OLAW128G048729.1/OMAW171G045489.1/OMAW171G048940.1/OALW18G047167.1/OALW18G043969.1/OMIW190G045807.1/OMIW190G049288.1/OAUW26G024097.1/OOFW323G023928.1/OPUW363G048656.1/OPUW363G045233.1/ORHW375G023994.1/OBRW59G020988.1/OEIW71G024079.1/OGLW97G0023866.1	19
GO:0019948	SUMO activating enzyme activity	19/190905	21/383722	0.000101478	0.000233273	9.49354e-05	OMEM6G028590.1/OGRW100G053520.1/OGRW100G057006.1/OLAW128G054259.1/OLAW128G057263.1/OMAW171G057995.1/OMAW171G054518.1/OALW18G053865.1/OALW18G057387.1/OMIW190G054910.1/OMIW190G058153.1/OAUW26G029973.1/OOFW323G029679.1/OPUW363G057742.1/OPUW363G054333.1/ORHW375G029822.1/OBRW59G025749.1/OEIW71G030010.1/OGLW97G0030178.1	19
GO:0030124	AP-4 adaptor complex	19/190905	21/383722	0.000101478	0.000233273	9.49354e-05	OMEM6G05779.1/OGRW100G010981.1/OGRW100G04977.1/OLAW128G010942.1/OLAW128G04902.1/OMAW171G05195.1/OMAW171G011065.1/OALW18G011188.1/OALW18G05079.1/OMIW190G05196.1/OMIW190G011179.1/OAUW26G05529.1/OOFW323G05660.1/OPUW363G010985.1/OPUW363G05300.1/ORHW375G05397.1/OBRW59G05125.1/OEIW71G05617.1/OGLW97G005684.1	19
GO:0030148	sphingolipid biosynthetic process	19/190905	21/383722	0.000101478	0.000233273	9.49354e-05	OMEM6G09322.1/OGRW100G014587.1/OGRW100G019389.1/OLAW128G014794.1/OLAW128G019354.1/OMAW171G019378.1/OMAW171G014644.1/OALW18G019811.1/OALW18G015022.1/OMIW190G014754.1/OMIW190G019577.1/OAUW26G09497.1/OOFW323G010052.1/OPUW363G014183.1/OPUW363G019223.1/ORHW375G09088.1/OBRW59G08530.1/OEIW71G09273.1/OGLW97G009048.1	19
GO:0030154	cell difFtrentiation	19/190905	21/383722	0.000101478	0.000233273	9.49354e-05	OMEM6G015068.1/OGRW100G023189.1/OGRW100G027084.1/OLAW128G027947.1/OLAW128G023051.1/OMAW171G028287.1/OMAW171G023180.1/OALW18G023593.1/OALW18G027684.1/OMIW190G023372.1/OMIW190G028387.1/OAUW26G013426.1/OOFW323G013823.1/OPUW363G023124.1/OPUW363G027955.1/ORHW375G013055.1/OBRW59G012105.1/OEIW71G013155.1/OGLW97G0013023.1	19
GO:0030245	cellulose catabolic process	19/190905	21/383722	0.000101478	0.000233273	9.49354e-05	OMEM6G05628.1/OGRW100G010824.1/OGRW100G04827.1/OLAW128G010786.1/OLAW128G04752.1/OMAW171G05034.1/OMAW171G010914.1/OALW18G011042.1/OALW18G04917.1/OMIW190G05029.1/OMIW190G011035.1/OAUW26G05369.1/OOFW323G05509.1/OPUW363G010821.1/OPUW363G05140.1/ORHW375G05236.1/OBRW59G04984.1/OEIW71G05460.1/OGLW97G005532.1	19
GO:0030289	protein phosphatase 4 complex	19/190905	21/383722	0.000101478	0.000233273	9.49354e-05	OMEM6G024181.1/OGRW100G044709.1/OGRW100G049100.1/OLAW128G046404.1/OLAW128G049770.1/OMAW171G046611.1/OMAW171G050074.1/OALW18G048334.1/OALW18G045022.1/OMIW190G046936.1/OMIW190G050456.1/OAUW26G025295.1/OOFW323G025114.1/OPUW363G049798.1/OPUW363G046339.1/ORHW375G025187.1/OBRW59G021961.1/OEIW71G025230.1/OGLW97G0025163.1	19
GO:0030628	pre-mRNA 3'-splice site binding	19/190905	21/383722	0.000101478	0.000233273	9.49354e-05	OMEM6G029652.1/OGRW100G058016.1/OGRW100G060890.1/OLAW128G060739.1/OLAW128G058245.1/OMAW171G061973.1/OMAW171G059035.1/OALW18G058435.1/OALW18G061406.1/OMIW190G059294.1/OMIW190G062290.1/OAUW26G030992.1/OOFW323G030939.1/OPUW363G061727.1/OPUW363G058821.1/ORHW375G031012.1/OBRW59G026720.1/OEIW71G031100.1/OGLW97G0031165.1	19
GO:0030904	retromer complex	19/190905	21/383722	0.000101478	0.000233273	9.49354e-05	OMEM6G07622.1/OGRW100G012926.1/OGRW100G017368.1/OLAW128G013019.1/OLAW128G017649.1/OMAW171G017593.1/OMAW171G012981.1/OALW18G018090.1/OALW18G013272.1/OMIW190G012979.1/OMIW190G017847.1/OAUW26G07534.1/OOFW323G08375.1/OPUW363G012840.1/OPUW363G017544.1/ORHW375G07308.1/OBRW59G07002.1/OEIW71G07529.1/OGLW97G007610.1	19
GO:0030906	retromer, cargo-selective complex	19/190905	21/383722	0.000101478	0.000233273	9.49354e-05	OMEM6G012464.1/OGRW100G025575.1/OGRW100G029210.1/OLAW128G030390.1/OLAW128G025217.1/OMAW171G030502.1/OMAW171G025553.1/OALW18G026095.1/OALW18G029940.1/OMIW190G025678.1/OMIW190G030789.1/OAUW26G015954.1/OOFW323G016124.1/OPUW363G025315.1/OPUW363G030212.1/ORHW375G015629.1/OBRW59G014074.1/OEIW71G015951.1/OGLW97G0015605.1	19
GO:0031122	cytoplasmic microtubule organization	19/190905	21/383722	0.000101478	0.000233273	9.49354e-05	OMEM6G019603.1/OGRW100G037002.1/OGRW100G040614.1/OLAW128G041833.1/OLAW128G038449.1/OMAW171G042319.1/OMAW171G038896.1/OALW18G037180.1/OALW18G040749.1/OMIW190G042558.1/OMIW190G039209.1/OAUW26G020717.1/OOFW323G020621.1/OPUW363G038471.1/OPUW363G041936.1/ORHW375G020621.1/OBRW59G018168.1/OEIW71G020768.1/OGLW97G0020211.1	19
GO:0031422	RecQ helicase-Topo III complex	19/190905	21/383722	0.000101478	0.000233273	9.49354e-05	OMEM6G016775.1/OGRW100G033979.1/OGRW100G030749.1/OLAW128G032111.1/OLAW128G035596.1/OMAW171G035819.1/OMAW171G032113.1/OALW18G030925.1/OALW18G034661.1/OMIW190G036218.1/OMIW190G032472.1/OAUW26G017656.1/OOFW323G017539.1/OPUW363G035556.1/OPUW363G031841.1/ORHW375G017461.1/OBRW59G015514.1/OEIW71G017732.1/OGLW97G0017407.1	19
GO:0032367	intracellular cholesterol transport	19/190905	21/383722	0.000101478	0.000233273	9.49354e-05	OMEM6G02892.1/OGRW100G07989.1/OGRW100G02183.1/OLAW128G07840.1/OLAW128G02064.1/OMAW171G02211.1/OMAW171G08081.1/OALW18G08186.1/OALW18G02196.1/OMIW190G02190.1/OMIW190G08076.1/OAUW26G02454.1/OOFW323G02700.1/OPUW363G08050.1/OPUW363G02324.1/ORHW375G02415.1/OBRW59G02542.1/OEIW71G02680.1/OGLW97G002659.1	19
GO:0032783	ELL-EAF complex	19/190905	21/383722	0.000101478	0.000233273	9.49354e-05	OMEM6G02745.1/OGRW100G07907.1/OGRW100G02116.1/OLAW128G07769.1/OLAW128G01997.1/OMAW171G02156.1/OMAW171G08019.1/OALW18G08109.1/OALW18G02127.1/OMIW190G02135.1/OMIW190G08024.1/OAUW26G02381.1/OOFW323G02644.1/OPUW363G07995.1/OPUW363G02263.1/ORHW375G02351.1/OBRW59G02486.1/OEIW71G02612.1/OGLW97G002586.1	19
GO:0032886	regulation of microtubule-based process	19/190905	21/383722	0.000101478	0.000233273	9.49354e-05	OMEM6G023030.1/OGRW100G043668.1/OGRW100G048039.1/OLAW128G045206.1/OLAW128G048724.1/OMAW171G045483.1/OMAW171G048935.1/OALW18G047162.1/OALW18G043962.1/OMIW190G045801.1/OMIW190G049283.1/OAUW26G024092.1/OOFW323G023923.1/OPUW363G048650.1/OPUW363G045228.1/ORHW375G023990.1/OBRW59G020982.1/OEIW71G024074.1/OGLW97G0023857.1	19
GO:0032984	macromolecular complex disassembly	19/190905	21/383722	0.000101478	0.000233273	9.49354e-05	OMEM6G017460.1/OGRW100G034748.1/OGRW100G031454.1/OLAW128G032891.1/OLAW128G036334.1/OMAW171G036619.1/OMAW171G032874.1/OALW18G031727.1/OALW18G035400.1/OMIW190G036971.1/OMIW190G033257.1/OAUW26G018446.1/OOFW323G018279.1/OPUW363G036261.1/OPUW363G032545.1/ORHW375G018227.1/OBRW59G016206.1/OEIW71G018481.1/OGLW97G0018131.1	19
GO:0033567	DNA replication, Okazaki fragment processing	19/190905	21/383722	0.000101478	0.000233273	9.49354e-05	OMEM6G018293.1/OGRW100G035564.1/OGRW100G032236.1/OLAW128G033753.1/OLAW128G037135.1/OMAW171G037432.1/OMAW171G033676.1/OALW18G032578.1/OALW18G036209.1/OMIW190G037795.1/OMIW190G033871.1/OAUW26G019289.1/OOFW323G019106.1/OPUW363G037103.1/OPUW363G033352.1/ORHW375G019076.1/OBRW59G016909.1/OEIW71G019325.1/OGLW97G0018987.1	19
GO:0033947	mannosylglycoprotein endo-beta-mannosidase activity	19/190905	21/383722	0.000101478	0.000233273	9.49354e-05	OMEM6G021111.1/OGRW100G038527.1/OGRW100G041895.1/OLAW128G043239.1/OLAW128G039682.1/OMAW171G043613.1/OMAW171G040206.1/OALW18G038621.1/OALW18G042077.1/OMIW190G043960.1/OMIW190G040487.1/OAUW26G022083.1/OOFW323G021939.1/OPUW363G039819.1/OPUW363G043295.1/ORHW375G021968.1/OBRW59G019328.1/OEIW71G022120.1/OGLW97G0021734.1	19
GO:0034427	nuclear-transcribed mRNA catabolic process, exonucleolytic, 3'-5'	19/190905	21/383722	0.000101478	0.000233273	9.49354e-05	OMEM6G010202.1/OGRW100G015456.1/OGRW100G020321.1/OLAW128G015720.1/OLAW128G020221.1/OMAW171G020315.1/OMAW171G015537.1/OALW18G020895.1/OALW18G015962.1/OMIW190G015674.1/OMIW190G020500.1/OAUW26G010496.1/OOFW323G010930.1/OPUW363G015543.1/OPUW363G020171.1/ORHW375G010012.1/OBRW59G09327.1/OEIW71G010160.1/OGLW97G0010012.1	19
GO:0034450	ubiquitin-ubiquitin ligase activity	19/190905	21/383722	0.000101478	0.000233273	9.49354e-05	OMEM6G015801.1/OGRW100G023620.1/OGRW100G027476.1/OLAW128G028403.1/OLAW128G023475.1/OMAW171G028708.1/OMAW171G023613.1/OALW18G024051.1/OALW18G028075.1/OMIW190G023787.1/OMIW190G028739.1/OAUW26G013904.1/OOFW323G014255.1/OPUW363G023482.1/OPUW363G028370.1/ORHW375G013590.1/OBRW59G012464.1/OEIW71G013592.1/OGLW97G0013487.1	19
GO:0034508	centromere complex assembly	19/190905	21/383722	0.000101478	0.000233273	9.49354e-05	OMEM6G016383.1/OGRW100G033555.1/OGRW100G030330.1/OLAW128G031662.1/OLAW128G035246.1/OMAW171G035355.1/OMAW171G031682.1/OALW18G030457.1/OALW18G034248.1/OMIW190G035763.1/OMIW190G031997.1/OAUW26G017175.1/OOFW323G017051.1/OPUW363G035100.1/OPUW363G031365.1/ORHW375G016957.1/OBRW59G015187.1/OEIW71G017187.1/OGLW97G0016976.1	19
GO:0035065	regulation of histone acetylation	19/190905	21/383722	0.000101478	0.000233273	9.49354e-05	OMEM6G012058.1/OGRW100G025164.1/OGRW100G028825.1/OLAW128G029958.1/OLAW128G024837.1/OMAW171G030156.1/OMAW171G025138.1/OALW18G025652.1/OALW18G029482.1/OMIW190G025262.1/OMIW190G030387.1/OAUW26G015546.1/OOFW323G015708.1/OPUW363G024911.1/OPUW363G029810.1/ORHW375G015190.1/OBRW59G013706.1/OEIW71G015529.1/OGLW97G0015162.1	19
GO:0035312	5'-3' exodeoxyribonuclease activity	19/190905	21/383722	0.000101478	0.000233273	9.49354e-05	OMEM6G04657.1/OGRW100G09859.1/OGRW100G03948.1/OLAW128G09788.1/OLAW128G03842.1/OMAW171G04068.1/OMAW171G09947.1/OALW18G010060.1/OALW18G04012.1/OMIW190G04070.1/OMIW190G010047.1/OAUW26G04404.1/OOFW323G04585.1/OPUW363G09881.1/OPUW363G04209.1/ORHW375G04253.1/OBRW59G04194.1/OEIW71G04534.1/OGLW97G004593.1	19
GO:0035598	N6-threonylcarbomyladenosine methylthiotransFtrase activity	19/190905	21/383722	0.000101478	0.000233273	9.49354e-05	OMEM6G017052.1/OGRW100G034319.1/OGRW100G031043.1/OLAW128G032450.1/OLAW128G035901.1/OMAW171G036178.1/OMAW171G032431.1/OALW18G031294.1/OALW18G034979.1/OMIW190G036549.1/OMIW190G032830.1/OAUW26G018001.1/OOFW323G017871.1/OPUW363G035865.1/OPUW363G032152.1/ORHW375G017784.1/OBRW59G015811.1/OEIW71G018065.1/OGLW97G0017709.1	19
GO:0035600	tRNA methylthiolation	19/190905	21/383722	0.000101478	0.000233273	9.49354e-05	OMEM6G017052.1/OGRW100G034319.1/OGRW100G031043.1/OLAW128G032450.1/OLAW128G035901.1/OMAW171G036178.1/OMAW171G032431.1/OALW18G031294.1/OALW18G034979.1/OMIW190G036549.1/OMIW190G032830.1/OAUW26G018001.1/OOFW323G017871.1/OPUW363G035865.1/OPUW363G032152.1/ORHW375G017784.1/OBRW59G015811.1/OEIW71G018065.1/OGLW97G0017709.1	19
GO:0036265	RNA (guanine-N7)-methylation	19/190905	21/383722	0.000101478	0.000233273	9.49354e-05	OMEM6G012015.1/OGRW100G025126.1/OGRW100G028787.1/OLAW128G029914.1/OLAW128G024801.1/OMAW171G030113.1/OMAW171G025092.1/OALW18G025612.1/OALW18G029438.1/OMIW190G025228.1/OMIW190G030337.1/OAUW26G015506.1/OOFW323G015664.1/OPUW363G024875.1/OPUW363G029764.1/ORHW375G015141.1/OBRW59G013666.1/OEIW71G015483.1/OGLW97G0015122.1	19
GO:0036361	racemase activity, acting on amino acids and derivatives	19/190905	21/383722	0.000101478	0.000233273	9.49354e-05	OMEM6G03054.1/OGRW100G08201.1/OGRW100G02398.1/OLAW128G08067.1/OLAW128G02294.1/OMAW171G02416.1/OMAW171G08291.1/OALW18G08422.1/OALW18G02407.1/OMIW190G02362.1/OMIW190G08266.1/OAUW26G02668.1/OOFW323G02900.1/OPUW363G08250.1/OPUW363G02505.1/ORHW375G02602.1/OBRW59G02748.1/OEIW71G02871.1/OGLW97G002886.1	19
GO:0036377	arbuscular mycorrhizal association	19/190905	21/383722	0.000101478	0.000233273	9.49354e-05	OMEM6G022882.1/OGRW100G043515.1/OGRW100G047892.1/OLAW128G045074.1/OLAW128G048589.1/OMAW171G045336.1/OMAW171G048768.1/OALW18G047016.1/OALW18G043820.1/OMIW190G045670.1/OMIW190G049113.1/OAUW26G023947.1/OOFW323G023746.1/OPUW363G048505.1/OPUW363G045056.1/ORHW375G023831.1/OBRW59G020857.1/OEIW71G023920.1/OGLW97G0023705.1	19
GO:0042025	host cell nucleus	19/190905	21/383722	0.000101478	0.000233273	9.49354e-05	OMEM6G036838.1/OGRW100G072488.1/OGRW100G070163.1/OLAW128G070869.1/OLAW128G072973.1/OMAW171G074580.1/OMAW171G072089.1/OALW18G071177.1/OALW18G073407.1/OMIW190G074938.1/OMIW190G072454.1/OAUW26G038482.1/OOFW323G038384.1/OPUW363G074440.1/OPUW363G071962.1/ORHW375G038759.1/OBRW59G033197.1/OEIW71G038901.1/OGLW97G0039188.1	19
GO:0042284	sphingolipid delta-4 desaturase activity	19/190905	21/383722	0.000101478	0.000233273	9.49354e-05	OMEM6G09322.1/OGRW100G014587.1/OGRW100G019389.1/OLAW128G014794.1/OLAW128G019354.1/OMAW171G019378.1/OMAW171G014644.1/OALW18G019811.1/OALW18G015022.1/OMIW190G014754.1/OMIW190G019577.1/OAUW26G09497.1/OOFW323G010052.1/OPUW363G014183.1/OPUW363G019223.1/ORHW375G09088.1/OBRW59G08530.1/OEIW71G09273.1/OGLW97G009048.1	19
GO:0042752	regulation of circadian rhythm	19/190905	21/383722	0.000101478	0.000233273	9.49354e-05	OMEM6G028462.1/OGRW100G053412.1/OGRW100G056871.1/OLAW128G054140.1/OLAW128G057137.1/OMAW171G057851.1/OMAW171G054401.1/OALW18G053749.1/OALW18G057251.1/OMIW190G054772.1/OMIW190G058026.1/OAUW26G029836.1/OOFW323G029562.1/OPUW363G057612.1/OPUW363G054213.1/ORHW375G029695.1/OBRW59G025648.1/OEIW71G029883.1/OGLW97G0030048.1	19
GO:0042761	very long-chain fatty acid biosynthetic process	19/190905	21/383722	0.000101478	0.000233273	9.49354e-05	OMEM6G015068.1/OGRW100G023189.1/OGRW100G027084.1/OLAW128G027947.1/OLAW128G023051.1/OMAW171G028287.1/OMAW171G023180.1/OALW18G023593.1/OALW18G027684.1/OMIW190G023372.1/OMIW190G028387.1/OAUW26G013426.1/OOFW323G013823.1/OPUW363G023124.1/OPUW363G027955.1/ORHW375G013055.1/OBRW59G012105.1/OEIW71G013155.1/OGLW97G0013023.1	19
GO:0042793	transcription from plastid promoter	19/190905	21/383722	0.000101478	0.000233273	9.49354e-05	OMEM6G04059.1/OGRW100G09241.1/OGRW100G03355.1/OLAW128G09145.1/OLAW128G03253.1/OMAW171G03446.1/OMAW171G09309.1/OALW18G09425.1/OALW18G03418.1/OMIW190G03441.1/OMIW190G09388.1/OAUW26G03741.1/OOFW323G03948.1/OPUW363G09289.1/OPUW363G03588.1/ORHW375G03637.1/OBRW59G03672.1/OEIW71G03924.1/OGLW97G003988.1	19
GO:0043014	alpha-tubulin binding	19/190905	21/383722	0.000101478	0.000233273	9.49354e-05	OMEM6G011789.1/OGRW100G024860.1/OGRW100G028535.1/OLAW128G029629.1/OLAW128G024553.1/OMAW171G029841.1/OMAW171G024813.1/OALW18G025353.1/OALW18G029184.1/OMIW190G024978.1/OMIW190G030056.1/OAUW26G015244.1/OOFW323G015384.1/OPUW363G024608.1/OPUW363G029487.1/ORHW375G014858.1/OBRW59G013436.1/OEIW71G015180.1/OGLW97G0014854.1	19
GO:0043175	RNA polymerase core enzyme binding	19/190905	21/383722	0.000101478	0.000233273	9.49354e-05	OMEM6G019431.1/OGRW100G036801.1/OGRW100G040416.1/OLAW128G041631.1/OLAW128G038263.1/OMAW171G042133.1/OMAW171G038687.1/OALW18G036979.1/OALW18G040554.1/OMIW190G042426.1/OMIW190G039031.1/OAUW26G020497.1/OOFW323G020410.1/OPUW363G038298.1/OPUW363G041740.1/ORHW375G020424.1/OBRW59G018003.1/OEIW71G020574.1/OGLW97G0020013.1	19
GO:0043190	ATP-binding cassette (ABC) transporter complex	19/190905	21/383722	0.000101478	0.000233273	9.49354e-05	OMEM6G017990.1/OGRW100G035286.1/OGRW100G031964.1/OLAW128G033441.1/OLAW128G036849.1/OMAW171G037147.1/OMAW171G033377.1/OALW18G032304.1/OALW18G035942.1/OMIW190G037515.1/OMIW190G034163.1/OAUW26G018986.1/OOFW323G018803.1/OPUW363G036791.1/OPUW363G033063.1/ORHW375G018796.1/OBRW59G016650.1/OEIW71G019035.1/OGLW97G0018710.1	19
GO:0043484	regulation of RNA splicing	19/190905	21/383722	0.000101478	0.000233273	9.49354e-05	OMEM6G02960.1/OGRW100G08055.1/OGRW100G02241.1/OLAW128G07925.1/OLAW128G02113.1/OMAW171G02285.1/OMAW171G08133.1/OALW18G08276.1/OALW18G02242.1/OMIW190G02262.1/OMIW190G08127.1/OAUW26G02525.1/OOFW323G02754.1/OPUW363G08124.1/OPUW363G02369.1/ORHW375G02466.1/OBRW59G02621.1/OEIW71G02731.1/OGLW97G002725.1	19
GO:0043743	LPPG:FO 2-phospho-L-lactate transFtrase activity	19/190905	21/383722	0.000101478	0.000233273	9.49354e-05	OMEM6G03424.1/OGRW100G08587.1/OGRW100G02743.1/OLAW128G08491.1/OLAW128G02629.1/OMAW171G02796.1/OMAW171G08684.1/OALW18G08815.1/OALW18G02752.1/OMIW190G02803.1/OMIW190G08673.1/OAUW26G03045.1/OOFW323G03321.1/OPUW363G08622.1/OPUW363G02908.1/ORHW375G02999.1/OBRW59G03071.1/OEIW71G03268.1/OGLW97G003262.1	19
GO:0044070	regulation of anion transport	19/190905	21/383722	0.000101478	0.000233273	9.49354e-05	OMEM6G010818.1/OGRW100G016092.1/OGRW100G021035.1/OLAW128G016432.1/OLAW128G020877.1/OMAW171G020974.1/OMAW171G016264.1/OALW18G021353.1/OALW18G016689.1/OMIW190G016349.1/OMIW190G021197.1/OAUW26G011161.1/OOFW323G011616.1/OPUW363G016175.1/OPUW363G020859.1/ORHW375G010726.1/OBRW59G09950.1/OEIW71G010826.1/OGLW97G0010707.1	19
GO:0044548	S100 protein binding	19/190905	21/383722	0.000101478	0.000233273	9.49354e-05	OMEM6G04467.1/OGRW100G09673.1/OGRW100G03756.1/OLAW128G09595.1/OLAW128G03653.1/OMAW171G03877.1/OMAW171G09772.1/OALW18G09864.1/OALW18G03827.1/OMIW190G03866.1/OMIW190G09862.1/OAUW26G04204.1/OOFW323G04404.1/OPUW363G09709.1/OPUW363G04016.1/ORHW375G04067.1/OBRW59G04029.1/OEIW71G04359.1/OGLW97G004412.1	19
GO:0045040	protein import into mitochondrial outer membrane	19/190905	21/383722	0.000101478	0.000233273	9.49354e-05	OMEM6G05837.1/OGRW100G011044.1/OGRW100G05032.1/OLAW128G010996.1/OLAW128G04953.1/OMAW171G05247.1/OMAW171G011115.1/OALW18G011251.1/OALW18G05134.1/OMIW190G05261.1/OMIW190G011235.1/OAUW26G05603.1/OOFW323G05742.1/OPUW363G011032.1/OPUW363G05352.1/ORHW375G05453.1/OBRW59G05186.1/OEIW71G05678.1/OGLW97G005734.1	19
GO:0045041	protein import into mitochondrial intermembrane space	19/190905	21/383722	0.000101478	0.000233273	9.49354e-05	OMEM6G017801.1/OGRW100G035086.1/OGRW100G031779.1/OLAW128G033251.1/OLAW128G036672.1/OMAW171G036961.1/OMAW171G033198.1/OALW18G032104.1/OALW18G035752.1/OMIW190G037322.1/OMIW190G034350.1/OAUW26G018797.1/OOFW323G018616.1/OPUW363G036595.1/OPUW363G032880.1/ORHW375G018595.1/OBRW59G016474.1/OEIW71G018844.1/OGLW97G0018489.1	19
GO:0045158	electron transporter, transFtrring electrons within cytochrome b6/f complex of photosystem II activity	19/190905	21/383722	0.000101478	0.000233273	9.49354e-05	OMEM6G028338.1/OGRW100G053292.1/OGRW100G056749.1/OLAW128G054019.1/OLAW128G057011.1/OMAW171G057728.1/OMAW171G054275.1/OALW18G053627.1/OALW18G057121.1/OMIW190G054647.1/OMIW190G057909.1/OAUW26G029678.1/OOFW323G029437.1/OPUW363G057486.1/OPUW363G054088.1/ORHW375G029577.1/OBRW59G025538.1/OEIW71G029761.1/OGLW97G0029929.1	19
GO:0045739	positive regulation of DNA repair	19/190905	21/383722	0.000101478	0.000233273	9.49354e-05	OMEM6G023131.1/OGRW100G043784.1/OGRW100G048159.1/OLAW128G045321.1/OLAW128G048825.1/OMAW171G045584.1/OMAW171G049046.1/OALW18G047273.1/OALW18G044075.1/OMIW190G045911.1/OMIW190G049403.1/OAUW26G024196.1/OOFW323G024060.1/OPUW363G048757.1/OPUW363G045340.1/ORHW375G024100.1/OBRW59G021080.1/OEIW71G024179.1/OGLW97G0023978.1	19
GO:0046522	S-methyl-5-thioribose kinase activity	19/190905	21/383722	0.000101478	0.000233273	9.49354e-05	OMEM6G018934.1/OGRW100G036287.1/OGRW100G054548.1/OLAW128G034482.1/OLAW128G037777.1/OMAW171G038144.1/OMAW171G034366.1/OALW18G033336.1/OALW18G054896.1/OMIW190G038502.1/OMIW190G034849.1/OAUW26G019988.1/OOFW323G019791.1/OPUW363G037783.1/OPUW363G034050.1/ORHW375G019834.1/OBRW59G017536.1/OEIW71G020017.1/OGLW97G0019549.1	19
GO:0046608	carotenoid isomerase activity	19/190905	21/383722	0.000101478	0.000233273	9.49354e-05	OMEM6G038984.1/OGRW100G074598.1/OGRW100G076882.1/OLAW128G077584.1/OLAW128G074884.1/OMAW171G079628.1/OMAW171G076723.1/OALW18G075643.1/OALW18G078120.1/OMIW190G080065.1/OMIW190G077189.1/OAUW26G040359.1/OOFW323G040667.1/OPUW363G076575.1/OPUW363G079375.1/ORHW375G041154.1/OBRW59G035083.1/OEIW71G041168.1/OGLW97G0041710.1	19
GO:0046975	histone methyltransFtrase activity (H3-K36 specific)	19/190905	21/383722	0.000101478	0.000233273	9.49354e-05	OMEM6G08964.1/OGRW100G013982.1/OGRW100G018770.1/OLAW128G014112.1/OLAW128G018727.1/OMAW171G018734.1/OMAW171G013998.1/OALW18G019192.1/OALW18G014367.1/OMIW190G014111.1/OMIW190G018898.1/OAUW26G08835.1/OOFW323G09412.1/OPUW363G013452.1/OPUW363G018566.1/ORHW375G08372.1/OBRW59G07986.1/OEIW71G08602.1/OGLW97G008592.1	19
GO:0047793	cycloeucalenol cycloisomerase activity	19/190905	21/383722	0.000101478	0.000233273	9.49354e-05	OMEM6G038205.1/OGRW100G073836.1/OGRW100G076223.1/OLAW128G076754.1/OLAW128G074148.1/OMAW171G078841.1/OMAW171G075951.1/OALW18G074806.1/OALW18G077344.1/OMIW190G079279.1/OMIW190G076390.1/OAUW26G039610.1/OOFW323G039880.1/OPUW363G075810.1/OPUW363G078583.1/ORHW375G040305.1/OBRW59G034349.1/OEIW71G040333.1/OGLW97G0040795.1	19
GO:0048280	vesicle fusion with Golgi apparatus	19/190905	21/383722	0.000101478	0.000233273	9.49354e-05	OMEM6G041354.1/OGRW100G079214.1/OGRW100G081378.1/OLAW128G082430.1/OLAW128G079999.1/OMAW171G082104.1/OMAW171G084563.1/OALW18G080556.1/OALW18G082824.1/OMIW190G085156.1/OMIW190G082664.1/OAUW26G042787.1/OOFW323G043431.1/OPUW363G082050.1/OPUW363G084547.1/ORHW375G043871.1/OBRW59G037156.1/OEIW71G043970.1/OGLW97G0044601.1	19
GO:0048367	shoot system development	19/190905	21/383722	0.000101478	0.000233273	9.49354e-05	OMEM6G01820.1/OGRW100G046701.1/OGRW100G01118.1/OLAW128G06617.1/OLAW128G0997.1/OMAW171G01033.1/OMAW171G06953.1/OALW18G050219.1/OALW18G01105.1/OMIW190G01009.1/OMIW190G06922.1/OAUW26G01109.1/OOFW323G01551.1/OPUW363G06874.1/OPUW363G01090.1/ORHW375G01181.1/OBRW59G01474.1/OEIW71G01407.1/OGLW97G001282.1	19
GO:0048658	anther wall tapetum development	19/190905	21/383722	0.000101478	0.000233273	9.49354e-05	OMEM6G028827.1/OGRW100G053777.1/OGRW100G057253.1/OLAW128G054543.1/OLAW128G057506.1/OMAW171G058237.1/OMAW171G054797.1/OALW18G054107.1/OALW18G057651.1/OMIW190G055177.1/OMIW190G058436.1/OAUW26G030229.1/OOFW323G029958.1/OPUW363G058029.1/OPUW363G054610.1/ORHW375G030093.1/OBRW59G025985.1/OEIW71G030279.1/OGLW97G0030465.1	19
GO:0050515	4-(cytidine 5'-diphospho)-2-C-methyl-D-erythritol kinase activity	19/190905	21/383722	0.000101478	0.000233273	9.49354e-05	OMEM6G04824.1/OGRW100G010048.1/OGRW100G04089.1/OLAW128G09981.1/OLAW128G04007.1/OMAW171G04246.1/OMAW171G010121.1/OALW18G010248.1/OALW18G04157.1/OMIW190G04185.1/OMIW190G010227.1/OAUW26G04571.1/OOFW323G04765.1/OPUW363G010051.1/OPUW363G04383.1/ORHW375G04424.1/OBRW59G04315.1/OEIW71G04697.1/OGLW97G004751.1	19
GO:0051028	mRNA transport	19/190905	21/383722	0.000101478	0.000233273	9.49354e-05	OMEM6G014918.1/OGRW100G023044.1/OGRW100G026941.1/OLAW128G027780.1/OLAW128G022916.1/OMAW171G028137.1/OMAW171G023042.1/OALW18G023433.1/OALW18G027530.1/OMIW190G023228.1/OMIW190G028214.1/OAUW26G013291.1/OOFW323G013672.1/OPUW363G022918.1/OPUW363G027793.1/ORHW375G012887.1/OBRW59G011970.1/OEIW71G012998.1/OGLW97G0012860.1	19
GO:0051117	ATPase binding	19/190905	21/383722	0.000101478	0.000233273	9.49354e-05	OMEM6G017460.1/OGRW100G034748.1/OGRW100G031454.1/OLAW128G032891.1/OLAW128G036334.1/OMAW171G036619.1/OMAW171G032874.1/OALW18G031727.1/OALW18G035400.1/OMIW190G036971.1/OMIW190G033257.1/OAUW26G018446.1/OOFW323G018279.1/OPUW363G036261.1/OPUW363G032545.1/ORHW375G018227.1/OBRW59G016206.1/OEIW71G018481.1/OGLW97G0018131.1	19
GO:0051304	chromosome separation	19/190905	21/383722	0.000101478	0.000233273	9.49354e-05	OMEM6G011709.1/OGRW100G024761.1/OGRW100G028458.1/OLAW128G029518.1/OLAW128G024476.1/OMAW171G029758.1/OMAW171G024718.1/OALW18G025244.1/OALW18G029108.1/OMIW190G024898.1/OMIW190G029965.1/OAUW26G015145.1/OOFW323G015290.1/OPUW363G024535.1/OPUW363G029403.1/ORHW375G014765.1/OBRW59G013357.1/OEIW71G015084.1/OGLW97G0014767.1	19
GO:0051723	protein methylesterase activity	19/190905	21/383722	0.000101478	0.000233273	9.49354e-05	OMEM6G017116.1/OGRW100G034375.1/OGRW100G031109.1/OLAW128G032518.1/OLAW128G035966.1/OMAW171G036242.1/OMAW171G032497.1/OALW18G031360.1/OALW18G035045.1/OMIW190G036610.1/OMIW190G032894.1/OAUW26G018067.1/OOFW323G017931.1/OPUW363G035926.1/OPUW363G032213.1/ORHW375G017847.1/OBRW59G015878.1/OEIW71G018131.1/OGLW97G0017784.1	19
GO:0051751	alpha-1,4-mannosyltransFtrase activity	19/190905	21/383722	0.000101478	0.000233273	9.49354e-05	OMEM6G011464.1/OGRW100G024515.1/OGRW100G028237.1/OLAW128G029259.1/OLAW128G024232.1/OMAW171G029508.1/OMAW171G024454.1/OALW18G024968.1/OALW18G028843.1/OMIW190G024633.1/OMIW190G029699.1/OAUW26G014885.1/OOFW323G015023.1/OPUW363G024288.1/OPUW363G029135.1/ORHW375G014449.1/OBRW59G013143.1/OEIW71G014828.1/OGLW97G0014501.1	19
GO:0051903	S-(hydroxymethyl)glutathione dehydrogenase activity	19/190905	21/383722	0.000101478	0.000233273	9.49354e-05	OMEM6G010651.1/OGRW100G015940.1/OGRW100G020860.1/OLAW128G016250.1/OLAW128G020723.1/OMAW171G020804.1/OMAW171G016086.1/OALW18G021183.1/OALW18G016496.1/OMIW190G016176.1/OMIW190G021007.1/OAUW26G011002.1/OOFW323G011446.1/OPUW363G016004.1/OPUW363G020683.1/ORHW375G010536.1/OBRW59G09778.1/OEIW71G010671.1/OGLW97G0010533.1	19
GO:0052624	2-phytyl-1,4-naphthoquinone methyltransFtrase activity	19/190905	21/383722	0.000101478	0.000233273	9.49354e-05	OMEM6G017639.1/OGRW100G034923.1/OGRW100G031640.1/OLAW128G033073.1/OLAW128G036517.1/OMAW171G036791.1/OMAW171G033052.1/OALW18G031936.1/OALW18G035597.1/OMIW190G037143.1/OMIW190G034504.1/OAUW26G018645.1/OOFW323G018474.1/OPUW363G036436.1/OPUW363G032732.1/ORHW375G018439.1/OBRW59G016344.1/OEIW71G018689.1/OGLW97G0018329.1	19
GO:0070037	rRNA (pseudouridine) methyltransFtrase activity	19/190905	21/383722	0.000101478	0.000233273	9.49354e-05	OMEM6G07762.1/OGRW100G013095.1/OGRW100G017505.1/OLAW128G013177.1/OLAW128G017772.1/OMAW171G017766.1/OMAW171G013122.1/OALW18G018255.1/OALW18G013417.1/OMIW190G013161.1/OMIW190G018006.1/OAUW26G07711.1/OOFW323G08525.1/OPUW363G013007.1/OPUW363G017668.1/ORHW375G07466.1/OBRW59G07141.1/OEIW71G07719.1/OGLW97G007773.1	19
GO:0070476	rRNA (guanine-N7)-methylation	19/190905	21/383722	0.000101478	0.000233273	9.49354e-05	OMEM6G010572.1/OGRW100G015857.1/OGRW100G020758.1/OLAW128G016168.1/OLAW128G020637.1/OMAW171G020722.1/OMAW171G016009.1/OALW18G021101.1/OALW18G016399.1/OMIW190G016092.1/OMIW190G020928.1/OAUW26G010914.1/OOFW323G011359.1/OPUW363G015924.1/OPUW363G020597.1/ORHW375G010453.1/OBRW59G09696.1/OEIW71G010591.1/OGLW97G0010443.1	19
GO:0070577	lysine-acetylated histone binding	19/190905	21/383722	0.000101478	0.000233273	9.49354e-05	OMEM6G024186.1/OGRW100G044701.1/OGRW100G049106.1/OLAW128G046410.1/OLAW128G049775.1/OMAW171G046623.1/OMAW171G050079.1/OALW18G048339.1/OALW18G045028.1/OMIW190G046945.1/OMIW190G050462.1/OAUW26G025300.1/OOFW323G025121.1/OPUW363G049812.1/OPUW363G046350.1/ORHW375G025191.1/OBRW59G021966.1/OEIW71G025236.1/OGLW97G0025170.1	19
GO:0070628	proteasome binding	19/190905	21/383722	0.000101478	0.000233273	9.49354e-05	OMEM6G024186.1/OGRW100G044701.1/OGRW100G049106.1/OLAW128G046410.1/OLAW128G049775.1/OMAW171G046623.1/OMAW171G050079.1/OALW18G048339.1/OALW18G045028.1/OMIW190G046945.1/OMIW190G050462.1/OAUW26G025300.1/OOFW323G025121.1/OPUW363G049812.1/OPUW363G046350.1/ORHW375G025191.1/OBRW59G021966.1/OEIW71G025236.1/OGLW97G0025170.1	19
GO:0070682	proteasome regulatory particle assembly	19/190905	21/383722	0.000101478	0.000233273	9.49354e-05	OMEM6G033514.1/OGRW100G064527.1/OGRW100G066903.1/OLAW128G067045.1/OLAW128G064564.1/OMAW171G066031.1/OMAW171G068416.1/OALW18G067497.1/OALW18G064932.1/OMIW190G068890.1/OMIW190G066190.1/OAUW26G034789.1/OOFW323G034626.1/OPUW363G068342.1/OPUW363G065678.1/ORHW375G034983.1/OBRW59G029989.1/OEIW71G035273.1/OGLW97G0035507.1	19
GO:0070985	TFIIK complex	19/190905	21/383722	0.000101478	0.000233273	9.49354e-05	OMEM6G021119.1/OGRW100G038533.1/OGRW100G041901.1/OLAW128G043245.1/OLAW128G039687.1/OMAW171G043621.1/OMAW171G040212.1/OALW18G038628.1/OALW18G042083.1/OMIW190G043967.1/OMIW190G040492.1/OAUW26G022089.1/OOFW323G021944.1/OPUW363G039825.1/OPUW363G043301.1/ORHW375G021974.1/OBRW59G019335.1/OEIW71G022124.1/OGLW97G0021741.1	19
GO:0071013	catalytic step 2 spliceosome	19/190905	21/383722	0.000101478	0.000233273	9.49354e-05	OMEM6G015250.1/OGRW100G023399.1/OGRW100G027289.1/OLAW128G028168.1/OLAW128G023232.1/OMAW171G028487.1/OMAW171G023410.1/OALW18G023820.1/OALW18G027897.1/OMIW190G023581.1/OMIW190G028624.1/OAUW26G013656.1/OOFW323G014050.1/OPUW363G023270.1/OPUW363G028166.1/ORHW375G013309.1/OBRW59G012297.1/OEIW71G013387.1/OGLW97G0013272.1	19
GO:0071108	protein K48-linked deubiquitination	19/190905	21/383722	0.000101478	0.000233273	9.49354e-05	OMEM6G016979.1/OGRW100G034230.1/OGRW100G030967.1/OLAW128G032376.1/OLAW128G035825.1/OMAW171G036090.1/OMAW171G032345.1/OALW18G031208.1/OALW18G034911.1/OMIW190G036462.1/OMIW190G032730.1/OAUW26G017924.1/OOFW323G017783.1/OPUW363G035780.1/OPUW363G032069.1/ORHW375G017699.1/OBRW59G015734.1/OEIW71G017973.1/OGLW97G0017628.1	19
GO:0071266	'de novo' L-methionine biosynthetic process	19/190905	21/383722	0.000101478	0.000233273	9.49354e-05	OMEM6G023312.1/OGRW100G043991.1/OGRW100G048347.1/OLAW128G045521.1/OLAW128G045531.1/OLAW128G049010.1/OMAW171G049254.1/OALW18G047499.1/OALW18G044276.1/OMIW190G046113.1/OMIW190G049619.1/OAUW26G024389.1/OOFW323G024262.1/OPUW363G048950.1/OPUW363G045547.1/ORHW375G024322.1/OBRW59G021259.1/OEIW71G024378.1/OGLW97G0024228.1	19
GO:0071816	tail-anchored membrane protein insertion into ER membrane	19/190905	21/383722	0.000101478	0.000233273	9.49354e-05	OMEM6G023491.1/OGRW100G044146.1/OGRW100G048499.1/OLAW128G045692.1/OLAW128G049161.1/OMAW171G045940.1/OMAW171G049412.1/OALW18G047656.1/OALW18G044437.1/OMIW190G046264.1/OMIW190G049769.1/OAUW26G024573.1/OOFW323G024416.1/OPUW363G049087.1/OPUW363G045693.1/ORHW375G024491.1/OBRW59G021404.1/OEIW71G024537.1/OGLW97G0024412.1	19
GO:0071821	FANCM-MHF complex	19/190905	21/383722	0.000101478	0.000233273	9.49354e-05	OMEM6G016810.1/OGRW100G034041.1/OGRW100G030791.1/OLAW128G032168.1/OLAW128G035636.1/OMAW171G035913.1/OMAW171G032155.1/OALW18G030989.1/OALW18G034704.1/OMIW190G036276.1/OMIW190G032523.1/OAUW26G017721.1/OOFW323G017589.1/OPUW363G035602.1/OPUW363G031878.1/ORHW375G017508.1/OBRW59G015544.1/OEIW71G017775.1/OGLW97G0017456.1	19
GO:0071951	conversion of methionyl-tRNA to N-formyl-methionyl-tRNA	19/190905	21/383722	0.000101478	0.000233273	9.49354e-05	OMEM6G03936.1/OGRW100G09105.1/OGRW100G03223.1/OLAW128G08991.1/OLAW128G03153.1/OMAW171G03320.1/OMAW171G08787.1/OALW18G09294.1/OALW18G03284.1/OMIW190G03323.1/OMIW190G08789.1/OAUW26G03587.1/OOFW323G03812.1/OPUW363G09163.1/OPUW363G03437.1/ORHW375G03504.1/OBRW59G03552.1/OEIW71G03775.1/OGLW97G003837.1	19
GO:0080009	mRNA methylation	19/190905	21/383722	0.000101478	0.000233273	9.49354e-05	OMEM6G024279.1/OGRW100G045091.1/OGRW100G049356.1/OLAW128G046791.1/OLAW128G050032.1/OMAW171G046933.1/OMAW171G050369.1/OALW18G048608.1/OALW18G045284.1/OMIW190G047247.1/OMIW190G050757.1/OAUW26G025607.1/OOFW323G025436.1/OPUW363G050290.1/OPUW363G046653.1/ORHW375G025519.1/OBRW59G022189.1/OEIW71G025537.1/OGLW97G0025500.1	19
GO:0080113	regulation of seed growth	19/190905	21/383722	0.000101478	0.000233273	9.49354e-05	OMEM6G036902.1/OGRW100G072559.1/OGRW100G070245.1/OLAW128G070948.1/OLAW128G073095.1/OMAW171G074657.1/OMAW171G072240.1/OALW18G071258.1/OALW18G073483.1/OMIW190G075023.1/OMIW190G072607.1/OAUW26G038546.1/OOFW323G038467.1/OPUW363G074516.1/OPUW363G072045.1/ORHW375G038847.1/OBRW59G033271.1/OEIW71G038977.1/OGLW97G0039267.1	19
GO:0080123	jasmonate-amino synthetase activity	19/190905	21/383722	0.000101478	0.000233273	9.49354e-05	OMEM6G022672.1/OGRW100G040061.1/OGRW100G043319.1/OLAW128G044825.1/OLAW128G041121.1/OMAW171G045111.1/OMAW171G041745.1/OALW18G040212.1/OALW18G043586.1/OMIW190G045461.1/OMIW190G042049.1/OAUW26G023730.1/OOFW323G023492.1/OPUW363G041349.1/OPUW363G044832.1/ORHW375G023570.1/OBRW59G020632.1/OEIW71G023677.1/OGLW97G0023478.1	19
GO:0090391	granum assembly	19/190905	21/383722	0.000101478	0.000233273	9.49354e-05	OMEM6G028069.1/OGRW100G053059.1/OGRW100G056547.1/OLAW128G053755.1/OLAW128G056794.1/OMAW171G057450.1/OMAW171G053995.1/OALW18G053383.1/OALW18G056905.1/OMIW190G054374.1/OMIW190G057669.1/OAUW26G029389.1/OOFW323G029164.1/OPUW363G057227.1/OPUW363G053852.1/ORHW375G029328.1/OBRW59G025317.1/OEIW71G029493.1/OGLW97G0029675.1	19
GO:0106073	NA	19/190905	21/383722	0.000101478	0.000233273	9.49354e-05	OMEM6G017608.1/OGRW100G034880.1/OGRW100G031600.1/OLAW128G033031.1/OLAW128G036476.1/OMAW171G036757.1/OMAW171G033018.1/OALW18G031880.1/OALW18G035556.1/OMIW190G037113.1/OMIW190G034543.1/OAUW26G018607.1/OOFW323G018431.1/OPUW363G036403.1/OPUW363G032694.1/ORHW375G018401.1/OBRW59G016316.1/OEIW71G018649.1/OGLW97G0018293.1	19
GO:1904263	positive regulation of TORC1 signaling	19/190905	21/383722	0.000101478	0.000233273	9.49354e-05	OMEM6G03469.1/OGRW100G08639.1/OGRW100G02788.1/OLAW128G08534.1/OLAW128G02670.1/OMAW171G02842.1/OMAW171G09232.1/OALW18G08859.1/OALW18G02796.1/OMIW190G02849.1/OMIW190G09297.1/OAUW26G03086.1/OOFW323G03366.1/OPUW363G08674.1/OPUW363G02982.1/ORHW375G03043.1/OBRW59G03118.1/OEIW71G03314.1/OGLW97G003316.1	19
GO:1905775	negative regulation of DNA helicase activity	19/190905	21/383722	0.000101478	0.000233273	9.49354e-05	OMEM6G038592.1/OGRW100G074207.1/OGRW100G076519.1/OLAW128G077162.1/OLAW128G074509.1/OMAW171G079218.1/OMAW171G076273.1/OALW18G075187.1/OALW18G077710.1/OMIW190G079684.1/OMIW190G076697.1/OAUW26G039995.1/OOFW323G040214.1/OPUW363G076159.1/OPUW363G078939.1/ORHW375G040646.1/OBRW59G034790.1/OEIW71G040664.1/OGLW97G0041259.1	19
GO:0006821	chloride transport	153/190905	248/383722	0.000102042	0.000234277	9.53442e-05	OMEM6G04053.1/OGRW100G09235.1/OGRW100G03351.1/OLAW128G09139.1/OLAW128G03247.1/OMAW171G03440.1/OMAW171G03441.1/OMAW171G09304.1/OALW18G09419.1/OALW18G03414.1/OMIW190G09383.1/OAUW26G03736.1/OOFW323G03942.1/OPUW363G09285.1/OPUW363G03579.1/ORHW375G03630.1/OBRW59G03666.1/OEIW71G03916.1/OGLW97G003979.1/OMEM6G09924.1/OGRW100G015191.1/OGRW100G020036.1/OLAW128G015437.1/OLAW128G019952.1/OMAW171G020008.1/OMA…	153
GO:0016756	glutathione gamma-glutamylcysteinyltransFtrase activity	35/190905	45/383722	0.000108554	0.000248606	0.000101176	OMEM6G022763.1/OGRW100G038707.1/OGRW100G043404.1/OGRW100G042057.1/OLAW128G043408.1/OLAW128G044934.1/OLAW128G039821.1/OLAW128G048460.1/OMAW171G043779.1/OMAW171G045208.1/OMAW171G040372.1/OMAW171G048653.1/OALW18G038799.1/OALW18G046904.1/OALW18G042231.1/OALW18G043683.1/OMIW190G045554.1/OMIW190G040642.1/OMIW190G048990.1/OAUW26G022276.1/OAUW26G023831.1/OOFW323G022106.1/OOFW323G023622.1/OPUW363G039999.1…	35
GO:0046938	phytochelatin biosynthetic process	35/190905	45/383722	0.000108554	0.000248606	0.000101176	OMEM6G022763.1/OGRW100G038707.1/OGRW100G043404.1/OGRW100G042057.1/OLAW128G043408.1/OLAW128G044934.1/OLAW128G039821.1/OLAW128G048460.1/OMAW171G043779.1/OMAW171G045208.1/OMAW171G040372.1/OMAW171G048653.1/OALW18G038799.1/OALW18G046904.1/OALW18G042231.1/OALW18G043683.1/OMIW190G045554.1/OMIW190G040642.1/OMIW190G048990.1/OAUW26G022276.1/OAUW26G023831.1/OOFW323G022106.1/OOFW323G023622.1/OPUW363G039999.1…	35
GO:0005267	potassium channel activity	56/190905	79/383722	0.000110895	0.000253651	0.000103229	OMEM6G03998.1/OGRW100G09181.1/OGRW100G03293.1/OLAW128G09085.1/OLAW128G03189.1/OMAW171G03383.1/OMAW171G08705.1/OALW18G09366.1/OALW18G03360.1/OMIW190G03377.1/OMIW190G08699.1/OAUW26G03671.1/OOFW323G03887.1/OPUW363G09230.1/OPUW363G03515.1/ORHW375G03576.1/OBRW59G03618.1/OEIW71G03857.1/OGLW97G003915.1/OMEM6G012074.1/OGRW100G028835.1/OLAW128G029973.1/OLAW128G024847.1/OMAW171G030168.1/OMAW171G025154.1/OA…	56
GO:0000956	nuclear-transcribed mRNA catabolic process	59/190905	84/383722	0.000111467	0.000254327	0.000103504	OMEM6G01986.1/OGRW100G046480.1/OGRW100G01313.1/OLAW128G06855.1/OLAW128G01195.1/OMAW171G01242.1/OMAW171G07176.1/OALW18G049999.1/OALW18G01322.1/OMIW190G01221.1/OMIW190G07138.1/OAUW26G01356.1/OOFW323G01774.1/OPUW363G07076.1/OPUW363G01315.1/ORHW375G01420.1/OBRW59G01660.1/OEIW71G01643.1/OGLW97G001501.1/OMEM6G05359.1/OGLW97G005277.1/OMEM6G017148.1/OGRW100G034406.1/OGRW100G031143.1/OLAW128G032549.1/OLAW…	59
GO:0008276	protein methyltransFtrase activity	59/190905	84/383722	0.000111467	0.000254327	0.000103504	OMEM6G028975.1/OGRW100G053929.1/OGRW100G053930.1/OGRW100G057399.1/OLAW128G054689.1/OLAW128G057651.1/OMAW171G058394.1/OMAW171G054966.1/OALW18G054265.1/OALW18G054266.1/OALW18G057789.1/OMIW190G055346.1/OMIW190G058589.1/OAUW26G030394.1/OOFW323G030117.1/OPUW363G058183.1/OPUW363G054763.1/ORHW375G030257.1/OBRW59G026139.1/OEIW71G030436.1/OGLW97G0030624.1/OMEM6G025544.1/OGRW100G045989.1/OGRW100G050272.1/O…	59
GO:0034314	Arp2/3 complex-mediated actin nucleation	98/190905	151/383722	0.000123003	0.0002803	0.000114074	OMEM6G03693.1/OGRW100G08858.1/OGRW100G02998.1/OLAW128G08758.1/OLAW128G02885.1/OMAW171G03074.1/OMAW171G09025.1/OALW18G09069.1/OALW18G03045.1/OMIW190G03085.1/OMIW190G09022.1/OAUW26G03318.1/OOFW323G03589.1/OPUW363G08908.1/OPUW363G03202.1/ORHW375G03269.1/OBRW59G03314.1/OEIW71G03534.1/OGLW97G003586.1/OMEM6G07479.1/OGRW100G012733.1/OGRW100G017223.1/OLAW128G012854.1/OLAW128G017494.1/OMAW171G017426.1/OMA…	98
GO:0003972	RNA ligase (ATP) activity	21/190905	24/383722	0.000126426	0.000286681	0.000116671	OMEM6G026756.1/OGRW100G051688.1/OGRW100G055369.1/OLAW128G052355.1/OLAW128G052356.1/OLAW128G055734.1/OMAW171G056179.1/OMAW171G052788.1/OALW18G052094.1/OALW18G055720.1/OMIW190G053167.1/OMIW190G056454.1/OMIW190G056455.1/OAUW26G028038.1/OOFW323G027963.1/OPUW363G055931.1/OPUW363G052600.1/ORHW375G028034.1/OBRW59G024239.1/OEIW71G028139.1/OGLW97G0028145.1	21
GO:0004334	fumarylacetoacetase activity	21/190905	24/383722	0.000126426	0.000286681	0.000116671	OMEM6G07203.1/OGRW100G012410.1/OGRW100G016907.1/OLAW128G012559.1/OLAW128G017206.1/OMAW171G017090.1/OMAW171G012488.1/OALW18G017617.1/OALW18G012836.1/OMIW190G012504.1/OMIW190G017371.1/OAUW26G011434.1/OAUW26G026963.1/OAUW26G07046.1/OOFW323G07859.1/OPUW363G012366.1/OPUW363G017023.1/ORHW375G06818.1/OBRW59G06602.1/OEIW71G06992.1/OGLW97G007089.1	21
GO:0004814	arginine-tRNA ligase activity	21/190905	24/383722	0.000126426	0.000286681	0.000116671	OMEM6G019658.1/OGRW100G037046.1/OGRW100G040651.1/OLAW128G041893.1/OLAW128G038483.1/OMAW171G042363.1/OMAW171G038949.1/OALW18G037236.1/OALW18G040793.1/OMIW190G042515.1/OMIW190G039261.1/OAUW26G020751.1/OAUW26G0521.1/OOFW323G020665.1/OPUW363G038518.1/OPUW363G041982.1/ORHW375G020664.1/OBRW59G018208.1/OEIW71G020811.1/OGLW97G0020258.1/OAUW26G023850.1	21
GO:0006420	arginyl-tRNA aminoacylation	21/190905	24/383722	0.000126426	0.000286681	0.000116671	OMEM6G019658.1/OGRW100G037046.1/OGRW100G040651.1/OLAW128G041893.1/OLAW128G038483.1/OMAW171G042363.1/OMAW171G038949.1/OALW18G037236.1/OALW18G040793.1/OMIW190G042515.1/OMIW190G039261.1/OAUW26G020751.1/OAUW26G0521.1/OOFW323G020665.1/OPUW363G038518.1/OPUW363G041982.1/ORHW375G020664.1/OBRW59G018208.1/OEIW71G020811.1/OGLW97G0020258.1/OAUW26G023850.1	21
GO:0033557	Slx1-Slx4 complex	16/190905	17/383722	0.000127306	0.000288321	0.000117338	OMEM6G026962.1/OGRW100G051905.1/OGRW100G055598.1/OLAW128G052634.1/OMAW171G056540.1/OMAW171G053006.1/OALW18G052309.1/OMIW190G053380.1/OMIW190G056680.1/OOFW323G028189.1/OPUW363G056160.1/OPUW363G052850.1/ORHW375G028265.1/OBRW59G024415.1/OEIW71G028427.1/OGLW97G0028440.1	16
GO:0048015	phosphatidylinositol-mediated signaling	57/190905	81/383722	0.000133438	0.000301465	0.000122688	OMEM6G011749.1/OGRW100G024826.1/OGRW100G028503.1/OLAW128G029586.1/OLAW128G024522.1/OMAW171G029809.1/OMAW171G024781.1/OALW18G025315.1/OALW18G029153.1/OMIW190G024947.1/OMIW190G030020.1/OAUW26G015207.1/OOFW323G015350.1/OPUW363G024578.1/OPUW363G029451.1/ORHW375G014825.1/OBRW59G013405.1/OEIW71G015142.1/OGLW97G0014821.1/OMEM6G019785.1/OGRW100G037175.1/OGRW100G040793.1/OLAW128G042039.1/OLAW128G038604.1/…	57
GO:0070475	rRNA base methylation	57/190905	81/383722	0.000133438	0.000301465	0.000122688	OMEM6G03602.1/OGRW100G08754.1/OGRW100G02909.1/OLAW128G08655.1/OLAW128G02791.1/OMAW171G02981.1/OMAW171G09107.1/OALW18G08972.1/OALW18G02946.1/OMIW190G02987.1/OMIW190G09165.1/OAUW26G03215.1/OOFW323G03496.1/OPUW363G08807.1/OPUW363G03107.1/ORHW375G03173.1/OBRW59G03237.1/OEIW71G03448.1/OGLW97G003477.1/OMEM6G06196.1/OGRW100G011459.1/OGRW100G05415.1/OLAW128G011430.1/OLAW128G05353.1/OMAW171G05674.1/OMAW17…	57
GO:0006388	tRNA splicing, via endonucleolytic cleavage and ligation	49/190905	68/383722	0.000152985	0.000345201	0.000140487	OMEM6G024957.1/OGRW100G045473.1/OGRW100G049706.1/OGRW100G077042.1/OLAW128G047046.1/OLAW128G050330.1/OLAW128G075065.1/OMAW171G047241.1/OMAW171G050665.1/OMAW171G076910.1/OALW18G048974.1/OALW18G045611.1/OALW18G078283.1/OMIW190G047608.1/OMIW190G080244.1/OMIW190G051069.1/OAUW26G025995.1/OAUW26G040515.1/OOFW323G025745.1/OPUW363G050478.1/OPUW363G046965.1/ORHW375G025821.1/ORHW375G041376.1/OBRW59G022505.1…	49
GO:0016984	ribulose-bisphosphate carboxylase activity	65/190905	95/383722	0.000176604	0.000398009	0.000161978	OMEM6G020198.1/OMEM6G020269.1/OMEM6G024423.1/OMEM6G024424.1/OMEM6G030630.1/OMEM6G030631.1/OMEM6G032543.1/OMEM6G032544.1/OMEM6G03270.1/OMEM6G040761.1/OMEM6G08122.1/OMEM6G08219.1/OMEM6G08392.1/OGRW100G033279.1/OGRW100G05770.1/OGRW100G060491.1/OGRW100G072934.1/OGRW100G027963.1/OGRW100G066974.1/OLAW128G015956.1/OLAW128G046724.1/OLAW128G05613.1/OLAW128G068410.1/OLAW128G069475.1/OLAW128G081787.1/OLAW12…	65
GO:0016776	phosphotransFtrase activity, phosphate group as acceptor	94/190905	145/383722	0.000177576	0.000399708	0.00016267	OMEM6G038288.1/OMEM6G040452.1/OGRW100G073874.1/OGRW100G078296.1/OGRW100G076249.1/OGRW100G080592.1/OLAW128G076799.1/OLAW128G081507.1/OLAW128G074193.1/OLAW128G079132.1/OMAW171G078895.1/OMAW171G081208.1/OMAW171G075995.1/OMAW171G083696.1/OALW18G074852.1/OALW18G079571.1/OALW18G077396.1/OALW18G081975.1/OMIW190G079335.1/OMIW190G084241.1/OMIW190G076426.1/OMIW190G081597.1/OAUW26G041774.1/OOFW323G039921.1/…	94
GO:0004556	alpha-amylase activity	115/190905	182/383722	0.000178587	0.000401493	0.000163396	OMEM6G031532.1/OMEM6G031533.1/OMEM6G033770.1/OGRW100G059929.1/OGRW100G064801.1/OGRW100G064803.1/OGRW100G062596.1/OGRW100G067162.1/OGRW100G067163.1/OLAW128G062734.1/OLAW128G062738.1/OLAW128G067332.1/OLAW128G067333.1/OLAW128G059812.1/OLAW128G059815.1/OLAW128G064836.1/OMAW171G063917.1/OMAW171G066307.1/OMAW171G066311.1/OMAW171G060956.1/OMAW171G060957.1/OMAW171G068699.1/OALW18G060416.1/OALW18G060419.1…	115
GO:0004478	methionine adenosyltransFtrase activity	47/190905	65/383722	0.000181357	0.000406727	0.000165526	OMEM6G02166.1/OMEM6G02312.1/OGRW100G036812.1/OGRW100G07473.1/OGRW100G01571.1/OGRW100G01723.1/OGRW100G040428.1/OLAW128G041642.1/OLAW128G07116.1/OLAW128G07276.1/OLAW128G01584.1/OLAW128G038276.1/OMAW171G01522.1/OMAW171G01675.1/OMAW171G042143.1/OMAW171G038698.1/OMAW171G07597.1/OALW18G036990.1/OALW18G07490.1/OALW18G07667.1/OALW18G01733.1/OALW18G040566.1/OMIW190G01499.1/OMIW190G01667.1/OMIW190G042732.1…	47
GO:0006556	S-adenosylmethionine biosynthetic process	47/190905	65/383722	0.000181357	0.000406727	0.000165526	OMEM6G02166.1/OMEM6G02312.1/OGRW100G036812.1/OGRW100G07473.1/OGRW100G01571.1/OGRW100G01723.1/OGRW100G040428.1/OLAW128G041642.1/OLAW128G07116.1/OLAW128G07276.1/OLAW128G01584.1/OLAW128G038276.1/OMAW171G01522.1/OMAW171G01675.1/OMAW171G042143.1/OMAW171G038698.1/OMAW171G07597.1/OALW18G036990.1/OALW18G07490.1/OALW18G07667.1/OALW18G01733.1/OALW18G040566.1/OMIW190G01499.1/OMIW190G01667.1/OMIW190G042732.1…	47
GO:0003904	deoxyribodipyrimidine photo-lyase activity	18/190905	20/383722	0.000185508	0.000411023	0.000167275	OMEM6G035410.1/OGRW100G068454.1/OLAW128G068904.1/OLAW128G071302.1/OMAW171G072771.1/OMAW171G070163.1/OALW18G069203.1/OALW18G071655.1/OMIW190G073125.1/OMIW190G070608.1/OAUW26G036413.1/OOFW323G036416.1/OPUW363G072507.1/OPUW363G070016.1/ORHW375G036753.1/OBRW59G031472.1/OEIW71G037003.1/OGLW97G0037291.1	18
GO:0004789	thiamine-phosphate diphosphorylase activity	18/190905	20/383722	0.000185508	0.000411023	0.000167275	OMEM6G040321.1/OGRW100G078466.1/OGRW100G080458.1/OLAW128G081318.1/OLAW128G078992.1/OMAW171G081035.1/OALW18G079761.1/OALW18G081830.1/OMIW190G084042.1/OMIW190G081408.1/OAUW26G041589.1/OOFW323G042401.1/OPUW363G080870.1/OPUW363G083482.1/ORHW375G042797.1/OBRW59G036263.1/OEIW71G042814.1/OGLW97G0043256.1	18
GO:0005682	U5 snRNP	18/190905	20/383722	0.000185508	0.000411023	0.000167275	OMEM6G033285.1/OGRW100G064257.1/OGRW100G066673.1/OLAW128G066785.1/OLAW128G064321.1/OMAW171G065750.1/OMAW171G068147.1/OALW18G067235.1/OALW18G064696.1/OMIW190G068626.1/OMIW190G065935.1/OAUW26G034551.1/OOFW323G034365.1/OPUW363G068055.1/OPUW363G065352.1/OBRW59G029794.1/OEIW71G034989.1/OGLW97G0035194.1	18
GO:0005875	microtubule associated complex	18/190905	20/383722	0.000185508	0.000411023	0.000167275	OMEM6G01983.1/OGRW100G046482.1/OGRW100G01309.1/OLAW128G06851.1/OLAW128G01188.1/OMAW171G01239.1/OMAW171G07173.1/OALW18G050001.1/OMIW190G01217.1/OMIW190G07134.1/OAUW26G01352.1/OOFW323G01770.1/OPUW363G07073.1/OPUW363G01310.1/ORHW375G01416.1/OBRW59G01656.1/OEIW71G01638.1/OGLW97G001498.1	18
GO:0008108	UDP-glucose:hexose-1-phosphate uridylyltransFtrase activity	18/190905	20/383722	0.000185508	0.000411023	0.000167275	OMEM6G026584.1/OGRW100G051540.1/OGRW100G055226.1/OLAW128G052203.1/OLAW128G055580.1/OMAW171G056023.1/OALW18G051950.1/OALW18G055579.1/OMIW190G053008.1/OMIW190G056293.1/OAUW26G027888.1/OOFW323G027810.1/OPUW363G055772.1/OPUW363G052456.1/ORHW375G027876.1/OBRW59G024127.1/OEIW71G027991.1/OGLW97G0027993.1	18
GO:0018026	peptidyl-lysine monomethylation	18/190905	20/383722	0.000185508	0.000411023	0.000167275	OMEM6G05483.1/OGRW100G010681.1/OGRW100G04699.1/OLAW128G010637.1/OLAW128G04621.1/OMAW171G04885.1/OMAW171G010776.1/OALW18G010898.1/OMIW190G04873.1/OMIW190G010888.1/OAUW26G05237.1/OOFW323G05371.1/OPUW363G010676.1/OPUW363G05000.1/ORHW375G05087.1/OBRW59G04860.1/OEIW71G05325.1/OGLW97G005390.1	18
GO:0031146	SCF-dependent proteasomal ubiquitin-dependent protein catabolic process	18/190905	20/383722	0.000185508	0.000411023	0.000167275	OMEM6G020977.1/OGRW100G041757.1/OLAW128G043105.1/OLAW128G039562.1/OMAW171G043515.1/OMAW171G040096.1/OALW18G038482.1/OALW18G041950.1/OMIW190G043833.1/OMIW190G040367.1/OAUW26G021950.1/OOFW323G021804.1/OPUW363G039689.1/OPUW363G043164.1/ORHW375G021844.1/OBRW59G019214.1/OEIW71G021992.1/OGLW97G0021592.1	18
GO:0033499	galactose catabolic process via UDP-galactose	18/190905	20/383722	0.000185508	0.000411023	0.000167275	OMEM6G026584.1/OGRW100G051540.1/OGRW100G055226.1/OLAW128G052203.1/OLAW128G055580.1/OMAW171G056023.1/OALW18G051950.1/OALW18G055579.1/OMIW190G053008.1/OMIW190G056293.1/OAUW26G027888.1/OOFW323G027810.1/OPUW363G055772.1/OPUW363G052456.1/ORHW375G027876.1/OBRW59G024127.1/OEIW71G027991.1/OGLW97G0027993.1	18
GO:0047632	agmatine deiminase activity	18/190905	20/383722	0.000185508	0.000411023	0.000167275	OMEM6G017321.1/OGRW100G034600.1/OGRW100G05749.1/OGRW100G031326.1/OLAW128G032741.1/OLAW128G021091.1/OMAW171G036482.1/OALW18G031595.1/OALW18G05872.1/OMIW190G036841.1/OAUW26G018306.1/OOFW323G018136.1/OPUW363G036131.1/OPUW363G032425.1/ORHW375G018078.1/OBRW59G016080.1/OEIW71G018345.1/OGLW97G0017991.1	18
[truncated: 259 more rows]
